# Supplementary material for: Screening-level models to estimate partition ratios of organic chemicals between polymeric materials, air and water
Source: Royal Society of Chemistry journal article supplement (doi:10.1039/c5em00664c), 2016-01-01
Supplement: c5em00664c1.xlsx [file c5em00664c1.xlsx]

## Sheet: bulk material
Number	Compound	CAS	Material	Kma	logKma	Kmw	logKmw	DENSITY (g/cm^3)	New logKma	New logKmw	New Kma	New Kmw	NlogKmaTC	NlogKmwTC	TempC	TempK	Reference	RatioMeasured	Dimensions Initially	SMILES	MolarMass	logKOA	logKOW	logKAWasKowminusKoa	logKAWfromEPI	EstVP	SLVP	logSLVP	logEstVP	DU	Dhmw	Dhaw	logKAWatT	A	B	L	S	V
290	Phenanthrene	000085-01-8	LDPE	1.70642e+07	7.23209	19952.6	4.3	0.92	7.19587	4.26379	1.56991e+07	18356.4	7.14759	4.27559	24	297	(Adams RG, Lohmann R, Fernandez LA, Macfarlane JK, Gschwend PM, 2007)	Water (Log)	cm^3/g	C1=CC=C2C(=C1)C=CC3=CC=CC=C32	178.24	7.222	4.35	-2.872	-2.762	0.00576	0.0875	-1.05799	-2.23958	81.806	20	-101.806	-2.93209	0	0.23	7.71	1.34	1.45
1042	PCB-29	015862-07-4	LDPE	2.3097e+07	7.36356	125893	5.1	0.92	7.32734	5.06379	2.12492e+07	115821	7.28259	5.07559	24	297	(Adams RG, Lohmann R, Fernandez LA, Macfarlane JK, Gschwend PM, 2007)	Water (Log)	cm^3/g	C1=CC=C(C=C1)C2=CC(=C(C=C2Cl)Cl)Cl	257.55	7.897	5.69	-2.207	-2.087	0.00952	0.419	-0.377786	-2.02136	75.823	20	-95.823	-2.26356	0	0.13	8.13	1.42	1.69
1092	2,7/8-CI2DD (PCDD)	033857-26-0	LDPE	2.01605e+08	8.3045	316228	5.5	0.92	8.26829	5.46379	1.85477e+08	290930	8.21459	5.47559	24	297	(Adams RG, Lohmann R, Fernandez LA, Macfarlane JK, Gschwend PM, 2007)	Water (Log)	cm^3/g	C1=CC2=C(C=C1Cl)OC3=C(O2)C=C(C=C3)Cl	253.09	8.369	5.63	-2.739	-2.619	0.000309	0.00792	-2.10127	-3.51004	90.9826	20	-110.983	-2.8045	0	0.44	8.18	1.57	1.58
991	2-methyl phenanthrene	002531-84-2	LDPE	2.9424e+07	7.4687	63095.7	4.8	0.92	7.43249	4.76379	2.70701e+07	58048.1	7.38059	4.77559	24	297	(Adams RG, Lohmann R, Fernandez LA, Macfarlane JK, Gschwend PM, 2007)	Water (Log)	cm^3/g	CC1=CC2=C(C=C1)C3=CC=CC=C3C=C2	192.26	7.495	4.89	-2.605	-2.635	0.00889	0.0176	-1.75449	-2.0511	87.9323	20	-107.932	-2.6687	0	0.23	8.18	1.28	1.6
1125	PCB-52	035693-99-3	LDPE	2.32901e+07	7.36717	251189	5.4	0.92	7.33096	5.36379	2.14269e+07	231094	7.22448	5.38748	23	296	(Adams RG, Lohmann R, Fernandez LA, Macfarlane JK, Gschwend PM, 2007)	Water (Log)	cm^3/g	C1=CC(=C(C=C1Cl)C2=C(C=CC(=C2)Cl)Cl)Cl	291.99	8.177	6.34	-1.837	-2.087	0.00113	0.0105	-1.97881	-2.94692	89.9054	20	-109.905	-1.96717	0	0.18	8.64	1.55	1.81
1251	PCB-69	060233-24-1	LDPE	5.38104e+07	7.73087	398107	5.6	0.92	7.69465	5.56379	4.95056e+07	366259	7.64159	5.57559	24	297	(Adams RG, Lohmann R, Fernandez LA, Macfarlane JK, Gschwend PM, 2007)	Water (Log)	cm^3/g	C1=CC(=CC(=C1)Cl)C2=C(C=C(C=C2Cl)Cl)Cl	291.99	8.406	6.34	-2.066	-2.066	0.00113	0.0105	-1.97881	-2.94692	89.9054	20	-109.905	-2.13087	0	0.12	8.68	1.46	1.81
752	fluoranthene	000206-44-0	LDPE	4.32961e+08	8.63645	79432.8	4.9	0.92	8.60024	4.86379	3.98324e+08	73078.2	8.54659	4.87559	24	297	(Adams RG, Lohmann R, Fernandez LA, Macfarlane JK, Gschwend PM, 2007)	Water (Log)	cm^3/g	C1=CC=C2C(=C1)C3=CC=CC4=C3C2=CC=C4	202.26	8.601	4.93	-3.671	-3.441	0.000417	0.00811	-2.09098	-3.37986	90.892	20	-110.892	-3.73645	0	0.25	9.11	1.52	1.58
674	Pyrene	000129-00-0	LDPE	2.12738e+08	8.32785	100000	5	0.92	8.29163	4.96379	1.95719e+08	92000	8.23859	4.97559	24	297	(Adams RG, Lohmann R, Fernandez LA, Macfarlane JK, Gschwend PM, 2007)	Water (Log)	cm^3/g	C1=CC2=C3C(=C1)C=CC4=CC=CC(=C43)C=C2	202.26	8.193	4.93	-3.263	-3.313	4.59e-05	0.0106	-1.97469	-4.33819	89.8692	20	-109.869	-3.32785	0	0.25	9.11	1.52	1.58
1195	PCB-97	041464-51-1	LDPE	3.76877e+08	8.5762	1.99526e+06	6.3	0.92	8.53999	6.26379	3.46727e+08	1.83564e+06	8.48459	6.27559	24	297	(Adams RG, Lohmann R, Fernandez LA, Macfarlane JK, Gschwend PM, 2007)	Water (Log)	cm^3/g	C1=CC(=C(C(=C1)Cl)Cl)C2=CC(=C(C=C2Cl)Cl)Cl	326.44	9.189	6.98	-2.209	-2.519	0.000295	0.00373	-2.42829	-3.53018	93.8589	20	-113.859	-2.2762	0	0.11	9.5	1.59	1.94
1262	PCB-143	068194-15-0	LDPE	4.64026e+09	9.66654	6.30957e+06	6.8	0.92	9.63033	6.76379	4.26904e+09	5.80481e+06	9.57259	6.77559	24	297	(Adams RG, Lohmann R, Fernandez LA, Macfarlane JK, Gschwend PM, 2007)	Water (Log)	cm^3/g	C1=CC(=C(C(=C1)Cl)C2=CC(=C(C(=C2Cl)Cl)Cl)Cl)Cl	360.88	10.417	7.62	-2.797	-2.797	7.74e-05	0.00132	-2.87943	-4.11126	97.8271	20	-117.827	-2.86654	0	0	9.95	1.64	2.06
58	benz[a]anthracene	000056-55-3	LDPE	2.10963e+09	9.32421	501187	5.7	0.92	9.28799	5.66379	1.94086e+09	461092	9.22459	5.67559	24	297	(Adams RG, Lohmann R, Fernandez LA, Macfarlane JK, Gschwend PM, 2007)	Water (Log)	cm^3/g	C1=CC=C2C(=C1)C=CC3=CC4=CC=CC=C4C=C32	228.3	9.069	5.52	-3.549	-3.309	3.62e-05	0.000107	-3.97062	-4.44129	107.425	20	-127.425	-3.62421	0	0.29	10.08	1.66	1.82
973	d12-benz[a]anthracene	001718-53-2	LDPE	2.10963e+09	9.32421	501187	5.7	0.92	9.28799	5.66379	1.94086e+09	461092	9.22459	5.67559	24	297	(Adams RG, Lohmann R, Fernandez LA, Macfarlane JK, Gschwend PM, 2007)	Water (Log)	cm^3/g	C1=CC=C2C(=C1)C=CC3=CC4=CC=CC=C4C=C32	228.3	9.069	5.52	-3.549	-3.309	3.62e-05	0.000107	-3.97062	-4.44129	107.425	20	-127.425	-3.62421	0	0.29	10.08	1.66	1.82
780	Chrysene	000218-01-9	LDPE	5.42238e+09	9.73419	501187	5.7	0.92	9.69798	5.66379	4.98859e+09	461092	9.63559	5.67559	24	297	(Adams RG, Lohmann R, Fernandez LA, Macfarlane JK, Gschwend PM, 2007)	Water (Log)	cm^3/g	C1=CC=C2C(=C1)C=CC3=C2C=CC4=CC=CC=C43	228.3	9.48	5.52	-3.96	-3.67	2.08e-07	0.000168	-3.77469	-6.68194	105.702	20	-125.702	-4.03419	0	0.29	10.08	1.66	1.82
729	Benzo[e]pyrene	000192-97-2	LDPE	3.30773e+11	11.5195	1.58489e+06	6.2	0.92	11.4833	6.16379	3.04311e+11	1.4581e+06	11.4166	6.17559	24	297	(Adams RG, Lohmann R, Fernandez LA, Macfarlane JK, Gschwend PM, 2007)	Water (Log)	cm^3/g	C1=CC=C2C(=C1)C3=CC=CC4=C3C5=C(C=CC=C25)C=C4	252.32	11.351	6.11	-5.241	-4.911	2.58e-06	2.45e-05	-4.61083	-5.58838	113.056	20	-133.056	-5.31953	0	0.31	11.48	1.84	1.95
737	perylene	000198-55-0	LDPE	3.46548e+10	10.5398	3.16228e+06	6.5	0.92	10.5036	6.46379	3.18824e+10	2.9093e+06	10.4416	6.47559	24	297	(Adams RG, Lohmann R, Fernandez LA, Macfarlane JK, Gschwend PM, 2007)	Water (Log)	cm^3/g	C1=CC2=C3C(=C1)C4=CC=CC5=C4C(=CC=C5)C3=CC=C2	252.32	10.076	6.11	-3.966	-3.826	1.79e-07	0.000203	-3.6925	-6.74715	104.979	20	-124.979	-4.03976	0	0.31	11.48	1.84	1.95
870	pentachlorobenzene	000608-93-5	LDPE	3.5336e+06	6.54822	67608.3	4.83	0.92	6.512	4.79379	3.25091e+06	62199.6	6.33349	4.84149	21	294	(Bao, Xu, Liang, Zeng, 2011)	Water (Log)	cm^3/g	C1=C(C(=C(C(=C1Cl)Cl)Cl)Cl)Cl	250.34	6.712	5.22	-1.492	-1.542	0.227	0.54	-0.267606	-0.643974	74.8538	20	-94.8538	-1.71822	0	0	6	1.13	1.33
266	acenaphthene	000083-32-9	LDPE	2.30039e+06	6.3618	17782.8	4.25	0.92	6.32559	4.21379	2.11636e+06	16360.2	6.15549	4.26149	21	294	(Bao, Xu, Liang, Zeng, 2011)	Water (Log)	cm^3/g	C1CC2=CC=CC3=C2C1=CC=C3	154.21	6.044	4.15	-1.894	-2.124	0.172	1.36	0.133539	-0.764472	71.3254	20	-91.3254	-2.1118	0	0.15	6.56	0.99	1.26
310	fluorene	000086-73-7	LDPE	1.99514e+07	7.29997	32359.4	4.51	0.92	7.26376	4.47379	1.83553e+07	29770.6	7.08649	4.52149	21	294	(Bao, Xu, Liang, Zeng, 2011)	Water (Log)	cm^3/g	C1C2=CC=CC=C2C3=CC=CC=C31	166.22	6.585	4.02	-2.565	-2.405	0.044	0.619	-0.208309	-1.35655	74.3323	20	-94.3323	-2.78997	0	0.19	7.04	1.13	1.36
291	Phenanthrene	000085-01-8	LDPE	7.84869e+07	7.8948	60256	4.78	0.92	7.85859	4.74379	7.2208e+07	55435.5	7.66349	4.79149	21	294	(Bao, Xu, Liang, Zeng, 2011)	Water (Log)	cm^3/g	C1=CC=C2C(=C1)C=CC3=CC=CC=C32	178.24	7.222	4.35	-2.872	-2.762	0.00576	0.0875	-1.05799	-2.23958	81.806	20	-101.806	-3.1148	0	0.23	7.71	1.34	1.45
753	fluoranthene	000206-44-0	LDPE	7.33612e+08	8.86547	85113.8	4.93	0.92	8.82925	4.89379	6.74923e+08	78304.7	8.61249	4.94149	21	294	(Bao, Xu, Liang, Zeng, 2011)	Water (Log)	cm^3/g	C1=CC=C2C(=C1)C3=CC=CC4=C3C2=CC=C4	202.26	8.601	4.93	-3.671	-3.441	0.000417	0.00811	-2.09098	-3.37986	90.892	20	-110.892	-3.93547	0	0.25	9.11	1.52	1.58
675	Pyrene	000129-00-0	LDPE	3.93575e+08	8.59503	117490	5.07	0.92	8.55882	5.03379	3.62089e+08	108091	8.34449	5.08149	21	294	(Bao, Xu, Liang, Zeng, 2011)	Water (Log)	cm^3/g	C1=CC2=C3C(=C1)C=CC4=CC=CC(=C43)C=C2	202.26	8.193	4.93	-3.263	-3.313	4.59e-05	0.0106	-1.97469	-4.33819	89.8692	20	-109.869	-3.52503	0	0.25	9.11	1.52	1.58
204	o,p'-DDE	000072-55-9	LDPE	3.09942e+09	9.49128	870964	5.94	0.92	9.45507	5.90379	2.85146e+09	801287	9.23049	5.95149	21	294	(Bao, Xu, Liang, Zeng, 2011)	Water (Log)	cm^3/g	C1=CC(=CC=C1C(=C(Cl)Cl)C2=CC=C(C=C2)Cl)Cl	318.03	9.279	6	-3.279	-2.769	0.00913	0.00344	-2.46344	-2.03953	94.1681	20	-114.168	-3.55128	0	0.3	9.38	1.53	2.05
208	p,p'-DDE	000072-55-9	LDPE	5.64001e+09	9.75128	1.58489e+06	6.2	0.92	9.71507	6.16379	5.18881e+09	1.4581e+06	9.49049	6.21149	21	294	(Bao, Xu, Liang, Zeng, 2011)	Water (Log)	cm^3/g	C1=CC(=CC=C1C(=C(Cl)Cl)C2=CC=C(C=C2)Cl)Cl	318.03	9.279	6	-3.279	-2.769	0.00913	0.00344	-2.46344	-2.03953	94.1681	20	-114.168	-3.55128	0	0.3	9.38	1.53	2.05
191	p,p'-DDD	000072-54-8	LDPE	1.20406e+09	9.08065	120226	5.08	0.92	9.04444	5.04379	1.10774e+09	110608	8.81049	5.09149	21	294	(Bao, Xu, Liang, Zeng, 2011)	Water (Log)	cm^3/g	C1=CC(=CC=C1C(C2=CC=C(C=C2)Cl)C(Cl)Cl)Cl	320.05	9.589	5.87	-3.719	-3.569	0.0026	0.00123	-2.91009	-2.58503	98.0968	20	-118.097	-4.00065	0.09	0.22	9.45	1.44	2.1
186	o,p'-DDD	000072-54-8	LDPE	1.86487e+09	9.27065	186209	5.27	0.92	9.23444	5.23379	1.71568e+09	171312	9.00049	5.28149	21	294	(Bao, Xu, Liang, Zeng, 2011)	Water (Log)	cm^3/g	C1=CC(=CC=C1C(C2=CC=C(C=C2)Cl)C(Cl)Cl)Cl	320.05	9.589	5.87	-3.719	-3.569	0.0026	0.00123	-2.91009	-2.58503	98.0968	20	-118.097	-4.00065	0.09	0.22	9.45	1.44	2.1
17	p,p'-DDT	000050-29-3	LDPE	5.11981e+09	9.70925	660693	5.82	0.92	9.67304	5.78379	4.71023e+09	607838	9.41949	5.83149	21	294	(Bao, Xu, Liang, Zeng, 2011)	Water (Log)	cm^3/g	C1=CC(=CC=C1C(C2=CC=C(C=C2)Cl)C(Cl)(Cl)Cl)Cl	354.49	10.378	6.79	-3.588	-3.468	0.000996	0.000143	-3.84466	-3.00174	106.317	20	-126.317	-3.88925	0	0.22	9.88	1.51	2.22
11	o,p'-DDT	000050-29-3	LDPE	7.74915e+09	9.88925	1000000	6	0.92	9.85304	5.96379	7.12922e+09	920000	9.59949	6.01149	21	294	(Bao, Xu, Liang, Zeng, 2011)	Water (Log)	cm^3/g	C1=CC(=CC=C1C(C2=CC=C(C=C2)Cl)C(Cl)(Cl)Cl)Cl	354.49	10.378	6.79	-3.588	-3.468	0.000996	0.000143	-3.84466	-3.00174	106.317	20	-126.317	-3.88925	0	0.22	9.88	1.51	2.22
781	Chrysene	000218-01-9	LDPE	9.11562e+09	9.95979	501187	5.7	0.92	9.92357	5.66379	8.38637e+09	461092	9.67149	5.71149	21	294	(Bao, Xu, Liang, Zeng, 2011)	Water (Log)	cm^3/g	C1=CC=C2C(=C1)C=CC3=C2C=CC4=CC=CC=C43	228.3	9.48	5.52	-3.96	-3.67	2.08e-07	0.000168	-3.77469	-6.68194	105.702	20	-125.702	-4.25979	0	0.29	10.08	1.66	1.82
59	benz[a]anthracene	000056-55-3	LDPE	4.39437e+09	9.6429	616595	5.79	0.92	9.60668	5.75379	4.04282e+09	567267	9.35049	5.80149	21	294	(Bao, Xu, Liang, Zeng, 2011)	Water (Log)	cm^3/g	C1=CC=C2C(=C1)C=CC3=CC4=CC=CC=C4C=C32	228.3	9.069	5.52	-3.549	-3.309	3.62e-05	0.000107	-3.97062	-4.44129	107.425	20	-127.425	-3.8529	0	0.29	10.08	1.66	1.82
741	Benzo[b]fluoranthene	000205-99-2	LDPE	7.07199e+10	10.8495	2.13796e+06	6.33	0.92	10.8133	6.29379	6.50623e+10	1.96693e+06	10.5825	6.34149	21	294	(Bao, Xu, Liang, Zeng, 2011)	Water (Log)	cm^3/g	C1=CC=C2C3=C4C(=CC=C3)C5=CC=CC=C5C4=CC2=C1	252.32	10.351	6.11	-4.241	-4.571	3.32e-06	0.00173	-2.76195	-5.47886	96.7938	20	-116.794	-4.51954	0	0.31	11.48	1.84	1.95
770	Benzo[k]fluoranthene	000207-08-9	LDPE	3.21595e+11	11.5073	3.63078e+06	6.56	0.92	11.4711	6.52379	2.95868e+11	3.34032e+06	11.1935	6.57149	21	294	(Bao, Xu, Liang, Zeng, 2011)	Water (Log)	cm^3/g	C1=CC=C2C=C3C4=CC=CC5=C4C(=CC=C5)C3=CC2=C1	252.32	10.732	6.11	-4.622	-4.622	1.05e-07	1.02e-05	-4.9914	-6.97881	116.404	20	-136.404	-4.94731	0	0.31	11.48	1.84	1.95
41	Dibenz[ah]anthracene	000053-70-3	LDPE	3.92221e+12	12.5935	1.58489e+07	7.2	0.92	12.5573	7.16379	3.60843e+12	1.4581e+07	12.2905	7.21149	21	294	(Bao, Xu, Liang, Zeng, 2011)	Water (Log)	cm^3/g	C1=CC=C2C(=C1)C=CC3=CC4=C(C=CC5=CC=CC=C54)C=C32	278.36	11.779	6.7	-5.079	-5.239	1.85e-09	3.33e-05	-4.47756	-8.73283	111.884	20	-131.884	-5.39353	0	0.35	12.45	1.99	2.19
734	Indeno[123,cd]pyrene	000193-39-5	LDPE	1.74126e+12	12.2409	1.09648e+07	7.04	0.92	12.2047	7.00379	1.60196e+12	1.00876e+07	11.8985	7.05149	21	294	(Bao, Xu, Liang, Zeng, 2011)	Water (Log)	cm^3/g	c1ccc-2c(c1)-c3ccc4ccc5cccc6c5c4c3c2c6	276.34	11.547	6.7	-4.847	-4.847	1.67e-08	4.44e-07	-6.35262	-7.77728	128.377	20	-148.377	-5.20086	0	0.33	12.89	2.02	2.08
722	Benzo[ghi]perylene	000191-24-2	LDPE	9.08654e+12	12.9584	2.29087e+07	7.36	0.92	12.9222	7.32379	8.35962e+12	2.1076e+07	12.6425	7.37149	21	294	(Bao, Xu, Liang, Zeng, 2011)	Water (Log)	cm^3/g	c1cc2ccc3ccc4ccc5cccc6c5c4c3c2c6c1	276.34	11.971	6.7	-5.271	-5.271	1.17e-07	8.11e-06	-5.09098	-6.93181	117.28	20	-137.28	-5.5984	0	0.33	12.89	2.02	2.08
545	Cyclohexane	000110-82-7	Plywood	348	2.54158	1006.57	3.00285	xxxxxxxxx	xxxxxxxxx	xxxxxxxxx	xxxxxxxxx	xxxxxxxxx	2.49853	3.02653	23	296	(Bodalal et al., 2000)	Air	dimensionless	C1CCCCC1	84.16	2.652	3.18	0.528	0.788	12500	12900	4.11059	4.09691	36.3438	20	-56.3438	0.461267	0	0.02	3.02	0.28	0.85
412	Ethylbenzene	000100-41-4	Plywood	1640	3.21484	335.473	2.52566	xxxxxxxxx	xxxxxxxxx	xxxxxxxxx	xxxxxxxxx	xxxxxxxxx	3.16135	2.54935	23	296	(Bodalal et al., 2000)	Air	dimensionless	CCC1=CC=CC=C1	106.17	3.642	3.03	-0.612	-0.492	1010	1280	3.10721	3.00432	45.1694	20	-65.1694	-0.689186	0	0.12	3.92	0.64	1
964	Decane	001120-28-1	Plywood	6950	3.84198	4893.66	3.68963	xxxxxxxxx	xxxxxxxxx	xxxxxxxxx	xxxxxxxxx	xxxxxxxxx	3.73232	3.71332	23	296	(Bodalal et al., 2000)	Air	dimensionless	CCCCCCCCCCCCCCCCCCCC(=O)OC	326.57	9.229	9.21	-0.019	0.071	0.00278	0.0052	-2.284	-2.55596	92.5897	20	-112.59	-0.152351	0	0.42	10.76	0.65	3.14
510	Toluene	000108-88-3	Polyurethane carpet backing material	6170	3.79029	916.242	2.96201	xxxxxxxxx	xxxxxxxxx	xxxxxxxxx	xxxxxxxxx	xxxxxxxxx	3.7417	2.9857	23	296	(Bodalal et al., 2000)	Air	dimensionless	CC1=CC=CC=C1	92.14	3.296	2.54	-0.756	-0.566	3160	3790	3.57864	3.49969	41.0227	20	-61.0227	-0.828275	0	0.12	3.43	0.63	0.86
564	Nonane	000111-84-2	Polyurethane carpet backing material	6220	3.79379	92496	4.96612	xxxxxxxxx	xxxxxxxxx	xxxxxxxxx	xxxxxxxxx	xxxxxxxxx	3.73681	4.98981	23	296	(Bodalal et al., 2000)	Air	dimensionless	CCCCCCCCC	128.26	3.507	4.76	1.253	2.143	661	593	2.77305	2.8202	48.1086	20	-68.1086	1.17233	0	0.05	4.21	0.2	1.38
660	Decane	000124-18-5	Polyurethane carpet backing material	14600	4.16435	4.38086e+06	6.64156	xxxxxxxxx	xxxxxxxxx	xxxxxxxxx	xxxxxxxxx	xxxxxxxxx	4.10225	6.66525	23	296	(Bodalal et al., 2000)	Air	dimensionless	CCCCCCCCCC	142.29	2.687	5.25	2.563	2.323	231	191	2.28103	2.36361	52.4363	20	-72.4363	2.47721	0	0.05	4.71	0.21	1.52
963	Undecane	001120-21-4	Polyurethane carpet backing material	24300	4.38561	1.553e+06	6.19117	xxxxxxxxx	xxxxxxxxx	xxxxxxxxx	xxxxxxxxx	xxxxxxxxx	4.31786	6.21486	23	296	(Bodalal et al., 2000)	Air	dimensionless	CCCCCCCCCCC	156.31	3.843	5.74	1.897	1.897	83.8	54.9	1.73957	1.92324	57.1989	20	-77.1989	1.80557	0	0.06	5.2	0.21	1.66
410	Ethylbenzene	000100-41-4	Vinyl floor tile	1920	3.2833	392.749	2.59411	xxxxxxxxx	xxxxxxxxx	xxxxxxxxx	xxxxxxxxx	xxxxxxxxx	3.2298	2.6178	23	296	(Bodalal et al., 2000)	Air	dimensionless	CCC1=CC=CC=C1	106.17	3.642	3.03	-0.612	-0.492	1010	1280	3.10721	3.00432	45.1694	20	-65.1694	-0.689186	0	0.12	3.92	0.64	1
659	Decane	000124-18-5	Vinyl floor tile	13000	4.11394	3.90077e+06	6.59115	xxxxxxxxx	xxxxxxxxx	xxxxxxxxx	xxxxxxxxx	xxxxxxxxx	4.05184	6.61484	23	296	(Bodalal et al., 2000)	Air	dimensionless	CCCCCCCCCC	142.29	2.687	5.25	2.563	2.323	231	191	2.28103	2.36361	52.4363	20	-72.4363	2.47721	0	0.05	4.71	0.21	1.52
962	Undecane	001120-21-4	Vinyl floor tile	26600	4.42488	1.7e+06	6.23045	xxxxxxxxx	xxxxxxxxx	xxxxxxxxx	xxxxxxxxx	xxxxxxxxx	4.35714	6.25414	23	296	(Bodalal et al., 2000)	Air	dimensionless	CCCCCCCCCCC	156.31	3.843	5.74	1.897	1.897	83.8	54.9	1.73957	1.92324	57.1989	20	-77.1989	1.80557	0	0.06	5.2	0.21	1.66
881	Nonane	000613-29-6	Vinyl floor tile	2140	3.33041	31.8985	1.50377	xxxxxxxxx	xxxxxxxxx	xxxxxxxxx	xxxxxxxxx	xxxxxxxxx	3.24446	1.52746	23	296	(Bodalal et al., 2000)	Air	dimensionless	CCCCN(CCCC)C1=CC=CC=C1	205.35	6.837	5.12	-1.717	-1.717	0.946	0.981	-0.00833099	-0.0241089	72.5733	20	-92.5733	-1.82664	0	0.48	7.6	0.94	1.94
352	napthalene	000091-20-3	PDMS	2.05253e+06	6.31229	9120.11	3.96	xxxxxxxxx	xxxxxxxxx	xxxxxxxxx	xxxxxxxxx	xxxxxxxxx	5.95673	4.08173	15	288	(Brown, Akhtar, Akerman, Hampel, Kozin, Villerius, Klamer, 2001)	Water (Log)	dimensionless	C1=CC=C2C=CC=CC2=C1	128.18	5.045	3.17	-1.875	-1.745	5.38	39.9	1.60097	0.730782	58.418	20	-78.418	-2.35229	0	0.17	5.33	1.02	1.09
313	fluorene	000086-73-7	PDMS	1.47622e+07	7.16915	10715.2	4.03	xxxxxxxxx	xxxxxxxxx	xxxxxxxxx	xxxxxxxxx	xxxxxxxxx	6.71673	4.15173	15	288	(Brown, Akhtar, Akerman, Hampel, Kozin, Villerius, Klamer, 2001)	Water (Log)	dimensionless	C1C2=CC=CC=C2C3=CC=CC=C31	166.22	6.585	4.02	-2.565	-2.405	0.044	0.619	-0.208309	-1.35655	74.3323	20	-94.3323	-3.13915	0	0.19	7.04	1.13	1.36
296	Phenanthrene	000085-01-8	PDMS	4.91631e+07	7.69164	15848.9	4.2	xxxxxxxxx	xxxxxxxxx	xxxxxxxxx	xxxxxxxxx	xxxxxxxxx	7.19373	4.32173	15	288	(Brown, Akhtar, Akerman, Hampel, Kozin, Villerius, Klamer, 2001)	Water (Log)	dimensionless	C1=CC=C2C(=C1)C=CC3=CC=CC=C32	178.24	7.222	4.35	-2.872	-2.762	0.00576	0.0875	-1.05799	-2.23958	81.806	20	-101.806	-3.49164	0	0.23	7.71	1.34	1.45
605	Anthracene	000120-12-7	PDMS	6.2984e+07	7.79923	26915.3	4.43	xxxxxxxxx	xxxxxxxxx	xxxxxxxxx	xxxxxxxxx	xxxxxxxxx	7.29473	4.55173	15	288	(Brown, Akhtar, Akerman, Hampel, Kozin, Villerius, Klamer, 2001)	Water (Log)	dimensionless	C1=CC=C2C=C3C=CC=CC3=CC2=C1	178.24	7.093	4.35	-2.743	-2.643	0.000289	0.0659	-1.18111	-3.5391	82.8889	20	-102.889	-3.36923	0	0.23	7.71	1.34	1.45
606	Anthracene	000120-12-7	PDMS	7.06693e+07	7.84923	30199.5	4.48	xxxxxxxxx	xxxxxxxxx	xxxxxxxxx	xxxxxxxxx	xxxxxxxxx	7.34473	4.60173	15	288	(Brown, Akhtar, Akerman, Hampel, Kozin, Villerius, Klamer, 2001)	Water (Log)	dimensionless	C1=CC=C2C=C3C=CC=CC3=CC2=C1	178.24	7.093	4.35	-2.743	-2.643	0.000289	0.0659	-1.18111	-3.5391	82.8889	20	-102.889	-3.36923	0	0.23	7.71	1.34	1.45
789	acridine	000260-94-6	PDMS	2.65149e+09	9.42349	1479.11	3.17	xxxxxxxxx	xxxxxxxxx	xxxxxxxxx	xxxxxxxxx	xxxxxxxxx	8.93273	3.29173	15	288	(Brown, Akhtar, Akerman, Hampel, Kozin, Villerius, Klamer, 2001)	Water (Log)	dimensionless	C1=CC=C2C(=C1)C=C3C=CC=CC3=N2	179.22	8.961	3.32	-5.641	-5.561	0.00345	0.119	-0.924453	-2.46218	80.6314	20	-100.631	-6.25349	0	0.52	7.82	1.47	1.41
718	2-aminofluorene	000153-78-6	PDMS	1.32986e+09	9.12381	660.693	2.82	xxxxxxxxx	xxxxxxxxx	xxxxxxxxx	xxxxxxxxx	xxxxxxxxx	8.59873	2.94173	15	288	(Brown, Akhtar, Akerman, Hampel, Kozin, Villerius, Klamer, 2001)	Water (Log)	dimensionless	C1C2=CC=CC=C2C3=C1C=C(C=C3)N	181.24	8.757	3.1	-5.657	-5.617	0.00248	0.0272	-1.56543	-2.60555	86.2693	20	-106.269	-6.30381	0.23	0.5	8.22	1.52	1.46
855	acridone	000578-95-0	PDMS	3.88512e+12	12.5894	60256	4.78	xxxxxxxxx	xxxxxxxxx	xxxxxxxxx	xxxxxxxxx	xxxxxxxxx	12.0547	4.90173	15	288	(Brown, Akhtar, Akerman, Hampel, Kozin, Villerius, Klamer, 2001)	Water (Log)	dimensionless	C1=CC=C2C(=C1)C(=O)C3=CC=CC=C3N2	195.22	8.843	1.69	-7.153	-7.153	0.00169	0.018	-1.74473	-2.77211	87.8464	20	-107.846	-7.8094	0.06	0.63	8.74	1.58	1.47
756	fluoranthene	000206-44-0	PDMS	7.69026e+08	8.88594	34673.7	4.54	xxxxxxxxx	xxxxxxxxx	xxxxxxxxx	xxxxxxxxx	xxxxxxxxx	8.33273	4.66173	15	288	(Brown, Akhtar, Akerman, Hampel, Kozin, Villerius, Klamer, 2001)	Water (Log)	dimensionless	C1=CC=C2C(=C1)C3=CC=CC4=C3C2=CC=C4	202.26	8.601	4.93	-3.671	-3.441	0.000417	0.00811	-2.09098	-3.37986	90.892	20	-110.892	-4.34594	0	0.25	9.11	1.52	1.58
681	Pyrene	000129-00-0	PDMS	3.48109e+08	8.54172	40738	4.61	xxxxxxxxx	xxxxxxxxx	xxxxxxxxx	xxxxxxxxx	xxxxxxxxx	7.99473	4.73173	15	288	(Brown, Akhtar, Akerman, Hampel, Kozin, Villerius, Klamer, 2001)	Water (Log)	dimensionless	C1=CC2=C3C(=C1)C=CC4=CC=CC(=C43)C=C2	202.26	8.193	4.93	-3.263	-3.313	4.59e-05	0.0106	-1.97469	-4.33819	89.8692	20	-109.869	-3.93172	0	0.25	9.11	1.52	1.58
971	1-aminopyrene	001606-67-3	PDMS	1.66744e+11	11.222	1862.09	3.27	xxxxxxxxx	xxxxxxxxx	xxxxxxxxx	xxxxxxxxx	xxxxxxxxx	10.6037	3.39173	15	288	(Brown, Akhtar, Akerman, Hampel, Kozin, Villerius, Klamer, 2001)	Water (Log)	dimensionless	C1=CC2=C3C(=C1)C=CC4=C(C=CC(=C43)C=C2)N	217.27	11.232	4.02	-7.212	-6.922	6.37e-05	0.000493	-3.30715	-4.19586	101.589	20	-121.589	-7.95205	0.23	0.57	10.29	1.91	1.68
356	napthalene	000091-20-3	polyethylene	218561	5.33957	1698.24	3.23	0.93	5.30806	3.19848	203261	1579.37	5.13331	3.25831	20	293	(Choi, Cho, Luthy, 2013)	Water (Log)	cm^3/g	C1=CC=C2C=CC=CC2=C1	128.18	5.045	3.17	-1.875	-1.745	5.38	39.9	1.60097	0.730782	58.418	20	-78.418	-2.10957	0	0.17	5.33	1.02	1.09
333	1-methylnaphthalene	000090-12-0	polyethylene	227141	5.3563	1905.46	3.28	0.93	5.32478	3.24848	211241	1772.08	5.13531	3.30831	20	293	(Choi, Cho, Luthy, 2013)	Water (Log)	cm^3/g	CC1=CC=CC2=CC=CC=C12	142.2	5.547	3.72	-1.827	-1.677	4.91	11	1.04139	0.691081	63.34	20	-83.34	-2.0763	0	0.17	5.8	0.96	1.23
357	2-methylnaphthalene	000091-57-6	polyethylene	237404	5.37549	2041.74	3.31	0.93	5.34397	3.27848	220785	1898.82	5.15231	3.33831	20	293	(Choi, Cho, Luthy, 2013)	Water (Log)	cm^3/g	CC1=CC2=CC=CC=C2C=C1	142.2	5.534	3.72	-1.814	-1.674	4.61	9.08	0.958086	0.663701	64.0728	20	-84.0728	-2.06549	0	0.17	5.8	0.96	1.23
849	1,8-dimethylnaphthalene	000569-41-5	polyethylene	832727	5.9205	4897.79	3.69	0.93	5.88899	3.65848	774437	4554.94	5.68231	3.71831	20	293	(Choi, Cho, Luthy, 2013)	Water (Log)	cm^3/g	CC1=CC=CC2=C1C(=CC=C2)C	156.23	6.224	4.26	-1.964	-1.844	0.467	2.44	0.38739	-0.330683	69.0926	20	-89.0926	-2.2305	0	0.17	6.28	0.9	1.37
852	1,2-dimethylnaphthalene	000573-98-8	polyethylene	419469	5.6227	5248.07	3.72	0.93	5.59118	3.68848	390106	4880.71	5.38031	3.74831	20	293	(Choi, Cho, Luthy, 2013)	Water (Log)	cm^3/g	CC1=C(C2=CC=CC=C2C=C1)C	156.23	5.892	4.26	-1.632	-1.582	1.62	1.69	0.227887	0.209515	70.4955	20	-90.4955	-1.9027	0	0.17	6.28	0.9	1.37
850	1,4-dimethylnaphthalene	000571-58-4	polyethylene	926250	5.96673	6165.95	3.79	0.93	5.93521	3.75848	861412	5734.33	5.73031	3.81831	20	293	(Choi, Cho, Luthy, 2013)	Water (Log)	cm^3/g	CC1=CC=C(C2=CC=CC=C12)C	156.23	6.172	4.26	-1.912	-1.802	1.37	2.85	0.454845	0.136721	68.4992	20	-88.4992	-2.17673	0	0.17	6.28	0.9	1.37
853	1,3-dimethylnaphthalene	000575-41-7	polyethylene	735875	5.8668	6760.83	3.83	0.93	5.83529	3.79848	684364	6287.57	5.63131	3.85831	20	293	(Choi, Cho, Luthy, 2013)	Water (Log)	cm^3/g	CC1=CC2=CC=CC=C2C(=C1)C	156.23	6.033	4.26	-1.773	-1.613	1.8	3.09	0.489958	0.255273	68.1904	20	-88.1904	-2.0368	0	0.17	6.28	0.9	1.37
857	2,6-dimethylnaphthalene	000581-42-0	polyethylene	553496	5.74311	7079.46	3.85	0.93	5.7116	3.81848	514752	6583.9	5.51031	3.87831	20	293	(Choi, Cho, Luthy, 2013)	Water (Log)	cm^3/g	CC1=CC2=C(C=C1)C=C(C=C2)C	156.23	5.892	4.26	-1.632	-1.582	0.327	3.91	0.592177	-0.485452	67.2913	20	-87.2913	-1.89311	0	0.17	6.28	0.9	1.37
271	acenaphthene	000083-32-9	polyethylene	497946	5.69718	3388.44	3.53	0.93	5.66566	3.49848	463089	3151.25	5.45231	3.55831	20	293	(Choi, Cho, Luthy, 2013)	Water (Log)	cm^3/g	C1CC2=CC=CC3=C2C1=CC=C3	154.21	6.044	4.15	-1.894	-2.124	0.172	1.36	0.133539	-0.764472	71.3254	20	-91.3254	-2.16718	0	0.15	6.56	0.99	1.26
987	2,3,5-trimethylnaphthalene	002245-38-7	polyethylene	1.02806e+06	6.01202	15488.2	4.19	0.93	5.9805	4.15848	956097	14404	5.75731	4.21831	20	293	(Choi, Cho, Luthy, 2013)	Water (Log)	cm^3/g	CC1=CC=CC2=CC(=C(C=C12)C)C	170.26	6.349	4.81	-1.539	-1.539	0.299	0.575	-0.240332	-0.524329	74.6139	20	-94.6139	-1.82202	0	0.18	6.75	0.84	1.51
929	2,3,6-trimethylnaphthalene	000829-26-5	polyethylene	1.12384e+06	6.05071	20417.4	4.31	0.93	6.01919	4.27848	1.04518e+06	18988.2	5.79731	4.33831	20	293	(Choi, Cho, Luthy, 2013)	Water (Log)	cm^3/g	CC1=CC2=CC(=C(C=C2C=C1)C)C	170.26	6.269	4.81	-1.459	-1.539	0.336	0.645	-0.19044	-0.473661	74.1751	20	-94.1751	-1.74071	0	0.18	6.75	0.84	1.51
982	PCB-1	002051-60-7	polyethylene	862463	5.93574	7413.1	3.87	0.93	5.90422	3.83848	802090	6894.19	5.67031	3.89831	20	293	(Choi, Cho, Luthy, 2013)	Water (Log)	cm^3/g	C1=CC=C(C=C1)C2=CC=CC=C2Cl	188.66	6.172	4.4	-1.772	-1.522	0.85	0.225	-0.647817	-0.0705811	78.1981	20	-98.1981	-2.06574	0	0.21	6.93	1.24	1.45
983	PCB-3	002051-62-9	polyethylene	2.03631e+06	6.30884	16218.1	4.21	0.93	6.27733	4.17848	1.89376e+06	15082.8	6.07831	4.23831	20	293	(Choi, Cho, Luthy, 2013)	Water (Log)	cm^3/g	C1=CC=C(C=C1)C2=CC=C(C=C2)Cl	188.66	6.24	4.4	-1.84	-1.63	0.117	4.77	0.678518	-0.931814	66.5318	20	-86.5318	-2.09884	0	0.21	6.93	1.24	1.45
1288	d10-fluorene	081103-79-9	polyethylene	2.55374e+06	6.40718	3630.78	3.56	0.93	6.37566	3.52848	2.37498e+06	3376.63	6.15331	3.58831	20	293	(Choi, Cho, Luthy, 2013)	Water (Log)	cm^3/g	C1C2=CC=CC=C2C3=CC=CC=C31	166.22	6.585	4.02	-2.565	-2.405	0.044	0.619	-0.208309	-1.35655	74.3323	20	-94.3323	-2.84718	0	0.19	7.04	1.13	1.36
315	fluorene	000086-73-7	polyethylene	3.28985e+06	6.51718	4677.35	3.67	0.93	6.48566	3.63848	3.05956e+06	4349.94	6.26331	3.69831	20	293	(Choi, Cho, Luthy, 2013)	Water (Log)	cm^3/g	C1C2=CC=CC=C2C3=CC=CC=C31	166.22	6.585	4.02	-2.565	-2.405	0.044	0.619	-0.208309	-1.35655	74.3323	20	-94.3323	-2.84718	0	0.19	7.04	1.13	1.36
1041	1,4,6,7-tetramethylnaphthalene	013764-18-6	polyethylene	2.55223e+06	6.40692	41686.9	4.62	0.93	6.3754	4.58848	2.37357e+06	38768.9	6.14431	4.64831	20	293	(Choi, Cho, Luthy, 2013)	Water (Log)	cm^3/g	CC1=C2C=C(C(=CC2=C(C=C1)C)C)C	184.28	6.856	5.36	-1.496	-1.496	0.104	0.288	-0.540608	-0.982967	77.2551	20	-97.2551	-1.78692	0	0.18	7.22	0.79	1.65
1083	PCB-10	033146-45-1	polyethylene	2.52046e+06	6.40148	13803.8	4.14	0.93	6.36996	4.10848	2.34403e+06	12837.6	6.12531	4.16831	20	293	(Choi, Cho, Luthy, 2013)	Water (Log)	cm^3/g	C1=CC=C(C=C1)C2=C(C=CC=C2Cl)Cl	223.1	7.007	5.05	-1.957	-2.027	0.0254	0.0879	-1.05601	-1.59517	81.7885	20	-101.789	-2.26148	0	0.15	7.47	1.31	1.57
1098	PCB-9	034883-39-1	polyethylene	6.95596e+06	6.84236	37153.5	4.57	0.93	6.81084	4.53848	6.46905e+06	34552.8	6.58931	4.59831	20	293	(Choi, Cho, Luthy, 2013)	Water (Log)	cm^3/g	C1=CC=C(C=C1)C2=C(C=CC(=C2)Cl)Cl	223.1	7.041	5.05	-1.991	-1.941	0.0254	0.665	-0.177178	-1.59517	74.0584	20	-94.0584	-2.27236	0	0.2	7.47	1.35	1.57
1089	PCB-7	033284-50-3	polyethylene	7.98651e+06	6.90236	37153.5	4.57	0.93	6.87084	4.53848	7.42746e+06	34552.8	6.64931	4.59831	20	293	(Choi, Cho, Luthy, 2013)	Water (Log)	cm^3/g	C1=CC=C(C=C1)C2=C(C=C(C=C2)Cl)Cl	223.1	7.101	5.05	-2.051	-1.941	0.0254	0.665	-0.177178	-1.59517	74.0584	20	-94.0584	-2.33236	0	0.15	7.47	1.31	1.57
974	1-methylfluorene	001730-37-6	polyethylene	2.70304e+07	7.43185	14125.4	4.15	0.93	7.40034	4.11848	2.51383e+07	13136.6	7.16231	4.17831	20	293	(Choi, Cho, Luthy, 2013)	Water (Log)	cm^3/g	CC1=CC=CC2=C1CC3=CC=CC=C32	180.25	7.544	4.56	-2.984	-2.574	0.0471	0.157	-0.8041	-1.32698	79.5728	20	-99.5728	-3.28185	0	0.19	7.51	1.07	1.5
1038	PCB-4	013029-08-8	polyethylene	2.48699e+06	6.39567	13803.8	4.14	0.93	6.36416	4.10848	2.3129e+06	12837.6	6.14531	4.16831	20	293	(Choi, Cho, Luthy, 2013)	Water (Log)	cm^3/g	C1=CC=C(C(=C1)C2=CC=CC=C2Cl)Cl	223.1	7.027	5.05	-1.977	-2.027	0.0401	0.841	-0.075204	-1.39686	73.1615	20	-93.1615	-2.25567	0	0.21	7.56	1.32	1.57
1060	PCB-6	025569-80-6	polyethylene	4.73675e+06	6.67548	25704	4.41	0.93	6.64396	4.37848	4.40518e+06	23904.7	6.39931	4.43831	20	293	(Choi, Cho, Luthy, 2013)	Water (Log)	cm^3/g	C1=CC=C(C(=C1)C2=CC(=CC=C2)Cl)Cl	223.1	7.011	5.05	-1.961	-1.991	0.0254	0.0879	-1.05601	-1.59517	81.7885	20	-101.789	-2.26548	0	0.21	7.56	1.32	1.57
1100	PCB-8	034883-43-7	polyethylene	8.78177e+06	6.94358	39810.7	4.6	0.93	6.91206	4.56848	8.16704e+06	37024	6.69531	4.62831	20	293	(Choi, Cho, Luthy, 2013)	Water (Log)	cm^3/g	C1=CC=C(C(=C1)C2=CC=C(C=C2)Cl)Cl	223.1	7.117	5.05	-2.067	-2.027	0.0254	1.01	0.00432137	-1.59517	72.462	20	-92.462	-2.34358	0	0.21	7.56	1.32	1.57
1000	PCB-13	002974-90-5	polyethylene	1.40114e+07	7.14648	51286.1	4.71	0.93	7.11496	4.67848	1.30306e+07	47696.1	6.87031	4.73831	20	293	(Choi, Cho, Luthy, 2013)	Water (Log)	cm^3/g	C1=CC(=CC(=C1)Cl)C2=CC=C(C=C2)Cl	223.1	7.182	5.05	-2.132	-2.032	0.0254	0.0879	-1.05601	-1.59517	81.7885	20	-101.789	-2.43648	0	0.21	7.56	1.32	1.57
981	PCB-15	002050-68-2	polyethylene	3.12261e+07	7.49452	89125.1	4.95	0.93	7.463	4.91848	2.90402e+07	82886.3	7.24831	4.97831	20	293	(Choi, Cho, Luthy, 2013)	Water (Log)	cm^3/g	C1=CC(=CC=C1C2=CC=C(C=C2)Cl)Cl	223.1	7.32	5.05	-2.27	-2.09	0.00572	1.21	0.0827854	-2.2426	71.7718	20	-91.7718	-2.54452	0	0.21	7.56	1.32	1.57
1046	PCB-5	016605-91-7	polyethylene	7.9704e+06	6.90148	39810.7	4.6	0.93	6.86996	4.56848	7.41248e+06	37024	6.62531	4.62831	20	293	(Choi, Cho, Luthy, 2013)	Water (Log)	cm^3/g	C1=CC=C(C=C1)C2=C(C(=CC=C2)Cl)Cl	223.1	7.047	5.05	-1.997	-2.027	0.0254	0.0879	-1.05601	-1.59517	81.7885	20	-101.789	-2.30148	0	0.2	7.68	1.33	1.57
1001	PCB-12	002974-92-7	polyethylene	3.13675e+07	7.49648	51286.1	4.71	0.93	7.46496	4.67848	2.91718e+07	47696.1	7.22031	4.73831	20	293	(Choi, Cho, Luthy, 2013)	Water (Log)	cm^3/g	C1=CC=C(C=C1)C2=CC(=C(C=C2)Cl)Cl	223.1	7.532	5.05	-2.482	-2.242	0.0254	0.0879	-1.05601	-1.59517	81.7885	20	-101.789	-2.78648	0	0.2	7.68	1.33	1.57
307	Phenanthrene	000085-01-8	polyethylene	1.64639e+07	7.21653	10964.8	4.04	0.93	7.18502	4.00848	1.53114e+07	10197.2	6.94031	4.06831	20	293	(Choi, Cho, Luthy, 2013)	Water (Log)	cm^3/g	C1=CC=C2C(=C1)C=CC3=CC=CC=C32	178.24	7.222	4.35	-2.872	-2.762	0.00576	0.0875	-1.05799	-2.23958	81.806	20	-101.806	-3.17653	0	0.23	7.71	1.34	1.45
613	Anthracene	000120-12-7	polyethylene	1.58771e+07	7.20077	14125.4	4.15	0.93	7.16925	4.11848	1.47657e+07	13136.6	6.92131	4.17831	20	293	(Choi, Cho, Luthy, 2013)	Water (Log)	cm^3/g	C1=CC=C2C=C3C=CC=CC3=CC2=C1	178.24	7.093	4.35	-2.743	-2.643	0.000289	0.0659	-1.18111	-3.5391	82.8889	20	-102.889	-3.05077	0	0.23	7.71	1.34	1.45
1143	PCB-18	037680-65-2	polyethylene	9.34153e+06	6.97042	69183.1	4.84	0.93	6.9389	4.80848	8.68762e+06	64340.3	6.71931	4.86831	20	293	(Choi, Cho, Luthy, 2013)	Water (Log)	cm^3/g	C1=CC=C(C(=C1)C2=C(C=CC(=C2)Cl)Cl)Cl	257.55	7.541	5.69	-1.851	-1.991	0.00533	0.788	-0.103474	-2.27327	73.4101	20	-93.4101	-2.13042	0	0.19	8.1	1.43	1.69
1171	PCB-27	038444-76-7	polyethylene	2.13832e+07	7.33007	70794.6	4.85	0.93	7.29856	4.81848	1.98864e+07	65839	7.04131	4.87831	20	293	(Choi, Cho, Luthy, 2013)	Water (Log)	cm^3/g	C1=CC(=CC(=C1)Cl)C2=C(C=CC=C2Cl)Cl	257.55	7.853	5.69	-2.163	-2.163	0.00533	0.0292	-1.53462	-2.27327	85.9983	20	-105.998	-2.48007	0	0.15	8.1	1.39	1.69
1172	PCB-32	038444-77-8	polyethylene	2.47784e+07	7.39407	85113.8	4.93	0.93	7.36256	4.89848	2.30439e+07	79155.8	7.10531	4.95831	20	293	(Choi, Cho, Luthy, 2013)	Water (Log)	cm^3/g	C1=CC(=C(C(=C1)Cl)C2=CC=C(C=C2)Cl)Cl	257.55	7.837	5.69	-2.147	-2.087	0.00533	0.0292	-1.53462	-2.27327	85.9983	20	-105.998	-2.46407	0	0.15	8.1	1.39	1.69
1240	PCB-25	055712-37-3	polyethylene	2.69199e+07	7.43007	89125.1	4.95	0.93	7.39856	4.91848	2.50355e+07	82886.3	7.14131	4.97831	20	293	(Choi, Cho, Luthy, 2013)	Water (Log)	cm^3/g	C1=CC(=CC(=C1)Cl)C2=C(C=C(C=C2)Cl)Cl	257.55	7.853	5.69	-2.163	-2.163	0.00533	0.0292	-1.53462	-2.27327	85.9983	20	-105.998	-2.48007	0	0.15	8.1	1.39	1.69
1144	PCB-17	037680-66-3	polyethylene	3.16281e+07	7.50007	89125.1	4.95	0.93	7.46856	4.91848	2.94141e+07	82886.3	7.21131	4.97831	20	293	(Choi, Cho, Luthy, 2013)	Water (Log)	cm^3/g	C1=CC=C(C(=C1)C2=C(C=C(C=C2)Cl)Cl)Cl	257.55	7.923	5.69	-2.233	-2.163	0.00533	0.0292	-1.53462	-2.27327	85.9983	20	-105.998	-2.55007	0	0.15	8.1	1.39	1.69
1174	PCB-26	038444-81-4	polyethylene	4.40629e+07	7.64407	147911	5.17	0.93	7.61256	5.13848	4.09785e+07	137557	7.35531	5.19831	20	293	(Choi, Cho, Luthy, 2013)	Water (Log)	cm^3/g	C1=CC(=CC(=C1)Cl)C2=C(C=CC(=C2)Cl)Cl	257.55	7.847	5.69	-2.157	-2.087	0.00533	0.0292	-1.53462	-2.27327	85.9983	20	-105.998	-2.47407	0	0.19	8.1	1.43	1.69
1025	PCB-28	007012-37-5	polyethylene	3.69363e+07	7.56745	181970	5.26	0.93	7.53594	5.22848	3.43507e+07	169232	7.30531	5.28831	20	293	(Choi, Cho, Luthy, 2013)	Water (Log)	cm^3/g	C1=CC(=CC=C1C2=C(C=C(C=C2)Cl)Cl)Cl	257.55	7.707	5.69	-2.017	-2.087	0.00533	0.3	-0.522879	-2.27327	77.0992	20	-97.0992	-2.30745	0	0.15	8.1	1.39	1.69
1048	PCB-31	016606-02-3	polyethylene	4.57565e+07	7.66045	181970	5.26	0.93	7.62894	5.22848	4.25536e+07	169232	7.39831	5.28831	20	293	(Choi, Cho, Luthy, 2013)	Water (Log)	cm^3/g	C1=CC(=CC=C1C2=C(C=CC(=C2)Cl)Cl)Cl	257.55	7.8	5.69	-2.11	-2.11	0.00533	0.3	-0.522879	-2.27327	77.0992	20	-97.0992	-2.40045	0	0.19	8.1	1.43	1.69
1237	PCB-24	055702-45-9	polyethylene	1.52431e+07	7.18307	69183.1	4.84	0.93	7.15156	4.80848	1.41761e+07	64340.3	6.89431	4.86831	20	293	(Choi, Cho, Luthy, 2013)	Water (Log)	cm^3/g	C1=CC=C(C=C1)C2=C(C=CC(=C2Cl)Cl)Cl	257.55	7.716	5.69	-2.026	-2.046	0.00533	0.0292	-1.53462	-2.27327	85.9983	20	-105.998	-2.34307	0	0.13	8.13	1.42	1.69
1044	PCB-29	015862-07-4	polyethylene	5.29219e+07	7.72364	169824	5.23	0.93	7.69212	5.19848	4.92174e+07	157937	7.46531	5.25831	20	293	(Choi, Cho, Luthy, 2013)	Water (Log)	cm^3/g	C1=CC=C(C=C1)C2=CC(=C(C=C2Cl)Cl)Cl	257.55	7.897	5.69	-2.207	-2.087	0.00952	0.419	-0.377786	-2.02136	75.823	20	-95.823	-2.49364	0	0.13	8.13	1.42	1.69
880	2-methylanthracene	000613-12-7	polyethylene	4.5458e+06	6.65761	44668.4	4.65	0.93	6.62609	4.61848	4.22759e+06	41541.6	6.37431	4.67831	20	293	(Choi, Cho, Luthy, 2013)	Water (Log)	cm^3/g	CC1=CC2=CC3=CC=CC=C3C=C2C=C1	192.26	6.586	4.89	-1.696	-1.586	0.000343	0.0471	-1.32698	-3.46471	84.1719	20	-104.172	-2.00761	0	0.23	8.18	1.28	1.6
930	1-methylphenanthrene	000832-69-9	polyethylene	7.21382e+07	7.85817	44668.4	4.65	0.93	7.82665	4.61848	6.70885e+07	41541.6	7.56431	4.67831	20	293	(Choi, Cho, Luthy, 2013)	Water (Log)	cm^3/g	CC1=CC=CC2=C1C=CC3=CC=CC=C32	192.26	7.776	4.89	-2.886	-2.696	0.00326	0.0187	-1.72816	-2.48678	87.7007	20	-107.701	-3.20817	0	0.23	8.18	1.28	1.6
992	2-methylphenanthrene	002531-84-2	polyethylene	3.96149e+07	7.59786	46773.5	4.67	0.93	7.56634	4.63848	3.68418e+07	43499.4	7.30331	4.69831	20	293	(Choi, Cho, Luthy, 2013)	Water (Log)	cm^3/g	CC1=CC2=C(C=C1)C3=CC=CC=C3C=C2	192.26	7.495	4.89	-2.605	-2.635	0.00889	0.0176	-1.75449	-2.0511	87.9323	20	-107.932	-2.92786	0	0.23	8.18	1.28	1.6
922	9-methylanthracene	000779-02-2	polyethylene	1.26417e+08	8.1018	63095.7	4.8	0.93	8.07029	4.76848	1.17568e+08	58679	7.80831	4.82831	20	293	(Choi, Cho, Luthy, 2013)	Water (Log)	cm^3/g	CC1=C2C=CC=CC2=CC3=CC=CC=C13	192.26	7.87	4.89	-2.98	-2.8	0.00889	0.0193	-1.71444	-2.0511	87.58	20	-107.58	-3.3018	0	0.23	8.18	1.28	1.6
1239	PCB-21	055702-46-0	polyethylene	6.45763e+07	7.81007	144544	5.16	0.93	7.77856	5.12848	6.00559e+07	134426	7.52131	5.18831	20	293	(Choi, Cho, Luthy, 2013)	Water (Log)	cm^3/g	C1=CC=C(C=C1)C2=C(C(=C(C=C2)Cl)Cl)Cl	257.55	8.023	5.69	-2.333	-2.163	0.00533	0.0292	-1.53462	-2.27327	85.9983	20	-105.998	-2.65007	0	0.13	8.27	1.39	1.69
1173	PCB-16	038444-78-9	polyethylene	5.54719e+06	6.74407	52480.7	4.72	0.93	6.71256	4.68848	5.15889e+06	48807.1	6.45531	4.74831	20	293	(Choi, Cho, Luthy, 2013)	Water (Log)	cm^3/g	C1=CC=C(C(=C1)C2=C(C(=CC=C2)Cl)Cl)Cl	257.55	7.397	5.69	-1.707	-2.087	0.00533	0.0292	-1.53462	-2.27327	85.9983	20	-105.998	-2.02407	0	0.19	8.31	1.41	1.69
1175	PCB-22	038444-85-8	polyethylene	2.62466e+07	7.41907	134896	5.13	0.93	7.38756	5.09848	2.44093e+07	125454	7.13031	5.15831	20	293	(Choi, Cho, Luthy, 2013)	Water (Log)	cm^3/g	C1=CC(=C(C(=C1)Cl)Cl)C2=CC=C(C=C2)Cl	257.55	7.662	5.69	-1.972	-2.242	0.00533	0.0292	-1.53462	-2.27327	85.9983	20	-105.998	-2.28907	0	0.19	8.31	1.41	1.69
1176	PCB-33	038444-86-9	polyethylene	6.76026e+07	7.82996	144544	5.16	0.93	7.79845	5.12848	6.28704e+07	134426	7.55231	5.18831	20	293	(Choi, Cho, Luthy, 2013)	Water (Log)	cm^3/g	C1=CC=C(C(=C1)C2=CC(=C(C=C2)Cl)Cl)Cl	257.55	8.054	5.69	-2.364	-2.184	0.00533	0.0772	-1.11238	-2.27327	82.2844	20	-102.284	-2.66996	0	0.19	8.31	1.41	1.69
1177	PCB-37	038444-90-5	polyethylene	2.21347e+08	8.34507	269153	5.43	0.93	8.31356	5.39848	2.05852e+08	250313	8.05631	5.45831	20	293	(Choi, Cho, Luthy, 2013)	Water (Log)	cm^3/g	C1=CC(=CC=C1C2=CC(=C(C=C2)Cl)Cl)Cl	257.55	8.288	5.69	-2.598	-2.388	0.00533	0.0292	-1.53462	-2.27327	85.9983	20	-105.998	-2.91507	0	0.19	8.31	1.41	1.69
1258	PCB-51	068194-04-7	polyethylene	8.52629e+07	7.93076	229087	5.36	0.93	7.89924	5.32848	7.92945e+07	213051	7.63031	5.38831	20	293	(Choi, Cho, Luthy, 2013)	Water (Log)	cm^3/g	C1=CC(=C(C(=C1)Cl)C2=C(C=C(C=C2)Cl)Cl)Cl	291.99	8.582	6.34	-2.242	-2.242	0.00113	0.0105	-1.97881	-2.94692	89.9054	20	-109.905	-2.57076	0	0.09	8.63	1.46	1.81
990	PCB-47	002437-79-8	polyethylene	9.38298e+07	7.97234	407380	5.61	0.93	7.94082	5.57848	8.72617e+07	378864	7.69831	5.63831	20	293	(Choi, Cho, Luthy, 2013)	Water (Log)	cm^3/g	C1=CC(=C(C=C1Cl)Cl)C2=C(C=C(C=C2)Cl)Cl	291.99	8.4	6.34	-2.06	-2.11	0.00113	0.106	-0.974694	-2.94692	81.0733	20	-101.073	-2.36234	0	0.09	8.63	1.46	1.81
1190	PCB-53	041464-41-9	polyethylene	4.03421e+07	7.60576	144544	5.16	0.93	7.57424	5.12848	3.75181e+07	134426	7.31631	5.18831	20	293	(Choi, Cho, Luthy, 2013)	Water (Log)	cm^3/g	C1=CC(=C(C(=C1)Cl)C2=C(C=CC(=C2)Cl)Cl)Cl	291.99	8.468	6.34	-2.128	-2.128	0.00113	0.0275	-1.56067	-2.94692	86.2274	20	-106.227	-2.44576	0	0.13	8.64	1.5	1.81
1133	PCB-52	035693-99-3	polyethylene	3.9424e+07	7.59576	269153	5.43	0.93	7.56424	5.39848	3.66643e+07	250313	7.29531	5.45831	20	293	(Choi, Cho, Luthy, 2013)	Water (Log)	cm^3/g	C1=CC(=C(C=C1Cl)C2=C(C=CC(=C2)Cl)Cl)Cl	291.99	8.177	6.34	-1.837	-2.087	0.00113	0.0105	-1.97881	-2.94692	89.9054	20	-109.905	-2.16576	0	0.18	8.64	1.55	1.81
1189	PCB-49	041464-40-8	polyethylene	5.06839e+07	7.70487	269153	5.43	0.93	7.67335	5.39848	4.7136e+07	250313	7.40431	5.45831	20	293	(Choi, Cho, Luthy, 2013)	Water (Log)	cm^3/g	C1=CC(=C(C=C1Cl)Cl)C2=C(C=CC(=C2)Cl)Cl	291.99	8.286	6.34	-1.946	-2.066	0.00113	0.0104	-1.98297	-2.94692	89.9419	20	-109.942	-2.27487	0	0.13	8.64	1.5	1.81
970	3,6-dimethylphenanthrene	001576-67-6	polyethylene	9.4784e+07	7.97673	114815	5.06	0.93	7.94522	5.02848	8.81491e+07	106778	7.68131	5.08831	20	293	(Choi, Cho, Luthy, 2013)	Water (Log)	cm^3/g	CC1=CC2=C(C=C1)C=CC3=C2C=C(C=C3)C	206.29	8.033	5.44	-2.593	-2.593	0.00101	0.0163	-1.78781	-2.99568	88.2254	20	-108.225	-2.91673	0	0.23	8.65	1.22	1.74
924	9,10-dimethylanthracene	000781-43-1	polyethylene	2.32667e+08	8.36673	158489	5.2	0.93	8.33522	5.16848	2.1638e+08	147395	8.07131	5.22831	20	293	(Choi, Cho, Luthy, 2013)	Water (Log)	cm^3/g	CC1=C2C=CC=CC2=C(C3=CC=CC=C13)C	206.29	8.283	5.44	-2.843	-2.593	0.000365	0.0163	-1.78781	-3.43771	88.2254	20	-108.225	-3.16673	0	0.23	8.65	1.22	1.74
1202	2-ethylanthracene	052251-71-5	polyethylene	5.1248e+08	8.70968	177828	5.25	0.93	8.67816	5.21848	4.76606e+08	165380	8.41131	5.27831	20	293	(Choi, Cho, Luthy, 2013)	Water (Log)	cm^3/g	CCC1=CC2=CC3=CC=CC=C3C=C2C=C1	206.29	8.513	5.38	-3.133	-2.663	0.000823	0.0126	-1.89963	-3.0846	89.2089	20	-109.209	-3.45968	0	0.24	8.67	1.29	1.74
1252	PCB-69	060233-24-1	polyethylene	1.08333e+08	8.03476	436516	5.64	0.93	8.00324	5.60848	1.0075e+08	405960	7.73431	5.66831	20	293	(Choi, Cho, Luthy, 2013)	Water (Log)	cm^3/g	C1=CC(=CC(=C1)Cl)C2=C(C=C(C=C2Cl)Cl)Cl	291.99	8.406	6.34	-2.066	-2.066	0.00113	0.0105	-1.97881	-2.94692	89.9054	20	-109.905	-2.39476	0	0.12	8.68	1.46	1.81
1264	PCB-45	070362-45-7	polyethylene	6.32063e+07	7.80076	151356	5.18	0.93	7.76924	5.14848	5.87818e+07	140761	7.50031	5.20831	20	293	(Choi, Cho, Luthy, 2013)	Water (Log)	cm^3/g	C1=CC=C(C(=C1)C2=C(C=CC(=C2Cl)Cl)Cl)Cl	291.99	8.632	6.34	-2.292	-2.292	0.00113	0.0105	-1.97881	-2.94692	89.9054	20	-109.905	-2.62076	0	0.12	8.76	1.5	1.81
1203	PCB-64	052663-58-8	polyethylene	1.29051e+08	8.11076	346737	5.54	0.93	8.07924	5.50848	1.20017e+08	322465	7.81031	5.56831	20	293	(Choi, Cho, Luthy, 2013)	Water (Log)	cm^3/g	C1=CC(=CC=C1C2=C(C=CC(=C2Cl)Cl)Cl)Cl	291.99	8.582	6.34	-2.242	-2.242	0.00113	0.0105	-1.97881	-2.94692	89.9054	20	-109.905	-2.57076	0	0.12	8.76	1.5	1.81
1266	PCB-43	070362-46-8	polyethylene	1.4817e+08	8.17076	354813	5.55	0.93	8.13924	5.51848	1.37798e+08	329976	7.87031	5.57831	20	293	(Choi, Cho, Luthy, 2013)	Water (Log)	cm^3/g	C1=CC=C(C(=C1)C2=CC(=CC(=C2Cl)Cl)Cl)Cl	291.99	8.632	6.34	-2.292	-2.292	0.00113	0.0105	-1.97881	-2.94692	89.9054	20	-109.905	-2.62076	0	0.12	8.76	1.5	1.81
1267	PCB-48	070362-47-9	polyethylene	1.70122e+08	8.23076	407380	5.61	0.93	8.19924	5.57848	1.58213e+08	378864	7.93031	5.63831	20	293	(Choi, Cho, Luthy, 2013)	Water (Log)	cm^3/g	C1=CC=C(C(=C1)C2=CC(=C(C=C2Cl)Cl)Cl)Cl	291.99	8.632	6.34	-2.292	-2.292	0.00113	0.0105	-1.97881	-2.94692	89.9054	20	-109.905	-2.62076	0	0.12	8.76	1.5	1.81
1078	PCB-74	032690-93-0	polyethylene	4.53691e+08	8.65676	407380	5.61	0.93	8.62524	5.57848	4.21933e+08	378864	8.35631	5.63831	20	293	(Choi, Cho, Luthy, 2013)	Water (Log)	cm^3/g	C1=CC(=CC=C1C2=CC(=C(C=C2Cl)Cl)Cl)Cl	291.99	9.058	6.34	-2.718	-2.388	0.00113	0.0105	-1.97881	-2.94692	89.9054	20	-109.905	-3.04676	0	0.12	8.76	1.5	1.81
1277	PCB-63	074472-34-7	polyethylene	2.45901e+08	8.39076	588844	5.77	0.93	8.35924	5.73848	2.28688e+08	547625	8.09031	5.79831	20	293	(Choi, Cho, Luthy, 2013)	Water (Log)	cm^3/g	C1=CC(=CC=C1C2=CC(=CC(=C2Cl)Cl)Cl)Cl	291.99	8.632	6.34	-2.292	-2.292	0.00113	0.0105	-1.97881	-2.94692	89.9054	20	-109.905	-2.62076	0	0.12	8.76	1.5	1.81
1194	PCB-46	041464-47-5	polyethylene	5.25727e+07	7.72076	125893	5.1	0.93	7.68924	5.06848	4.88926e+07	117080	7.42031	5.12831	20	293	(Choi, Cho, Luthy, 2013)	Water (Log)	cm^3/g	C1=CC(=C(C(=C1)Cl)Cl)C2=C(C=CC=C2Cl)Cl	291.99	8.632	6.34	-2.292	-2.292	0.00113	0.0105	-1.97881	-2.94692	89.9054	20	-109.905	-2.62076	0	0.13	8.84	1.47	1.81
1140	PCB-42	036559-22-5	polyethylene	8.14255e+07	7.91076	218776	5.34	0.93	7.87924	5.30848	7.57257e+07	203462	7.61031	5.36831	20	293	(Choi, Cho, Luthy, 2013)	Water (Log)	cm^3/g	C1=CC(=C(C(=C1)Cl)Cl)C2=C(C=C(C=C2)Cl)Cl	291.99	8.582	6.34	-2.242	-2.242	0.00113	0.0105	-1.97881	-2.94692	89.9054	20	-109.905	-2.57076	0	0.13	8.84	1.47	1.81
1193	PCB-71	041464-46-4	polyethylene	1.12398e+08	8.05076	269153	5.43	0.93	8.01924	5.39848	1.04531e+08	250313	7.75031	5.45831	20	293	(Choi, Cho, Luthy, 2013)	Water (Log)	cm^3/g	C1=CC(=C(C(=C1)Cl)C2=CC(=C(C=C2)Cl)Cl)Cl	291.99	8.632	6.34	-2.292	-2.292	0.00113	0.0105	-1.97881	-2.94692	89.9054	20	-109.905	-2.62076	0	0.13	8.84	1.47	1.81
1070	PCB-66	032598-10-0	polyethylene	3.377e+08	8.52853	870964	5.94	0.93	8.49701	5.90848	3.14061e+08	809996	8.24731	5.96831	20	293	(Choi, Cho, Luthy, 2013)	Water (Log)	cm^3/g	C1=CC(=C(C=C1C2=C(C=C(C=C2)Cl)Cl)Cl)Cl	291.99	8.619	6.34	-2.279	-2.309	0.00113	0.0565	-1.24795	-2.94692	83.4768	20	-103.477	-2.58853	0	0.13	8.84	1.47	1.81
1187	PCB-44	041464-39-5	polyethylene	2.5749e+07	7.41076	234423	5.37	0.93	7.37924	5.33848	2.39466e+07	218013	7.11031	5.39831	20	293	(Choi, Cho, Luthy, 2013)	Water (Log)	cm^3/g	C1=CC(=C(C(=C1)Cl)Cl)C2=C(C=CC(=C2)Cl)Cl	291.99	8.052	6.34	-1.712	-2.242	0.00113	0.0105	-1.97881	-2.94692	89.9054	20	-109.905	-2.04076	0	0.18	8.85	1.52	1.81
1071	PCB-70	032598-11-1	polyethylene	2.25528e+08	8.3532	575440	5.76	0.93	8.32168	5.72848	2.09741e+08	535159	8.06631	5.78831	20	293	(Choi, Cho, Luthy, 2013)	Water (Log)	cm^3/g	C1=CC(=C(C=C1C2=C(C=CC(=C2)Cl)Cl)Cl)Cl	291.99	8.618	6.34	-2.278	-2.388	0.00168	0.0344	-1.46344	-2.77469	85.3722	20	-105.372	-2.5932	0	0.18	8.85	1.52	1.81
1204	PCB-41	052663-59-9	polyethylene	6.46785e+07	7.81076	295121	5.47	0.93	7.77924	5.43848	6.01511e+07	274462	7.51031	5.49831	20	293	(Choi, Cho, Luthy, 2013)	Water (Log)	cm^3/g	C1=CC=C(C(=C1)C2=C(C(=C(C=C2)Cl)Cl)Cl)Cl	291.99	8.352	6.34	-2.012	-2.242	0.00113	0.0105	-1.97881	-2.94692	89.9054	20	-109.905	-2.34076	0	0.13	8.9	1.47	1.81
1268	PCB-76	070362-48-0	polyethylene	2.40304e+08	8.38076	575440	5.76	0.93	8.34924	5.72848	2.23482e+08	535159	8.08031	5.78831	20	293	(Choi, Cho, Luthy, 2013)	Water (Log)	cm^3/g	C1=CC=C(C(=C1)C2=CC(=C(C(=C2)Cl)Cl)Cl)Cl	291.99	8.632	6.34	-2.292	-2.292	0.00113	0.0105	-1.97881	-2.94692	89.9054	20	-109.905	-2.62076	0	0.13	8.9	1.47	1.81
1080	PCB-60	033025-41-1	polyethylene	8.14255e+07	7.91076	616595	5.79	0.93	7.87924	5.75848	7.57257e+07	573433	7.61031	5.81831	20	293	(Choi, Cho, Luthy, 2013)	Water (Log)	cm^3/g	C1=CC(=CC=C1C2=C(C(=C(C=C2)Cl)Cl)Cl)Cl	291.99	8.132	6.34	-1.792	-2.292	0.00113	0.0105	-1.97881	-2.94692	89.9054	20	-109.905	-2.12076	0	0.13	8.9	1.47	1.81
1270	PCB-81	070362-50-4	polyethylene	3.72186e+08	8.57076	891251	5.95	0.93	8.53924	5.91848	3.46133e+08	828863	8.27031	5.97831	20	293	(Choi, Cho, Luthy, 2013)	Water (Log)	cm^3/g	C1=CC(=CC=C1C2=CC(=C(C(=C2)Cl)Cl)Cl)Cl	291.99	8.632	6.34	-2.292	-2.292	0.00113	0.0105	-1.97881	-2.94692	89.9054	20	-109.905	-2.62076	0	0.13	8.9	1.47	1.81
1178	PCB-40	038444-93-8	polyethylene	5.65228e+07	7.75222	165959	5.22	0.93	7.72071	5.18848	5.25662e+07	154342	7.47631	5.24831	20	293	(Choi, Cho, Luthy, 2013)	Water (Log)	cm^3/g	C1=CC(=C(C(=C1)Cl)Cl)C2=C(C(=CC=C2)Cl)Cl	291.99	8.568	6.34	-2.228	-2.388	0.00113	0.0899	-1.04624	-2.94692	81.7026	20	-101.703	-2.53222	0	0.18	9.05	1.49	1.81
1192	PCB-56	041464-43-1	polyethylene	1.9088e+08	8.28076	457088	5.66	0.93	8.24924	5.62848	1.77518e+08	425092	7.98031	5.68831	20	293	(Choi, Cho, Luthy, 2013)	Water (Log)	cm^3/g	C1=CC(=C(C(=C1)Cl)Cl)C2=CC(=C(C=C2)Cl)Cl	291.99	8.632	6.34	-2.292	-2.292	0.00113	0.0105	-1.97881	-2.94692	89.9054	20	-109.905	-2.62076	0	0.18	9.05	1.49	1.81
1072	PCB-77	032598-13-3	polyethylene	6.55235e+09	9.8164	616595	5.79	0.93	9.78488	5.75848	6.09369e+09	573433	9.52331	5.81831	20	293	(Choi, Cho, Luthy, 2013)	Water (Log)	cm^3/g	C1=CC(=C(C=C1C2=CC(=C(C=C2)Cl)Cl)Cl)Cl	291.99	10.045	6.34	-3.705	-3.415	0.00113	0.02	-1.69897	-2.94692	87.4439	20	-107.444	-4.0264	0	0.18	9.05	1.49	1.81
1289	d10-fluoranthene	093951-69-0	polyethylene	4.3925e+08	8.64271	43651.6	4.64	0.93	8.61119	4.60848	4.08502e+08	40596	8.33931	4.66831	20	293	(Choi, Cho, Luthy, 2013)	Water (Log)	cm^3/g	C1=CC=C2C(=C1)C3=CC=CC4=C3C2=CC=C4	202.26	8.601	4.93	-3.671	-3.441	0.000417	0.00811	-2.09098	-3.37986	90.892	20	-110.892	-4.00271	0	0.25	9.11	1.52	1.58
749	fluoranthene	000206-44-0	polyethylene	5.65863e+08	8.75271	56234.1	4.75	0.93	8.72119	4.71848	5.26253e+08	52297.7	8.44931	4.77831	20	293	(Choi, Cho, Luthy, 2013)	Water (Log)	cm^3/g	C1=CC=C2C(=C1)C3=CC=CC4=C3C2=CC=C4	202.26	8.601	4.93	-3.671	-3.441	0.000417	0.00811	-2.09098	-3.37986	90.892	20	-110.892	-4.00271	0	0.25	9.11	1.52	1.58
690	Pyrene	000129-00-0	polyethylene	3.03146e+08	8.48165	77624.7	4.89	0.93	8.45013	4.85848	2.81926e+08	72191	8.18131	4.91831	20	293	(Choi, Cho, Luthy, 2013)	Water (Log)	cm^3/g	C1=CC2=C3C(=C1)C=CC4=CC=CC(=C43)C=C2	202.26	8.193	4.93	-3.263	-3.313	4.59e-05	0.0106	-1.97469	-4.33819	89.8692	20	-109.869	-3.59165	0	0.25	9.11	1.52	1.58
1179	PCB-100	039485-83-1	polyethylene	4.30117e+08	8.63359	741310	5.87	0.93	8.60207	5.83848	4.00009e+08	689419	8.32131	5.89831	20	293	(Choi, Cho, Luthy, 2013)	Water (Log)	cm^3/g	C1=CC(=C(C=C1Cl)Cl)C2=C(C=C(C=C2Cl)Cl)Cl	326.44	9.403	6.98	-2.423	-2.423	0.000295	0.00373	-2.42829	-3.53018	93.8589	20	-113.859	-2.76359	0	0.06	9.22	1.53	1.94
1247	PCB-103	060145-21-3	polyethylene	1.13132e+09	9.05359	1.94984e+06	6.29	0.93	9.02207	6.25848	1.05213e+09	1.81336e+06	8.74131	6.31831	20	293	(Choi, Cho, Luthy, 2013)	Water (Log)	cm^3/g	C1=CC(=C(C=C1Cl)C2=C(C=C(C=C2Cl)Cl)Cl)Cl	326.44	9.403	6.98	-2.423	-2.423	0.000295	0.00373	-2.42829	-3.53018	93.8589	20	-113.859	-2.76359	0	0.1	9.22	1.57	1.94
1259	PCB-91	068194-05-8	polyethylene	5.17114e+08	8.71359	891251	5.95	0.93	8.68207	5.91848	4.80916e+08	828863	8.40131	5.97831	20	293	(Choi, Cho, Luthy, 2013)	Water (Log)	cm^3/g	C1=CC(=C(C=C1Cl)Cl)C2=C(C=CC(=C2Cl)Cl)Cl	326.44	9.403	6.98	-2.423	-2.423	0.000295	0.00373	-2.42829	-3.53018	93.8589	20	-113.859	-2.76359	0	0.07	9.29	1.57	1.94
1154	PCB-99	038380-01-7	polyethylene	1.66268e+09	9.22081	1.51356e+06	6.18	0.93	9.18929	6.14848	1.54629e+09	1.40761e+06	8.93431	6.20831	20	293	(Choi, Cho, Luthy, 2013)	Water (Log)	cm^3/g	C1=CC(=C(C=C1Cl)Cl)C2=CC(=C(C=C2Cl)Cl)Cl	326.44	9.706	6.98	-2.726	-2.496	0.000295	0.0356	-1.44855	-3.53018	85.2413	20	-105.241	-3.04081	0	0.07	9.29	1.57	1.94
1274	PCB-96	073575-54-9	polyethylene	1.42425e+10	10.1536	2.45471e+07	7.39	0.93	10.1221	7.35848	1.32455e+10	2.28288e+07	9.84131	7.41831	20	293	(Choi, Cho, Luthy, 2013)	Water (Log)	cm^3/g	C1=CC(=C(C(=C1)Cl)C2=C(C=CC(=C2Cl)Cl)Cl)Cl	326.44	9.403	6.98	-2.423	-2.423	0.000295	0.00373	-2.42829	-3.53018	93.8589	20	-113.859	-2.76359	0	0.07	9.29	1.57	1.94
1206	PCB-92	052663-61-3	polyethylene	2.25729e+08	8.35359	602560	5.78	0.93	8.32207	5.74848	2.09928e+08	560380	8.04131	5.80831	20	293	(Choi, Cho, Luthy, 2013)	Water (Log)	cm^3/g	C1=CC(=C(C=C1Cl)C2=CC(=CC(=C2Cl)Cl)Cl)Cl	326.44	9.213	6.98	-2.233	-2.423	0.000295	0.00373	-2.42829	-3.53018	93.8589	20	-113.859	-2.57359	0	0.11	9.3	1.61	1.94
1152	PCB-95	038379-99-6	polyethylene	1.44406e+08	8.15959	870964	5.94	0.93	8.12807	5.90848	1.34298e+08	809996	7.84731	5.96831	20	293	(Choi, Cho, Luthy, 2013)	Water (Log)	cm^3/g	C1=CC(=C(C=C1Cl)C2=C(C=CC(=C2Cl)Cl)Cl)Cl	326.44	8.859	6.98	-1.879	-2.309	0.000295	0.00373	-2.42829	-3.53018	93.8589	20	-113.859	-2.21959	0	0.11	9.3	1.61	1.94
1151	PCB-101	037680-73-2	polyethylene	5.71809e+08	8.75725	1.54882e+06	6.19	0.93	8.72573	6.15848	5.31782e+08	1.4404e+06	8.47231	6.21831	20	293	(Choi, Cho, Luthy, 2013)	Water (Log)	cm^3/g	C1=CC(=C(C=C1Cl)C2=CC(=C(C=C2Cl)Cl)Cl)Cl	326.44	9.234	6.98	-2.254	-2.434	0.000295	0.0408	-1.38934	-3.53018	84.7205	20	-104.72	-2.56725	0	0.11	9.3	1.61	1.94
1281	PCB-114	074472-37-0	polyethylene	9.19574e+08	8.96359	1.58489e+06	6.2	0.93	8.93207	6.16848	8.55204e+08	1.47395e+06	8.65131	6.22831	20	293	(Choi, Cho, Luthy, 2013)	Water (Log)	cm^3/g	C1=CC(=CC=C1C2=CC(=C(C(=C2Cl)Cl)Cl)Cl)Cl	326.44	9.403	6.98	-2.423	-2.423	0.000729	0.00373	-2.42829	-3.13727	93.8589	20	-113.859	-2.76359	0	0.05	9.41	1.57	1.94
1242	PCB-119	056558-17-9	polyethylene	6.16008e+08	8.78959	851138	5.93	0.93	8.75807	5.89848	5.72888e+08	791558	8.47731	5.95831	20	293	(Choi, Cho, Luthy, 2013)	Water (Log)	cm^3/g	C1=CC(=C(C=C1C2=C(C=C(C=C2Cl)Cl)Cl)Cl)Cl	326.44	9.499	6.98	-2.519	-2.519	0.000295	0.00373	-2.42829	-3.53018	93.8589	20	-113.859	-2.85959	0	0.1	9.43	1.54	1.94
1156	PCB-87	038380-02-8	polyethylene	6.1201e+08	8.78676	1.20226e+06	6.08	0.93	8.75524	6.04848	5.69169e+08	1.11811e+06	8.49731	6.10831	20	293	(Choi, Cho, Luthy, 2013)	Water (Log)	cm^3/g	C1=CC(=C(C=C1Cl)C2=C(C(=C(C=C2)Cl)Cl)Cl)Cl	326.44	9.369	6.98	-2.389	-2.519	0.000295	0.0275	-1.56067	-3.53018	86.2274	20	-106.227	-2.70676	0	0.12	9.44	1.58	1.94
1275	PCB-89	073575-57-2	polyethylene	6.97568e+08	8.84359	1.20226e+06	6.08	0.93	8.81207	6.04848	6.48738e+08	1.11811e+06	8.53131	6.10831	20	293	(Choi, Cho, Luthy, 2013)	Water (Log)	cm^3/g	C1=CC(=C(C(=C1)Cl)C2=C(C(=C(C=C2)Cl)Cl)Cl)Cl	326.44	9.403	6.98	-2.423	-2.423	0.000295	0.00373	-2.42829	-3.53018	93.8589	20	-113.859	-2.76359	0	0.07	9.44	1.54	1.94
1257	PCB-85	065510-45-4	polyethylene	5.49018e+08	8.73959	1.58489e+06	6.2	0.93	8.70807	6.16848	5.10587e+08	1.47395e+06	8.42731	6.22831	20	293	(Choi, Cho, Luthy, 2013)	Water (Log)	cm^3/g	C1=CC(=C(C=C1Cl)Cl)C2=C(C(=C(C=C2)Cl)Cl)Cl	326.44	9.179	6.98	-2.199	-2.569	0.000295	0.00373	-2.42829	-3.53018	93.8589	20	-113.859	-2.53959	0	0.07	9.44	1.54	1.94
1255	PCB-123	065510-44-3	polyethylene	1.87753e+09	9.27359	3.23594e+06	6.51	0.93	9.24207	6.47848	1.7461e+09	3.00942e+06	8.96131	6.53831	20	293	(Choi, Cho, Luthy, 2013)	Water (Log)	cm^3/g	C1=CC(=C(C=C1Cl)Cl)C2=CC(=C(C(=C2)Cl)Cl)Cl	326.44	9.403	6.98	-2.423	-2.423	0.000295	0.00373	-2.42829	-3.53018	93.8589	20	-113.859	-2.76359	0	0.07	9.44	1.54	1.94
1273	PCB-124	070424-70-3	polyethylene	2.25729e+09	9.35359	3.89045e+06	6.59	0.93	9.32207	6.55848	2.09928e+09	3.61812e+06	9.04131	6.61831	20	293	(Choi, Cho, Luthy, 2013)	Water (Log)	cm^3/g	C1=CC(=C(C=C1Cl)C2=CC(=C(C(=C2)Cl)Cl)Cl)Cl	326.44	9.403	6.98	-2.423	-2.423	0.000615	0.00373	-2.42829	-3.21112	93.8589	20	-113.859	-2.76359	0	0.12	9.44	1.58	1.94
1205	PCB-84	052663-60-2	polyethylene	4.01409e+07	7.60359	602560	5.78	0.93	7.57207	5.74848	3.7331e+07	560380	7.29131	5.80831	20	293	(Choi, Cho, Luthy, 2013)	Water (Log)	cm^3/g	C1=CC(=C(C(=C1)Cl)Cl)C2=C(C=CC(=C2Cl)Cl)Cl	326.44	8.463	6.98	-1.483	-2.423	0.000295	0.00373	-2.42829	-3.53018	93.8589	20	-113.859	-1.82359	0	0.11	9.5	1.59	1.94
1246	PCB-83	060145-20-2	polyethylene	5.80212e+08	8.76359	1000000	6	0.93	8.73207	5.96848	5.39597e+08	930000	8.45131	6.02831	20	293	(Choi, Cho, Luthy, 2013)	Water (Log)	cm^3/g	C1=CC(=C(C(=C1)Cl)Cl)C2=CC(=CC(=C2Cl)Cl)Cl	326.44	9.403	6.98	-2.423	-2.423	0.000295	0.00373	-2.42829	-3.53018	93.8589	20	-113.859	-2.76359	0	0.11	9.5	1.59	1.94
1158	PCB-110	038380-03-9	polyethylene	1.18464e+08	8.07359	1.1749e+06	6.07	0.93	8.04207	6.03848	1.10172e+08	1.09265e+06	7.76131	6.09831	20	293	(Choi, Cho, Luthy, 2013)	Water (Log)	cm^3/g	C1=CC(=C(C=C1C2=C(C=CC(=C2Cl)Cl)Cl)Cl)Cl	326.44	8.643	6.98	-1.663	-2.423	0.000295	0.00373	-2.42829	-3.53018	93.8589	20	-113.859	-2.00359	0	0.11	9.5	1.59	1.94
1197	PCB-97	041464-51-1	polyethylene	4.36101e+08	8.63959	1.23027e+06	6.09	0.93	8.60807	6.05848	4.05573e+08	1.14415e+06	8.32731	6.11831	20	293	(Choi, Cho, Luthy, 2013)	Water (Log)	cm^3/g	C1=CC(=C(C(=C1)Cl)Cl)C2=CC(=C(C=C2Cl)Cl)Cl	326.44	9.189	6.98	-2.209	-2.519	0.000295	0.00373	-2.42829	-3.53018	93.8589	20	-113.859	-2.54959	0	0.11	9.5	1.59	1.94
1271	PCB-107	070424-68-9	polyethylene	7.64868e+08	8.88359	1.31826e+06	6.12	0.93	8.85207	6.08848	7.11327e+08	1.22598e+06	8.57131	6.14831	20	293	(Choi, Cho, Luthy, 2013)	Water (Log)	cm^3/g	C1=CC(=C(C=C1C2=CC(=CC(=C2Cl)Cl)Cl)Cl)Cl	326.44	9.403	6.98	-2.423	-2.423	0.000295	0.00373	-2.42829	-3.53018	93.8589	20	-113.859	-2.76359	0	0.11	9.5	1.59	1.94
1067	PCB-118	031508-00-6	polyethylene	6.51736e+08	8.81407	2.63027e+06	6.42	0.93	8.78255	6.38848	6.06115e+08	2.44615e+06	8.51731	6.44831	20	293	(Choi, Cho, Luthy, 2013)	Water (Log)	cm^3/g	C1=CC(=C(C=C1C2=CC(=C(C=C2Cl)Cl)Cl)Cl)Cl	326.44	9.049	6.98	-2.069	-1.929	0.000295	0.0145	-1.83863	-3.53018	88.6724	20	-108.672	-2.39407	0	0.11	9.5	1.59	1.94
988	1-methylpyrene	002381-21-7	polyethylene	1.51672e+09	9.1809	257040	5.41	0.93	9.14939	5.37848	1.41055e+09	239047	8.86531	5.43831	20	293	(Choi, Cho, Luthy, 2013)	Water (Log)	cm^3/g	CC1=C2C=CC3=CC=CC4=C3C2=C(C=C1)C=C4	216.28	8.907	5.48	-3.427	-3.427	0.000234	0.00279	-2.5544	-3.63078	94.9681	20	-114.968	-3.7709	0	0.25	9.58	1.46	1.73
1207	PCB-82	052663-62-4	polyethylene	4.82599e+08	8.68359	831764	5.92	0.93	8.65207	5.88848	4.48817e+08	773540	8.37131	5.94831	20	293	(Choi, Cho, Luthy, 2013)	Water (Log)	cm^3/g	C1=CC(=C(C(=C1)Cl)Cl)C2=C(C(=C(C=C2)Cl)Cl)Cl	326.44	9.403	6.98	-2.423	-2.423	0.000295	0.00373	-2.42829	-3.53018	93.8589	20	-113.859	-2.76359	0	0.12	9.65	1.56	1.94
1077	PCB-105	032598-14-4	polyethylene	3.27832e+08	8.51565	2.75423e+06	6.44	0.93	8.48413	6.40848	3.04884e+08	2.56143e+06	8.21531	6.46831	20	293	(Choi, Cho, Luthy, 2013)	Water (Log)	cm^3/g	C1=CC(=C(C=C1C2=C(C(=C(C=C2)Cl)Cl)Cl)Cl)Cl	326.44	8.727	6.98	-1.747	-1.937	0.000295	0.0106	-1.97469	-3.53018	89.8692	20	-109.869	-2.07565	0	0.12	9.65	1.56	1.94
1096	PCB-155	033979-03-2	polyethylene	6.27641e+07	7.79771	3.63078e+06	6.56	0.93	7.76619	6.52848	5.83706e+07	3.37663e+06	7.50731	6.58831	20	293	(Choi, Cho, Luthy, 2013)	Water (Log)	cm^3/g	C1=C(C=C(C(=C1Cl)C2=C(C=C(C=C2Cl)Cl)Cl)Cl)Cl	360.88	8.539	7.62	-0.919	-0.989	7.74e-05	0.0253	-1.59688	-4.11126	86.546	20	-106.546	-1.23771	0	0.03	9.8	1.6	2.06
1260	PCB-147	068194-13-8	polyethylene	4.202e+09	9.62346	3.89045e+06	6.59	0.93	9.59194	6.55848	3.90786e+09	3.61812e+06	9.29931	6.61831	20	293	(Choi, Cho, Luthy, 2013)	Water (Log)	cm^3/g	C1=CC(=C(C=C1Cl)Cl)C2=C(C(=CC(=C2Cl)Cl)Cl)Cl	360.88	10.301	7.62	-2.681	-2.681	7.74e-05	0.00132	-2.87943	-4.11126	97.8271	20	-117.827	-3.03346	0	0	9.86	1.67	2.06
1209	PCB-151	052663-63-5	polyethylene	2.98958e+09	9.47561	3.31131e+06	6.52	0.93	9.44409	6.48848	2.78031e+09	3.07952e+06	9.16631	6.54831	20	293	(Choi, Cho, Luthy, 2013)	Water (Log)	cm^3/g	C1=CC(=C(C=C1Cl)C2=C(C(=CC(=C2Cl)Cl)Cl)Cl)Cl	360.88	10.238	7.62	-2.618	-2.618	7.74e-05	0.00484	-2.31515	-4.11126	92.8638	20	-112.864	-2.95561	0	0.03	9.87	1.71	2.06
1261	PCB-144	068194-14-9	polyethylene	3.12937e+09	9.49546	3.89045e+06	6.59	0.93	9.46394	6.55848	2.91031e+09	3.61812e+06	9.17131	6.61831	20	293	(Choi, Cho, Luthy, 2013)	Water (Log)	cm^3/g	C1=CC(=C(C=C1Cl)C2=C(C(=C(C=C2Cl)Cl)Cl)Cl)Cl	360.88	10.173	7.62	-2.553	-2.553	7.74e-05	0.00132	-2.87943	-4.11126	97.8271	20	-117.827	-2.90546	0	0.07	9.94	1.69	2.06
1169	PCB-136	038411-22-2	polyethylene	3.36091e+08	8.52646	1.69824e+06	6.23	0.93	8.49494	6.19848	3.12564e+08	1.57937e+06	8.20231	6.25831	20	293	(Choi, Cho, Luthy, 2013)	Water (Log)	cm^3/g	C1=CC(=C(C(=C1Cl)C2=C(C=CC(=C2Cl)Cl)Cl)Cl)Cl	360.88	9.564	7.62	-1.944	-2.444	7.74e-05	0.00132	-2.87943	-4.11126	97.8271	20	-117.827	-2.29646	0	0.04	9.95	1.68	2.06
1230	PCB-135	052744-13-5	polyethylene	9.38548e+08	8.97246	2.81838e+06	6.45	0.93	8.94094	6.41848	8.7285e+08	2.6211e+06	8.64831	6.47831	20	293	(Choi, Cho, Luthy, 2013)	Water (Log)	cm^3/g	C1=CC(=C(C(=C1Cl)C2=CC(=CC(=C2Cl)Cl)Cl)Cl)Cl	360.88	9.79	7.62	-2.17	-2.64	7.74e-05	0.00132	-2.87943	-4.11126	97.8271	20	-117.827	-2.52246	0	0.04	9.95	1.68	2.06
1160	PCB-149	038380-04-0	polyethylene	5.51652e+07	7.74166	3.23594e+06	6.51	0.93	7.71015	6.47848	5.13036e+07	3.00942e+06	7.44731	6.53831	20	293	(Choi, Cho, Luthy, 2013)	Water (Log)	cm^3/g	C1=CC(=C(C(=C1Cl)C2=CC(=C(C=C2Cl)Cl)Cl)Cl)Cl	360.88	8.529	7.62	-0.909	-1.249	7.74e-05	0.0179	-1.74715	-4.11126	87.8677	20	-107.868	-1.23166	0	0.04	9.95	1.68	2.06
1201	PCB-146	051908-16-8	polyethylene	4.50253e+09	9.65346	6.45654e+06	6.81	0.93	9.62194	6.77848	4.18735e+09	6.00458e+06	9.32931	6.83831	20	293	(Choi, Cho, Luthy, 2013)	Water (Log)	cm^3/g	C1=C(C=C(C(=C1Cl)Cl)C2=CC(=C(C=C2Cl)Cl)Cl)Cl	360.88	10.111	7.62	-2.491	-2.991	7.74e-05	0.00132	-2.87943	-4.11126	97.8271	20	-117.827	-2.84346	0	0.04	9.95	1.68	2.06
1108	PCB-153	035065-27-1	polyethylene	1.99523e+10	10.3	6.45654e+06	6.81	0.93	10.2685	6.77848	1.85556e+10	6.00458e+06	9.99531	6.83831	20	293	(Choi, Cho, Luthy, 2013)	Water (Log)	cm^3/g	C1=C(C(=CC(=C1Cl)Cl)Cl)C2=CC(=C(C=C2Cl)Cl)Cl	360.88	10.777	7.62	-3.157	-3.027	7.74e-05	0.00725	-2.13966	-4.11126	91.3202	20	-111.32	-3.48999	0	0.04	9.95	1.68	2.06
1227	PCB-141	052712-04-6	polyethylene	8.11814e+09	9.90946	9.12011e+06	6.96	0.93	9.87794	6.92848	7.54987e+09	8.4817e+06	9.58531	6.98831	20	293	(Choi, Cho, Luthy, 2013)	Water (Log)	cm^3/g	C1=CC(=C(C=C1Cl)C2=CC(=C(C(=C2Cl)Cl)Cl)Cl)Cl	360.88	10.217	7.62	-2.597	-3.027	7.74e-05	0.00132	-2.87943	-4.11126	97.8271	20	-117.827	-2.94946	0	0.04	9.95	1.68	2.06
1137	PCB-137	035694-06-5	polyethylene	5.07524e+09	9.70546	9.54993e+06	6.98	0.93	9.67394	6.94848	4.71997e+09	8.88143e+06	9.38131	7.00831	20	293	(Choi, Cho, Luthy, 2013)	Water (Log)	cm^3/g	C1=CC(=C(C=C1Cl)Cl)C2=CC(=C(C(=C2Cl)Cl)Cl)Cl	360.88	9.993	7.62	-2.373	-2.553	7.74e-05	0.00132	-2.87943	-4.11126	97.8271	20	-117.827	-2.72546	0	0	9.95	1.64	2.06
1225	PCB-134	052704-70-8	polyethylene	1.5996e+09	9.20401	3.38844e+06	6.53	0.93	9.1725	6.49848	1.48763e+09	3.15125e+06	8.88631	6.55831	20	293	(Choi, Cho, Luthy, 2013)	Water (Log)	cm^3/g	C1=CC(=C(C(=C1)Cl)Cl)C2=C(C(=CC(=C2Cl)Cl)Cl)Cl	360.88	9.948	7.62	-2.328	-2.698	7.74e-05	0.00232	-2.63451	-4.11126	95.6728	20	-115.673	-2.67401	0	0.03	10.07	1.68	2.06
1284	PCB-163	074472-44-9	polyethylene	5.94917e+09	9.77446	4.2658e+06	6.63	0.93	9.74294	6.59848	5.53273e+09	3.96719e+06	9.45031	6.65831	20	293	(Choi, Cho, Luthy, 2013)	Water (Log)	cm^3/g	C1=CC(=C(C=C1C2=C(C(=CC(=C2Cl)Cl)Cl)Cl)Cl)Cl	360.88	10.412	7.62	-2.792	-3.212	7.74e-05	0.00132	-2.87943	-4.11126	97.8271	20	-117.827	-3.14446	0	0.03	10.07	1.68	2.06
68	Benz[a]anthracene	000056-55-3	polyethylene	2.29175e+09	9.36017	269153	5.43	0.93	9.32865	5.39848	2.13133e+09	250313	9.00731	5.45831	20	293	(Choi, Cho, Luthy, 2013)	Water (Log)	cm^3/g	C1=CC=C2C(=C1)C=CC3=CC4=CC=CC=C4C=C32	228.3	9.069	5.52	-3.549	-3.309	3.62e-05	0.000107	-3.97062	-4.44129	107.425	20	-127.425	-3.93017	0	0.29	10.08	1.66	1.82
788	Chrysene	000218-01-9	polyethylene	7.01475e+09	9.84601	323594	5.51	0.93	9.81449	5.47848	6.52371e+09	300942	9.49831	5.53831	20	293	(Choi, Cho, Luthy, 2013)	Water (Log)	cm^3/g	C1=CC=C2C(=C1)C=CC3=C2C=CC4=CC=CC=C43	228.3	9.48	5.52	-3.96	-3.67	2.08e-07	0.000168	-3.77469	-6.68194	105.702	20	-125.702	-4.33601	0	0.29	10.08	1.66	1.82
1161	PCB-132	038380-05-1	polyethylene	6.56835e+08	8.81746	1.99526e+06	6.3	0.93	8.78594	6.26848	6.10857e+08	1.85559e+06	8.49331	6.32831	20	293	(Choi, Cho, Luthy, 2013)	Water (Log)	cm^3/g	C1=CC(=C(C(=C1C2=C(C=CC(=C2Cl)Cl)Cl)Cl)Cl)Cl	360.88	9.785	7.62	-2.165	-2.745	7.74e-05	0.00132	-2.87943	-4.11126	97.8271	20	-117.827	-2.51746	0	0.05	10.1	1.65	2.06
1112	PCB-138	035065-28-2	polyethylene	7.54788e+09	9.87782	4.57088e+06	6.66	0.93	9.84631	6.62848	7.01953e+09	4.25092e+06	9.57431	6.68831	20	293	(Choi, Cho, Luthy, 2013)	Water (Log)	cm^3/g	C1=CC(=C(C(=C1C2=CC(=C(C=C2Cl)Cl)Cl)Cl)Cl)Cl	360.88	10.506	7.62	-2.886	-3.066	7.74e-05	0.00803	-2.09528	-4.11126	90.9299	20	-110.93	-3.21782	0	0.05	10.1	1.65	2.06
1211	PCB-130	052663-66-8	polyethylene	8.36482e+09	9.92246	9.54993e+06	6.98	0.93	9.89094	6.94848	7.77928e+09	8.88143e+06	9.59831	7.00831	20	293	(Choi, Cho, Luthy, 2013)	Water (Log)	cm^3/g	C1=CC(=C(C(=C1C2=CC(=CC(=C2Cl)Cl)Cl)Cl)Cl)Cl	360.88	10.21	7.62	-2.59	-2.82	7.74e-05	0.00132	-2.87943	-4.11126	97.8271	20	-117.827	-2.94246	0	0.05	10.1	1.65	2.06
1253	PCB-131	061798-70-7	polyethylene	9.53798e+08	8.97946	1.58489e+06	6.2	0.93	8.94794	6.16848	8.87032e+08	1.47395e+06	8.65531	6.22831	20	293	(Choi, Cho, Luthy, 2013)	Water (Log)	cm^3/g	C1=CC(=C(C(=C1)Cl)Cl)C2=C(C(=C(C=C2Cl)Cl)Cl)Cl	360.88	10.047	7.62	-2.427	-2.797	7.74e-05	0.00132	-2.87943	-4.11126	97.8271	20	-117.827	-2.77946	0	0.08	10.15	1.66	2.06
1283	PCB-158	074472-42-7	polyethylene	3.76233e+09	9.57546	4.67735e+06	6.67	0.93	9.54394	6.63848	3.49896e+09	4.34994e+06	9.25131	6.69831	20	293	(Choi, Cho, Luthy, 2013)	Water (Log)	cm^3/g	C1=CC(=C(C=C1C2=C(C(=C(C=C2Cl)Cl)Cl)Cl)Cl)Cl	360.88	10.173	7.62	-2.553	-2.553	0.000207	0.00132	-2.87943	-3.68403	97.8271	20	-117.827	-2.90546	0	0.08	10.15	1.66	2.06
1168	PCB-156	038380-08-4	polyethylene	1.18753e+09	9.07465	3.31131e+06	6.52	0.93	9.04313	6.48848	1.1044e+09	3.07952e+06	8.76131	6.54831	20	293	(Choi, Cho, Luthy, 2013)	Water (Log)	cm^3/g	C1=CC(=C(C=C1C2=CC(=C(C(=C2Cl)Cl)Cl)Cl)Cl)Cl	360.88	9.833	7.62	-2.213	-2.233	7.74e-05	0.0034	-2.46852	-4.11126	94.2128	20	-114.213	-2.55465	0	0.04	10.16	1.65	2.06
1164	PCB-128	038380-07-3	polyethylene	6.62732e+09	9.82134	3.31131e+06	6.52	0.93	9.78982	6.48848	6.1634e+09	3.07952e+06	9.51331	6.54831	20	293	(Choi, Cho, Luthy, 2013)	Water (Log)	cm^3/g	C1=CC(=C(C(=C1C2=C(C(=C(C=C2)Cl)Cl)Cl)Cl)Cl)Cl	360.88	10.585	7.62	-2.965	-3.275	7.74e-05	0.00541	-2.2668	-4.11126	92.4385	20	-112.439	-3.30134	0	0.05	10.25	1.62	2.06
1263	PCB-157	069782-90-7	polyethylene	2.26703e+10	10.3555	2.95121e+07	7.47	0.93	10.3239	7.43848	2.10833e+10	2.74462e+07	10.0313	7.49831	20	293	(Choi, Cho, Luthy, 2013)	Water (Log)	cm^3/g	C1=CC(=C(C(=C1C2=CC(=C(C(=C2)Cl)Cl)Cl)Cl)Cl)Cl	360.88	10.153	7.62	-2.533	-2.553	7.74e-05	0.00132	-2.87943	-4.11126	97.8271	20	-117.827	-2.88546	0	0.05	10.25	1.62	2.06
1229	PCB-185	052712-05-7	polyethylene	1.5434e+10	10.1885	9.54993e+06	6.98	0.93	10.157	6.94848	1.43536e+10	8.88143e+06	9.85231	7.00831	20	293	(Choi, Cho, Luthy, 2013)	Water (Log)	cm^3/g	C1=CC(=C(C=C1Cl)C2=C(C(=C(C(=C2Cl)Cl)Cl)Cl)Cl)Cl	395.33	11.114	8.27	-2.844	-3.184	1.74e-05	0.000461	-3.3363	-4.75945	101.846	20	-121.846	-3.20848	0	0	10.51	1.79	2.18
1285	PCB-192	074472-51-8	polyethylene	1.40436e+10	10.1475	1.25893e+07	7.1	0.93	10.116	7.06848	1.30605e+10	1.1708e+07	9.81131	7.12831	20	293	(Choi, Cho, Luthy, 2013)	Water (Log)	cm^3/g	C1=C(C=C(C=C1Cl)Cl)C2=C(C(=C(C(=C2Cl)Cl)Cl)Cl)Cl	395.33	10.953	8.27	-2.683	-2.683	1.74e-05	0.000461	-3.3363	-4.75945	101.846	20	-121.846	-3.04748	0	0	10.51	1.74	2.18
1212	PCB-178	052663-67-9	polyethylene	2.40701e+10	10.3815	9.77237e+06	6.99	0.93	10.35	6.95848	2.23852e+10	9.08831e+06	10.0453	7.01831	20	293	(Choi, Cho, Luthy, 2013)	Water (Log)	cm^3/g	C1=C(C=C(C(=C1Cl)Cl)C2=C(C(=CC(=C2Cl)Cl)Cl)Cl)Cl	395.33	11.297	8.27	-3.027	-3.027	1.74e-05	0.000461	-3.3363	-4.75945	101.846	20	-121.846	-3.39148	0	0	10.52	1.78	2.18
1214	PCB-187	052663-68-0	polyethylene	1.47054e+10	10.1675	1.31826e+07	7.12	0.93	10.136	7.08848	1.3676e+10	1.22598e+07	9.83131	7.14831	20	293	(Choi, Cho, Luthy, 2013)	Water (Log)	cm^3/g	C1=C(C(=CC(=C1Cl)Cl)Cl)C2=C(C(=CC(=C2Cl)Cl)Cl)Cl	395.33	10.953	8.27	-2.683	-2.683	1.74e-05	0.000461	-3.3363	-4.75945	101.846	20	-121.846	-3.04748	0	0	10.52	1.78	2.18
1250	PCB-182	060145-23-5	polyethylene	1.47054e+10	10.1675	1.31826e+07	7.12	0.93	10.136	7.08848	1.3676e+10	1.22598e+07	9.83131	7.14831	20	293	(Choi, Cho, Luthy, 2013)	Water (Log)	cm^3/g	C1=C(C=C(C(=C1Cl)C2=CC(=C(C(=C2Cl)Cl)Cl)Cl)Cl)Cl	395.33	10.953	8.27	-2.683	-2.683	1.74e-05	0.000461	-3.3363	-4.75945	101.846	20	-121.846	-3.04748	0	0	10.53	1.71	2.18
972	6-methylchrysene	001705-85-7	polyethylene	8.85872e+09	9.94737	870964	5.94	0.93	9.91585	5.90848	8.23861e+09	809996	9.61431	5.96831	20	293	(Choi, Cho, Luthy, 2013)	Water (Log)	cm^3/g	CC1=CC2=C(C=CC3=CC=CC=C32)C4=CC=CC=C14	242.32	9.716	6.07	-3.646	-3.646	7.26e-05	0.000605	-3.21824	-4.13906	100.807	20	-120.807	-4.00737	0	0.29	10.55	1.61	1.96
993	7-methylbenz[a]anthracene	002541-69-7	polyethylene	1.04081e+10	10.0174	1.02329e+06	6.01	0.93	9.98585	5.97848	9.67953e+09	951662	9.68431	6.03831	20	293	(Choi, Cho, Luthy, 2013)	Water (Log)	cm^3/g	CC1=C2C=CC3=CC=CC=C3C2=CC4=CC=CC=C14	242.32	9.716	6.07	-3.646	-3.646	4.07e-05	0.000605	-3.21824	-4.39041	100.807	20	-120.807	-4.00737	0	0.29	10.55	1.61	1.96
1210	PCB-176	052663-65-7	polyethylene	1.06531e+10	10.0275	9.54993e+06	6.98	0.93	9.99596	6.94848	9.90741e+09	8.88143e+06	9.69131	7.00831	20	293	(Choi, Cho, Luthy, 2013)	Water (Log)	cm^3/g	C1=CC(=C(C(=C1Cl)C2=C(C(=C(C=C2Cl)Cl)Cl)Cl)Cl)Cl	395.33	10.953	8.27	-2.683	-2.683	1.74e-05	0.000461	-3.3363	-4.75945	101.846	20	-121.846	-3.04748	0	0.01	10.6	1.76	2.18
1215	PCB-183	052663-69-1	polyethylene	1.53985e+10	10.1875	1.38038e+07	7.14	0.93	10.156	7.10848	1.43206e+10	1.28376e+07	9.85131	7.16831	20	293	(Choi, Cho, Luthy, 2013)	Water (Log)	cm^3/g	C1=C(C(=CC(=C1Cl)Cl)Cl)C2=C(C(=C(C=C2Cl)Cl)Cl)Cl	395.33	10.953	8.27	-2.683	-2.683	0.000129	0.000461	-3.3363	-3.88941	101.846	20	-121.846	-3.04748	0	0.01	10.6	1.76	2.18
1219	PCB-172	052663-74-8	polyethylene	1.41084e+11	11.1495	3.23594e+06	6.51	0.93	11.118	6.47848	1.31208e+11	3.00942e+06	10.8133	6.53831	20	293	(Choi, Cho, Luthy, 2013)	Water (Log)	cm^3/g	C1=C(C=C(C(=C1Cl)Cl)C2=CC(=C(C(=C2Cl)Cl)Cl)Cl)Cl	395.33	12.545	8.27	-4.275	-4.275	1.74e-05	0.000461	-3.3363	-4.75945	101.846	20	-121.846	-4.63948	0	0	10.61	1.75	2.18
1170	PCB-174	038411-25-5	polyethylene	4.43075e+10	10.6465	1.09648e+07	7.04	0.93	10.615	7.00848	4.1206e+10	1.01972e+07	10.3103	7.06831	20	293	(Choi, Cho, Luthy, 2013)	Water (Log)	cm^3/g	C1=CC(=C(C(=C1Cl)C2=CC(=C(C(=C2Cl)Cl)Cl)Cl)Cl)Cl	395.33	11.512	8.27	-3.242	-3.242	1.74e-05	0.000461	-3.3363	-4.75945	101.846	20	-121.846	-3.60648	0	0	10.61	1.75	2.18
1120	PCB-180	035065-29-3	polyethylene	8.52877e+10	10.9309	1.58489e+07	7.2	0.93	10.8994	7.16848	7.93176e+10	1.47395e+07	10.6163	7.22831	20	293	(Choi, Cho, Luthy, 2013)	Water (Log)	cm^3/g	C1=C(C(=CC(=C1Cl)Cl)Cl)C2=CC(=C(C(=C2Cl)Cl)Cl)Cl	395.33	11.658	8.27	-3.388	-3.388	1.74e-05	0.00305	-2.5157	-4.75945	94.6278	20	-114.628	-3.73089	0	0	10.61	1.75	2.18
1216	PCB-177	052663-70-4	polyethylene	1.31062e+10	10.1175	1.1749e+07	7.07	0.93	10.086	7.03848	1.21888e+10	1.09265e+07	9.78131	7.09831	20	293	(Choi, Cho, Luthy, 2013)	Water (Log)	cm^3/g	C1=CC(=C(C(=C1C2=C(C(=CC(=C2Cl)Cl)Cl)Cl)Cl)Cl)Cl	395.33	10.953	8.27	-2.683	-2.683	1.74e-05	0.000461	-3.3363	-4.75945	101.846	20	-121.846	-3.04748	0	0	10.67	1.75	2.18
1185	PCB-190	041411-64-7	polyethylene	1.25163e+10	10.0975	1.12202e+07	7.05	0.93	10.066	7.01848	1.16402e+10	1.04348e+07	9.76131	7.07831	20	293	(Choi, Cho, Luthy, 2013)	Water (Log)	cm^3/g	C1=CC(=C(C=C1C2=C(C(=C(C(=C2Cl)Cl)Cl)Cl)Cl)Cl)Cl	395.33	10.953	8.27	-2.683	-2.683	1.74e-05	0.000461	-3.3363	-4.75945	101.846	20	-121.846	-3.04748	0	0	10.72	1.76	2.18
1217	PCB-171	052663-71-5	polyethylene	9.13644e+08	8.96078	5.7544e+06	6.76	0.93	8.92926	6.72848	8.49689e+08	5.35159e+06	8.65031	6.78831	20	293	(Choi, Cho, Luthy, 2013)	Water (Log)	cm^3/g	C1=CC(=C(C(=C1C2=C(C(=C(C=C2Cl)Cl)Cl)Cl)Cl)Cl)Cl	395.33	10.132	8.27	-1.862	-1.862	1.74e-05	0.00437	-2.35952	-4.75945	93.254	20	-113.254	-2.20078	0	0.01	10.74	1.73	2.18
1123	PCB-170	035065-30-6	polyethylene	6.79109e+10	10.8319	1.12202e+07	7.05	0.93	10.8004	7.01848	6.31571e+10	1.04348e+07	10.5123	7.07831	20	293	(Choi, Cho, Luthy, 2013)	Water (Log)	cm^3/g	C1=CC(=C(C(=C1C2=CC(=C(C(=C2Cl)Cl)Cl)Cl)Cl)Cl)Cl	395.33	11.704	8.27	-3.434	-3.434	1.74e-05	0.00196	-2.70774	-4.75945	96.317	20	-116.317	-3.78194	0	0	10.76	1.72	2.18
87	7,12-dimethylbenz[a]anthracene	000057-97-6	polyethylene	3.90687e+09	9.59183	1.69824e+06	6.23	0.93	9.56031	6.19848	3.63339e+09	1.57937e+06	9.25131	6.25831	20	293	(Choi, Cho, Luthy, 2013)	Water (Log)	cm^3/g	CC1=C2C=CC3=CC=CC=C3C2=C(C4=CC=CC=C14)C	256.35	9.613	6.62	-2.993	-3.813	3.38e-05	0.000315	-3.50169	-4.47108	103.3	20	-123.3	-3.36183	0	0.29	11.02	1.55	2.11
986	PCB-202	002136-99-4	polyethylene	2.48621e+09	9.39554	1.31826e+07	7.12	0.93	9.36402	7.08848	2.31218e+09	1.22598e+07	9.10131	7.14831	20	293	(Choi, Cho, Luthy, 2013)	Water (Log)	cm^3/g	C1=C(C(=C(C(=C1Cl)Cl)C2=C(C(=CC(=C2Cl)Cl)Cl)Cl)Cl)Cl	429.77	10.863	8.91	-1.953	-3.133	3.83e-06	0.0181	-1.74232	-5.4168	87.8252	20	-107.825	-2.27554	0	0	11.09	1.88	2.3
1221	PCB-203	052663-76-0	polyethylene	3.79813e+10	10.5796	2.45471e+07	7.39	0.93	10.5481	7.35848	3.53226e+10	2.28288e+07	10.2313	7.41831	20	293	(Choi, Cho, Luthy, 2013)	Water (Log)	cm^3/g	C1=C(C(=CC(=C1Cl)Cl)Cl)C2=C(C(=C(C(=C2Cl)Cl)Cl)Cl)Cl	429.77	11.723	8.91	-2.813	-2.813	3.83e-06	0.00016	-3.79588	-5.4168	105.888	20	-125.888	-3.18957	0	0	11.17	1.86	2.3
1183	PCB-201	040186-71-8	polyethylene	9.65094e+10	10.9846	2.81838e+07	7.45	0.93	10.9531	7.41848	8.97537e+10	2.6211e+07	10.6363	7.47831	20	293	(Choi, Cho, Luthy, 2013)	Water (Log)	cm^3/g	C1=C(C(=C(C(=C1Cl)Cl)Cl)C2=C(C(=CC(=C2Cl)Cl)Cl)Cl)Cl	429.77	12.068	8.91	-3.158	-3.158	3.83e-06	0.00016	-3.79588	-5.4168	105.888	20	-125.888	-3.53457	0	0	11.17	1.86	2.3
1218	PCB-200	052663-73-7	polyethylene	4.56635e+10	10.6596	2.95121e+07	7.47	0.93	10.6281	7.43848	4.24671e+10	2.74462e+07	10.3113	7.49831	20	293	(Choi, Cho, Luthy, 2013)	Water (Log)	cm^3/g	C1=CC(=C(C(=C1Cl)C2=C(C(=C(C(=C2Cl)Cl)Cl)Cl)Cl)Cl)Cl	429.77	11.723	8.91	-2.813	-2.813	3.83e-06	0.00016	-3.79588	-5.4168	105.888	20	-125.888	-3.18957	0	0	11.17	1.86	2.3
1220	PCB-199	052663-75-9	polyethylene	3.9316e+10	10.5946	6.76083e+06	6.83	0.93	10.5631	6.79848	3.65639e+10	6.28757e+06	10.2463	6.85831	20	293	(Choi, Cho, Luthy, 2013)	Water (Log)	cm^3/g	C1=C(C(=C(C(=C1Cl)Cl)Cl)Cl)C2=C(C(=CC(=C2Cl)Cl)Cl)Cl	429.77	12.298	8.91	-3.388	-3.388	3.83e-06	0.00016	-3.79588	-5.4168	105.888	20	-125.888	-3.76457	0	0	11.18	1.85	2.3
1081	PCB-197	033091-17-7	polyethylene	9.76269e+09	9.98957	6.30957e+06	6.8	0.93	9.95805	6.76848	9.0793e+09	5.8679e+06	9.64131	6.82831	20	293	(Choi, Cho, Luthy, 2013)	Water (Log)	cm^3/g	C1=C(C(=C(C(=C1Cl)Cl)Cl)C2=C(C(=C(C=C2Cl)Cl)Cl)Cl)Cl	429.77	11.723	8.91	-2.813	-2.813	3.83e-06	0.00016	-3.79588	-5.4168	105.888	20	-125.888	-3.18957	0	0	11.24	1.83	2.3
1138	PCB-194	035694-08-7	polyethylene	8.80176e+10	10.9446	2.5704e+07	7.41	0.93	10.9131	7.37848	8.18563e+10	2.39047e+07	10.5963	7.43831	20	293	(Choi, Cho, Luthy, 2013)	Water (Log)	cm^3/g	C1=C(C(=C(C(=C1Cl)Cl)Cl)Cl)C2=CC(=C(C(=C2Cl)Cl)Cl)Cl	429.77	12.068	8.91	-3.158	-3.388	3.83e-06	0.00016	-3.79588	-5.4168	105.888	20	-125.888	-3.53457	0	0	11.27	1.82	2.3
1287	PCB-205	074472-53-0	polyethylene	2.18559e+10	10.3396	1.41254e+07	7.15	0.93	10.3081	7.11848	2.0326e+10	1.31366e+07	9.99131	7.17831	20	293	(Choi, Cho, Luthy, 2013)	Water (Log)	cm^3/g	C1=C(C=C(C(=C1Cl)Cl)Cl)C2=C(C(=C(C(=C2Cl)Cl)Cl)Cl)Cl	429.77	11.723	8.91	-2.813	-2.813	3.83e-06	0.00016	-3.79588	-5.4168	105.888	20	-125.888	-3.18957	0	0	11.31	1.83	2.3
1223	PCB-195	052663-78-2	polyethylene	1.26932e+11	11.1036	2.39883e+07	7.38	0.93	11.0721	7.34848	1.18046e+11	2.23091e+07	10.7553	7.40831	20	293	(Choi, Cho, Luthy, 2013)	Water (Log)	cm^3/g	C1=CC(=C(C(=C1C2=C(C(=C(C(=C2Cl)Cl)Cl)Cl)Cl)Cl)Cl)Cl	429.77	12.257	8.91	-3.347	-3.347	3.83e-06	0.00016	-3.79588	-5.4168	105.888	20	-125.888	-3.72357	0	0	11.31	1.83	2.3
967	d12-perylene	001520-96-3	polyethylene	1.7372e+10	10.2398	794328	5.9	0.93	10.2083	5.86848	1.61559e+10	738725	9.89431	5.92831	20	293	(Choi, Cho, Luthy, 2013)	Water (Log)	cm^3/g	C1=CC2=C3C(=C1)C4=CC=CC5=C4C(=CC=C5)C3=CC=C2	252.32	10.076	6.11	-3.966	-3.826	1.79e-07	0.000203	-3.6925	-6.74715	104.979	20	-124.979	-4.33985	0	0.31	11.48	1.84	1.95
739	perylene	000198-55-0	polyethylene	1.81907e+10	10.2598	831764	5.92	0.93	10.2283	5.88848	1.69174e+10	773540	9.91431	5.94831	20	293	(Choi, Cho, Luthy, 2013)	Water (Log)	cm^3/g	C1=CC2=C3C(=C1)C4=CC=CC5=C4C(=CC=C5)C3=CC=C2	252.32	10.076	6.11	-3.966	-3.826	1.79e-07	0.000203	-3.6925	-6.74715	104.979	20	-124.979	-4.33985	0	0.31	11.48	1.84	1.95
731	Benzo[e]pyrene	000192-97-2	polyethylene	4.77542e+11	11.679	1.09648e+06	6.04	0.93	11.6475	6.00848	4.44114e+11	1.01972e+06	11.3093	6.06831	20	293	(Choi, Cho, Luthy, 2013)	Water (Log)	cm^3/g	C1=CC=C2C(=C1)C3=CC=CC4=C3C5=C(C=CC=C25)C=C4	252.32	11.351	6.11	-5.241	-4.911	2.58e-06	2.45e-05	-4.61083	-5.58838	113.056	20	-133.056	-5.63901	0	0.31	11.48	1.84	1.95
747	Benzo[b]fluoranthene	000205-99-2	polyethylene	4.4706e+10	10.6504	1.14815e+06	6.06	0.93	10.6188	6.02848	4.15766e+10	1.06778e+06	10.3293	6.08831	20	293	(Choi, Cho, Luthy, 2013)	Water (Log)	cm^3/g	C1=CC=C2C3=C4C(=CC=C3)C5=CC=CC=C5C4=CC2=C1	252.32	10.351	6.11	-4.241	-4.571	3.32e-06	0.00173	-2.76195	-5.47886	96.7938	20	-116.794	-4.59037	0	0.31	11.48	1.84	1.95
34	Benzo[a]pyrene	000050-32-8	polyethylene	1.93947e+11	11.2877	1.38038e+06	6.14	0.93	11.2562	6.10848	1.80371e+11	1.28376e+06	10.9173	6.16831	20	293	(Choi, Cho, Luthy, 2013)	Water (Log)	cm^3/g	C1=CC=C2C3=C4C(=CC2=C1)C=CC5=C4C(=CC=C5)C=C3	252.32	10.859	6.11	-4.749	-4.729	1.31e-07	2.31e-05	-4.63639	-6.88273	113.281	20	-133.281	-5.14768	0	0.31	11.48	1.84	1.95
775	Benzo[k]fluoranthene	000207-08-9	polyethylene	1.54891e+11	11.19	1.44544e+06	6.16	0.93	11.1585	6.12848	1.44048e+11	1.34426e+06	10.8103	6.18831	20	293	(Choi, Cho, Luthy, 2013)	Water (Log)	cm^3/g	C1=CC=C2C=C3C4=CC=CC5=C4C(=CC=C5)C3=CC2=C1	252.32	10.732	6.11	-4.622	-4.622	1.05e-07	1.02e-05	-4.9914	-6.97881	116.404	20	-136.404	-5.03002	0	0.31	11.48	1.84	1.95
1222	PCB-208	052663-77-1	polyethylene	9.58804e+08	8.98173	1.12202e+07	7.05	0.93	8.95021	7.01848	8.91688e+08	1.04348e+07	8.62131	7.07831	20	293	(Choi, Cho, Luthy, 2013)	Water (Log)	cm^3/g	C1=C(C(=C(C(=C1Cl)Cl)C2=C(C(=C(C(=C2Cl)Cl)Cl)Cl)Cl)Cl)Cl	464.22	11.103	9.56	-1.543	-2.943	1.01e-06	5.52e-05	-4.25806	-5.99568	109.953	20	-129.953	-1.93173	0	0	11.74	1.96	2.43
1224	PCB-207	052663-79-3	polyethylene	1.59122e+10	10.2017	7.4131e+06	6.87	0.93	10.1702	6.83848	1.47983e+10	6.89419e+06	9.84131	6.89831	20	293	(Choi, Cho, Luthy, 2013)	Water (Log)	cm^3/g	C1=C(C(=C(C(=C1Cl)Cl)Cl)C2=C(C(=C(C(=C2Cl)Cl)Cl)Cl)Cl)Cl	464.22	12.503	9.56	-2.943	-2.943	1.01e-06	5.52e-05	-4.25806	-5.99568	109.953	20	-129.953	-3.33173	0	0	11.81	1.93	2.43
1184	PCB-206	040186-72-9	polyethylene	2.96299e+10	10.4717	3.63078e+07	7.56	0.93	10.4402	7.52848	2.75558e+10	3.37663e+07	10.1113	7.58831	20	293	(Choi, Cho, Luthy, 2013)	Water (Log)	cm^3/g	C1=C(C(=C(C(=C1Cl)Cl)Cl)Cl)C2=C(C(=C(C(=C2Cl)Cl)Cl)Cl)Cl	464.22	12.083	9.56	-2.523	-2.943	1.01e-06	5.52e-05	-4.25806	-5.99568	109.953	20	-129.953	-2.91173	0	0	11.82	1.93	2.43
46	Dibenz[ah]anthracene	000053-70-3	polyethylene	5.93615e+11	11.7735	1.99526e+06	6.3	0.93	11.742	6.26848	5.52062e+11	1.85559e+06	11.4073	6.32831	20	293	(Choi, Cho, Luthy, 2013)	Water (Log)	cm^3/g	C1=CC=C2C(=C1)C=CC3=CC4=C(C=CC5=CC=CC=C54)C=C32	278.36	11.779	6.7	-5.079	-5.239	1.85e-09	3.33e-05	-4.47756	-8.73283	111.884	20	-131.884	-5.47351	0	0.35	12.45	1.99	2.19
727	Benzo[ghi]perylene	000191-24-2	polyethylene	8.15915e+11	11.9116	1.69824e+06	6.23	0.93	11.8801	6.19848	7.58801e+11	1.57937e+06	11.5293	6.25831	20	293	(Choi, Cho, Luthy, 2013)	Water (Log)	cm^3/g	c1cc2ccc3ccc4ccc5cccc6c5c4c3c2c6c1	276.34	11.971	6.7	-5.271	-5.271	1.17e-07	8.11e-06	-5.09098	-6.93181	117.28	20	-137.28	-5.68164	0	0.33	12.89	2.02	2.08
736	Indeno[123,cd]pyrene	000193-39-5	polyethylene	6.17789e+11	11.7908	3.16228e+06	6.5	0.93	11.7593	6.46848	5.74544e+11	2.94092e+06	11.3753	6.52831	20	293	(Choi, Cho, Luthy, 2013)	Water (Log)	cm^3/g	c1ccc-2c(c1)-c3ccc4ccc5cccc6c5c4c3c2c6	276.34	11.547	6.7	-4.847	-4.847	1.67e-08	4.44e-07	-6.35262	-7.77728	128.377	20	-148.377	-5.29084	0	0.33	12.89	2.02	2.08
422	styrene	000100-42-5	imitation parchment paper	339	2.5302	33.2047	1.5212	xxxxxxxxx	xxxxxxxxx	xxxxxxxxx	xxxxxxxxx	xxxxxxxxx	2.5302	1.5212	25	298	(Chong-Xing Huang, Dan-Dan Duan, Meng-Meng Yan, Suang-Fei Wang, 2012)	Air	dimensionless	C=CC1=CC=CC=C1	104.15	3.899	2.89	-1.009	-0.949	674	853	2.93095	2.82866	46.7197	20	-66.7197	-1.009	0	0.17	3.86	0.7	0.96
715	4-Deoxypyridoxine	000148-51-6	imitation parchment paper	1153	3.06183	1.70149e-09	-8.76917	xxxxxxxxx	xxxxxxxxx	xxxxxxxxx	xxxxxxxxx	xxxxxxxxx	3.06183	-8.76917	25	298	(Chong-Xing Huang, Dan-Dan Duan, Meng-Meng Yan, Suang-Fei Wang, 2012)	Air	dimensionless	CC1=C(C(=NC=C1CO)C)O	153.18	12.331	0.5	-11.831	-11.831	0.00373	0.0184	-1.73518	-2.42829	87.7624	20	-107.762	-11.831	0.62	1.09	6.16	1.06	1.22
274	Diethyl phthalate	000084-66-2	imitation parchment paper	639	2.8055	0.0270708	-1.5675	xxxxxxxxx	xxxxxxxxx	xxxxxxxxx	xxxxxxxxx	xxxxxxxxx	2.8055	-1.5675	25	298	(Chong-Xing Huang, Dan-Dan Duan, Meng-Meng Yan, Suang-Fei Wang, 2012)	Air	dimensionless	CCOC(=O)C1=CC=CC=C1C(=O)OCC	222.24	7.023	2.65	-4.373	-4.603	0.339	0.28	-0.552842	-0.4698	77.3627	20	-97.3627	-4.373	0	0.78	7.11	1.39	1.71
277	Diisobutyl phthalate	000084-69-5	imitation parchment paper	693	2.84073	0.0773986	-1.11127	xxxxxxxxx	xxxxxxxxx	xxxxxxxxx	xxxxxxxxx	xxxxxxxxx	2.84073	-1.11127	25	298	(Chong-Xing Huang, Dan-Dan Duan, Meng-Meng Yan, Suang-Fei Wang, 2012)	Air	dimensionless	CC(C)COC(=O)C1=CC=CC=C1C(=O)OCC(C)C	278.35	8.412	4.46	-3.952	-4.302	0.322	0.321	-0.493495	-0.492144	76.8407	20	-96.8407	-3.952	0	0.85	8.86	1.37	2.27
259	bisphenol A	000080-05-7	imitation parchment paper	1233	3.09096	9.63747e-07	-6.01604	xxxxxxxxx	xxxxxxxxx	xxxxxxxxx	xxxxxxxxx	xxxxxxxxx	3.09096	-6.01604	25	298	(Chong-Xing Huang, Dan-Dan Duan, Meng-Meng Yan, Suang-Fei Wang, 2012)	Air	dimensionless	CC(C)(C1=CC=C(C=C1)O)C2=CC=C(C=C2)O	228.29	12.747	3.64	-9.107	-9.427	3.03e-05	0.000613	-3.21254	-4.51856	100.757	20	-120.757	-9.107	1	0.79	8.89	1.46	1.86
284	Dibutyl phthalate	000084-74-2	imitation parchment paper	923	2.9652	0.0879431	-1.0558	xxxxxxxxx	xxxxxxxxx	xxxxxxxxx	xxxxxxxxx	xxxxxxxxx	2.9652	-1.0558	25	298	(Chong-Xing Huang, Dan-Dan Duan, Meng-Meng Yan, Suang-Fei Wang, 2012)	Air	dimensionless	CCCCOC(=O)C1=CC=CC=C1C(=O)OCCCC	278.35	8.631	4.61	-4.021	-4.131	0.0303	0.00268	-2.57187	-1.51856	95.1218	20	-115.122	-4.021	0	0.8	9.09	1.4	2.27
423	styrene	000100-42-5	Kraft paper	356	2.55145	34.8698	1.54245	xxxxxxxxx	xxxxxxxxx	xxxxxxxxx	xxxxxxxxx	xxxxxxxxx	2.55145	1.54245	25	298	(Chong-Xing Huang, Dan-Dan Duan, Meng-Meng Yan, Suang-Fei Wang, 2012)	Air	dimensionless	C=CC1=CC=CC=C1	104.15	3.899	2.89	-1.009	-0.949	674	853	2.93095	2.82866	46.7197	20	-66.7197	-1.009	0	0.17	3.86	0.7	0.96
716	4-Deoxypyridoxine	000148-51-6	Kraft paper	852	2.93044	1.2573e-09	-8.90056	xxxxxxxxx	xxxxxxxxx	xxxxxxxxx	xxxxxxxxx	xxxxxxxxx	2.93044	-8.90056	25	298	(Chong-Xing Huang, Dan-Dan Duan, Meng-Meng Yan, Suang-Fei Wang, 2012)	Air	dimensionless	CC1=C(C(=NC=C1CO)C)O	153.18	12.331	0.5	-11.831	-11.831	0.00373	0.0184	-1.73518	-2.42829	87.7624	20	-107.762	-11.831	0.62	1.09	6.16	1.06	1.22
275	Diethyl phthalate	000084-66-2	Kraft paper	573	2.75815	0.0242747	-1.61485	xxxxxxxxx	xxxxxxxxx	xxxxxxxxx	xxxxxxxxx	xxxxxxxxx	2.75815	-1.61485	25	298	(Chong-Xing Huang, Dan-Dan Duan, Meng-Meng Yan, Suang-Fei Wang, 2012)	Air	dimensionless	CCOC(=O)C1=CC=CC=C1C(=O)OCC	222.24	7.023	2.65	-4.373	-4.603	0.339	0.28	-0.552842	-0.4698	77.3627	20	-97.3627	-4.373	0	0.78	7.11	1.39	1.71
278	Diisobutyl phthalate	000084-69-5	Kraft paper	552	2.74194	0.0616509	-1.21006	xxxxxxxxx	xxxxxxxxx	xxxxxxxxx	xxxxxxxxx	xxxxxxxxx	2.74194	-1.21006	25	298	(Chong-Xing Huang, Dan-Dan Duan, Meng-Meng Yan, Suang-Fei Wang, 2012)	Air	dimensionless	CC(C)COC(=O)C1=CC=CC=C1C(=O)OCC(C)C	278.35	8.412	4.46	-3.952	-4.302	0.322	0.321	-0.493495	-0.492144	76.8407	20	-96.8407	-3.952	0	0.85	8.86	1.37	2.27
260	bisphenol A	000080-05-7	Kraft paper	1112	3.0461	8.6917e-07	-6.0609	xxxxxxxxx	xxxxxxxxx	xxxxxxxxx	xxxxxxxxx	xxxxxxxxx	3.0461	-6.0609	25	298	(Chong-Xing Huang, Dan-Dan Duan, Meng-Meng Yan, Suang-Fei Wang, 2012)	Air	dimensionless	CC(C)(C1=CC=C(C=C1)O)C2=CC=C(C=C2)O	228.29	12.747	3.64	-9.107	-9.427	3.03e-05	0.000613	-3.21254	-4.51856	100.757	20	-120.757	-9.107	1	0.79	8.89	1.46	1.86
285	Dibutyl phthalate	000084-74-2	Kraft paper	595	2.77452	0.0566914	-1.24648	xxxxxxxxx	xxxxxxxxx	xxxxxxxxx	xxxxxxxxx	xxxxxxxxx	2.77452	-1.24648	25	298	(Chong-Xing Huang, Dan-Dan Duan, Meng-Meng Yan, Suang-Fei Wang, 2012)	Air	dimensionless	CCCCOC(=O)C1=CC=CC=C1C(=O)OCCCC	278.35	8.631	4.61	-4.021	-4.131	0.0303	0.00268	-2.57187	-1.51856	95.1218	20	-115.122	-4.021	0	0.8	9.09	1.4	2.27
424	styrene	000100-42-5	white cardboard	363	2.55991	35.5555	1.55091	xxxxxxxxx	xxxxxxxxx	xxxxxxxxx	xxxxxxxxx	xxxxxxxxx	2.55991	1.55091	25	298	(Chong-Xing Huang, Dan-Dan Duan, Meng-Meng Yan, Suang-Fei Wang, 2012)	Air	dimensionless	C=CC1=CC=CC=C1	104.15	3.899	2.89	-1.009	-0.949	674	853	2.93095	2.82866	46.7197	20	-66.7197	-1.009	0	0.17	3.86	0.7	0.96
717	4-Deoxypyridoxine	000148-51-6	white cardboard	933	2.96988	1.37683e-09	-8.86112	xxxxxxxxx	xxxxxxxxx	xxxxxxxxx	xxxxxxxxx	xxxxxxxxx	2.96988	-8.86112	25	298	(Chong-Xing Huang, Dan-Dan Duan, Meng-Meng Yan, Suang-Fei Wang, 2012)	Air	dimensionless	CC1=C(C(=NC=C1CO)C)O	153.18	12.331	0.5	-11.831	-11.831	0.00373	0.0184	-1.73518	-2.42829	87.7624	20	-107.762	-11.831	0.62	1.09	6.16	1.06	1.22
276	Diethyl phthalate	000084-66-2	white cardboard	555	2.74429	0.0235122	-1.62871	xxxxxxxxx	xxxxxxxxx	xxxxxxxxx	xxxxxxxxx	xxxxxxxxx	2.74429	-1.62871	25	298	(Chong-Xing Huang, Dan-Dan Duan, Meng-Meng Yan, Suang-Fei Wang, 2012)	Air	dimensionless	CCOC(=O)C1=CC=CC=C1C(=O)OCC	222.24	7.023	2.65	-4.373	-4.603	0.339	0.28	-0.552842	-0.4698	77.3627	20	-97.3627	-4.373	0	0.78	7.11	1.39	1.71
279	Diisobutyl phthalate	000084-69-5	white cardboard	536	2.72916	0.0598639	-1.22284	xxxxxxxxx	xxxxxxxxx	xxxxxxxxx	xxxxxxxxx	xxxxxxxxx	2.72916	-1.22284	25	298	(Chong-Xing Huang, Dan-Dan Duan, Meng-Meng Yan, Suang-Fei Wang, 2012)	Air	dimensionless	CC(C)COC(=O)C1=CC=CC=C1C(=O)OCC(C)C	278.35	8.412	4.46	-3.952	-4.302	0.322	0.321	-0.493495	-0.492144	76.8407	20	-96.8407	-3.952	0	0.85	8.86	1.37	2.27
262	bisphenol A	000080-05-7	white cardboard	1520	3.18184	1.18807e-06	-5.92516	xxxxxxxxx	xxxxxxxxx	xxxxxxxxx	xxxxxxxxx	xxxxxxxxx	3.18184	-5.92516	25	298	(Chong-Xing Huang, Dan-Dan Duan, Meng-Meng Yan, Suang-Fei Wang, 2012)	Air	dimensionless	CC(C)(C1=CC=C(C=C1)O)C2=CC=C(C=C2)O	228.29	12.747	3.64	-9.107	-9.427	3.03e-05	0.000613	-3.21254	-4.51856	100.757	20	-120.757	-9.107	1	0.79	8.89	1.46	1.86
286	Dibutyl phthalate	000084-74-2	white cardboard	666	2.82347	0.0634562	-1.19753	xxxxxxxxx	xxxxxxxxx	xxxxxxxxx	xxxxxxxxx	xxxxxxxxx	2.82347	-1.19753	25	298	(Chong-Xing Huang, Dan-Dan Duan, Meng-Meng Yan, Suang-Fei Wang, 2012)	Air	dimensionless	CCCCOC(=O)C1=CC=CC=C1C(=O)OCCCC	278.35	8.631	4.61	-4.021	-4.131	0.0303	0.00268	-2.57187	-1.51856	95.1218	20	-115.122	-4.021	0	0.8	9.09	1.4	2.27
1005	n-Butanol	004712-38-3	Vinyl flooring	810	2.90849	0.168434	-0.77357	xxxxxxxxx	xxxxxxxxx	xxxxxxxxx	xxxxxxxxx	xxxxxxxxx	2.76926	-0.713744	20	293	(Cox et al., 2001)	Air	dimensionless	CCCCO	74.12	4.323	0.84	-3.483	-3.443	1040	893	2.95085	3.01703	46.5447	20	-66.5447	-3.68206	0.31	0.31	2.58	0.46	0.73
517	Toluene	000108-88-3	Vinyl flooring	980	2.99123	112.899	2.05269	xxxxxxxxx	xxxxxxxxx	xxxxxxxxx	xxxxxxxxx	xxxxxxxxx	2.86851	2.11251	20	293	(Cox et al., 2001)	Air	dimensionless	CC1=CC=CC=C1	92.14	3.296	2.54	-0.756	-0.566	3160	3790	3.57864	3.49969	41.0227	20	-61.0227	-0.938537	0	0.12	3.43	0.63	0.86
525	Phenol	000108-95-2	Vinyl flooring	120000	5.07918	1.0828	0.0345488	xxxxxxxxx	xxxxxxxxx	xxxxxxxxx	xxxxxxxxx	xxxxxxxxx	4.91037	0.0943749	20	293	(Cox et al., 2001)	Air	dimensionless	C1=CC=C(C=C1)O	94.11	6.326	1.51	-4.816	-4.866	43	67.1	1.82672	1.63347	56.4324	20	-76.4324	-5.04463	0.5	0.39	3.78	0.9	0.78
661	n-Decane	000124-18-5	Vinyl flooring	3000	3.47712	665951	5.82344	xxxxxxxxx	xxxxxxxxx	xxxxxxxxx	xxxxxxxxx	xxxxxxxxx	3.32027	5.88327	20	293	(Cox et al., 2001)	Air	dimensionless	CCCCCCCCCC	142.29	2.687	5.25	2.563	2.323	231	191	2.28103	2.36361	52.4363	20	-72.4363	2.34632	0	0.05	4.71	0.21	1.52
582	n-Dodecane	000112-40-3	Vinyl flooring	17000	4.23045	4.37302e+06	6.64078	xxxxxxxxx	xxxxxxxxx	xxxxxxxxx	xxxxxxxxx	xxxxxxxxx	4.04661	6.70061	20	293	(Cox et al., 2001)	Air	dimensionless	CCCCCCCCCCCC	170.34	3.576	6.23	2.654	2.524	31.5	18	1.25527	1.49831	61.4588	20	-81.4588	2.41033	0	0.06	5.7	0.22	1.8
902	n-Tetradecane	000629-59-4	Vinyl flooring	120000	5.07918	2.52635e+07	7.40249	xxxxxxxxx	xxxxxxxxx	xxxxxxxxx	xxxxxxxxx	xxxxxxxxx	4.86732	7.46232	20	293	(Cox et al., 2001)	Air	dimensionless	CCCCCCCCCCCCCC	198.4	4.625	7.22	2.595	2.575	4.92	1.55	0.190332	0.691965	70.8259	20	-90.8259	2.32331	0	0.07	6.69	0.23	2.08
905	n-Pentadecane	000629-62-9	Vinyl flooring	420000	5.62325	1.121e+08	8.04961	xxxxxxxxx	xxxxxxxxx	xxxxxxxxx	xxxxxxxxx	xxxxxxxxx	5.39743	8.10943	20	293	(Cox et al., 2001)	Air	dimensionless	CCCCCCCCCCCCCCC	212.42	4.998	7.71	2.712	2.712	2.03	0.457	-0.340084	0.307496	75.4913	20	-95.4913	2.42636	0	0.07	7.18	0.23	2.22
148	trichloromethane	000067-66-3	POM	920.45	2.964	48.9779	1.69	xxxxxxxxx	xxxxxxxxx	xxxxxxxxx	xxxxxxxxx	xxxxxxxxx	2.964	1.69	25	298	(Endo, Hale, Goss, Arp 2011)	Water (Log)	dimensionless	C(Cl)(Cl)Cl	119.38	2.794	1.52	-1.274	-0.824	25100	26300	4.41996	4.39967	33.6226	20	-53.6226	-1.274	0.12	0	2.12	0.48	0.62
250	trichloroethene	000079-01-6	POM	285.102	2.455	128.825	2.11	xxxxxxxxx	xxxxxxxxx	xxxxxxxxx	xxxxxxxxx	xxxxxxxxx	2.455	2.11	25	298	(Endo, Hale, Goss, Arp 2011)	Water (Log)	dimensionless	C(=C(Cl)Cl)Cl	131.39	2.815	2.47	-0.345	-0.395	9660	9200	3.96379	3.98498	37.635	20	-57.635	-0.345	0	0.11	2.56	0.64	0.71
668	tetrachloroethene	000127-18-4	POM	1412.54	3.15	380.189	2.58	xxxxxxxxx	xxxxxxxxx	xxxxxxxxx	xxxxxxxxx	xxxxxxxxx	3.15	2.58	25	298	(Endo, Hale, Goss, Arp 2011)	Water (Log)	dimensionless	C(=C(Cl)Cl)(Cl)Cl	165.83	3.54	2.97	-0.57	-0.14	2370	2470	3.3927	3.37475	42.6583	20	-62.6583	-0.57	0	0.12	3.08	0.73	0.84
891	1-heptyne	000628-71-7	POM	93.1108	1.969	269.153	2.43	xxxxxxxxx	xxxxxxxxx	xxxxxxxxx	xxxxxxxxx	xxxxxxxxx	1.969	2.43	25	298	(Endo, Hale, Goss, Arp 2011)	Water (Log)	dimensionless	CCCCCC#C	96.17	2.549	3.01	0.461	0.461	5830	7000	3.8451	3.76567	38.679	20	-58.679	0.461	0.09	0.1	3.09	0.37	1.01
706	n-heptane	000142-82-5	POM	103.992	2.017	1122.02	3.05	xxxxxxxxx	xxxxxxxxx	xxxxxxxxx	xxxxxxxxx	xxxxxxxxx	2.017	3.05	25	298	(Endo, Hale, Goss, Arp 2011)	Water (Log)	dimensionless	CCCCCCC	100.21	2.747	3.78	1.033	1.913	6120	6130	3.78746	3.78675	39.186	20	-59.186	1.033	0	0.05	3.22	0.2	1.09
842	2,2,4-trimethylpentane	000540-84-1	POM	4.03645	0.606	501.187	2.7	xxxxxxxxx	xxxxxxxxx	xxxxxxxxx	xxxxxxxxx	xxxxxxxxx	0.606	2.7	25	298	(Endo, Hale, Goss, Arp 2011)	Water (Log)	dimensionless	CC(C)CC(C)(C)C	114.23	1.996	4.09	2.094	2.094	5950	6570	3.81757	3.77452	38.9212	20	-58.9212	2.094	0	0.11	3.27	0.12	1.24
793	cyCloheptane	000291-64-5	POM	85.1138	1.93	151.356	2.18	xxxxxxxxx	xxxxxxxxx	xxxxxxxxx	xxxxxxxxx	xxxxxxxxx	1.93	2.18	25	298	(Endo, Hale, Goss, Arp 2011)	Water (Log)	dimensionless	C1CCCCCC1	98.19	3.42	3.67	0.25	0.58	2680	2880	3.45939	3.42813	42.0716	20	-62.0716	0.25	0	0.02	3.51	0.28	0.99
556	n-octane	000111-65-9	POM	205.116	2.312	3311.31	3.52	xxxxxxxxx	xxxxxxxxx	xxxxxxxxx	xxxxxxxxx	xxxxxxxxx	2.312	3.52	25	298	(Endo, Hale, Goss, Arp 2011)	Water (Log)	dimensionless	CCCCCCCC	114.23	3.062	4.27	1.208	2.118	1980	1880	3.27416	3.29667	43.7009	20	-63.7009	1.208	0	0.05	3.72	0.2	1.24
526	phenol	000108-95-2	POM	394457	5.596	6.0256	0.78	xxxxxxxxx	xxxxxxxxx	xxxxxxxxx	xxxxxxxxx	xxxxxxxxx	5.596	0.78	25	298	(Endo, Hale, Goss, Arp 2011)	Water (Log)	dimensionless	C1=CC=C(C=C1)O	94.11	6.326	1.51	-4.816	-4.866	43	67.1	1.82672	1.63347	56.4324	20	-76.4324	-4.816	0.5	0.39	3.78	0.9	0.78
628	2,5-dimethylpyrazine	000123-32-0	POM	1253.14	3.098	0.457088	-0.34	xxxxxxxxx	xxxxxxxxx	xxxxxxxxx	xxxxxxxxx	xxxxxxxxx	3.098	-0.34	25	298	(Endo, Hale, Goss, Arp 2011)	Water (Log)	dimensionless	CC1=CN=C(C=N1)C	108.14	4.468	1.03	-3.438	-3.838	423	387	2.58771	2.62634	49.7388	20	-69.7388	-3.438	0	0.5	3.92	0.71	0.92
798	cyClooctane	000292-64-8	POM	35.8922	1.555	338.844	2.53	xxxxxxxxx	xxxxxxxxx	xxxxxxxxx	xxxxxxxxx	xxxxxxxxx	1.555	2.53	25	298	(Endo, Hale, Goss, Arp 2011)	Water (Log)	dimensionless	C1CCCCCCC1	112.22	3.185	4.16	0.975	1.265	715	735	2.86629	2.85431	47.2885	20	-67.2885	0.975	0	0.02	4.01	0.29	1.13
563	2-butoxyethanol	000111-76-2	POM	11587.8	4.064	0.416869	-0.38	xxxxxxxxx	xxxxxxxxx	xxxxxxxxx	xxxxxxxxx	xxxxxxxxx	4.064	-0.38	25	298	(Endo, Hale, Goss, Arp 2011)	Water (Log)	dimensionless	CCCCOCCO	118.18	5.014	0.57	-4.444	-4.184	63.3	117	2.06819	1.8014	54.3085	20	-74.3085	-4.444	0.23	0.63	4.04	0.56	1.07
562	1-heptanol	000111-70-6	POM	29107.2	4.464	10.9648	1.04	xxxxxxxxx	xxxxxxxxx	xxxxxxxxx	xxxxxxxxx	xxxxxxxxx	4.464	1.04	25	298	(Endo, Hale, Goss, Arp 2011)	Water (Log)	dimensionless	CCCCCCCO	116.21	5.734	2.31	-3.424	-3.114	39.8	31.2	1.49415	1.59988	59.3576	20	-79.3576	-3.424	0.31	0.32	4.07	0.47	1.15
714	di-n-butyl ether	000142-96-1	POM	309.03	2.49	47.863	1.68	xxxxxxxxx	xxxxxxxxx	xxxxxxxxx	xxxxxxxxx	xxxxxxxxx	2.49	1.68	25	298	(Endo, Hale, Goss, Arp 2011)	Water (Log)	dimensionless	CCCCOCCCC	130.23	3.82	3.01	-0.81	-0.61	1030	801	2.90363	3.01284	46.96	20	-66.96	-0.81	0	0.26	4.09	0.35	1.29
653	1-nonane	000124-11-8	POM	474.242	2.676	4570.88	3.66	xxxxxxxxx	xxxxxxxxx	xxxxxxxxx	xxxxxxxxx	xxxxxxxxx	2.676	3.66	25	298	(Endo, Hale, Goss, Arp 2011)	Water (Log)	dimensionless	CCCCCCCC=C	126.24	3.636	4.62	0.984	1.514	785	720	2.85733	2.89487	47.3673	20	-67.3673	0.984	0	0.1	4.15	0.26	1.33
569	n-nonane	000111-84-2	POM	703.072	2.847	12589.3	4.1	xxxxxxxxx	xxxxxxxxx	xxxxxxxxx	xxxxxxxxx	xxxxxxxxx	2.847	4.1	25	298	(Endo, Hale, Goss, Arp 2011)	Water (Log)	dimensionless	CCCCCCCCC	128.26	3.507	4.76	1.253	2.143	661	593	2.77305	2.8202	48.1086	20	-68.1086	1.253	0	0.05	4.21	0.2	1.38
866	3-ethyl-3-hexanol	000597-76-2	POM	4977.37	3.697	6.30957	0.8	xxxxxxxxx	xxxxxxxxx	xxxxxxxxx	xxxxxxxxx	xxxxxxxxx	3.697	0.8	25	298	(Endo, Hale, Goss, Arp 2011)	Water (Log)	dimensionless	CCCC(CC)(CC)O	130.23	5.587	2.69	-2.897	-2.897	102	91.5	1.96142	2.0086	55.2476	20	-75.2476	-2.897	0.31	0.36	4.23	0.41	1.29
549	2-octanone	000111-13-7	POM	7311.39	3.864	39.8107	1.6	xxxxxxxxx	xxxxxxxxx	xxxxxxxxx	xxxxxxxxx	xxxxxxxxx	3.864	1.6	25	298	(Endo, Hale, Goss, Arp 2011)	Water (Log)	dimensionless	CCCCCCC(=O)C	128.22	4.484	2.22	-2.264	-2.114	249	180	2.25527	2.3962	52.6629	20	-72.6629	-2.264	0	0.35	4.42	0.69	1.25
386	2-methylaniline	000095-53-4	POM	55207.7	4.742	8.91251	0.95	xxxxxxxxx	xxxxxxxxx	xxxxxxxxx	xxxxxxxxx	xxxxxxxxx	4.742	0.95	25	298	(Endo, Hale, Goss, Arp 2011)	Water (Log)	dimensionless	CC1=CC=CC=C1N	107.16	5.412	1.62	-3.792	-4.092	47.4	34.7	1.54033	1.67578	58.9515	20	-78.9515	-3.792	0.23	0.43	4.61	1.02	0.96
330	2-nitrotoluene	000088-72-2	POM	224905	5.352	131.826	2.12	xxxxxxxxx	xxxxxxxxx	xxxxxxxxx	xxxxxxxxx	xxxxxxxxx	5.352	2.12	25	298	(Endo, Hale, Goss, Arp 2011)	Water (Log)	dimensionless	CC1=CC=CC=C1[N+](=O)[O-]	137.14	5.592	2.36	-3.232	-3.292	15.8	25.1	1.39967	1.19866	60.1886	20	-80.1886	-3.232	0	0.21	4.91	1.2	1.03
933	4-chlorobenzyl alcohol	000873-76-7	POM	3.25087e+06	6.512	12.3027	1.09	xxxxxxxxx	xxxxxxxxx	xxxxxxxxx	xxxxxxxxx	xxxxxxxxx	6.512	1.09	25	298	(Endo, Hale, Goss, Arp 2011)	Water (Log)	dimensionless	C1=CC(=CC=C1CO)Cl	142.59	7.142	1.72	-5.422	-5.182	0.357	1.06	0.0253059	-0.447332	72.2774	20	-92.2774	-5.422	0.31	0.53	4.91	0.92	1.04
928	2-nonanone	000821-55-6	POM	19230.9	4.284	107.152	2.03	xxxxxxxxx	xxxxxxxxx	xxxxxxxxx	xxxxxxxxx	xxxxxxxxx	4.284	2.03	25	298	(Endo, Hale, Goss, Arp 2011)	Water (Log)	dimensionless	CCCCCCCC(=O)C	142.24	4.964	2.71	-2.254	-1.824	86.2	83.2	1.92012	1.93551	55.6108	20	-75.6108	-2.254	0	0.36	4.92	0.7	1.39
362	ethyl benzoate	000093-89-0	POM	66527.3	4.823	95.4993	1.98	xxxxxxxxx	xxxxxxxxx	xxxxxxxxx	xxxxxxxxx	xxxxxxxxx	4.823	1.98	25	298	(Endo, Hale, Goss, Arp 2011)	Water (Log)	dimensionless	CCOC(=O)C1=CC=CC=C1	150.18	5.163	2.32	-2.843	-2.523	26.3	35.6	1.55145	1.41996	58.8536	20	-78.8536	-2.843	0	0.45	5.03	1.04	1.21
921	di-n-pentyl ether	000693-65-2	POM	1018.59	3.008	346.737	2.54	xxxxxxxxx	xxxxxxxxx	xxxxxxxxx	xxxxxxxxx	xxxxxxxxx	3.008	2.54	25	298	(Endo, Hale, Goss, Arp 2011)	Water (Log)	dimensionless	CCCCCOCCCCC	158.29	4.468	4	-0.468	-0.468	111	114	2.0569	2.04532	54.4077	20	-74.4077	-0.468	0	0.27	5.08	0.36	1.58
466	1,4-dibromobenzene	000106-37-6	POM	42462	4.628	1479.11	3.17	xxxxxxxxx	xxxxxxxxx	xxxxxxxxx	xxxxxxxxx	xxxxxxxxx	4.628	3.17	25	298	(Endo, Hale, Goss, Arp 2011)	Water (Log)	dimensionless	C1=CC(=CC=C1Br)Br	235.91	5.228	3.77	-1.458	-1.438	4.1	31.7	1.50106	0.612784	59.2969	20	-79.2969	-1.458	0	0.1	5.24	1.05	1.07
404	4-nitroanisole	000100-17-4	POM	3.14775e+06	6.498	117.49	2.07	xxxxxxxxx	xxxxxxxxx	xxxxxxxxx	xxxxxxxxx	xxxxxxxxx	6.498	2.07	25	298	(Endo, Hale, Goss, Arp 2011)	Water (Log)	dimensionless	COC1=CC=C(C=C1)[N+](=O)[O-]	153.14	6.318	1.89	-4.428	-4.288	0.552	1.02	0.00860017	-0.258061	72.4244	20	-92.4244	-4.428	0	0.43	5.28	1.36	1.09
917	2-decanone	000693-54-9	POM	85506.7	4.932	371.535	2.57	xxxxxxxxx	xxxxxxxxx	xxxxxxxxx	xxxxxxxxx	xxxxxxxxx	4.932	2.57	25	298	(Endo, Hale, Goss, Arp 2011)	Water (Log)	dimensionless	CCCCCCCCC(=O)C	156.27	5.562	3.2	-2.362	-1.832	42.7	35.9	1.55509	1.63043	58.8216	20	-78.8216	-2.362	0	0.36	5.41	0.7	1.53
840	4-iodophenol	000540-38-5	POM	5.95662e+07	7.775	186.209	2.27	xxxxxxxxx	xxxxxxxxx	xxxxxxxxx	xxxxxxxxx	xxxxxxxxx	7.775	2.27	25	298	(Endo, Hale, Goss, Arp 2011)	Water (Log)	dimensionless	C1=CC(=CC=C1O)I	220.01	8.185	2.68	-5.505	-5.275	0.296	1.36	0.133539	-0.528708	71.3254	20	-91.3254	-5.505	0.67	0.4	5.47	1.16	1.03
448	acetanilide	000103-84-4	POM	7.21107e+06	6.858	1.58489	0.2	xxxxxxxxx	xxxxxxxxx	xxxxxxxxx	xxxxxxxxx	xxxxxxxxx	6.858	0.2	25	298	(Endo, Hale, Goss, Arp 2011)	Water (Log)	dimensionless	CC(=O)NC1=CC=CC=C1	135.17	7.758	1.1	-6.658	-6.598	0.0276	0.204	-0.69037	-1.55909	78.5724	20	-98.5724	-6.658	0.41	0.67	5.77	1.42	1.11
965	methyl phenyl sulfoxide	001193-82-4	POM	1.91426e+06	6.282	0.588844	-0.23	xxxxxxxxx	xxxxxxxxx	xxxxxxxxx	xxxxxxxxx	xxxxxxxxx	6.282	-0.23	25	298	(Endo, Hale, Goss, Arp 2011)	Water (Log)	dimensionless	CS(=O)C1=CC=CC=C1	140.2	6.942	0.43	-6.512	-6.392	1.53	1.77	0.247973	0.184691	70.3189	20	-90.3189	-6.512	0	0.8	6.07	1.83	1.08
945	valerophenone	001009-14-9	POM	328852	5.517	309.03	2.49	xxxxxxxxx	xxxxxxxxx	xxxxxxxxx	xxxxxxxxx	xxxxxxxxx	5.517	2.49	25	298	(Endo, Hale, Goss, Arp 2011)	Water (Log)	dimensionless	CCCCC(=O)C1=CC=CC=C1	162.23	6.177	3.15	-3.027	-3.027	4.74	4.59	0.661813	0.675778	66.6788	20	-86.6788	-3.027	0	0.43	6.11	1.14	1.44
334	1-naphthol	000090-15-3	POM	1.65959e+08	8.22	281.838	2.45	xxxxxxxxx	xxxxxxxxx	xxxxxxxxx	xxxxxxxxx	xxxxxxxxx	8.22	2.45	25	298	(Endo, Hale, Goss, Arp 2011)	Water (Log)	dimensionless	C1=CC=C2C(=C1)C=CC=C2O	144.17	8.46	2.69	-5.77	-5.61	0.0365	0.18	-0.744727	-1.43771	79.0505	20	-99.0505	-5.77	0.5	0.45	6.15	1.23	1.14
619	2,4-dinitritotoluene	000121-14-2	POM	9.46237e+07	7.976	331.131	2.52	xxxxxxxxx	xxxxxxxxx	xxxxxxxxx	xxxxxxxxx	xxxxxxxxx	7.976	2.52	25	298	(Endo, Hale, Goss, Arp 2011)	Water (Log)	dimensionless	CC1=C(C=C(C=C1)[N+](=O)[O-])[N+](=O)[O-]	182.14	7.636	2.18	-5.456	-5.656	0.0958	0.0559	-1.25259	-1.01863	83.5176	20	-103.518	-5.456	0	0.31	6.39	1.77	1.21
810	?ý-HCH	000319-85-7	POM	2.1727e+07	7.337	6025.6	3.78	xxxxxxxxx	xxxxxxxxx	xxxxxxxxx	xxxxxxxxx	xxxxxxxxx	7.337	3.78	25	298	(Endo, Hale, Goss, Arp 2011)	Water (Log)	dimensionless	C1(C(C(C(C(C1Cl)Cl)Cl)Cl)Cl)Cl	290.83	7.817	4.26	-3.557	-3.677	0.0674	0.0344	-1.46344	-1.17134	85.3722	20	-105.372	-3.557	0	0.4	7	1.1	1.58
814	??-HCH	000319-86-8	POM	2.1727e+07	7.337	6025.6	3.78	xxxxxxxxx	xxxxxxxxx	xxxxxxxxx	xxxxxxxxx	xxxxxxxxx	7.337	3.78	25	298	(Endo, Hale, Goss, Arp 2011)	Water (Log)	dimensionless	C1(C(C(C(C(C1Cl)Cl)Cl)Cl)Cl)Cl	290.83	7.817	4.26	-3.557	-3.677	0.0674	0.0344	-1.46344	-1.17134	85.3722	20	-105.372	-3.557	0	0.4	7	1.1	1.58
95	??-HCH	000058-89-9	POM	2.2751e+07	7.357	6309.57	3.8	xxxxxxxxx	xxxxxxxxx	xxxxxxxxx	xxxxxxxxx	xxxxxxxxx	7.357	3.8	25	298	(Endo, Hale, Goss, Arp 2011)	Water (Log)	dimensionless	C1(C(C(C(C(C1Cl)Cl)Cl)Cl)Cl)Cl	290.83	7.817	4.26	-3.557	-3.677	0.0674	0.0344	-1.46344	-1.17134	85.3722	20	-105.372	-3.557	0	0.4	7	1.1	1.58
806	?ñ-HCH	000319-84-6	POM	2.61216e+07	7.417	7244.36	3.86	xxxxxxxxx	xxxxxxxxx	xxxxxxxxx	xxxxxxxxx	xxxxxxxxx	7.417	3.86	25	298	(Endo, Hale, Goss, Arp 2011)	Water (Log)	dimensionless	C1(C(C(C(C(C1Cl)Cl)Cl)Cl)Cl)Cl	290.83	7.817	4.26	-3.557	-3.677	0.0674	0.0344	-1.46344	-1.17134	85.3722	20	-105.372	-3.557	0	0.4	7	1.1	1.58
335	2-phenylphenol	000090-43-7	POM	8.26038e+06	6.917	549.541	2.74	xxxxxxxxx	xxxxxxxxx	xxxxxxxxx	xxxxxxxxx	xxxxxxxxx	6.917	2.74	25	298	(Endo, Hale, Goss, Arp 2011)	Water (Log)	dimensionless	C1=CC=C(C=C1)C2=CC=CC=C2O	170.21	7.457	3.28	-4.177	-4.367	0.0941	0.579	-0.237321	-1.02641	74.5874	20	-94.5874	-4.177	0.5	0.49	7.12	1.37	1.38
598	benzophenone	000119-61-9	POM	7.26106e+06	6.861	537.032	2.73	xxxxxxxxx	xxxxxxxxx	xxxxxxxxx	xxxxxxxxx	xxxxxxxxx	6.861	2.73	25	298	(Endo, Hale, Goss, Arp 2011)	Water (Log)	dimensionless	C1=CC=C(C=C1)C(=O)C2=CC=CC=C2	182.22	7.281	3.15	-4.131	-4.101	0.121	0.432	-0.364516	-0.917215	75.7062	20	-95.7062	-4.131	0	0.51	7.31	1.59	1.48
88	caffeine	000058-08-2	POM	2.85102e+08	8.455	0.707946	-0.15	xxxxxxxxx	xxxxxxxxx	xxxxxxxxx	xxxxxxxxx	xxxxxxxxx	8.455	-0.15	25	298	(Endo, Hale, Goss, Arp 2011)	Water (Log)	dimensionless	CN1C=NC2=C1C(=O)N(C(=O)N2C)C	194.19	8.765	0.16	-8.605	-8.835	9.77e-07	0.000195	-3.70997	-6.01011	105.132	20	-125.132	-8.605	0	1.27	7.79	1.9	1.36
316	carbazole	000086-74-8	POM	2.06538e+08	8.315	3090.3	3.49	xxxxxxxxx	xxxxxxxxx	xxxxxxxxx	xxxxxxxxx	xxxxxxxxx	8.315	3.49	25	298	(Endo, Hale, Goss, Arp 2011)	Water (Log)	dimensionless	C1=CC=C2C(=C1)C3=CC=CC=C3N2	167.21	8.115	3.29	-4.825	-4.825	0.024	0.112	-0.950782	-1.61979	80.863	20	-100.863	-4.825	0.31	0.39	7.87	1.43	1.32
593	2,4,6-trinitrotoluene	000118-96-7	POM	4.16869e+08	8.62	870.964	2.94	xxxxxxxxx	xxxxxxxxx	xxxxxxxxx	xxxxxxxxx	xxxxxxxxx	8.62	2.94	25	298	(Endo, Hale, Goss, Arp 2011)	Water (Log)	dimensionless	CC1=C(C=C(C=C1[N+](=O)[O-])[N+](=O)[O-])[N+](=O)[O-]	227.13	7.67	1.99	-5.68	-6.07	0.00229	0.00375	-2.42597	-2.64016	93.8385	20	-113.839	-5.68	0	0.41	7.87	2.34	1.38
694	di-n-propyl phthalate	000131-16-8	POM	1.38995e+07	7.143	524.807	2.72	xxxxxxxxx	xxxxxxxxx	xxxxxxxxx	xxxxxxxxx	xxxxxxxxx	7.143	2.72	25	298	(Endo, Hale, Goss, Arp 2011)	Water (Log)	dimensionless	CCCOC(=O)C1=CC=CC=C1C(=O)OCCC	250.3	8.053	3.63	-4.423	-4.783	0.102	0.0176	-1.75449	-0.9914	87.9323	20	-107.932	-4.423	0	0.79	8.1	1.39	1.99
667	tri-n-butyl phosphate	000126-73-8	POM	1.94536e+06	6.289	74.131	1.87	xxxxxxxxx	xxxxxxxxx	xxxxxxxxx	xxxxxxxxx	xxxxxxxxx	6.289	1.87	25	298	(Endo, Hale, Goss, Arp 2011)	Water (Log)	dimensionless	CCCCOP(=O)(OCCCC)OCCCC	266.32	8.239	3.82	-4.419	-4.239	0.466	0.151	-0.821023	-0.331614	79.7216	20	-99.7216	-4.419	0	1.25	8.58	0.72	2.24
261	bisphenol A	000080-05-7	POM	5.45758e+11	11.737	426.58	2.63	xxxxxxxxx	xxxxxxxxx	xxxxxxxxx	xxxxxxxxx	xxxxxxxxx	11.737	2.63	25	298	(Endo, Hale, Goss, Arp 2011)	Water (Log)	dimensionless	CC(C)(C1=CC=C(C=C1)O)C2=CC=C(C=C2)O	228.29	12.747	3.64	-9.107	-9.427	3.03e-05	0.000613	-3.21254	-4.51856	100.757	20	-120.757	-9.107	1	0.79	8.89	1.46	1.86
237	heptachlor	000076-44-8	POM	2.5704e+06	6.41	75857.8	4.88	xxxxxxxxx	xxxxxxxxx	xxxxxxxxx	xxxxxxxxx	xxxxxxxxx	6.41	4.88	25	298	(Endo, Hale, Goss, Arp 2011)	Water (Log)	dimensionless	C1=CC(C2C1C3(C(=C(C2(C3(Cl)Cl)Cl)Cl)Cl)Cl)Cl	373.32	7.39	5.86	-1.53	-1.92	0.0317	0.265	-0.576754	-1.49894	77.5731	20	-97.5731	-1.53	0	0.42	8.96	1.27	1.96
201	4,4'-DDE	000072-55-9	POM	5.236e+08	8.719	275423	5.44	xxxxxxxxx	xxxxxxxxx	xxxxxxxxx	xxxxxxxxx	xxxxxxxxx	8.719	5.44	25	298	(Endo, Hale, Goss, Arp 2011)	Water (Log)	dimensionless	C1=CC(=CC=C1C(=C(Cl)Cl)C2=CC=C(C=C2)Cl)Cl	318.03	9.279	6	-3.279	-2.769	0.00913	0.00344	-2.46344	-2.03953	94.1681	20	-114.168	-3.279	0	0.3	9.38	1.53	2.05
955	heptachlor epoxide	001024-57-3	POM	2.48886e+07	7.396	8128.31	3.91	xxxxxxxxx	xxxxxxxxx	xxxxxxxxx	xxxxxxxxx	xxxxxxxxx	7.396	3.91	25	298	(Endo, Hale, Goss, Arp 2011)	Water (Log)	dimensionless	C12C(C(C3C1O3)Cl)C4(C(=C(C2(C4(Cl)Cl)Cl)Cl)Cl)Cl	389.32	8.046	4.56	-3.486	-3.066	0.0012	0.0563	-1.24949	-2.92082	83.4904	20	-103.49	-3.486	0	0.6	9.4	1.38	1.96
805	aldrin	000309-00-2	POM	2.82488e+06	6.451	44668.4	4.65	xxxxxxxxx	xxxxxxxxx	xxxxxxxxx	xxxxxxxxx	xxxxxxxxx	6.451	4.65	25	298	(Endo, Hale, Goss, Arp 2011)	Water (Log)	dimensionless	C1C2C=CC1C3C2C4(C(=C(C3(C4(Cl)Cl)Cl)Cl)Cl)Cl	364.92	7.861	6.06	-1.801	-1.801	0.00587	0.0528	-1.27737	-2.23136	83.7356	20	-103.736	-1.801	0	0.43	9.48	1.2	2.01
15	p,p??-DDT	000050-29-3	POM	1.77011e+09	9.248	457088	5.66	xxxxxxxxx	xxxxxxxxx	xxxxxxxxx	xxxxxxxxx	xxxxxxxxx	9.248	5.66	25	298	(Endo, Hale, Goss, Arp 2011)	Water (Log)	dimensionless	C1=CC(=CC=C1C(C2=CC=C(C=C2)Cl)C(Cl)(Cl)Cl)Cl	354.49	10.378	6.79	-3.588	-3.468	0.000996	0.000143	-3.84466	-3.00174	106.317	20	-126.317	-3.588	0	0.22	9.88	1.51	2.22
180	endrin	000072-20-8	POM	7.21107e+06	6.858	5248.07	3.72	xxxxxxxxx	xxxxxxxxx	xxxxxxxxx	xxxxxxxxx	xxxxxxxxx	6.858	3.72	25	298	(Endo, Hale, Goss, Arp 2011)	Water (Log)	dimensionless	C1C2C3C(C1C4C2O4)C5(C(=C(C3(C5(Cl)Cl)Cl)Cl)Cl)Cl	380.91	8.588	5.45	-3.138	-3.388	0.000365	0.0389	-1.41005	-3.43771	84.9026	20	-104.903	-3.138	0	0.61	9.92	1.31	2.01
118	dieldrin	000060-57-1	POM	1.0666e+07	7.028	7762.47	3.89	xxxxxxxxx	xxxxxxxxx	xxxxxxxxx	xxxxxxxxx	xxxxxxxxx	7.028	3.89	25	298	(Endo, Hale, Goss, Arp 2011)	Water (Log)	dimensionless	C1C2C3C(C1C4C2O4)C5(C(=C(C3(C5(Cl)Cl)Cl)Cl)Cl)Cl	380.91	8.588	5.45	-3.138	-3.388	0.000365	0.0389	-1.41005	-3.43771	84.9026	20	-104.903	-3.138	0	0.61	9.92	1.31	2.01
824	diazepam	000439-14-5	POM	5.8479e+08	8.767	66.0693	1.82	xxxxxxxxx	xxxxxxxxx	xxxxxxxxx	xxxxxxxxx	xxxxxxxxx	8.767	1.82	25	298	(Endo, Hale, Goss, Arp 2011)	Water (Log)	dimensionless	CN1C(=O)CN=C(C2=C1C=CC(=C2)Cl)C3=CC=CC=C3	284.75	9.647	2.7	-6.947	-6.827	1.35e-05	0.00016	-3.79588	-4.86967	105.888	20	-125.888	-6.947	0	1.04	11.13	1.72	2.07
38	estrone	000053-16-7	POM	1.69434e+10	10.229	524.807	2.72	xxxxxxxxx	xxxxxxxxx	xxxxxxxxx	xxxxxxxxx	xxxxxxxxx	10.229	2.72	25	298	(Endo, Hale, Goss, Arp 2011)	Water (Log)	dimensionless	CC12CCC3C(C1CCC2=O)CCC4=C3C=CC(=C4)O	270.37	10.939	3.43	-7.509	-7.809	0.679	253	2.40312	-0.16813	51.3625	20	-71.3625	-7.509	0.5	0.95	11.15	2.53	2.16
1086	endosulfan II	033213-65-9	POM	3.76704e+06	6.576	4677.35	3.67	xxxxxxxxx	xxxxxxxxx	xxxxxxxxx	xxxxxxxxx	xxxxxxxxx	6.576	3.67	25	298	(Endo, Hale, Goss, Arp 2011)	Water (Log)	dimensionless	C1C2C(COS(=O)O1)C3(C(=C(C2(C3(Cl)Cl)Cl)Cl)Cl)Cl	406.92	6.406	3.5	-2.906	-2.576	0.000166	0.000507	-3.29499	-3.77989	101.482	20	-121.482	-2.906	0	1.43	11.33	2.54	2.08
944	endosulfan I	000959-98-8	POM	1.24738e+07	7.096	15488.2	4.19	xxxxxxxxx	xxxxxxxxx	xxxxxxxxx	xxxxxxxxx	xxxxxxxxx	7.096	4.19	25	298	(Endo, Hale, Goss, Arp 2011)	Water (Log)	dimensionless	C1C2C(COS(=O)O1)C3(C(=C(C2(C3(Cl)Cl)Cl)Cl)Cl)Cl	406.92	6.406	3.5	-2.906	-2.576	0.000166	0.000507	-3.29499	-3.77989	101.482	20	-121.482	-2.906	0	1.43	11.33	2.54	2.08
601	Anthracene	000120-12-7	LDPE	1.94259e+07	7.28838	19952.6	4.3	0.92	7.25217	4.26379	1.78718e+07	18356.4	7.05449	4.31149	21	294	(Fernandez, MacFarlane, Tcaciuc, Gschwend, 2009)	Water (Log)	cm^3/g	C1=CC=C2C=C3C=CC=CC3=CC2=C1	178.24	7.093	4.35	-2.743	-2.643	0.000289	0.0659	-1.18111	-3.5391	82.8889	20	-102.889	-2.98838	0	0.23	7.71	1.34	1.45
292	Phenanthrene	000085-01-8	LDPE	2.59895e+07	7.4148	19952.6	4.3	0.92	7.37859	4.26379	2.39103e+07	18356.4	7.18349	4.31149	21	294	(Fernandez, MacFarlane, Tcaciuc, Gschwend, 2009)	Water (Log)	cm^3/g	C1=CC=C2C(=C1)C=CC3=CC=CC=C32	178.24	7.222	4.35	-2.872	-2.762	0.00576	0.0875	-1.05799	-2.23958	81.806	20	-101.806	-3.1148	0	0.23	7.71	1.34	1.45
1141	PCB-18	037680-65-2	LDPE	9.414e+06	6.97377	79432.8	4.9	0.92	6.93756	4.86379	8.66088e+06	73078.2	6.76249	4.91149	21	294	(Fernandez, MacFarlane, Tcaciuc, Gschwend, 2009)	Water (Log)	cm^3/g	C1=CC=C(C(=C1)C2=C(C=CC(=C2)Cl)Cl)Cl	257.55	7.541	5.69	-1.851	-1.991	0.00533	0.788	-0.103474	-2.27327	73.4101	20	-93.4101	-2.07377	0	0.19	8.1	1.43	1.69
1023	PCB-28	007012-37-5	LDPE	4.45217e+07	7.64857	251189	5.4	0.92	7.61236	5.36379	4.096e+07	231094	7.42849	5.41149	21	294	(Fernandez, MacFarlane, Tcaciuc, Gschwend, 2009)	Water (Log)	cm^3/g	C1=CC(=CC=C1C2=C(C=C(C=C2)Cl)Cl)Cl	257.55	7.707	5.69	-2.017	-2.087	0.00533	0.3	-0.522879	-2.27327	77.0992	20	-97.0992	-2.24857	0	0.15	8.1	1.39	1.69
1068	1-methyl phenanthrene	031711-53-2	LDPE	6.96395e+07	7.84286	50118.7	4.7	0.92	7.80664	4.66379	6.40683e+07	46109.2	7.59749	4.71149	21	294	(Fernandez, MacFarlane, Tcaciuc, Gschwend, 2009)	Water (Log)	cm^3/g	CC1=CC=CC2=C1C3=CC=CC=C3C=C2	192.26	7.776	4.89	-2.886	-2.696	0.00326	0.0187	-1.72816	-2.48678	87.7007	20	-107.701	-3.14286	0	0.23	8.18	1.28	1.6
879	2-methyl anthracene	000613-12-7	LDPE	8.79913e+06	6.94444	100000	5	0.92	6.90823	4.96379	8.0952e+06	92000	6.70749	5.01149	21	294	(Fernandez, MacFarlane, Tcaciuc, Gschwend, 2009)	Water (Log)	cm^3/g	CC1=CC2=CC3=CC=CC=C3C=C2C=C1	192.26	6.586	4.89	-1.696	-1.586	0.000343	0.0471	-1.32698	-3.46471	84.1719	20	-104.172	-1.94444	0	0.23	8.18	1.28	1.6
1126	PCB-52	035693-99-3	LDPE	3.97295e+07	7.59911	316228	5.5	0.92	7.5629	5.46379	3.65512e+07	290930	7.34849	5.51149	21	294	(Fernandez, MacFarlane, Tcaciuc, Gschwend, 2009)	Water (Log)	cm^3/g	C1=CC(=C(C=C1Cl)C2=C(C=CC(=C2)Cl)Cl)Cl	291.99	8.177	6.34	-1.837	-2.087	0.00113	0.0105	-1.97881	-2.94692	89.9054	20	-109.905	-2.09911	0	0.18	8.64	1.55	1.81
969	3,6-dimethyl phenanthrene	001576-67-6	LDPE	1.12488e+08	8.05111	158489	5.2	0.92	8.01489	5.16379	1.03489e+08	145810	7.80449	5.21149	21	294	(Fernandez, MacFarlane, Tcaciuc, Gschwend, 2009)	Water (Log)	cm^3/g	CC1=CC2=C(C=C1)C=CC3=C2C=C(C=C3)C	206.29	8.033	5.44	-2.593	-2.593	0.00101	0.0163	-1.78781	-2.99568	88.2254	20	-108.225	-2.85111	0	0.23	8.65	1.22	1.74
923	9,10-dimethyl anthracene	000781-43-1	LDPE	2.5183e+08	8.40111	199526	5.3	0.92	8.36489	5.26379	2.31683e+08	183564	8.15449	5.31149	21	294	(Fernandez, MacFarlane, Tcaciuc, Gschwend, 2009)	Water (Log)	cm^3/g	CC1=C2C=CC=CC2=C(C3=CC=CC=C13)C	206.29	8.283	5.44	-2.843	-2.593	0.000365	0.0163	-1.78781	-3.43771	88.2254	20	-108.225	-3.10111	0	0.23	8.65	1.22	1.74
1265	PCB-43	070362-46-8	LDPE	1.1327e+08	8.05411	316228	5.5	0.92	8.0179	5.46379	1.04208e+08	290930	7.80349	5.51149	21	294	(Fernandez, MacFarlane, Tcaciuc, Gschwend, 2009)	Water (Log)	cm^3/g	C1=CC=C(C(=C1)C2=CC(=CC(=C2Cl)Cl)Cl)Cl	291.99	8.632	6.34	-2.292	-2.292	0.00113	0.0105	-1.97881	-2.94692	89.9054	20	-109.905	-2.55411	0	0.12	8.76	1.5	1.81
1079	PCB-60	033025-41-1	LDPE	8.99733e+07	7.95411	794328	5.9	0.92	7.9179	5.86379	8.27754e+07	730782	7.70349	5.91149	21	294	(Fernandez, MacFarlane, Tcaciuc, Gschwend, 2009)	Water (Log)	cm^3/g	C1=CC(=CC=C1C2=C(C(=C(C=C2)Cl)Cl)Cl)Cl	291.99	8.132	6.34	-1.792	-2.292	0.00113	0.0105	-1.97881	-2.94692	89.9054	20	-109.905	-2.05411	0	0.13	8.9	1.47	1.81
676	Pyrene	000129-00-0	LDPE	1.67891e+08	8.22503	50118.7	4.7	0.92	8.18882	4.66379	1.5446e+08	46109.2	7.97449	4.71149	21	294	(Fernandez, MacFarlane, Tcaciuc, Gschwend, 2009)	Water (Log)	cm^3/g	C1=CC2=C3C(=C1)C=CC4=CC=CC(=C43)C=C2	202.26	8.193	4.93	-3.263	-3.313	4.59e-05	0.0106	-1.97469	-4.33819	89.8692	20	-109.869	-3.52503	0	0.25	9.11	1.52	1.58
754	fluoranthene	000206-44-0	LDPE	6.84647e+08	8.83547	79432.8	4.9	0.92	8.79925	4.86379	6.29875e+08	73078.2	8.58249	4.91149	21	294	(Fernandez, MacFarlane, Tcaciuc, Gschwend, 2009)	Water (Log)	cm^3/g	C1=CC=C2C(=C1)C3=CC=CC4=C3C2=CC=C4	202.26	8.601	4.93	-3.671	-3.441	0.000417	0.00811	-2.09098	-3.37986	90.892	20	-110.892	-3.93547	0	0.25	9.11	1.52	1.58
1147	PCB-101	037680-73-2	LDPE	5.05531e+08	8.70375	1.58489e+06	6.2	0.92	8.66754	6.16379	4.65089e+08	1.4581e+06	8.46549	6.21149	21	294	(Fernandez, MacFarlane, Tcaciuc, Gschwend, 2009)	Water (Log)	cm^3/g	C1=CC(=C(C=C1Cl)C2=CC(=C(C=C2Cl)Cl)Cl)Cl	326.44	9.234	6.98	-2.254	-2.434	0.000295	0.0408	-1.38934	-3.53018	84.7205	20	-104.72	-2.50375	0	0.11	9.3	1.61	1.94
1280	PCB-114	074472-37-0	LDPE	1.2432e+09	9.09454	2.51189e+06	6.4	0.92	9.05833	6.36379	1.14375e+09	2.31094e+06	8.83449	6.41149	21	294	(Fernandez, MacFarlane, Tcaciuc, Gschwend, 2009)	Water (Log)	cm^3/g	C1=CC(=CC=C1C2=CC(=C(C(=C2Cl)Cl)Cl)Cl)Cl	326.44	9.403	6.98	-2.423	-2.423	0.000729	0.00373	-2.42829	-3.13727	93.8589	20	-113.859	-2.69454	0	0.05	9.41	1.57	1.94
1272	PCB-109	070424-68-9	LDPE	6.23078e+08	8.79454	1.25893e+06	6.1	0.92	8.75833	6.06379	5.73232e+08	1.15821e+06	8.53449	6.11149	21	294	(Fernandez, MacFarlane, Tcaciuc, Gschwend, 2009)	Water (Log)	cm^3/g	C1=CC(=C(C=C1C2=CC(=CC(=C2Cl)Cl)Cl)Cl)Cl	326.44	9.403	6.98	-2.423	-2.423	0.000295	0.00373	-2.42829	-3.53018	93.8589	20	-113.859	-2.69454	0	0.11	9.5	1.59	1.94
1073	PCB-105	032598-14-4	LDPE	2.03717e+08	8.30903	1.99526e+06	6.3	0.92	8.27282	6.26379	1.8742e+08	1.83564e+06	8.05849	6.31149	21	294	(Fernandez, MacFarlane, Tcaciuc, Gschwend, 2009)	Water (Log)	cm^3/g	C1=CC(=C(C=C1C2=C(C(=C(C=C2)Cl)Cl)Cl)Cl)Cl	326.44	8.727	6.98	-1.747	-1.937	0.000295	0.0106	-1.97469	-3.53018	89.8692	20	-109.869	-2.00903	0	0.12	9.65	1.56	1.94
1101	PCB-153	035065-27-1	LDPE	6.64489e+09	9.82249	2.51189e+06	6.4	0.92	9.78628	6.36379	6.1133e+09	2.31094e+06	9.56849	6.41149	21	294	(Fernandez, MacFarlane, Tcaciuc, Gschwend, 2009)	Water (Log)	cm^3/g	C1=C(C(=CC(=C1Cl)Cl)Cl)C2=CC(=C(C=C2Cl)Cl)Cl	360.88	10.777	7.62	-3.157	-3.027	7.74e-05	0.00725	-2.13966	-4.11126	91.3202	20	-111.32	-3.42249	0	0.04	9.95	1.68	2.06
1200	PCB-146	051908-16-8	LDPE	2.35508e+09	9.37201	3.98107e+06	6.6	0.92	9.33579	6.56379	2.16668e+09	3.66259e+06	9.10249	6.61149	21	294	(Fernandez, MacFarlane, Tcaciuc, Gschwend, 2009)	Water (Log)	cm^3/g	C1=C(C=C(C(=C1Cl)Cl)C2=CC(=C(C=C2Cl)Cl)Cl)Cl	360.88	10.111	7.62	-2.491	-2.991	7.74e-05	0.00132	-2.87943	-4.11126	97.8271	20	-117.827	-2.77201	0	0.04	9.95	1.68	2.06
60	Benz[a]anthracene	000056-55-3	LDPE	2.2537e+09	9.3529	316228	5.5	0.92	9.31668	5.46379	2.07341e+09	290930	9.06049	5.51149	21	294	(Fernandez, MacFarlane, Tcaciuc, Gschwend, 2009)	Water (Log)	cm^3/g	C1=CC=C2C(=C1)C=CC3=CC4=CC=CC=C4C=C32	228.3	9.069	5.52	-3.549	-3.309	3.62e-05	0.000107	-3.97062	-4.44129	107.425	20	-127.425	-3.8529	0	0.29	10.08	1.66	1.82
782	Chrysene	000218-01-9	LDPE	5.75157e+09	9.75979	316228	5.5	0.92	9.72357	5.46379	5.29144e+09	290930	9.47149	5.51149	21	294	(Fernandez, MacFarlane, Tcaciuc, Gschwend, 2009)	Water (Log)	cm^3/g	C1=CC=C2C(=C1)C=CC3=C2C=CC4=CC=CC=C43	228.3	9.48	5.52	-3.96	-3.67	2.08e-07	0.000168	-3.77469	-6.68194	105.702	20	-125.702	-4.25979	0	0.29	10.08	1.66	1.82
1236	PCB-129	055215-18-4	LDPE	3.21371e+09	9.50701	3.98107e+06	6.6	0.92	9.47079	6.56379	2.95661e+09	3.66259e+06	9.23749	6.61149	21	294	(Fernandez, MacFarlane, Tcaciuc, Gschwend, 2009)	Water (Log)	cm^3/g	C1=CC(=C(C(=C1)Cl)Cl)C2=CC(=C(C(=C2Cl)Cl)Cl)Cl	360.88	10.246	7.62	-2.626	-2.926	7.74e-05	0.00132	-2.87943	-4.11126	97.8271	20	-117.827	-2.90701	0	0.04	10.16	1.65	2.06
1162	PCB-128	038380-07-3	LDPE	5.40947e+09	9.73315	3.16228e+06	6.5	0.92	9.69694	6.46379	4.97671e+09	2.9093e+06	9.47649	6.51149	21	294	(Fernandez, MacFarlane, Tcaciuc, Gschwend, 2009)	Water (Log)	cm^3/g	C1=CC(=C(C(=C1C2=C(C(=C(C=C2)Cl)Cl)Cl)Cl)Cl)Cl	360.88	10.585	7.62	-2.965	-3.275	7.74e-05	0.00541	-2.2668	-4.11126	92.4385	20	-112.439	-3.23315	0	0.05	10.25	1.62	2.06
1228	PCB-185	052712-05-7	LDPE	1.71629e+10	10.2346	1.25893e+07	7.1	0.92	10.1984	7.06379	1.57898e+10	1.15821e+07	9.95549	7.11149	21	294	(Fernandez, MacFarlane, Tcaciuc, Gschwend, 2009)	Water (Log)	cm^3/g	C1=CC(=C(C=C1Cl)C2=C(C(=C(C(=C2Cl)Cl)Cl)Cl)Cl)Cl	395.33	11.114	8.27	-2.844	-3.184	1.74e-05	0.000461	-3.3363	-4.75945	101.846	20	-121.846	-3.13459	0	0	10.51	1.79	2.18
1113	PCB-180	035065-29-3	LDPE	4.58539e+10	10.6614	10000000	7	0.92	10.6252	6.96379	4.21856e+10	9.2e+06	10.3995	7.01149	21	294	(Fernandez, MacFarlane, Tcaciuc, Gschwend, 2009)	Water (Log)	cm^3/g	C1=C(C(=CC(=C1Cl)Cl)Cl)C2=CC(=C(C(=C2Cl)Cl)Cl)Cl	395.33	11.658	8.27	-3.388	-3.388	1.74e-05	0.00305	-2.5157	-4.75945	94.6278	20	-114.628	-3.66138	0	0	10.61	1.75	2.18
1121	PCB-170	035065-30-6	LDPE	4.087e+10	10.6114	7.94328e+06	6.9	0.92	10.5752	6.86379	3.76004e+10	7.30782e+06	10.3455	6.91149	21	294	(Fernandez, MacFarlane, Tcaciuc, Gschwend, 2009)	Water (Log)	cm^3/g	C1=CC(=C(C(=C1C2=CC(=C(C(=C2Cl)Cl)Cl)Cl)Cl)Cl)Cl	395.33	11.704	8.27	-3.434	-3.434	1.74e-05	0.00196	-2.70774	-4.75945	96.317	20	-116.317	-3.7114	0	0	10.76	1.72	2.18
742	Benzo[b]fluoranthene	000205-99-2	LDPE	6.59997e+10	10.8195	1.99526e+06	6.3	0.92	10.7833	6.26379	6.07197e+10	1.83564e+06	10.5525	6.31149	21	294	(Fernandez, MacFarlane, Tcaciuc, Gschwend, 2009)	Water (Log)	cm^3/g	C1=CC=C2C3=C4C(=CC=C3)C5=CC=CC=C5C4=CC2=C1	252.32	10.351	6.11	-4.241	-4.571	3.32e-06	0.00173	-2.76195	-5.47886	96.7938	20	-116.794	-4.51954	0	0.31	11.48	1.84	1.95
771	Benzo[k]fluoranthene	000207-08-9	LDPE	1.7673e+11	11.2473	1.99526e+06	6.3	0.92	11.2111	6.26379	1.62591e+11	1.83564e+06	10.9335	6.31149	21	294	(Fernandez, MacFarlane, Tcaciuc, Gschwend, 2009)	Water (Log)	cm^3/g	C1=CC=C2C=C3C4=CC=CC5=C4C(=CC=C5)C3=CC2=C1	252.32	10.732	6.11	-4.622	-4.622	1.05e-07	1.02e-05	-4.9914	-6.97881	116.404	20	-136.404	-4.94731	0	0.31	11.48	1.84	1.95
27	Benzo[a]pyrene	000050-32-8	LDPE	2.92997e+11	11.4669	2.51189e+06	6.4	0.92	11.4307	6.36379	2.69557e+11	2.31094e+06	11.1605	6.41149	21	294	(Fernandez, MacFarlane, Tcaciuc, Gschwend, 2009)	Water (Log)	cm^3/g	C1=CC=C2C3=C4C(=CC2=C1)C=CC5=C4C(=CC=C5)C=C3	252.32	10.859	6.11	-4.749	-4.729	1.31e-07	2.31e-05	-4.63639	-6.88273	113.281	20	-133.281	-5.06686	0	0.31	11.48	1.84	1.95
948	p,p'-DDMU	001022-22-6	polyethylene	2.11813e+08	8.32595	234423	5.37	xxxxxxxxx	xxxxxxxxx	xxxxxxxxx	xxxxxxxxx	xxxxxxxxx	8.1167	5.4177	21	294	(Hale SE, Tomaszewski JE, Luthy RG, Werner D, 2009)	Water (Log)	dimensionless	C1=CC(=CC=C1C(=CCl)C2=CC=C(C=C2)Cl)Cl	283.59	8.199	5.5	-2.699	-2.699	0.00294	0.0185	-1.73283	-2.53165	87.7417	20	-107.742	-2.95595	0	0.28	8.86	1.45	1.93
205	o,p'-DDE	000072-55-9	polyethylene	4.58437e+09	9.66128	1.28825e+06	6.11	xxxxxxxxx	xxxxxxxxx	xxxxxxxxx	xxxxxxxxx	xxxxxxxxx	9.4367	6.1577	21	294	(Hale SE, Tomaszewski JE, Luthy RG, Werner D, 2009)	Water (Log)	dimensionless	C1=CC(=CC=C1C(=C(Cl)Cl)C2=CC=C(C=C2)Cl)Cl	318.03	9.279	6	-3.279	-2.769	0.00913	0.00344	-2.46344	-2.03953	94.1681	20	-114.168	-3.55128	0	0.3	9.38	1.53	2.05
216	p,p'-DDE	000072-55-9	polyethylene	6.62643e+09	9.82128	1.86209e+06	6.27	xxxxxxxxx	xxxxxxxxx	xxxxxxxxx	xxxxxxxxx	xxxxxxxxx	9.5967	6.3177	21	294	(Hale SE, Tomaszewski JE, Luthy RG, Werner D, 2009)	Water (Log)	dimensionless	C1=CC(=CC=C1C(=C(Cl)Cl)C2=CC=C(C=C2)Cl)Cl	318.03	9.279	6	-3.279	-2.769	0.00913	0.00344	-2.46344	-2.03953	94.1681	20	-114.168	-3.55128	0	0.3	9.38	1.53	2.05
197	p,p'-DDD	000072-54-8	polyethylene	2.09242e+09	9.32065	208930	5.32	xxxxxxxxx	xxxxxxxxx	xxxxxxxxx	xxxxxxxxx	xxxxxxxxx	9.0867	5.3677	21	294	(Hale SE, Tomaszewski JE, Luthy RG, Werner D, 2009)	Water (Log)	dimensionless	C1=CC(=CC=C1C(C2=CC=C(C=C2)Cl)C(Cl)Cl)Cl	320.05	9.589	5.87	-3.719	-3.569	0.0026	0.00123	-2.91009	-2.58503	98.0968	20	-118.097	-4.00065	0.09	0.22	9.45	1.44	2.1
188	o,p'-DDD	000072-54-8	polyethylene	2.34774e+09	9.37065	234423	5.37	xxxxxxxxx	xxxxxxxxx	xxxxxxxxx	xxxxxxxxx	xxxxxxxxx	9.1367	5.4177	21	294	(Hale SE, Tomaszewski JE, Luthy RG, Werner D, 2009)	Water (Log)	dimensionless	C1=CC(=CC=C1C(C2=CC=C(C=C2)Cl)C(Cl)Cl)Cl	320.05	9.589	5.87	-3.719	-3.569	0.0026	0.00123	-2.91009	-2.58503	98.0968	20	-118.097	-4.00065	0.09	0.22	9.45	1.44	2.1
23	p,p'-DDT	000050-29-3	polyethylene	9.31653e+09	9.96925	1.20226e+06	6.08	xxxxxxxxx	xxxxxxxxx	xxxxxxxxx	xxxxxxxxx	xxxxxxxxx	9.7157	6.1277	21	294	(Hale SE, Tomaszewski JE, Luthy RG, Werner D, 2009)	Water (Log)	dimensionless	C1=CC(=CC=C1C(C2=CC=C(C=C2)Cl)C(Cl)(Cl)Cl)Cl	354.49	10.378	6.79	-3.588	-3.468	0.000996	0.000143	-3.84466	-3.00174	106.317	20	-126.317	-3.88925	0	0.22	9.88	1.51	2.22
12	o,p'-DDT	000050-29-3	polyethylene	1.41011e+10	10.1493	1.8197e+06	6.26	xxxxxxxxx	xxxxxxxxx	xxxxxxxxx	xxxxxxxxx	xxxxxxxxx	9.8957	6.3077	21	294	(Hale SE, Tomaszewski JE, Luthy RG, Werner D, 2009)	Water (Log)	dimensionless	C1=CC(=CC=C1C(C2=CC=C(C=C2)Cl)C(Cl)(Cl)Cl)Cl	354.49	10.378	6.79	-3.588	-3.468	0.000996	0.000143	-3.84466	-3.00174	106.317	20	-126.317	-3.88925	0	0.22	9.88	1.51	2.22
815	??-HCH	000319-86-8	LDPE-26	1.18087e+06	6.0722	158.489	2.2	xxxxxxxxx	xxxxxxxxx	xxxxxxxxx	xxxxxxxxx	xxxxxxxxx	5.81683	2.25983	20	293	(Hale, Martin, Goss, Arp, Werner, 2010)	Water (Log)	dimensionless	C1(C(C(C(C(C1Cl)Cl)Cl)Cl)Cl)Cl	290.83	7.817	4.26	-3.557	-3.677	0.0674	0.0344	-1.46344	-1.17134	85.3722	20	-105.372	-3.8722	0	0.4	7	1.1	1.58
811	?ý-HCH	000319-85-7	LDPE-26	2.41102e+06	6.3822	323.594	2.51	xxxxxxxxx	xxxxxxxxx	xxxxxxxxx	xxxxxxxxx	xxxxxxxxx	6.12683	2.56983	20	293	(Hale, Martin, Goss, Arp, Werner, 2010)	Water (Log)	dimensionless	C1(C(C(C(C(C1Cl)Cl)Cl)Cl)Cl)Cl	290.83	7.817	4.26	-3.557	-3.677	0.0674	0.0344	-1.46344	-1.17134	85.3722	20	-105.372	-3.8722	0	0.4	7	1.1	1.58
96	??-HCH	000058-89-9	LDPE-26	3.10599e+06	6.4922	416.869	2.62	xxxxxxxxx	xxxxxxxxx	xxxxxxxxx	xxxxxxxxx	xxxxxxxxx	6.23683	2.67983	20	293	(Hale, Martin, Goss, Arp, Werner, 2010)	Water (Log)	dimensionless	C1(C(C(C(C(C1Cl)Cl)Cl)Cl)Cl)Cl	290.83	7.817	4.26	-3.557	-3.677	0.0674	0.0344	-1.46344	-1.17134	85.3722	20	-105.372	-3.8722	0	0.4	7	1.1	1.58
807	?ñ-HCH	000319-84-6	LDPE-26	4.70111e+06	6.6722	630.957	2.8	xxxxxxxxx	xxxxxxxxx	xxxxxxxxx	xxxxxxxxx	xxxxxxxxx	6.41683	2.85983	20	293	(Hale, Martin, Goss, Arp, Werner, 2010)	Water (Log)	dimensionless	C1(C(C(C(C(C1Cl)Cl)Cl)Cl)Cl)Cl	290.83	7.817	4.26	-3.557	-3.677	0.0674	0.0344	-1.46344	-1.17134	85.3722	20	-105.372	-3.8722	0	0.4	7	1.1	1.58
294	Phenanthrene	000085-01-8	LDPE-26	2.22092e+07	7.34653	14791.1	4.17	xxxxxxxxx	xxxxxxxxx	xxxxxxxxx	xxxxxxxxx	xxxxxxxxx	7.10183	4.22983	20	293	(Hale, Martin, Goss, Arp, Werner, 2010)	Water (Log)	dimensionless	C1=CC=C2C(=C1)C=CC3=CC=CC=C32	178.24	7.222	4.35	-2.872	-2.762	0.00576	0.0875	-1.05799	-2.23958	81.806	20	-101.806	-3.17653	0	0.23	7.71	1.34	1.45
603	Anthracene	000120-12-7	LDPE-26	2.4031e+07	7.38077	21379.6	4.33	xxxxxxxxx	xxxxxxxxx	xxxxxxxxx	xxxxxxxxx	xxxxxxxxx	7.13283	4.38983	20	293	(Hale, Martin, Goss, Arp, Werner, 2010)	Water (Log)	dimensionless	C1=CC=C2C=C3C=CC=CC3=CC2=C1	178.24	7.093	4.35	-2.743	-2.643	0.000289	0.0659	-1.18111	-3.5391	82.8889	20	-102.889	-3.05077	0	0.23	7.71	1.34	1.45
233	heptachlor	000076-44-8	LDPE-26	1.10121e+07	7.04187	165959	5.22	xxxxxxxxx	xxxxxxxxx	xxxxxxxxx	xxxxxxxxx	xxxxxxxxx	6.80983	5.27983	20	293	(Hale, Martin, Goss, Arp, Werner, 2010)	Water (Log)	dimensionless	C1=CC(C2C1C3(C(=C(C2(C3(Cl)Cl)Cl)Cl)Cl)Cl)Cl	373.32	7.39	5.86	-1.53	-1.92	0.0317	0.265	-0.576754	-1.49894	77.5731	20	-97.5731	-1.82187	0	0.42	8.96	1.27	1.96
679	Pyrene	000129-00-0	LDPE-26	3.99624e+08	8.60165	102329	5.01	xxxxxxxxx	xxxxxxxxx	xxxxxxxxx	xxxxxxxxx	xxxxxxxxx	8.33283	5.06983	20	293	(Hale, Martin, Goss, Arp, Werner, 2010)	Water (Log)	dimensionless	C1=CC2=C3C(=C1)C=CC4=CC=CC(=C43)C=C2	202.26	8.193	4.93	-3.263	-3.313	4.59e-05	0.0106	-1.97469	-4.33819	89.8692	20	-109.869	-3.59165	0	0.25	9.11	1.52	1.58
950	heptachlor epoxide	001024-57-3	LDPE-26	1.08535e+08	8.03557	17378	4.24	xxxxxxxxx	xxxxxxxxx	xxxxxxxxx	xxxxxxxxx	xxxxxxxxx	7.78583	4.29983	20	293	(Hale, Martin, Goss, Arp, Werner, 2010)	Water (Log)	dimensionless	C12C(C(C3C1O3)Cl)C4(C(=C(C2(C4(Cl)Cl)Cl)Cl)Cl)Cl	389.32	8.046	4.56	-3.486	-3.066	0.0012	0.0563	-1.24949	-2.92082	83.4904	20	-103.49	-3.79557	0	0.6	9.4	1.38	1.96
801	aldrin	000309-00-2	LDPE-26	6.62681e+06	6.8213	51286.1	4.71	xxxxxxxxx	xxxxxxxxx	xxxxxxxxx	xxxxxxxxx	xxxxxxxxx	6.57083	4.76983	20	293	(Hale, Martin, Goss, Arp, Werner, 2010)	Water (Log)	dimensionless	C1C2C=CC1C3C2C4(C(=C(C3(C4(Cl)Cl)Cl)Cl)Cl)Cl	364.92	7.861	6.06	-1.801	-1.801	0.00587	0.0528	-1.27737	-2.23136	83.7356	20	-103.736	-2.1113	0	0.43	9.48	1.2	2.01
176	endrin	000072-20-8	LDPE-26	7.97619e+07	7.9018	28183.8	4.45	xxxxxxxxx	xxxxxxxxx	xxxxxxxxx	xxxxxxxxx	xxxxxxxxx	7.64783	4.50983	20	293	(Hale, Martin, Goss, Arp, Werner, 2010)	Water (Log)	dimensionless	C1C2C3C(C1C4C2O4)C5(C(=C(C3(C5(Cl)Cl)Cl)Cl)Cl)Cl	380.91	8.588	5.45	-3.138	-3.388	0.000365	0.0389	-1.41005	-3.43771	84.9026	20	-104.903	-3.4518	0	0.61	9.92	1.31	2.01
114	dieldrin	000060-57-1	LDPE-26	1.59146e+08	8.2018	56234.1	4.75	xxxxxxxxx	xxxxxxxxx	xxxxxxxxx	xxxxxxxxx	xxxxxxxxx	7.94783	4.80983	20	293	(Hale, Martin, Goss, Arp, Werner, 2010)	Water (Log)	dimensionless	C1C2C3C(C1C4C2O4)C5(C(=C(C3(C5(Cl)Cl)Cl)Cl)Cl)Cl	380.91	8.588	5.45	-3.138	-3.388	0.000365	0.0389	-1.41005	-3.43771	84.9026	20	-104.903	-3.4518	0	0.61	9.92	1.31	2.01
956	endosulfan sulphate	001031-07-8	LDPE-26	1.47785e+08	8.16963	831.764	2.92	xxxxxxxxx	xxxxxxxxx	xxxxxxxxx	xxxxxxxxx	xxxxxxxxx	7.87683	2.97983	20	293	(Hale, Martin, Goss, Arp, Werner, 2010)	Water (Log)	dimensionless	C1C2C(COS(=O)(=O)O1)C3(C(=C(C2(C3(Cl)Cl)Cl)Cl)Cl)Cl	422.92	8.537	3.64	-4.897	-4.877	1.55e-05	0.0013	-2.88606	-4.80967	97.8854	20	-117.885	-5.24963	0	1.23	10.18	2.21	2.14
181	methoxychlor	000072-43-5	LDPE-26	1.58987e+09	9.20136	24547.1	4.39	xxxxxxxxx	xxxxxxxxx	xxxxxxxxx	xxxxxxxxx	xxxxxxxxx	8.94083	4.44983	20	293	(Hale, Martin, Goss, Arp, Werner, 2010)	Water (Log)	dimensionless	COC1=CC=C(C=C1)C(C2=CC=C(C=C2)OC)C(Cl)(Cl)Cl	345.66	10.161	5.67	-4.491	-5.081	0.00556	0.0219	-1.65956	-2.25493	87.0972	20	-107.097	-4.81136	0	0.65	10.32	1.55	2.37
1030	endrin aldehyde	007421-93-4	LDPE-26	7.84736e+06	6.89472	575.44	2.76	xxxxxxxxx	xxxxxxxxx	xxxxxxxxx	xxxxxxxxx	xxxxxxxxx	6.58683	2.81983	20	293	(Hale, Martin, Goss, Arp, Werner, 2010)	Water (Log)	dimensionless	C1C(C2C3C1C4C5(C2(C(C3(C45Cl)Cl)(Cl)Cl)Cl)Cl)C=O	380.91	8.567	4.8	-3.767	-3.767	0.00227	0.000347	-3.45967	-2.64397	102.931	20	-122.931	-4.13472	0	0.7	10.36	1.63	2.01
1231	endrin ketone	053494-70-5	LDPE-26	2.30702e+09	9.36305	912.011	2.96	xxxxxxxxx	xxxxxxxxx	xxxxxxxxx	xxxxxxxxx	xxxxxxxxx	9.10283	3.01983	20	293	(Hale, Martin, Goss, Arp, Werner, 2010)	Water (Log)	dimensionless	C1C2C3C4C1C(=O)C2C5(C3(C(C4(C5Cl)Cl)(Cl)Cl)Cl)Cl	380.91	10.023	3.94	-6.083	-6.083	0.00154	0.0225	-1.64782	-2.81248	86.994	20	-106.994	-6.40305	0	0.71	10.45	1.62	2.01
941	endosulfan I	000959-98-8	LDPE-26	5.61553e+07	7.74939	30199.5	4.48	xxxxxxxxx	xxxxxxxxx	xxxxxxxxx	xxxxxxxxx	xxxxxxxxx	7.44583	4.53983	20	293	(Hale, Martin, Goss, Arp, Werner, 2010)	Water (Log)	dimensionless	C1C2C(COS(=O)O1)C3(C(=C(C2(C3(Cl)Cl)Cl)Cl)Cl)Cl	406.92	6.406	3.5	-2.906	-2.576	0.000166	0.000507	-3.29499	-3.77989	101.482	20	-121.482	-3.26939	0	1.43	11.33	2.54	2.08
816	??-HCH	000319-86-8	LDPE-51	780190	5.8922	104.713	2.02	xxxxxxxxx	xxxxxxxxx	xxxxxxxxx	xxxxxxxxx	xxxxxxxxx	5.63683	2.07983	20	293	(Hale, Martin, Goss, Arp, Werner, 2010)	Water (Log)	dimensionless	C1(C(C(C(C(C1Cl)Cl)Cl)Cl)Cl)Cl	290.83	7.817	4.26	-3.557	-3.677	0.0674	0.0344	-1.46344	-1.17134	85.3722	20	-105.372	-3.8722	0	0.4	7	1.1	1.58
812	?ý-HCH	000319-85-7	LDPE-51	1.29479e+06	6.1122	173.78	2.24	xxxxxxxxx	xxxxxxxxx	xxxxxxxxx	xxxxxxxxx	xxxxxxxxx	5.85683	2.29983	20	293	(Hale, Martin, Goss, Arp, Werner, 2010)	Water (Log)	dimensionless	C1(C(C(C(C(C1Cl)Cl)Cl)Cl)Cl)Cl	290.83	7.817	4.26	-3.557	-3.677	0.0674	0.0344	-1.46344	-1.17134	85.3722	20	-105.372	-3.8722	0	0.4	7	1.1	1.58
97	??-HCH	000058-89-9	LDPE-51	3.10599e+06	6.4922	416.869	2.62	xxxxxxxxx	xxxxxxxxx	xxxxxxxxx	xxxxxxxxx	xxxxxxxxx	6.23683	2.67983	20	293	(Hale, Martin, Goss, Arp, Werner, 2010)	Water (Log)	dimensionless	C1(C(C(C(C(C1Cl)Cl)Cl)Cl)Cl)Cl	290.83	7.817	4.26	-3.557	-3.677	0.0674	0.0344	-1.46344	-1.17134	85.3722	20	-105.372	-3.8722	0	0.4	7	1.1	1.58
808	?ñ-HCH	000319-84-6	LDPE-51	4.70111e+06	6.6722	630.957	2.8	xxxxxxxxx	xxxxxxxxx	xxxxxxxxx	xxxxxxxxx	xxxxxxxxx	6.41683	2.85983	20	293	(Hale, Martin, Goss, Arp, Werner, 2010)	Water (Log)	dimensionless	C1(C(C(C(C(C1Cl)Cl)Cl)Cl)Cl)Cl	290.83	7.817	4.26	-3.557	-3.677	0.0674	0.0344	-1.46344	-1.17134	85.3722	20	-105.372	-3.8722	0	0.4	7	1.1	1.58
295	Phenanthrene	000085-01-8	LDPE-51	2.0255e+07	7.30653	13489.6	4.13	xxxxxxxxx	xxxxxxxxx	xxxxxxxxx	xxxxxxxxx	xxxxxxxxx	7.06183	4.18983	20	293	(Hale, Martin, Goss, Arp, Werner, 2010)	Water (Log)	dimensionless	C1=CC=C2C(=C1)C=CC3=CC=CC=C32	178.24	7.222	4.35	-2.872	-2.762	0.00576	0.0875	-1.05799	-2.23958	81.806	20	-101.806	-3.17653	0	0.23	7.71	1.34	1.45
604	Anthracene	000120-12-7	LDPE-51	2.04537e+07	7.31077	18197	4.26	xxxxxxxxx	xxxxxxxxx	xxxxxxxxx	xxxxxxxxx	xxxxxxxxx	7.06283	4.31983	20	293	(Hale, Martin, Goss, Arp, Werner, 2010)	Water (Log)	dimensionless	C1=CC=C2C=C3C=CC=CC3=CC2=C1	178.24	7.093	4.35	-2.743	-2.643	0.000289	0.0659	-1.18111	-3.5391	82.8889	20	-102.889	-3.05077	0	0.23	7.71	1.34	1.45
947	p,p'-DDMU	001022-22-6	LDPE-51	2.462e+08	8.39129	234423	5.37	xxxxxxxxx	xxxxxxxxx	xxxxxxxxx	xxxxxxxxx	xxxxxxxxx	8.12883	5.42983	20	293	(Hale, Martin, Goss, Arp, Werner, 2010)	Water (Log)	dimensionless	C1=CC(=CC=C1C(=CCl)C2=CC=C(C=C2)Cl)Cl	283.59	8.199	5.5	-2.699	-2.699	0.00294	0.0185	-1.73283	-2.53165	87.7417	20	-107.742	-3.02129	0	0.28	8.86	1.45	1.93
234	heptachlor	000076-44-8	LDPE-51	7.61852e+06	6.88187	114815	5.06	xxxxxxxxx	xxxxxxxxx	xxxxxxxxx	xxxxxxxxx	xxxxxxxxx	6.64983	5.11983	20	293	(Hale, Martin, Goss, Arp, Werner, 2010)	Water (Log)	dimensionless	C1=CC(C2C1C3(C(=C(C2(C3(Cl)Cl)Cl)Cl)Cl)Cl)Cl	373.32	7.39	5.86	-1.53	-1.92	0.0317	0.265	-0.576754	-1.49894	77.5731	20	-97.5731	-1.82187	0	0.42	8.96	1.27	1.96
680	Pyrene	000129-00-0	LDPE-51	3.56166e+08	8.55165	91201.1	4.96	xxxxxxxxx	xxxxxxxxx	xxxxxxxxx	xxxxxxxxx	xxxxxxxxx	8.28283	5.01983	20	293	(Hale, Martin, Goss, Arp, Werner, 2010)	Water (Log)	dimensionless	C1=CC2=C3C(=C1)C=CC4=CC=CC(=C43)C=C2	202.26	8.193	4.93	-3.263	-3.313	4.59e-05	0.0106	-1.97469	-4.33819	89.8692	20	-109.869	-3.59165	0	0.25	9.11	1.52	1.58
1002	o,p'-DDE	003424-82-6	LDPE-51	1.19172e+09	9.07617	416869	5.62	xxxxxxxxx	xxxxxxxxx	xxxxxxxxx	xxxxxxxxx	xxxxxxxxx	8.80083	5.67983	20	293	(Hale, Martin, Goss, Arp, Werner, 2010)	Water (Log)	dimensionless	C1=CC=C(C(=C1)C(=C(Cl)Cl)C2=CC=C(C=C2)Cl)Cl	318.03	9.121	6	-3.121	-3.121	0.00118	0.00599	-2.22257	-2.92812	92.0495	20	-112.049	-3.45617	0	0.3	9.38	1.53	2.05
202	4,4-DDE	000072-55-9	LDPE-51	2.4576e+09	9.39051	588844	5.77	xxxxxxxxx	xxxxxxxxx	xxxxxxxxx	xxxxxxxxx	xxxxxxxxx	9.10883	5.82983	20	293	(Hale, Martin, Goss, Arp, Werner, 2010)	Water (Log)	dimensionless	C1=CC(=CC=C1C(=C(Cl)Cl)C2=CC=C(C=C2)Cl)Cl	318.03	9.279	6	-3.279	-2.769	0.00913	0.00344	-2.46344	-2.03953	94.1681	20	-114.168	-3.62051	0	0.3	9.38	1.53	2.05
951	heptachlor epoxide	001024-57-3	LDPE-51	6.69223e+07	7.82557	10715.2	4.03	xxxxxxxxx	xxxxxxxxx	xxxxxxxxx	xxxxxxxxx	xxxxxxxxx	7.57583	4.08983	20	293	(Hale, Martin, Goss, Arp, Werner, 2010)	Water (Log)	dimensionless	C12C(C(C3C1O3)Cl)C4(C(=C(C2(C4(Cl)Cl)Cl)Cl)Cl)Cl	389.32	8.046	4.56	-3.486	-3.066	0.0012	0.0563	-1.24949	-2.92082	83.4904	20	-103.49	-3.79557	0	0.6	9.4	1.38	1.96
187	o,p'-DDD	000072-54-8	LDPE-51	9.16776e+08	8.96226	77624.7	4.89	xxxxxxxxx	xxxxxxxxx	xxxxxxxxx	xxxxxxxxx	xxxxxxxxx	8.66883	4.94983	20	293	(Hale, Martin, Goss, Arp, Werner, 2010)	Water (Log)	dimensionless	C1=CC(=CC=C1C(C2=CC=C(C=C2)Cl)C(Cl)Cl)Cl	320.05	9.589	5.87	-3.719	-3.569	0.0026	0.00123	-2.91009	-2.58503	98.0968	20	-118.097	-4.07226	0.09	0.22	9.45	1.44	2.1
39	2,4-DDD	000053-19-0	LDPE-51	5.93681e+08	8.77355	87096.4	4.94	xxxxxxxxx	xxxxxxxxx	xxxxxxxxx	xxxxxxxxx	xxxxxxxxx	8.47583	4.99983	20	293	(Hale, Martin, Goss, Arp, Werner, 2010)	Water (Log)	dimensionless	C1=CC=C(C(=C1)C(C2=CC=C(C=C2)Cl)C(Cl)Cl)Cl	320.05	9.346	5.87	-3.476	-3.476	0.00225	0.000845	-3.07314	-2.64782	99.531	20	-119.531	-3.83355	0.09	0.22	9.45	1.44	2.1
802	aldrin	000309-00-2	LDPE-51	3.90215e+06	6.5913	30199.5	4.48	xxxxxxxxx	xxxxxxxxx	xxxxxxxxx	xxxxxxxxx	xxxxxxxxx	6.34083	4.53983	20	293	(Hale, Martin, Goss, Arp, Werner, 2010)	Water (Log)	dimensionless	C1C2C=CC1C3C2C4(C(=C(C3(C4(Cl)Cl)Cl)Cl)Cl)Cl	364.92	7.861	6.06	-1.801	-1.801	0.00587	0.0528	-1.27737	-2.23136	83.7356	20	-103.736	-2.1113	0	0.43	9.48	1.2	2.01
14	p,p??-DDT	000050-29-3	LDPE-51	3.59628e+09	9.55585	389045	5.59	xxxxxxxxx	xxxxxxxxx	xxxxxxxxx	xxxxxxxxx	xxxxxxxxx	9.23783	5.64983	20	293	(Hale, Martin, Goss, Arp, Werner, 2010)	Water (Log)	dimensionless	C1=CC(=CC=C1C(C2=CC=C(C=C2)Cl)C(Cl)(Cl)Cl)Cl	354.49	10.378	6.79	-3.588	-3.468	0.000996	0.000143	-3.84466	-3.00174	106.317	20	-126.317	-3.96585	0	0.22	9.88	1.51	2.22
927	2,4-DDT	000789-02-6	LDPE-51	4.25305e+09	9.6287	575440	5.76	xxxxxxxxx	xxxxxxxxx	xxxxxxxxx	xxxxxxxxx	xxxxxxxxx	9.33883	5.81983	20	293	(Hale, Martin, Goss, Arp, Werner, 2010)	Water (Log)	dimensionless	C1=CC=C(C(=C1)C(C2=CC=C(C=C2)Cl)C(Cl)(Cl)Cl)Cl	354.49	10.309	6.79	-3.519	-3.519	0.000693	0.00168	-2.77469	-3.15927	96.9058	20	-116.906	-3.8687	0	0.22	9.88	1.51	2.22
177	endrin	000072-20-8	LDPE-51	5.51818e+07	7.7418	19498.4	4.29	xxxxxxxxx	xxxxxxxxx	xxxxxxxxx	xxxxxxxxx	xxxxxxxxx	7.48783	4.34983	20	293	(Hale, Martin, Goss, Arp, Werner, 2010)	Water (Log)	dimensionless	C1C2C3C(C1C4C2O4)C5(C(=C(C3(C5(Cl)Cl)Cl)Cl)Cl)Cl	380.91	8.588	5.45	-3.138	-3.388	0.000365	0.0389	-1.41005	-3.43771	84.9026	20	-104.903	-3.4518	0	0.61	9.92	1.31	2.01
115	dieldrin	000060-57-1	LDPE-51	9.15789e+07	7.9618	32359.4	4.51	xxxxxxxxx	xxxxxxxxx	xxxxxxxxx	xxxxxxxxx	xxxxxxxxx	7.70783	4.56983	20	293	(Hale, Martin, Goss, Arp, Werner, 2010)	Water (Log)	dimensionless	C1C2C3C(C1C4C2O4)C5(C(=C(C3(C5(Cl)Cl)Cl)Cl)Cl)Cl	380.91	8.588	5.45	-3.138	-3.388	0.000365	0.0389	-1.41005	-3.43771	84.9026	20	-104.903	-3.4518	0	0.61	9.92	1.31	2.01
957	endosulfan sulphate	001031-07-8	LDPE-51	1.14718e+08	8.05963	645.654	2.81	xxxxxxxxx	xxxxxxxxx	xxxxxxxxx	xxxxxxxxx	xxxxxxxxx	7.76683	2.86983	20	293	(Hale, Martin, Goss, Arp, Werner, 2010)	Water (Log)	dimensionless	C1C2C(COS(=O)(=O)O1)C3(C(=C(C2(C3(Cl)Cl)Cl)Cl)Cl)Cl	422.92	8.537	3.64	-4.897	-4.877	1.55e-05	0.0013	-2.88606	-4.80967	97.8854	20	-117.885	-5.24963	0	1.23	10.18	2.21	2.14
182	methoxychlor	000072-43-5	LDPE-51	1.09992e+09	9.04136	16982.4	4.23	xxxxxxxxx	xxxxxxxxx	xxxxxxxxx	xxxxxxxxx	xxxxxxxxx	8.78083	4.28983	20	293	(Hale, Martin, Goss, Arp, Werner, 2010)	Water (Log)	dimensionless	COC1=CC=C(C=C1)C(C2=CC=C(C=C2)OC)C(Cl)(Cl)Cl	345.66	10.161	5.67	-4.491	-5.081	0.00556	0.0219	-1.65956	-2.25493	87.0972	20	-107.097	-4.81136	0	0.65	10.32	1.55	2.37
1031	endrin aldehyde	007421-93-4	LDPE-51	4.95135e+06	6.69472	363.078	2.56	xxxxxxxxx	xxxxxxxxx	xxxxxxxxx	xxxxxxxxx	xxxxxxxxx	6.38683	2.61983	20	293	(Hale, Martin, Goss, Arp, Werner, 2010)	Water (Log)	dimensionless	C1C(C2C3C1C4C5(C2(C(C3(C45Cl)Cl)(Cl)Cl)Cl)Cl)C=O	380.91	8.567	4.8	-3.767	-3.767	0.00227	0.000347	-3.45967	-2.64397	102.931	20	-122.931	-4.13472	0	0.7	10.36	1.63	2.01
1232	endrin ketone	053494-70-5	LDPE-51	1.83253e+09	9.26305	724.436	2.86	xxxxxxxxx	xxxxxxxxx	xxxxxxxxx	xxxxxxxxx	xxxxxxxxx	9.00283	2.91983	20	293	(Hale, Martin, Goss, Arp, Werner, 2010)	Water (Log)	dimensionless	C1C2C3C4C1C(=O)C2C5(C3(C(C4(C5Cl)Cl)(Cl)Cl)Cl)Cl	380.91	10.023	3.94	-6.083	-6.083	0.00154	0.0225	-1.64782	-2.81248	86.994	20	-106.994	-6.40305	0	0.71	10.45	1.62	2.01
836	indane	000496-11-7	carbohydrates	206.538	2.315	3.31131	0.52	1.5	2.49109	0.696091	309.807	4.96697	2.49109	0.696091	25	298	(Hung, Lin, Chiou, 2010)	Water (Log)	cm^3/g	C1CC2=CC=CC=C2C1	118.18	5.265	3.47	-1.795	-2.085	142	196	2.29226	2.15229	52.3376	20	-72.3376	-1.795	0	0.1	4.68	0.67	1.03
856	2,6-dimethylnaphthalene	000581-42-0	carbohydrates	797.995	2.902	18.6209	1.27	1.5	3.07809	1.44609	1196.99	27.9313	3.07809	1.44609	25	298	(Hung, Lin, Chiou, 2010)	Water (Log)	cm^3/g	CC1=CC2=C(C=C1)C=C(C=C2)C	156.23	5.892	4.26	-1.632	-1.582	0.327	3.91	0.592177	-0.485452	67.2913	20	-87.2913	-1.632	0	0.17	6.28	0.9	1.37
851	1,5-dimethylnaphthalne	000571-61-9	carbohydrates	1836.54	3.264	19.9526	1.3	1.5	3.44009	1.47609	2754.81	29.9289	3.44009	1.47609	25	298	(Hung, Lin, Chiou, 2010)	Water (Log)	cm^3/g	CC1=CC=CC2=C1C=CC=C2C	156.23	6.224	4.26	-1.964	-1.844	0.467	2.44	0.38739	-0.330683	69.0926	20	-89.0926	-1.964	0	0.17	6.28	0.9	1.37
171	1,1,1-Trichloroethane	000071-55-6	Cellulose	0.762255	-0.1179	0.830042	-0.0809	1.5	0.0581913	0.0951913	1.14338	1.24506	0.0581913	0.0951913	25	298	(Hung, Lin, Chiou, 2010)	Water (Log)	cm^3/g	CC(Cl)(Cl)Cl	133.41	2.643	2.68	0.037	-0.153	14900	16500	4.21748	4.17319	35.4035	20	-55.4035	0.037	0	0.01	2.4	0.44	0.76
249	trichloroethylene	000079-01-6	Cellulose	2.3681	0.3744	1.07004	0.0294	1.5	0.550491	0.205491	3.55215	1.60506	0.550491	0.205491	25	298	(Hung, Lin, Chiou, 2010)	Water (Log)	cm^3/g	C(=C(Cl)Cl)Cl	131.39	2.815	2.47	-0.345	-0.395	9660	9200	3.96379	3.98498	37.635	20	-57.635	-0.345	0	0.11	2.56	0.64	0.71
49	carbon tetrachloride	000056-23-5	Cellulose	3.6141	0.558	1.65959	0.22	1.5	0.734091	0.396091	5.42115	2.48938	0.734091	0.396091	25	298	(Hung, Lin, Chiou, 2010)	Water (Log)	cm^3/g	C(Cl)(Cl)(Cl)Cl	153.82	2.778	2.44	-0.338	0.052	13300	15300	4.18469	4.12385	35.692	20	-55.692	-0.338	0	0	2.56	0.55	0.74
825	Fluorobenzene	000462-06-6	Cellulose	3.11172	0.493	0.660693	-0.18	1.5	0.669091	-0.00390874	4.66757	0.99104	0.669091	-0.00390874	25	298	(Hung, Lin, Chiou, 2010)	Water (Log)	cm^3/g	C1=CC=C(C=C1)F	96.11	2.863	2.19	-0.673	-0.593	9560	10300	4.01284	3.98046	37.2036	20	-57.2036	-0.673	0	0.12	2.89	0.66	0.73
170	benzene	000071-43-2	Cellulose	3.58922	0.555	0.590201	-0.229	1.5	0.731091	-0.0529087	5.38383	0.885302	0.731091	-0.0529087	25	298	(Hung, Lin, Chiou, 2010)	Water (Log)	cm^3/g	C1=CC=CC=C1	78.11	2.774	1.99	-0.784	-0.644	11600	12600	4.10037	4.06446	36.4337	20	-56.4337	-0.784	0	0.12	2.96	0.69	0.72
670	tetrachloroethene	000127-18-4	Cellulose	14.1254	1.15	3.80189	0.58	1.5	1.32609	0.756091	21.1881	5.70284	1.32609	0.756091	25	298	(Hung, Lin, Chiou, 2010)	Water (Log)	cm^3/g	C(=C(Cl)Cl)(Cl)Cl	165.83	3.54	2.97	-0.57	-0.14	2370	2470	3.3927	3.37475	42.6583	20	-62.6583	-0.57	0	0.12	3.08	0.73	0.84
509	Toluene	000108-88-3	Cellulose	7.36207	0.867	1.29122	0.111	1.5	1.04309	0.287091	11.0431	1.93683	1.04309	0.287091	25	298	(Hung, Lin, Chiou, 2010)	Water (Log)	cm^3/g	CC1=CC=CC=C1	92.14	3.296	2.54	-0.756	-0.566	3160	3790	3.57864	3.49969	41.0227	20	-61.0227	-0.756	0	0.12	3.43	0.63	0.86
257	1,1,2,2-tetrachloroethane	000079-34-5	Cellulose	85.6052	1.9325	0.810028	-0.0915	1.5	2.10859	0.0845913	128.408	1.21504	2.10859	0.0845913	25	298	(Hung, Lin, Chiou, 2010)	Water (Log)	cm^3/g	C(C(Cl)Cl)(Cl)Cl	167.85	4.214	2.19	-2.024	-1.824	629	1770	3.24797	2.79865	43.9312	20	-63.9312	-2.024	0.18	0.12	3.55	0.6	0.88
523	Chlorobenzene	000108-90-7	Cellulose	27.9254	1.446	2.23872	0.35	1.5	1.62209	0.526091	41.8882	3.35808	1.62209	0.526091	25	298	(Hung, Lin, Chiou, 2010)	Water (Log)	cm^3/g	C1=CC=C(C=C1)Cl	112.56	3.736	2.64	-1.096	-0.896	1240	1600	3.20412	3.09342	44.317	20	-64.317	-1.096	0	0.11	3.59	0.77	0.84
413	Styrene	000100-42-5	Cellulose	23.8781	1.378	2.33884	0.369	1.5	1.55409	0.545091	35.8172	3.50826	1.55409	0.545091	25	298	(Hung, Lin, Chiou, 2010)	Water (Log)	cm^3/g	C=CC1=CC=CC=C1	104.15	3.899	2.89	-1.009	-0.949	674	853	2.93095	2.82866	46.7197	20	-66.7197	-1.009	0	0.17	3.86	0.7	0.96
363	1,2-xylene	000095-47-6	Cellulose	15.6315	1.194	2.81838	0.45	1.5	1.37009	0.626091	23.4472	4.22757	1.37009	0.626091	25	298	(Hung, Lin, Chiou, 2010)	Water (Log)	cm^3/g	CC1=CC=CC=C1C	106.17	3.834	3.09	-0.744	-0.674	908	1070	3.02938	2.95809	45.8539	20	-65.8539	-0.744	0	0.12	3.9	0.58	1
468	1,4-xylene	000106-42-3	Cellulose	12.8825	1.11	3.16228	0.5	1.5	1.28609	0.676091	19.3237	4.74342	1.28609	0.676091	25	298	(Hung, Lin, Chiou, 2010)	Water (Log)	cm^3/g	CC1=CC=C(C=C1)C	106.17	3.7	3.09	-0.61	-0.55	916	1180	3.07188	2.9619	45.4801	20	-65.4801	-0.61	0	0.12	3.9	0.58	1
411	Ethylbenzene	000100-41-4	Cellulose	11.7761	1.071	2.8774	0.459	1.5	1.24709	0.635091	17.6641	4.3161	1.24709	0.635091	25	298	(Hung, Lin, Chiou, 2010)	Water (Log)	cm^3/g	CCC1=CC=CC=C1	106.17	3.642	3.03	-0.612	-0.492	1010	1280	3.10721	3.00432	45.1694	20	-65.1694	-0.612	0	0.12	3.92	0.64	1
229	pentachloroethane	000076-01-7	Cellulose	33.1894	1.521	2.04174	0.31	1.5	1.69709	0.486091	49.7842	3.06261	1.69709	0.486091	25	298	(Hung, Lin, Chiou, 2010)	Water (Log)	cm^3/g	C(C(Cl)(Cl)Cl)(Cl)Cl	202.3	4.321	3.11	-1.211	-1.101	338	467	2.66932	2.52892	49.021	20	-69.021	-1.211	0.09	0.13	4.05	0.67	1
471	1,4-dichlorobenzene	000106-46-7	Cellulose	71.7794	1.856	4.89779	0.69	1.5	2.03209	0.866091	107.669	7.34668	2.03209	0.866091	25	298	(Hung, Lin, Chiou, 2010)	Water (Log)	cm^3/g	C1=CC(=CC=C1Cl)Cl	147	4.446	3.28	-1.166	-1.006	88	429	2.63246	1.94448	49.3452	20	-69.3452	-1.166	0	0.1	4.13	0.88	0.96
124	Aniline	000062-53-3	Cellulose	6958.25	3.8425	0.869961	-0.0605	1.5	4.01859	0.115591	10437.4	1.30494	4.01859	0.115591	25	298	(Hung, Lin, Chiou, 2010)	Water (Log)	cm^3/g	C1=CC=C(C=C1)N	93.13	4.983	1.08	-3.903	-4.083	105	65.3	1.81491	2.02119	56.5363	20	-76.5363	-3.903	0.23	0.43	4.14	1.08	0.82
508	Bromobenzene	000108-86-1	Cellulose	33.5738	1.526	2.63027	0.42	1.5	1.70209	0.596091	50.3606	3.9454	1.70209	0.596091	25	298	(Hung, Lin, Chiou, 2010)	Water (Log)	cm^3/g	C1=CC=C(C=C1)Br	157.01	3.986	2.88	-1.106	-0.996	404	557	2.74586	2.60638	48.3478	20	-68.3478	-1.106	0	0.11	4.14	0.85	0.89
376	1,2-dichlorobenzene	000095-50-1	Cellulose	76.7361	1.885	4.2658	0.63	1.5	2.06109	0.806091	115.104	6.39869	2.06109	0.806091	25	298	(Hung, Lin, Chiou, 2010)	Water (Log)	cm^3/g	C1=CC=C(C(=C1)Cl)Cl	147	4.535	3.28	-1.255	-1.105	129	196	2.29226	2.11059	52.3376	20	-72.3376	-1.255	0	0.1	4.33	0.85	0.96
499	1,3,5-trimethylbenzene	000108-67-8	Cellulose	8.60994	0.935	5.01187	0.7	1.5	1.11109	0.876091	12.9149	7.51781	1.11109	0.876091	25	298	(Hung, Lin, Chiou, 2010)	Water (Log)	cm^3/g	CC1=CC(=CC(=C1)C)C	120.2	3.865	3.63	-0.235	-0.445	268	280	2.44716	2.42813	50.9751	20	-70.9751	-0.235	0	0.12	4.37	0.52	1.14
877	1-ethyl-2-methylbenzene	000611-14-3	Cellulose	21.677	1.336	5.49541	0.74	1.5	1.51209	0.916091	32.5156	8.24311	1.51209	0.916091	25	298	(Hung, Lin, Chiou, 2010)	Water (Log)	cm^3/g	CCC1=CC=CC=C1C	120.2	4.176	3.58	-0.596	-0.646	262	348	2.54158	2.4183	50.1446	20	-70.1446	-0.596	0	0.12	4.4	0.58	1.14
384	2-toluidine	000095-53-4	Cellulose	4709.77	3.673	0.760326	-0.119	1.5	3.84909	0.0570913	7064.66	1.14049	3.84909	0.0570913	25	298	(Hung, Lin, Chiou, 2010)	Water (Log)	cm^3/g	CC1=CC=CC=C1N	107.16	5.412	1.62	-3.792	-4.092	47.4	34.7	1.54033	1.67578	58.9515	20	-78.9515	-3.792	0.23	0.43	4.61	1.02	0.96
620	N,N-Dimethylaniline	000121-69-7	Cellulose	1158.78	3.064	1.94984	0.29	1.5	3.24009	0.466091	1738.17	2.92477	3.24009	0.466091	25	298	(Hung, Lin, Chiou, 2010)	Water (Log)	cm^3/g	CN(C)C1=CC=CC=C1	121.18	4.944	2.17	-2.774	-2.634	66.6	93.3	1.96988	1.82347	55.1732	20	-75.1732	-2.774	0	0.46	4.63	0.91	1.1
863	iodobenzene	000591-50-4	Cellulose	133.968	2.127	3.72392	0.571	1.5	2.30309	0.747091	200.952	5.58588	2.30309	0.747091	25	298	(Hung, Lin, Chiou, 2010)	Water (Log)	cm^3/g	C1=CC=C(C=C1)I	204.01	4.716	3.16	-1.556	-1.466	85.4	141	2.14922	1.93146	53.5957	20	-73.5957	-1.556	0	0.13	4.74	0.92	0.97
392	1,2,4,5-tetramethylbenzene	000095-93-2	Cellulose	26.0615	1.416	12.8825	1.11	1.5	1.59209	1.28609	39.0923	19.3237	1.59209	1.28609	25	298	(Hung, Lin, Chiou, 2010)	Water (Log)	cm^3/g	CC1=CC(=C(C=C1C)C)C	134.22	4.486	4.18	-0.306	-0.486	15.7	243	2.38561	1.1959	51.5165	20	-71.5165	-0.306	0	0.12	4.84	0.46	1.28
382	2-Chloroaniline	000095-51-2	Cellulose	9484.18	3.977	1.38038	0.14	1.5	4.15309	0.316091	14226.3	2.07058	4.15309	0.316091	25	298	(Hung, Lin, Chiou, 2010)	Water (Log)	cm^3/g	C1=CC=C(C(=C1)N)Cl	127.57	5.557	1.72	-3.837	-3.657	30.9	27.2	1.43457	1.48996	59.8817	20	-79.8817	-3.837	0.23	0.42	4.88	1.16	0.94
318	1,2,3-trichlorobenzene	000087-61-6	Cellulose	303.389	2.482	11.749	1.07	1.5	2.65809	1.24609	455.084	17.6235	2.65809	1.24609	25	298	(Hung, Lin, Chiou, 2010)	Water (Log)	cm^3/g	C1=CC(=C(C(=C1)Cl)Cl)Cl	181.45	5.342	3.93	-1.412	-1.292	9.58	53.6	1.72916	0.981366	57.2905	20	-77.2905	-1.412	0	0.04	4.93	0.92	1.08
911	1,2,3,4-tetrachlorobenzene	000634-66-2	Cellulose	950.605	2.978	27.5423	1.44	1.5	3.15409	1.61609	1425.91	41.3134	3.15409	1.61609	25	298	(Hung, Lin, Chiou, 2010)	Water (Log)	cm^3/g	C1=CC(=C(C(=C1Cl)Cl)Cl)Cl	215.89	6.108	4.57	-1.538	-1.508	1.8	8.68	0.93852	0.255273	64.2449	20	-84.2449	-1.538	0	0	5.44	1.02	1.21
326	hexamethylbenzene	000087-85-4	Cellulose	734.514	2.866	34.6737	1.54	1.5	3.04209	1.71609	1101.77	52.0105	3.04209	1.71609	25	298	(Hung, Lin, Chiou, 2010)	Water (Log)	cm^3/g	CC1=C(C(=C(C(=C1C)C)C)C)C	162.28	6.606	5.28	-1.326	-1.496	0.0619	2.88	0.459392	-1.20831	68.4592	20	-88.4592	-1.326	0	0.12	5.79	0.35	1.56
867	Pentachlorobenzene	000608-93-5	Cellulose	2466.04	3.392	79.4328	1.9	1.5	3.56809	2.07609	3699.06	119.149	3.56809	2.07609	25	298	(Hung, Lin, Chiou, 2010)	Water (Log)	cm^3/g	C1=C(C(=C(C(=C1Cl)Cl)Cl)Cl)Cl	250.34	6.712	5.22	-1.492	-1.542	0.227	0.54	-0.267606	-0.643974	74.8538	20	-94.8538	-1.492	0	0	6	1.13	1.33
691	Dimethylphthalate	000131-11-3	Cellulose	49773.7	4.697	0.460257	-0.337	1.5	4.87309	-0.160909	74660.6	0.690385	4.87309	-0.160909	25	298	(Hung, Lin, Chiou, 2010)	Water (Log)	cm^3/g	COC(=O)C1=CC=CC=C1C(=O)OC	194.19	6.694	1.66	-5.034	-5.094	0.616	0.411	-0.386158	-0.210419	75.8966	20	-95.8966	-5.034	0	0.78	6.12	1.38	1.43
358	Biphenyl	000092-52-4	Cellulose	1513.56	3.18	10.7152	1.03	1.5	3.35609	1.20609	2270.34	16.0728	3.35609	1.20609	25	298	(Hung, Lin, Chiou, 2010)	Water (Log)	cm^3/g	C1=CC=C(C=C1)C2=CC=CC=C2	154.21	5.91	3.76	-2.15	-1.9	0.999	3.24	0.510545	-0.000434512	68.0093	20	-88.0093	-2.15	0	0.21	6.3	1.16	1.32
985	4-chlorobiphenyl (PCB 3)	002051-62-9	Cellulose	2238.72	3.35	32.3594	1.51	1.5	3.52609	1.68609	3358.08	48.539	3.52609	1.68609	25	298	(Hung, Lin, Chiou, 2010)	Water (Log)	cm^3/g	C1=CC=C(C=C1)C2=CC=C(C=C2)Cl	188.66	6.24	4.4	-1.84	-1.63	0.117	4.77	0.678518	-0.931814	66.5318	20	-86.5318	-1.84	0	0.21	6.93	1.24	1.45
109	lindane	000058-89-9	Cellulose	36897.8	4.567	10.2329	1.01	1.5	4.74309	1.18609	55346.6	15.3494	4.74309	1.18609	25	298	(Hung, Lin, Chiou, 2010)	Water (Log)	cm^3/g	C1(C(C(C(C(C1Cl)Cl)Cl)Cl)Cl)Cl	290.83	7.817	4.26	-3.557	-3.677	0.0674	0.0344	-1.46344	-1.17134	85.3722	20	-105.372	-3.557	0	0.4	7	1.1	1.58
103	Hexachlorobenzene	000058-89-9	Cellulose	612350	5.787	169.824	2.23	1.5	5.96309	2.40609	918526	254.737	5.96309	2.40609	25	298	(Hung, Lin, Chiou, 2010)	Water (Log)	cm^3/g	C1(C(C(C(C(C1Cl)Cl)Cl)Cl)Cl)Cl	290.83	7.817	4.26	-3.557	-3.677	0.0674	0.0344	-1.46344	-1.17134	85.3722	20	-105.372	-3.557	0	0.4	7	1.1	1.58
272	diethyl phtalate	000084-66-2	Cellulose	16293	4.212	0.69024	-0.161	1.5	4.38809	0.0150913	24439.4	1.03536	4.38809	0.0150913	25	298	(Hung, Lin, Chiou, 2010)	Water (Log)	cm^3/g	CCOC(=O)C1=CC=CC=C1C(=O)OCC	222.24	7.023	2.65	-4.373	-4.603	0.339	0.28	-0.552842	-0.4698	77.3627	20	-97.3627	-4.373	0	0.78	7.11	1.39	1.71
1087	2,4??-dichlorobiphenyl (PCB 7)	033284-50-3	Cellulose	10739.9	4.031	95.4993	1.98	1.5	4.20709	2.15609	16109.8	143.249	4.20709	2.15609	25	298	(Hung, Lin, Chiou, 2010)	Water (Log)	cm^3/g	C1=CC=C(C=C1)C2=C(C=C(C=C2)Cl)Cl	223.1	7.101	5.05	-2.051	-1.941	0.0254	0.665	-0.177178	-1.59517	74.0584	20	-94.0584	-2.051	0	0.15	7.47	1.31	1.57
979	4,4??- dichlorobiphenyl (PCB 15)	002050-68-2	Cellulose	23442.3	4.37	125.893	2.1	1.5	4.54609	2.27609	35163.4	188.839	4.54609	2.27609	25	298	(Hung, Lin, Chiou, 2010)	Water (Log)	cm^3/g	C1=CC(=CC=C1C2=CC=C(C=C2)Cl)Cl	223.1	7.32	5.05	-2.27	-2.09	0.00572	1.21	0.0827854	-2.2426	71.7718	20	-91.7718	-2.27	0	0.21	7.56	1.32	1.57
1026	2,4,4??- trichlorobiphenyl (PCB 28)	007012-37-5	Cellulose	18492.7	4.267	177.828	2.25	1.5	4.44309	2.42609	27739	266.742	4.44309	2.42609	25	298	(Hung, Lin, Chiou, 2010)	Water (Log)	cm^3/g	C1=CC(=CC=C1C2=C(C=C(C=C2)Cl)Cl)Cl	257.55	7.707	5.69	-2.017	-2.087	0.00533	0.3	-0.522879	-2.27327	77.0992	20	-97.0992	-2.017	0	0.15	8.1	1.39	1.69
1134	2,2??,5,5??-tetrachlorobiphenyl (PCB 52)	035693-99-3	Cellulose	15739.8	4.197	229.087	2.36	1.5	4.37309	2.53609	23609.7	343.63	4.37309	2.53609	25	298	(Hung, Lin, Chiou, 2010)	Water (Log)	cm^3/g	C1=CC(=C(C=C1Cl)C2=C(C=CC(=C2)Cl)Cl)Cl	291.99	8.177	6.34	-1.837	-2.087	0.00113	0.0105	-1.97881	-2.94692	89.9054	20	-109.905	-1.837	0	0.18	8.64	1.55	1.81
231	heptachlor	000076-44-8	Cellulose	7943.28	3.9	234.423	2.37	1.5	4.07609	2.54609	11914.9	351.634	4.07609	2.54609	25	298	(Hung, Lin, Chiou, 2010)	Water (Log)	cm^3/g	C1=CC(C2C1C3(C(=C(C2(C3(Cl)Cl)Cl)Cl)Cl)Cl)Cl	373.32	7.39	5.86	-1.53	-1.92	0.0317	0.265	-0.576754	-1.49894	77.5731	20	-97.5731	-1.53	0	0.42	8.96	1.27	1.96
977	Dibutyl phtalate	001962-75-0	Cellulose	2.35505e+06	6.372	14.1254	1.15	1.5	6.54809	1.32609	3.53257e+06	21.1881	6.54809	1.32609	25	298	(Hung, Lin, Chiou, 2010)	Water (Log)	cm^3/g	CCCCOC(=O)C1=CC=C(C=C1)C(=O)OCCCC	278.35	9.832	4.61	-5.222	-4.302	0.034	0.034	-1.46852	-1.46852	85.4169	20	-105.417	-5.222	0	0.8	9.09	1.4	2.27
1145	2,2??,4,5,5??-pcb (PCB 101)	037680-73-2	Cellulose	145881	5.164	812.831	2.91	1.5	5.34009	3.08609	218822	1219.25	5.34009	3.08609	25	298	(Hung, Lin, Chiou, 2010)	Water (Log)	cm^3/g	C1=CC(=C(C=C1Cl)C2=CC(=C(C=C2Cl)Cl)Cl)Cl	326.44	9.234	6.98	-2.254	-2.434	0.000295	0.0408	-1.38934	-3.53018	84.7205	20	-104.72	-2.254	0	0.11	9.3	1.61	1.94
199	p,p??-DDE	000072-55-9	Cellulose	868960	5.939	457.088	2.66	1.5	6.11509	2.83609	1.30344e+06	685.632	6.11509	2.83609	25	298	(Hung, Lin, Chiou, 2010)	Water (Log)	cm^3/g	C1=CC(=CC=C1C(=C(Cl)Cl)C2=CC=C(C=C2)Cl)Cl	318.03	9.279	6	-3.279	-2.769	0.00913	0.00344	-2.46344	-2.03953	94.1681	20	-114.168	-3.279	0	0.3	9.38	1.53	2.05
79	chlordane	000057-74-9	Cellulose	141906	5.152	309.03	2.49	1.5	5.32809	2.66609	212859	463.544	5.32809	2.66609	25	298	(Hung, Lin, Chiou, 2010)	Water (Log)	cm^3/g	C1C2C(C(C1Cl)Cl)C3(C(=C(C2(C3(Cl)Cl)Cl)Cl)Cl)Cl	409.78	8.922	6.26	-2.662	-2.702	0.00267	0.00841	-2.0752	-2.57349	90.7532	20	-110.753	-2.662	0	0.45	9.76	1.31	2.13
8	p,p??-DDT	000050-29-3	Cellulose	2.67917e+06	6.428	691.831	2.84	1.5	6.60409	3.01609	4.01875e+06	1037.75	6.60409	3.01609	25	298	(Hung, Lin, Chiou, 2010)	Water (Log)	cm^3/g	C1=CC(=CC=C1C(C2=CC=C(C=C2)Cl)C(Cl)(Cl)Cl)Cl	354.49	10.378	6.79	-3.588	-3.468	0.000996	0.000143	-3.84466	-3.00174	106.317	20	-126.317	-3.588	0	0.22	9.88	1.51	2.22
119	dieldrin	000060-57-1	Cellulose	157761	5.198	114.815	2.06	1.5	5.37409	2.23609	236642	172.223	5.37409	2.23609	25	298	(Hung, Lin, Chiou, 2010)	Water (Log)	cm^3/g	C1C2C3C(C1C4C2O4)C5(C(=C(C3(C5(Cl)Cl)Cl)Cl)Cl)Cl	380.91	8.588	5.45	-3.138	-3.388	0.000365	0.0389	-1.41005	-3.43771	84.9026	20	-104.903	-3.138	0	0.61	9.92	1.31	2.01
175	1,1,1-Trichloroethane	000071-55-6	Starch	0.743875	-0.1285	0.810028	-0.0915	1.5	0.0475913	0.0845913	1.11581	1.21504	0.0475913	0.0845913	25	298	(Hung, Lin, Chiou, 2010)	Water (Log)	cm^3/g	CC(Cl)(Cl)Cl	133.41	2.643	2.68	0.037	-0.153	14900	16500	4.21748	4.17319	35.4035	20	-55.4035	0.037	0	0.01	2.4	0.44	0.76
248	trichloroethylene	000079-01-6	Starch	2.65583	0.4242	1.20005	0.0792	1.5	0.600291	0.255291	3.98374	1.80008	0.600291	0.255291	25	298	(Hung, Lin, Chiou, 2010)	Water (Log)	cm^3/g	C(=C(Cl)Cl)Cl	131.39	2.815	2.47	-0.345	-0.395	9660	9200	3.96379	3.98498	37.635	20	-57.635	-0.345	0	0.11	2.56	0.64	0.71
50	carbon tetrachloride	000056-23-5	Starch	3.69828	0.568	1.69824	0.23	1.5	0.744091	0.406091	5.54742	2.54737	0.744091	0.406091	25	298	(Hung, Lin, Chiou, 2010)	Water (Log)	cm^3/g	C(Cl)(Cl)(Cl)Cl	153.82	2.778	2.44	-0.338	0.052	13300	15300	4.18469	4.12385	35.692	20	-55.692	-0.338	0	0	2.56	0.55	0.74
830	Fluorobenzene	000462-06-6	Starch	3.48337	0.542	0.739605	-0.131	1.5	0.718091	0.0450913	5.22506	1.10941	0.718091	0.0450913	25	298	(Hung, Lin, Chiou, 2010)	Water (Log)	cm^3/g	C1=CC=C(C=C1)F	96.11	2.863	2.19	-0.673	-0.593	9560	10300	4.01284	3.98046	37.2036	20	-57.2036	-0.673	0	0.12	2.89	0.66	0.73
169	benzene	000071-43-2	Starch	3.64754	0.562	0.599791	-0.222	1.5	0.738091	-0.0459087	5.47131	0.899687	0.738091	-0.0459087	25	298	(Hung, Lin, Chiou, 2010)	Water (Log)	cm^3/g	C1=CC=CC=C1	78.11	2.774	1.99	-0.784	-0.644	11600	12600	4.10037	4.06446	36.4337	20	-56.4337	-0.784	0	0.12	2.96	0.69	0.72
669	tetrachloroethane	000127-18-4	Starch	15.8489	1.2	4.2658	0.63	1.5	1.37609	0.806091	23.7734	6.39869	1.37609	0.806091	25	298	(Hung, Lin, Chiou, 2010)	Water (Log)	cm^3/g	C(=C(Cl)Cl)(Cl)Cl	165.83	3.54	2.97	-0.57	-0.14	2370	2470	3.3927	3.37475	42.6583	20	-62.6583	-0.57	0	0.12	3.08	0.73	0.84
516	Toluene	000108-88-3	Starch	7.53356	0.877	1.3213	0.121	1.5	1.05309	0.297091	11.3003	1.98194	1.05309	0.297091	25	298	(Hung, Lin, Chiou, 2010)	Water (Log)	cm^3/g	CC1=CC=CC=C1	92.14	3.296	2.54	-0.756	-0.566	3160	3790	3.57864	3.49969	41.0227	20	-61.0227	-0.756	0	0.12	3.43	0.63	0.86
258	1,1,2,2-tetrachloroethane	000079-34-5	Starch	116.252	2.0654	1.10002	0.0414	1.5	2.24149	0.217491	174.378	1.65003	2.24149	0.217491	25	298	(Hung, Lin, Chiou, 2010)	Water (Log)	cm^3/g	C(C(Cl)Cl)(Cl)Cl	167.85	4.214	2.19	-2.024	-1.824	629	1770	3.24797	2.79865	43.9312	20	-63.9312	-2.024	0.18	0.12	3.55	0.6	0.88
522	Chlorobenzene	000108-90-7	Starch	27.9254	1.446	2.23872	0.35	1.5	1.62209	0.526091	41.8882	3.35808	1.62209	0.526091	25	298	(Hung, Lin, Chiou, 2010)	Water (Log)	cm^3/g	C1=CC=C(C=C1)Cl	112.56	3.736	2.64	-1.096	-0.896	1240	1600	3.20412	3.09342	44.317	20	-64.317	-1.096	0	0.11	3.59	0.77	0.84
421	Styrene	000100-42-5	Starch	25.6448	1.409	2.51189	0.4	1.5	1.58509	0.576091	38.4673	3.76783	1.58509	0.576091	25	298	(Hung, Lin, Chiou, 2010)	Water (Log)	cm^3/g	C=CC1=CC=CC=C1	104.15	3.899	2.89	-1.009	-0.949	674	853	2.93095	2.82866	46.7197	20	-66.7197	-1.009	0	0.17	3.86	0.7	0.96
364	1,2-xylene	000095-47-6	Starch	15.9588	1.203	2.8774	0.459	1.5	1.37909	0.635091	23.9382	4.3161	1.37909	0.635091	25	298	(Hung, Lin, Chiou, 2010)	Water (Log)	cm^3/g	CC1=CC=CC=C1C	106.17	3.834	3.09	-0.744	-0.674	908	1070	3.02938	2.95809	45.8539	20	-65.8539	-0.744	0	0.12	3.9	0.58	1
467	1,4-xylene	000106-42-3	Starch	13.8038	1.14	3.38844	0.53	1.5	1.31609	0.706091	20.7058	5.08266	1.31609	0.706091	25	298	(Hung, Lin, Chiou, 2010)	Water (Log)	cm^3/g	CC1=CC=C(C=C1)C	106.17	3.7	3.09	-0.61	-0.55	916	1180	3.07188	2.9619	45.4801	20	-65.4801	-0.61	0	0.12	3.9	0.58	1
409	Ethylbenzene	000100-41-4	Starch	11.7761	1.071	2.8774	0.459	1.5	1.24709	0.635091	17.6641	4.3161	1.24709	0.635091	25	298	(Hung, Lin, Chiou, 2010)	Water (Log)	cm^3/g	CCC1=CC=CC=C1	106.17	3.642	3.03	-0.612	-0.492	1010	1280	3.10721	3.00432	45.1694	20	-65.1694	-0.612	0	0.12	3.92	0.64	1
228	pentachloroethane	000076-01-7	Starch	33.1894	1.521	2.04174	0.31	1.5	1.69709	0.486091	49.7842	3.06261	1.69709	0.486091	25	298	(Hung, Lin, Chiou, 2010)	Water (Log)	cm^3/g	C(C(Cl)(Cl)Cl)(Cl)Cl	202.3	4.321	3.11	-1.211	-1.101	338	467	2.66932	2.52892	49.021	20	-69.021	-1.211	0.09	0.13	4.05	0.67	1
470	1,4-dichlorobenzene	000106-46-7	Starch	75.1623	1.876	5.12861	0.71	1.5	2.05209	0.886091	112.743	7.69292	2.05209	0.886091	25	298	(Hung, Lin, Chiou, 2010)	Water (Log)	cm^3/g	C1=CC(=CC=C1Cl)Cl	147	4.446	3.28	-1.166	-1.006	88	429	2.63246	1.94448	49.3452	20	-69.3452	-1.166	0	0.1	4.13	0.88	0.96
123	Aniline	000062-53-3	Starch	6958.25	3.8425	0.869961	-0.0605	1.5	4.01859	0.115591	10437.4	1.30494	4.01859	0.115591	25	298	(Hung, Lin, Chiou, 2010)	Water (Log)	cm^3/g	C1=CC=C(C=C1)N	93.13	4.983	1.08	-3.903	-4.083	105	65.3	1.81491	2.02119	56.5363	20	-76.5363	-3.903	0.23	0.43	4.14	1.08	0.82
507	Bromobenzene	000108-86-1	Starch	38.5478	1.586	3.01995	0.48	1.5	1.76209	0.656091	57.8218	4.52993	1.76209	0.656091	25	298	(Hung, Lin, Chiou, 2010)	Water (Log)	cm^3/g	C1=CC=C(C=C1)Br	157.01	3.986	2.88	-1.106	-0.996	404	557	2.74586	2.60638	48.3478	20	-68.3478	-1.106	0	0.11	4.14	0.85	0.89
375	1,2-dichlorobenzene	000095-50-1	Starch	86.0994	1.935	4.7863	0.68	1.5	2.11109	0.856091	129.149	7.17945	2.11109	0.856091	25	298	(Hung, Lin, Chiou, 2010)	Water (Log)	cm^3/g	C1=CC=C(C(=C1)Cl)Cl	147	4.535	3.28	-1.255	-1.105	129	196	2.29226	2.11059	52.3376	20	-72.3376	-1.255	0	0.1	4.33	0.85	0.96
498	1,3,5-trimethylbenzene	000108-67-8	Starch	8.81049	0.945	5.12861	0.71	1.5	1.12109	0.886091	13.2157	7.69292	1.12109	0.886091	25	298	(Hung, Lin, Chiou, 2010)	Water (Log)	cm^3/g	CC1=CC(=CC(=C1)C)C	120.2	3.865	3.63	-0.235	-0.445	268	280	2.44716	2.42813	50.9751	20	-70.9751	-0.235	0	0.12	4.37	0.52	1.14
878	1-ethyl-2-methylbenzene	000611-14-3	Starch	23.7684	1.376	6.0256	0.78	1.5	1.55209	0.956091	35.6526	9.03839	1.55209	0.956091	25	298	(Hung, Lin, Chiou, 2010)	Water (Log)	cm^3/g	CCC1=CC=CC=C1C	120.2	4.176	3.58	-0.596	-0.646	262	348	2.54158	2.4183	50.1446	20	-70.1446	-0.596	0	0.12	4.4	0.58	1.14
385	2-toluidine	000095-53-4	Starch	8184.65	3.913	1.3213	0.121	1.5	4.08909	0.297091	12277	1.98194	4.08909	0.297091	25	298	(Hung, Lin, Chiou, 2010)	Water (Log)	cm^3/g	CC1=CC=CC=C1N	107.16	5.412	1.62	-3.792	-4.092	47.4	34.7	1.54033	1.67578	58.9515	20	-78.9515	-3.792	0.23	0.43	4.61	1.02	0.96
623	N,N-Dimethylaniline	000121-69-7	Starch	1035.14	3.015	1.74181	0.241	1.5	3.19109	0.417091	1552.71	2.61271	3.19109	0.417091	25	298	(Hung, Lin, Chiou, 2010)	Water (Log)	cm^3/g	CN(C)C1=CC=CC=C1	121.18	4.944	2.17	-2.774	-2.634	66.6	93.3	1.96988	1.82347	55.1732	20	-75.1732	-2.774	0	0.46	4.63	0.91	1.1
862	iodobenzene	000591-50-4	Starch	136.773	2.136	3.80189	0.58	1.5	2.31209	0.756091	205.159	5.70284	2.31209	0.756091	25	298	(Hung, Lin, Chiou, 2010)	Water (Log)	cm^3/g	C1=CC=C(C=C1)I	204.01	4.716	3.16	-1.556	-1.466	85.4	141	2.14922	1.93146	53.5957	20	-73.5957	-1.556	0	0.13	4.74	0.92	0.97
393	1,2,4,5-tetramethylbenzene	000095-93-2	Starch	27.2898	1.436	13.4896	1.13	1.5	1.61209	1.30609	40.9347	20.2344	1.61209	1.30609	25	298	(Hung, Lin, Chiou, 2010)	Water (Log)	cm^3/g	CC1=CC(=C(C=C1C)C)C	134.22	4.486	4.18	-0.306	-0.486	15.7	243	2.38561	1.1959	51.5165	20	-71.5165	-0.306	0	0.12	4.84	0.46	1.28
381	2-Chloroaniline	000095-51-2	Starch	10864.3	4.036	1.58125	0.199	1.5	4.21209	0.375091	16296.4	2.37187	4.21209	0.375091	25	298	(Hung, Lin, Chiou, 2010)	Water (Log)	cm^3/g	C1=CC=C(C(=C1)N)Cl	127.57	5.557	1.72	-3.837	-3.657	30.9	27.2	1.43457	1.48996	59.8817	20	-79.8817	-3.837	0.23	0.42	4.88	1.16	0.94
317	1,2,3-trichlorobenzene	000087-61-6	Starch	332.66	2.522	12.8825	1.11	1.5	2.69809	1.28609	498.989	19.3237	2.69809	1.28609	25	298	(Hung, Lin, Chiou, 2010)	Water (Log)	cm^3/g	C1=CC(=C(C(=C1)Cl)Cl)Cl	181.45	5.342	3.93	-1.412	-1.292	9.58	53.6	1.72916	0.981366	57.2905	20	-77.2905	-1.412	0	0.04	4.93	0.92	1.08
913	1,2,3,4-tetrachlorobenzene	000634-66-2	Starch	928.966	2.968	26.9153	1.43	1.5	3.14409	1.60609	1393.45	40.373	3.14409	1.60609	25	298	(Hung, Lin, Chiou, 2010)	Water (Log)	cm^3/g	C1=CC(=C(C(=C1Cl)Cl)Cl)Cl	215.89	6.108	4.57	-1.538	-1.508	1.8	8.68	0.93852	0.255273	64.2449	20	-84.2449	-1.538	0	0	5.44	1.02	1.21
325	hexamethylbenzene	000087-85-4	Starch	862.979	2.936	40.738	1.61	1.5	3.11209	1.78609	1294.47	61.107	3.11209	1.78609	25	298	(Hung, Lin, Chiou, 2010)	Water (Log)	cm^3/g	CC1=C(C(=C(C(=C1C)C)C)C)C	162.28	6.606	5.28	-1.326	-1.496	0.0619	2.88	0.459392	-1.20831	68.4592	20	-88.4592	-1.326	0	0.12	5.79	0.35	1.56
869	Pentachlorobenzene	000608-93-5	Starch	2642.41	3.422	85.1138	1.93	1.5	3.59809	2.10609	3963.61	127.671	3.59809	2.10609	25	298	(Hung, Lin, Chiou, 2010)	Water (Log)	cm^3/g	C1=C(C(=C(C(=C1Cl)Cl)Cl)Cl)Cl	250.34	6.712	5.22	-1.492	-1.542	0.227	0.54	-0.267606	-0.643974	74.8538	20	-94.8538	-1.492	0	0	6	1.13	1.33
693	Dimethylphthalate	000131-11-3	Starch	52966.3	4.724	0.489779	-0.31	1.5	4.90009	-0.133909	79449.5	0.734668	4.90009	-0.133909	25	298	(Hung, Lin, Chiou, 2010)	Water (Log)	cm^3/g	COC(=O)C1=CC=CC=C1C(=O)OC	194.19	6.694	1.66	-5.034	-5.094	0.616	0.411	-0.386158	-0.210419	75.8966	20	-95.8966	-5.034	0	0.78	6.12	1.38	1.43
361	Biphenyl	000092-52-4	Starch	1621.81	3.21	11.4815	1.06	1.5	3.38609	1.23609	2432.72	17.2223	3.38609	1.23609	25	298	(Hung, Lin, Chiou, 2010)	Water (Log)	cm^3/g	C1=CC=C(C=C1)C2=CC=CC=C2	154.21	5.91	3.76	-2.15	-1.9	0.999	3.24	0.510545	-0.000434512	68.0093	20	-88.0093	-2.15	0	0.21	6.3	1.16	1.32
984	4-chlorobiphenyl (PCB 3)	002051-62-9	Starch	1905.46	3.28	27.5423	1.44	1.5	3.45609	1.61609	2858.19	41.3134	3.45609	1.61609	25	298	(Hung, Lin, Chiou, 2010)	Water (Log)	cm^3/g	C1=CC=C(C=C1)C2=CC=C(C=C2)Cl	188.66	6.24	4.4	-1.84	-1.63	0.117	4.77	0.678518	-0.931814	66.5318	20	-86.5318	-1.84	0	0.21	6.93	1.24	1.45
108	lindane	000058-89-9	Starch	39536.7	4.597	10.9648	1.04	1.5	4.77309	1.21609	59305	16.4472	4.77309	1.21609	25	298	(Hung, Lin, Chiou, 2010)	Water (Log)	cm^3/g	C1(C(C(C(C(C1Cl)Cl)Cl)Cl)Cl)Cl	290.83	7.817	4.26	-3.557	-3.677	0.0674	0.0344	-1.46344	-1.17134	85.3722	20	-105.372	-3.557	0	0.4	7	1.1	1.58
102	Hexachlorobenzene	000058-89-9	Starch	558470	5.747	154.882	2.19	1.5	5.92309	2.36609	837705	232.322	5.92309	2.36609	25	298	(Hung, Lin, Chiou, 2010)	Water (Log)	cm^3/g	C1(C(C(C(C(C1Cl)Cl)Cl)Cl)Cl)Cl	290.83	7.817	4.26	-3.557	-3.677	0.0674	0.0344	-1.46344	-1.17134	85.3722	20	-105.372	-3.557	0	0.4	7	1.1	1.58
273	diethyl phtalate	000084-66-2	Starch	20063.2	4.3024	0.849963	-0.0706	1.5	4.47849	0.105491	30094.8	1.27494	4.47849	0.105491	25	298	(Hung, Lin, Chiou, 2010)	Water (Log)	cm^3/g	CCOC(=O)C1=CC=CC=C1C(=O)OCC	222.24	7.023	2.65	-4.373	-4.603	0.339	0.28	-0.552842	-0.4698	77.3627	20	-97.3627	-4.373	0	0.78	7.11	1.39	1.71
1088	2,4??-dichlorobiphenyl (PCB 7)	033284-50-3	Starch	13520.7	4.131	120.226	2.08	1.5	4.30709	2.25609	20281.1	180.34	4.30709	2.25609	25	298	(Hung, Lin, Chiou, 2010)	Water (Log)	cm^3/g	C1=CC=C(C=C1)C2=C(C=C(C=C2)Cl)Cl	223.1	7.101	5.05	-2.051	-1.941	0.0254	0.665	-0.177178	-1.59517	74.0584	20	-94.0584	-2.051	0	0.15	7.47	1.31	1.57
980	4,4??- dichlorobiphenyl (PCB 15)	002050-68-2	Starch	21379.6	4.33	114.815	2.06	1.5	4.50609	2.23609	32069.4	172.223	4.50609	2.23609	25	298	(Hung, Lin, Chiou, 2010)	Water (Log)	cm^3/g	C1=CC(=CC=C1C2=CC=C(C=C2)Cl)Cl	223.1	7.32	5.05	-2.27	-2.09	0.00572	1.21	0.0827854	-2.2426	71.7718	20	-91.7718	-2.27	0	0.21	7.56	1.32	1.57
1027	2,4,4??- trichlorobiphenyl (PCB 28)	007012-37-5	Starch	17660.4	4.247	169.824	2.23	1.5	4.42309	2.40609	26490.6	254.737	4.42309	2.40609	25	298	(Hung, Lin, Chiou, 2010)	Water (Log)	cm^3/g	C1=CC(=CC=C1C2=C(C=C(C=C2)Cl)Cl)Cl	257.55	7.707	5.69	-2.017	-2.087	0.00533	0.3	-0.522879	-2.27327	77.0992	20	-97.0992	-2.017	0	0.15	8.1	1.39	1.69
1135	2,2??,5,5??-tetrachlorobiphenyl (PCB 52)	035693-99-3	Starch	17660.4	4.247	257.04	2.41	1.5	4.42309	2.58609	26490.6	385.559	4.42309	2.58609	25	298	(Hung, Lin, Chiou, 2010)	Water (Log)	cm^3/g	C1=CC(=C(C=C1Cl)C2=C(C=CC(=C2)Cl)Cl)Cl	291.99	8.177	6.34	-1.837	-2.087	0.00113	0.0105	-1.97881	-2.94692	89.9054	20	-109.905	-1.837	0	0.18	8.64	1.55	1.81
232	heptachlor	000076-44-8	Starch	7762.47	3.89	229.087	2.36	1.5	4.06609	2.53609	11643.7	343.63	4.06609	2.53609	25	298	(Hung, Lin, Chiou, 2010)	Water (Log)	cm^3/g	C1=CC(C2C1C3(C(=C(C2(C3(Cl)Cl)Cl)Cl)Cl)Cl)Cl	373.32	7.39	5.86	-1.53	-1.92	0.0317	0.265	-0.576754	-1.49894	77.5731	20	-97.5731	-1.53	0	0.42	8.96	1.27	1.96
978	Dibutyl phtalate	001962-75-0	Starch	1.78649e+06	6.252	10.7152	1.03	1.5	6.42809	1.20609	2.67973e+06	16.0728	6.42809	1.20609	25	298	(Hung, Lin, Chiou, 2010)	Water (Log)	cm^3/g	CCCCOC(=O)C1=CC=C(C=C1)C(=O)OCCCC	278.35	9.832	4.61	-5.222	-4.302	0.034	0.034	-1.46852	-1.46852	85.4169	20	-105.417	-5.222	0	0.8	9.09	1.4	2.27
1146	2,2??,4,5,5??-pcb (PCB 101)	037680-73-2	Starch	183654	5.264	1023.29	3.01	1.5	5.44009	3.18609	275481	1534.94	5.44009	3.18609	25	298	(Hung, Lin, Chiou, 2010)	Water (Log)	cm^3/g	C1=CC(=C(C=C1Cl)C2=CC(=C(C=C2Cl)Cl)Cl)Cl	326.44	9.234	6.98	-2.254	-2.434	0.000295	0.0408	-1.38934	-3.53018	84.7205	20	-104.72	-2.254	0	0.11	9.3	1.61	1.94
200	p,p??-DDE	000072-55-9	Starch	792501	5.899	416.869	2.62	1.5	6.07509	2.79609	1.18875e+06	625.304	6.07509	2.79609	25	298	(Hung, Lin, Chiou, 2010)	Water (Log)	cm^3/g	C1=CC(=CC=C1C(=C(Cl)Cl)C2=CC=C(C=C2)Cl)Cl	318.03	9.279	6	-3.279	-2.769	0.00913	0.00344	-2.46344	-2.03953	94.1681	20	-114.168	-3.279	0	0.3	9.38	1.53	2.05
80	chlordane	000057-74-9	Starch	129420	5.112	281.838	2.45	1.5	5.28809	2.62609	194129	422.757	5.28809	2.62609	25	298	(Hung, Lin, Chiou, 2010)	Water (Log)	cm^3/g	C1C2C(C(C1Cl)Cl)C3(C(=C(C2(C3(Cl)Cl)Cl)Cl)Cl)Cl	409.78	8.922	6.26	-2.662	-2.702	0.00267	0.00841	-2.0752	-2.57349	90.7532	20	-110.753	-2.662	0	0.45	9.76	1.31	2.13
9	p,p??-DDT	000050-29-3	Starch	3.22107e+06	6.508	831.764	2.92	1.5	6.68409	3.09609	4.8316e+06	1247.65	6.68409	3.09609	25	298	(Hung, Lin, Chiou, 2010)	Water (Log)	cm^3/g	C1=CC(=CC=C1C(C2=CC=C(C=C2)Cl)C(Cl)(Cl)Cl)Cl	354.49	10.378	6.79	-3.588	-3.468	0.000996	0.000143	-3.84466	-3.00174	106.317	20	-126.317	-3.588	0	0.22	9.88	1.51	2.22
120	dieldrin	000060-57-1	Starch	147231	5.168	107.152	2.03	1.5	5.34409	2.20609	220847	160.728	5.34409	2.20609	25	298	(Hung, Lin, Chiou, 2010)	Water (Log)	cm^3/g	C1C2C3C(C1C4C2O4)C5(C(=C(C3(C5(Cl)Cl)Cl)Cl)Cl)Cl	380.91	8.588	5.45	-3.138	-3.388	0.000365	0.0389	-1.41005	-3.43771	84.9026	20	-104.903	-3.138	0	0.61	9.92	1.31	2.01
289	Phenanthrene	000085-01-8	cellulose	126474	5.102	169.824	2.23	xxxxxxxxx	xxxxxxxxx	xxxxxxxxx	xxxxxxxxx	xxxxxxxxx	5.102	2.23	25	298	(Jonker, 2008)	Water (Log)	dimensionless	C1=CC=C2C(=C1)C=CC3=CC=CC=C32	178.24	7.222	4.35	-2.872	-2.762	0.00576	0.0875	-1.05799	-2.23958	81.806	20	-101.806	-2.872	0	0.23	7.71	1.34	1.45
600	Anthracene	000120-12-7	cellulose	121060	5.083	218.776	2.34	xxxxxxxxx	xxxxxxxxx	xxxxxxxxx	xxxxxxxxx	xxxxxxxxx	5.083	2.34	25	298	(Jonker, 2008)	Water (Log)	dimensionless	C1=CC=C2C=C3C=CC=CC3=CC2=C1	178.24	7.093	4.35	-2.743	-2.643	0.000289	0.0659	-1.18111	-3.5391	82.8889	20	-102.889	-2.743	0	0.23	7.71	1.34	1.45
750	Fluoranthene	000206-44-0	cellulose	979490	5.991	208.93	2.32	xxxxxxxxx	xxxxxxxxx	xxxxxxxxx	xxxxxxxxx	xxxxxxxxx	5.991	2.32	25	298	(Jonker, 2008)	Water (Log)	dimensionless	C1=CC=C2C(=C1)C3=CC=CC4=C3C2=CC=C4	202.26	8.601	4.93	-3.671	-3.441	0.000417	0.00811	-2.09098	-3.37986	90.892	20	-110.892	-3.671	0	0.25	9.11	1.52	1.58
672	Pyrene	000129-00-0	cellulose	449780	5.653	245.471	2.39	xxxxxxxxx	xxxxxxxxx	xxxxxxxxx	xxxxxxxxx	xxxxxxxxx	5.653	2.39	25	298	(Jonker, 2008)	Water (Log)	dimensionless	C1=CC2=C3C(=C1)C=CC4=CC=CC(=C43)C=C2	202.26	8.193	4.93	-3.263	-3.313	4.59e-05	0.0106	-1.97469	-4.33819	89.8692	20	-109.869	-3.263	0	0.25	9.11	1.52	1.58
56	Benz[a]anthracene	000056-55-3	cellulose	4.56037e+06	6.659	1288.25	3.11	xxxxxxxxx	xxxxxxxxx	xxxxxxxxx	xxxxxxxxx	xxxxxxxxx	6.659	3.11	25	298	(Jonker, 2008)	Water (Log)	dimensionless	C1=CC=C2C(=C1)C=CC3=CC4=CC=CC=C4C=C32	228.3	9.069	5.52	-3.549	-3.309	3.62e-05	0.000107	-3.97062	-4.44129	107.425	20	-127.425	-3.549	0	0.29	10.08	1.66	1.82
778	Chrysene	000218-01-9	cellulose	1.28825e+07	7.11	1412.54	3.15	xxxxxxxxx	xxxxxxxxx	xxxxxxxxx	xxxxxxxxx	xxxxxxxxx	7.11	3.15	25	298	(Jonker, 2008)	Water (Log)	dimensionless	C1=CC=C2C(=C1)C=CC3=C2C=CC4=CC=CC=C43	228.3	9.48	5.52	-3.96	-3.67	2.08e-07	0.000168	-3.77469	-6.68194	105.702	20	-125.702	-3.96	0	0.29	10.08	1.66	1.82
728	Benzo[e]pyrene	000192-97-2	cellulose	9.57194e+08	8.981	5495.41	3.74	xxxxxxxxx	xxxxxxxxx	xxxxxxxxx	xxxxxxxxx	xxxxxxxxx	8.981	3.74	25	298	(Jonker, 2008)	Water (Log)	dimensionless	C1=CC=C2C(=C1)C3=CC=CC4=C3C5=C(C=CC=C25)C=C4	252.32	11.351	6.11	-5.241	-4.911	2.58e-06	2.45e-05	-4.61083	-5.58838	113.056	20	-133.056	-5.241	0	0.31	11.48	1.84	1.95
740	Benzo[b]fluoranthene	000205-99-2	cellulose	1.00231e+08	8.001	5754.4	3.76	xxxxxxxxx	xxxxxxxxx	xxxxxxxxx	xxxxxxxxx	xxxxxxxxx	8.001	3.76	25	298	(Jonker, 2008)	Water (Log)	dimensionless	C1=CC=C2C3=C4C(=CC=C3)C5=CC=CC=C5C4=CC2=C1	252.32	10.351	6.11	-4.241	-4.571	3.32e-06	0.00173	-2.76195	-5.47886	96.7938	20	-116.794	-4.241	0	0.31	11.48	1.84	1.95
769	Benzo[k]fluoranthene	000207-08-9	cellulose	2.96483e+08	8.472	7079.46	3.85	xxxxxxxxx	xxxxxxxxx	xxxxxxxxx	xxxxxxxxx	xxxxxxxxx	8.472	3.85	25	298	(Jonker, 2008)	Water (Log)	dimensionless	C1=CC=C2C=C3C4=CC=CC5=C4C(=CC=C5)C3=CC2=C1	252.32	10.732	6.11	-4.622	-4.622	1.05e-07	1.02e-05	-4.9914	-6.97881	116.404	20	-136.404	-4.622	0	0.31	11.48	1.84	1.95
26	Benzo[a]pyrene	000050-32-8	cellulose	4.77529e+08	8.679	8511.38	3.93	xxxxxxxxx	xxxxxxxxx	xxxxxxxxx	xxxxxxxxx	xxxxxxxxx	8.679	3.93	25	298	(Jonker, 2008)	Water (Log)	dimensionless	C1=CC=C2C3=C4C(=CC2=C1)C=CC5=C4C(=CC=C5)C=C3	252.32	10.859	6.11	-4.749	-4.729	1.31e-07	2.31e-05	-4.63639	-6.88273	113.281	20	-133.281	-4.749	0	0.31	11.48	1.84	1.95
40	Dibenz[ah]anthracene	000053-70-3	cellulose	3.155e+09	9.499	26302.7	4.42	xxxxxxxxx	xxxxxxxxx	xxxxxxxxx	xxxxxxxxx	xxxxxxxxx	9.499	4.42	25	298	(Jonker, 2008)	Water (Log)	dimensionless	C1=CC=C2C(=C1)C=CC3=CC4=C(C=CC5=CC=CC=C54)C=C32	278.36	11.779	6.7	-5.079	-5.239	1.85e-09	3.33e-05	-4.47756	-8.73283	111.884	20	-131.884	-5.079	0	0.35	12.45	1.99	2.19
721	Benzo[ghi]perylene	000191-24-2	cellulose	4.90908e+09	9.691	26302.7	4.42	xxxxxxxxx	xxxxxxxxx	xxxxxxxxx	xxxxxxxxx	xxxxxxxxx	9.691	4.42	25	298	(Jonker, 2008)	Water (Log)	dimensionless	c1cc2ccc3ccc4ccc5cccc6c5c4c3c2c6c1	276.34	11.971	6.7	-5.271	-5.271	1.17e-07	8.11e-06	-5.09098	-6.93181	117.28	20	-137.28	-5.271	0	0.33	12.89	2.02	2.08
733	Indeno[123,cd]pyrene	000193-39-5	cellulose	2.07491e+09	9.317	29512.1	4.47	xxxxxxxxx	xxxxxxxxx	xxxxxxxxx	xxxxxxxxx	xxxxxxxxx	9.317	4.47	25	298	(Jonker, 2008)	Water (Log)	dimensionless	c1ccc-2c(c1)-c3ccc4ccc5cccc6c5c4c3c2c6	276.34	11.547	6.7	-4.847	-4.847	1.67e-08	4.44e-07	-6.35262	-7.77728	128.377	20	-148.377	-4.847	0	0.33	12.89	2.02	2.08
306	Phenanthrene	000085-01-8	PDMS glass fiber	9.47398e+06	6.97653	6309.57	3.8	xxxxxxxxx	xxxxxxxxx	xxxxxxxxx	xxxxxxxxx	xxxxxxxxx	6.73183	3.85983	20	293	(Jonker, 2008)	Water (Log)	dimensionless	C1=CC=C2C(=C1)C=CC3=CC=CC=C32	178.24	7.222	4.35	-2.872	-2.762	0.00576	0.0875	-1.05799	-2.23958	81.806	20	-101.806	-3.17653	0	0.23	7.71	1.34	1.45
612	Anthracene	000120-12-7	PDMS glass fiber	7.59927e+06	6.88077	6760.83	3.83	xxxxxxxxx	xxxxxxxxx	xxxxxxxxx	xxxxxxxxx	xxxxxxxxx	6.63283	3.88983	20	293	(Jonker, 2008)	Water (Log)	dimensionless	C1=CC=C2C=C3C=CC=CC3=CC2=C1	178.24	7.093	4.35	-2.743	-2.643	0.000289	0.0659	-1.18111	-3.5391	82.8889	20	-102.889	-3.05077	0	0.23	7.71	1.34	1.45
767	Fluoranthene	000206-44-0	PDMS glass fiber	1.59482e+08	8.20271	15848.9	4.2	xxxxxxxxx	xxxxxxxxx	xxxxxxxxx	xxxxxxxxx	xxxxxxxxx	7.93083	4.25983	20	293	(Jonker, 2008)	Water (Log)	dimensionless	C1=CC=C2C(=C1)C3=CC=CC4=C3C2=CC=C4	202.26	8.601	4.93	-3.671	-3.441	0.000417	0.00811	-2.09098	-3.37986	90.892	20	-110.892	-4.00271	0	0.25	9.11	1.52	1.58
689	Pyrene	000129-00-0	PDMS glass fiber	7.27197e+07	7.86165	18620.9	4.27	xxxxxxxxx	xxxxxxxxx	xxxxxxxxx	xxxxxxxxx	xxxxxxxxx	7.59283	4.32983	20	293	(Jonker, 2008)	Water (Log)	dimensionless	C1=CC2=C3C(=C1)C=CC4=CC=CC(=C43)C=C2	202.26	8.193	4.93	-3.263	-3.313	4.59e-05	0.0106	-1.97469	-4.33819	89.8692	20	-109.869	-3.59165	0	0.25	9.11	1.52	1.58
787	Chrysene	000218-01-9	PDMS glass fiber	1.06172e+09	9.02601	48977.9	4.69	xxxxxxxxx	xxxxxxxxx	xxxxxxxxx	xxxxxxxxx	xxxxxxxxx	8.70983	4.74983	20	293	(Jonker, 2008)	Water (Log)	dimensionless	C1=CC=C2C(=C1)C=CC3=C2C=CC4=CC=CC=C43	228.3	9.48	5.52	-3.96	-3.67	2.08e-07	0.000168	-3.77469	-6.68194	105.702	20	-125.702	-4.33601	0	0.29	10.08	1.66	1.82
67	Benz[a]anthracene	000056-55-3	PDMS glass fiber	5.0138e+08	8.70017	58884.4	4.77	xxxxxxxxx	xxxxxxxxx	xxxxxxxxx	xxxxxxxxx	xxxxxxxxx	8.37883	4.82983	20	293	(Jonker, 2008)	Water (Log)	dimensionless	C1=CC=C2C(=C1)C=CC3=CC4=CC=CC=C4C=C32	228.3	9.069	5.52	-3.549	-3.309	3.62e-05	0.000107	-3.97062	-4.44129	107.425	20	-127.425	-3.93017	0	0.29	10.08	1.66	1.82
730	Benzo[e]pyrene	000192-97-2	PDMS glass fiber	5.61063e+10	10.749	128825	5.11	xxxxxxxxx	xxxxxxxxx	xxxxxxxxx	xxxxxxxxx	xxxxxxxxx	10.4108	5.16983	20	293	(Jonker, 2008)	Water (Log)	dimensionless	C1=CC=C2C(=C1)C3=CC=CC4=C3C5=C(C=CC=C25)C=C4	252.32	11.351	6.11	-5.241	-4.911	2.58e-06	2.45e-05	-4.61083	-5.58838	113.056	20	-133.056	-5.63901	0	0.31	11.48	1.84	1.95
746	Benzo[b]fluoranthene	000205-99-2	PDMS glass fiber	6.31489e+09	9.80037	162181	5.21	xxxxxxxxx	xxxxxxxxx	xxxxxxxxx	xxxxxxxxx	xxxxxxxxx	9.51083	5.26983	20	293	(Jonker, 2008)	Water (Log)	dimensionless	C1=CC=C2C3=C4C(=CC=C3)C5=CC=CC=C5C4=CC2=C1	252.32	10.351	6.11	-4.241	-4.571	3.32e-06	0.00173	-2.76195	-5.47886	96.7938	20	-116.794	-4.59037	0	0.31	11.48	1.84	1.95
33	Benzo[a]pyrene	000050-32-8	PDMS glass fiber	2.44165e+10	10.3877	173780	5.24	xxxxxxxxx	xxxxxxxxx	xxxxxxxxx	xxxxxxxxx	xxxxxxxxx	10.0488	5.29983	20	293	(Jonker, 2008)	Water (Log)	dimensionless	C1=CC=C2C3=C4C(=CC2=C1)C=CC5=C4C(=CC=C5)C=C3	252.32	10.859	6.11	-4.749	-4.729	1.31e-07	2.31e-05	-4.63639	-6.88273	113.281	20	-133.281	-5.14768	0	0.31	11.48	1.84	1.95
774	Benzo[k]fluoranthene	000207-08-9	PDMS glass fiber	1.90557e+10	10.28	177828	5.25	xxxxxxxxx	xxxxxxxxx	xxxxxxxxx	xxxxxxxxx	xxxxxxxxx	9.93183	5.30983	20	293	(Jonker, 2008)	Water (Log)	dimensionless	C1=CC=C2C=C3C4=CC=CC5=C4C(=CC=C5)C3=CC2=C1	252.32	10.732	6.11	-4.622	-4.622	1.05e-07	1.02e-05	-4.9914	-6.97881	116.404	20	-136.404	-5.03002	0	0.31	11.48	1.84	1.95
45	Dibenz[ah]anthracene	000053-70-3	PDMS glass fiber	9.85156e+10	10.9935	331131	5.52	xxxxxxxxx	xxxxxxxxx	xxxxxxxxx	xxxxxxxxx	xxxxxxxxx	10.6588	5.57983	20	293	(Jonker, 2008)	Water (Log)	dimensionless	C1=CC=C2C(=C1)C=CC3=CC4=C(C=CC5=CC=CC=C54)C=C32	278.36	11.779	6.7	-5.079	-5.239	1.85e-09	3.33e-05	-4.47756	-8.73283	111.884	20	-131.884	-5.47351	0	0.35	12.45	1.99	2.19
726	Benzo[ghi]perylene	000191-24-2	PDMS glass fiber	1.95724e+11	11.2916	407380	5.61	xxxxxxxxx	xxxxxxxxx	xxxxxxxxx	xxxxxxxxx	xxxxxxxxx	10.9408	5.66983	20	293	(Jonker, 2008)	Water (Log)	dimensionless	c1cc2ccc3ccc4ccc5cccc6c5c4c3c2c6c1	276.34	11.971	6.7	-5.271	-5.271	1.17e-07	8.11e-06	-5.09098	-6.93181	117.28	20	-137.28	-5.68164	0	0.33	12.89	2.02	2.08
735	Indeno[123,cd]pyrene	000193-39-5	PDMS glass fiber	8.52786e+10	10.9308	436516	5.64	xxxxxxxxx	xxxxxxxxx	xxxxxxxxx	xxxxxxxxx	xxxxxxxxx	10.5468	5.69983	20	293	(Jonker, 2008)	Water (Log)	dimensionless	c1ccc-2c(c1)-c3ccc4ccc5cccc6c5c4c3c2c6	276.34	11.547	6.7	-4.847	-4.847	1.67e-08	4.44e-07	-6.35262	-7.77728	128.377	20	-148.377	-5.29084	0	0.33	12.89	2.02	2.08
140	Methanol	000067-56-1	PUFF	338.844	2.53	0.179802	-0.745206	0.03	1.00712	-2.26808	10.1653	0.00539406	1.20809	-2.38191	35	308	(Kamprad and Goss, 2007)	Air (Log)	cm^3/g	CO	32.04	2.96	-0.63	-3.59	-3.73	15800	16900	4.22789	4.19866	35.312	20	-55.312	-3.27521	0.31	0.3	1.1	0.44	0.31
141	Methanol	000067-56-1	PUFF	1096.48	3.04	0.129821	-0.886655	0.03	1.51712	-2.40953	32.8943	0.00389463	1.3022	-2.2878	15	288	(Kamprad and Goss, 2007)	Air (Log)	cm^3/g	CO	32.04	2.96	-0.63	-3.59	-3.73	15800	16900	4.22789	4.19866	35.312	20	-55.312	-3.92666	0.31	0.3	1.1	0.44	0.31
221	Acetonitrile	000075-05-8	PUFF	1096.48	3.04	1.08142	0.0339931	0.03	1.51712	-1.48889	32.8943	0.0324425	1.29384	-1.36716	15	288	(Kamprad and Goss, 2007)	Air (Log)	cm^3/g	CC#N	41.05	2.511	-0.15	-2.661	-2.851	26700	11800	4.07188	4.42651	36.6842	20	-56.6842	-3.00601	0	0.2	1.47	0.72	0.4
219	Acetonitrile	000075-05-8	PUFF	117.49	2.07	3.84487	0.584882	0.03	0.547121	-0.937997	3.52469	0.115346	1.30811	-1.35289	65	338	(Kamprad and Goss, 2007)	Air (Log)	cm^3/g	CC#N	41.05	2.511	-0.15	-2.661	-2.851	26700	11800	4.07188	4.42651	36.6842	20	-56.6842	-1.48512	0	0.2	1.47	0.72	0.4
218	Acetonitrile	000075-05-8	PUFF	53.7032	1.73	9.09993	0.959038	0.03	0.207121	-0.563841	1.6111	0.272998	1.43029	-1.23071	95	368	(Kamprad and Goss, 2007)	Air (Log)	cm^3/g	CC#N	41.05	2.511	-0.15	-2.661	-2.851	26700	11800	4.07188	4.42651	36.6842	20	-56.6842	-0.770962	0	0.2	1.47	0.72	0.4
220	Acetonitrile	000075-05-8	PUFF	562.341	2.75	2.57991	0.411604	0.03	1.22712	-1.11127	16.8702	0.0773972	1.4359	-1.2251	35	308	(Kamprad and Goss, 2007)	Air (Log)	cm^3/g	CC#N	41.05	2.511	-0.15	-2.661	-2.851	26700	11800	4.07188	4.42651	36.6842	20	-56.6842	-2.3384	0	0.2	1.47	0.72	0.4
226	Nitromethane	000075-52-5	PUFF	870.964	2.94	4.57399	0.660295	0.03	1.41712	-0.862583	26.1289	0.13722	1.64559	-0.976408	35	308	(Kamprad and Goss, 2007)	Air (Log)	cm^3/g	C[N+](=O)[O-]	61.04	2.582	-0.04	-2.622	-2.932	4760	4770	3.67852	3.67761	40.1442	20	-60.1442	-2.2797	0	0.24	1.53	0.71	0.42
225	Nitromethane	000075-52-5	PUFF	218.776	2.34	9.23968	0.965657	0.03	0.817121	-0.557222	6.56328	0.27719	1.64989	-0.97211	65	338	(Kamprad and Goss, 2007)	Air (Log)	cm^3/g	C[N+](=O)[O-]	61.04	2.582	-0.04	-2.622	-2.932	4760	4770	3.67852	3.67761	40.1442	20	-60.1442	-1.37434	0	0.24	1.53	0.71	0.42
227	Nitromethane	000075-52-5	PUFF	3162.28	3.5	3.25038	0.511934	0.03	1.97712	-1.01094	94.8683	0.0975114	1.73278	-0.889215	15	288	(Kamprad and Goss, 2007)	Air (Log)	cm^3/g	C[N+](=O)[O-]	61.04	2.582	-0.04	-2.622	-2.932	4760	4770	3.67852	3.67761	40.1442	20	-60.1442	-2.98807	0	0.24	1.53	0.71	0.42
224	Nitromethane	000075-52-5	PUFF	91.2011	1.96	22.0498	1.3434	0.03	0.437121	-0.179474	2.73603	0.661494	1.77566	-0.846339	95	368	(Kamprad and Goss, 2007)	Air (Log)	cm^3/g	C[N+](=O)[O-]	61.04	2.582	-0.04	-2.622	-2.932	4760	4770	3.67852	3.67761	40.1442	20	-60.1442	-0.616595	0	0.24	1.53	0.71	0.42
222	Dichloromethane	000075-09-2	PUFF	245.471	2.39	77.801	1.89099	0.03	0.867121	0.368107	7.36413	2.33403	1.04128	0.254282	35	308	(Kamprad and Goss, 2007)	Air (Log)	cm^3/g	C(Cl)Cl	84.93	2.127	1.34	-0.787	-0.877	57500	58000	4.76343	4.75967	30.6015	20	-50.6015	-0.499015	0.09	0	1.58	0.38	0.49
223	Dichloromethane	000075-09-2	PUFF	707.946	2.85	56.8873	1.75502	0.03	1.32712	0.232137	21.2384	1.70662	1.14087	0.353866	15	288	(Kamprad and Goss, 2007)	Air (Log)	cm^3/g	C(Cl)Cl	84.93	2.127	1.34	-0.787	-0.877	57500	58000	4.76343	4.75967	30.6015	20	-50.6015	-1.09498	0.09	0	1.58	0.38	0.49
133	Ethanol	000064-17-5	PUFF	117.49	2.07	0.573557	-0.241423	0.03	0.547121	-1.7643	3.52469	0.0172067	1.33981	-2.17919	65	338	(Kamprad and Goss, 2007)	Air (Log)	cm^3/g	CCO	46.07	3.379	-0.14	-3.519	-3.689	8120	7910	3.89818	3.90956	38.2121	20	-58.2121	-2.31142	0.31	0.31	1.59	0.45	0.45
135	Ethanol	000064-17-5	PUFF	1348.96	3.13	0.18059	-0.743306	0.03	1.60712	-2.26619	40.4689	0.0054177	1.37454	-2.14446	15	288	(Kamprad and Goss, 2007)	Air (Log)	cm^3/g	CCO	46.07	3.379	-0.14	-3.519	-3.689	8120	7910	3.89818	3.90956	38.2121	20	-58.2121	-3.87331	0.31	0.31	1.59	0.45	0.45
134	Ethanol	000064-17-5	PUFF	478.63	2.68	0.31067	-0.507701	0.03	1.15712	-2.03058	14.3589	0.0093201	1.3746	-2.1444	35	308	(Kamprad and Goss, 2007)	Air (Log)	cm^3/g	CCO	46.07	3.379	-0.14	-3.519	-3.689	8120	7910	3.89818	3.90956	38.2121	20	-58.2121	-3.1877	0.31	0.31	1.59	0.45	0.45
256	Methyl acetate	000079-20-9	PUFF	416.869	2.62	1.43793	0.157739	0.03	1.09712	-1.36514	12.5061	0.043138	0.894589	-1.24341	15	288	(Kamprad and Goss, 2007)	Air (Log)	cm^3/g	CC(=O)OC	74.08	2.508	0.37	-2.138	-2.328	7030	28800	4.45939	3.84696	33.2757	20	-53.2757	-2.46226	0	0.36	1.86	0.57	0.61
255	Methyl acetate	000079-20-9	PUFF	229.087	2.36	3.35124	0.525205	0.03	0.837121	-0.997673	6.8726	0.100537	1.0265	-1.1115	35	308	(Kamprad and Goss, 2007)	Air (Log)	cm^3/g	CC(=O)OC	74.08	2.508	0.37	-2.138	-2.328	7030	28800	4.45939	3.84696	33.2757	20	-53.2757	-1.83479	0	0.36	1.86	0.57	0.61
143	2-Propanone	000067-64-1	PUFF	380.189	2.58	0.259045	-0.586625	0.03	1.05712	-2.1095	11.4057	0.00777135	0.856226	-1.98777	15	288	(Kamprad and Goss, 2007)	Air (Log)	cm^3/g	CC(=O)C	58.08	2.604	-0.24	-2.844	-2.844	33200	30900	4.48996	4.52114	33.0069	20	-53.0069	-3.16662	0	0.34	1.95	0.67	0.55
142	2-Propanone	000067-64-1	PUFF	331.131	2.52	0.949894	-0.0223248	0.03	0.997121	-1.5452	9.93393	0.0284968	1.18497	-1.65903	35	308	(Kamprad and Goss, 2007)	Air (Log)	cm^3/g	CC(=O)C	58.08	2.604	-0.24	-2.844	-2.844	33200	30900	4.48996	4.52114	33.0069	20	-53.0069	-2.54232	0	0.34	1.95	0.67	0.55
156	1-Propanol	000071-23-8	PUFF	3019.95	3.48	0.481446	-0.317452	0.03	1.95712	-1.84033	90.5986	0.0144434	1.7004	-1.7186	15	288	(Kamprad and Goss, 2007)	Air (Log)	cm^3/g	CCCO	60.1	3.769	0.35	-3.419	-3.519	3090	2800	3.44716	3.48996	42.1792	20	-62.1792	-3.79745	0.31	0.31	2.09	0.45	0.59
155	1-Propanol	000071-23-8	PUFF	977.237	2.99	0.841157	-0.0751228	0.03	1.46712	-1.598	29.3171	0.0252347	1.70717	-1.71183	35	308	(Kamprad and Goss, 2007)	Air (Log)	cm^3/g	CCCO	60.1	3.769	0.35	-3.419	-3.519	3090	2800	3.44716	3.48996	42.1792	20	-62.1792	-3.06512	0.31	0.31	2.09	0.45	0.59
154	1-Propanol	000071-23-8	PUFF	229.087	2.36	1.70166	0.230872	0.03	0.837121	-1.29201	6.8726	0.0510497	1.7121	-1.7069	65	338	(Kamprad and Goss, 2007)	Air (Log)	cm^3/g	CCCO	60.1	3.769	0.35	-3.419	-3.519	3090	2800	3.44716	3.48996	42.1792	20	-62.1792	-2.12913	0.31	0.31	2.09	0.45	0.59
153	1-Propanol	000071-23-8	PUFF	74.131	1.87	3.34394	0.524259	0.03	0.347121	-0.99862	2.22393	0.100318	1.75351	-1.66549	95	368	(Kamprad and Goss, 2007)	Air (Log)	cm^3/g	CCCO	60.1	3.769	0.35	-3.419	-3.519	3090	2800	3.44716	3.48996	42.1792	20	-62.1792	-1.34574	0.31	0.31	2.09	0.45	0.59
113	Diethyl ether	000060-29-7	PUFF	125.893	2.1	4.54931	0.657946	0.03	0.577121	-0.864933	3.77678	0.136479	0.395796	-0.743204	15	288	(Kamprad and Goss, 2007)	Air (Log)	cm^3/g	CCOCC	74.12	2.189	1.05	-1.139	-1.299	71900	71700	4.85552	4.85673	29.7915	20	-49.7915	-1.44205	0	0.25	2.11	0.34	0.73
112	Diethyl ether	000060-29-7	PUFF	69.1831	1.84	9.64663	0.984375	0.03	0.317121	-0.538503	2.07549	0.289399	0.486672	-0.652328	35	308	(Kamprad and Goss, 2007)	Air (Log)	cm^3/g	CCOCC	74.12	2.189	1.05	-1.139	-1.299	71900	71700	4.85552	4.85673	29.7915	20	-49.7915	-0.855625	0	0.25	2.11	0.34	0.73
145	Trichloromethane	000067-66-3	PUFF	147.911	2.17	101.946	2.00837	0.03	0.647121	0.485491	4.43733	3.05838	1.3446	0.0706031	65	338	(Kamprad and Goss, 2007)	Air (Log)	cm^3/g	C(Cl)(Cl)Cl	119.38	2.794	1.52	-1.274	-0.824	25100	26300	4.41996	4.39967	33.6226	20	-53.6226	-0.16163	0.12	0	2.12	0.48	0.62
146	Trichloromethane	000067-66-3	PUFF	524.807	2.72	56.3871	1.75118	0.03	1.19712	0.228301	15.7442	1.69161	1.38848	0.114476	35	308	(Kamprad and Goss, 2007)	Air (Log)	cm^3/g	C(Cl)(Cl)Cl	119.38	2.794	1.52	-1.274	-0.824	25100	26300	4.41996	4.39967	33.6226	20	-53.6226	-0.968821	0.12	0	2.12	0.48	0.62
147	Trichloromethane	000067-66-3	PUFF	1479.11	3.17	37.1217	1.56963	0.03	1.64712	0.0467487	44.3733	1.11365	1.44248	0.168478	15	288	(Kamprad and Goss, 2007)	Air (Log)	cm^3/g	C(Cl)(Cl)Cl	119.38	2.794	1.52	-1.274	-0.824	25100	26300	4.41996	4.39967	33.6226	20	-53.6226	-1.60037	0.12	0	2.12	0.48	0.62
144	Trichloromethane	000067-66-3	PUFF	74.131	1.87	242.077	2.38395	0.03	0.347121	0.861075	2.22393	7.26231	1.46821	0.19421	95	368	(Kamprad and Goss, 2007)	Air (Log)	cm^3/g	C(Cl)(Cl)Cl	119.38	2.794	1.52	-1.274	-0.824	25100	26300	4.41996	4.39967	33.6226	20	-53.6226	0.513954	0.12	0	2.12	0.48	0.62
477	1,2-Dichloroethane	000107-06-2	PUFF	1778.28	3.25	86.1547	1.93528	0.03	1.72712	0.4124	53.3484	2.58464	1.50113	0.53413	15	288	(Kamprad and Goss, 2007)	Air (Log)	cm^3/g	C(CCl)Cl	98.96	2.797	1.83	-0.967	-1.317	10000	10500	4.02119	4	37.1301	20	-57.1301	-1.31472	0	0.1	2.31	0.48	0.64
476	1,2-Dichloroethane	000107-06-2	PUFF	660.693	2.82	150.71	2.17814	0.03	1.29712	0.655263	19.8208	4.52129	1.50844	0.541438	35	308	(Kamprad and Goss, 2007)	Air (Log)	cm^3/g	C(CCl)Cl	98.96	2.797	1.83	-0.967	-1.317	10000	10500	4.02119	4	37.1301	20	-57.1301	-0.641858	0	0.1	2.31	0.48	0.64
474	1,2-Dichloroethane	000107-06-2	PUFF	79.4328	1.9	688.502	2.83791	0.03	0.377121	1.31503	2.38298	20.6551	1.61516	0.648161	95	368	(Kamprad and Goss, 2007)	Air (Log)	cm^3/g	C(CCl)Cl	98.96	2.797	1.83	-0.967	-1.317	10000	10500	4.02119	4	37.1301	20	-57.1301	0.937905	0	0.1	2.31	0.48	0.64
475	1,2-Dichloroethane	000107-06-2	PUFF	281.838	2.45	465.727	2.66813	0.03	0.927121	1.14525	8.45515	13.9718	1.69736	0.730364	65	338	(Kamprad and Goss, 2007)	Air (Log)	cm^3/g	C(CCl)Cl	98.96	2.797	1.83	-0.967	-1.317	10000	10500	4.02119	4	37.1301	20	-57.1301	0.218131	0	0.1	2.31	0.48	0.64
703	Ethyl acetate	000141-78-6	PUFF	707.946	2.85	2.37217	0.375146	0.03	1.32712	-1.14773	21.2384	0.0711652	1.105	-1.026	15	288	(Kamprad and Goss, 2007)	Air (Log)	cm^3/g	CCOC(=O)C	88.11	2.991	0.86	-2.131	-2.261	13100	12400	4.09342	4.11727	36.4948	20	-56.4948	-2.47485	0	0.36	2.35	0.58	0.75
702	Ethyl acetate	000141-78-6	PUFF	371.535	2.57	5.76137	0.760526	0.03	1.04712	-0.762353	11.1461	0.172841	1.25482	-0.876178	35	308	(Kamprad and Goss, 2007)	Air (Log)	cm^3/g	CCOC(=O)C	88.11	2.991	0.86	-2.131	-2.261	13100	12400	4.09342	4.11727	36.4948	20	-56.4948	-1.80947	0	0.36	2.35	0.58	0.75
701	Ethyl acetate	000141-78-6	PUFF	107.152	2.03	11.7747	1.07095	0.03	0.507121	-0.451927	3.21456	0.353242	1.26418	-0.866816	65	338	(Kamprad and Goss, 2007)	Air (Log)	cm^3/g	CCOC(=O)C	88.11	2.991	0.86	-2.131	-2.261	13100	12400	4.09342	4.11727	36.4948	20	-56.4948	-0.959049	0	0.36	2.35	0.58	0.75
174	1,1,1-Trichloroethane	000071-55-6	PUFF	549.541	2.74	275.288	2.43979	0.03	1.21712	0.916909	16.4862	8.25865	1.00164	1.03864	15	288	(Kamprad and Goss, 2007)	Air (Log)	cm^3/g	CC(Cl)(Cl)Cl	133.41	2.643	2.68	0.037	-0.153	14900	16500	4.21748	4.17319	35.4035	20	-55.4035	-0.300212	0	0.01	2.4	0.44	0.76
173	1,1,1-Trichloroethane	000071-55-6	PUFF	223.872	2.35	503.866	2.70232	0.03	0.827121	1.17944	6.71616	15.116	1.02861	1.06561	35	308	(Kamprad and Goss, 2007)	Air (Log)	cm^3/g	CC(Cl)(Cl)Cl	133.41	2.643	2.68	0.037	-0.153	14900	16500	4.21748	4.17319	35.4035	20	-55.4035	0.352315	0	0.01	2.4	0.44	0.76
172	1,1,1-Trichloroethane	000071-55-6	PUFF	81.2831	1.91	1248.29	3.09631	0.03	0.387121	1.57344	2.43849	37.4486	1.12155	1.15855	65	338	(Kamprad and Goss, 2007)	Air (Log)	cm^3/g	CC(Cl)(Cl)Cl	133.41	2.643	2.68	0.037	-0.153	14900	16500	4.21748	4.17319	35.4035	20	-55.4035	1.18631	0	0.01	2.4	0.44	0.76
247	2-Butanone	000078-93-3	PUFF	776.247	2.89	0.763092	-0.117423	0.03	1.36712	-1.6403	23.2874	0.0228928	1.14443	-1.51857	15	288	(Kamprad and Goss, 2007)	Air (Log)	cm^3/g	CCC(=O)C	72.11	2.923	0.26	-2.663	-2.633	13100	12100	4.08279	4.11727	36.5883	20	-56.5883	-3.00742	0	0.34	2.45	0.67	0.69
244	2-Butanone	000078-93-3	PUFF	45.7088	1.66	7.65315	0.88384	0.03	0.137121	-0.639039	1.37126	0.229594	1.3571	-1.3059	95	368	(Kamprad and Goss, 2007)	Air (Log)	cm^3/g	CCC(=O)C	72.11	2.923	0.26	-2.663	-2.633	13100	12100	4.08279	4.11727	36.5883	20	-56.5883	-0.77616	0	0.34	2.45	0.67	0.69
245	2-Butanone	000078-93-3	PUFF	134.896	2.13	4.37413	0.640892	0.03	0.607121	-0.881987	4.04689	0.131224	1.36612	-1.29688	65	338	(Kamprad and Goss, 2007)	Air (Log)	cm^3/g	CCC(=O)C	72.11	2.923	0.26	-2.663	-2.633	13100	12100	4.08279	4.11727	36.5883	20	-56.5883	-1.48911	0	0.34	2.45	0.67	0.69
246	2-Butanone	000078-93-3	PUFF	645.654	2.81	2.94482	0.469058	0.03	1.28712	-1.05382	19.3696	0.0883445	1.49535	-1.16765	35	308	(Kamprad and Goss, 2007)	Air (Log)	cm^3/g	CCC(=O)C	72.11	2.923	0.26	-2.663	-2.633	13100	12100	4.08279	4.11727	36.5883	20	-56.5883	-2.34094	0	0.34	2.45	0.67	0.69
539	Butyronitrile	000109-74-0	PUFF	2884.03	3.46	5.24596	0.719825	0.03	1.93712	-0.803054	86.5209	0.157379	1.67868	-0.681324	15	288	(Kamprad and Goss, 2007)	Air (Log)	cm^3/g	CCCC#N	69.11	3.2	0.84	-2.36	-2.67	2320	2600	3.41497	3.36549	42.4623	20	-62.4623	-2.74018	0	0.21	2.46	0.73	0.69
538	Butyronitrile	000109-74-0	PUFF	1230.27	3.09	12.1755	1.08549	0.03	1.56712	-0.43739	36.9081	0.365266	1.80878	-0.551215	35	308	(Kamprad and Goss, 2007)	Air (Log)	cm^3/g	CCCC#N	69.11	3.2	0.84	-2.36	-2.67	2320	2600	3.41497	3.36549	42.4623	20	-62.4623	-2.00451	0	0.21	2.46	0.73	0.69
537	Butyronitrile	000109-74-0	PUFF	331.131	2.52	28.5591	1.45574	0.03	0.997121	-0.0671341	9.93393	0.856773	1.87798	-0.482022	65	338	(Kamprad and Goss, 2007)	Air (Log)	cm^3/g	CCCC#N	69.11	3.2	0.84	-2.36	-2.67	2320	2600	3.41497	3.36549	42.4623	20	-62.4623	-1.06426	0	0.21	2.46	0.73	0.69
536	Butyronitrile	000109-74-0	PUFF	112.202	2.05	59.2514	1.7727	0.03	0.527121	0.24982	3.36606	1.77754	1.94295	-0.417046	95	368	(Kamprad and Goss, 2007)	Air (Log)	cm^3/g	CCCC#N	69.11	3.2	0.84	-2.36	-2.67	2320	2600	3.41497	3.36549	42.4623	20	-62.4623	-0.277302	0	0.21	2.46	0.73	0.69
490	1-Nitropropane	000108-03-2	PUFF	5754.4	3.76	9.89889	0.995586	0.03	2.23712	-0.527292	172.632	0.296967	1.96344	-0.405563	15	288	(Kamprad and Goss, 2007)	Air (Log)	cm^3/g	CCC[N+](=O)[O-]	89.09	3.319	0.95	-2.369	-2.449	1270	1350	3.13033	3.1038	44.966	20	-64.966	-2.76441	0	0.25	2.52	0.72	0.71
489	1-Nitropropane	000108-03-2	PUFF	2089.3	3.32	20.9285	1.32074	0.03	1.79712	-0.202141	62.6789	0.627854	2.05303	-0.315966	35	308	(Kamprad and Goss, 2007)	Air (Log)	cm^3/g	CCC[N+](=O)[O-]	89.09	3.319	0.95	-2.369	-2.449	1270	1350	3.13033	3.1038	44.966	20	-64.966	-1.99926	0	0.25	2.52	0.72	0.71
488	1-Nitropropane	000108-03-2	PUFF	512.861	2.71	48.8294	1.68868	0.03	1.18712	0.165803	15.3858	1.46488	2.11991	-0.249086	65	338	(Kamprad and Goss, 2007)	Air (Log)	cm^3/g	CCC[N+](=O)[O-]	89.09	3.319	0.95	-2.369	-2.449	1270	1350	3.13033	3.1038	44.966	20	-64.966	-1.02132	0	0.25	2.52	0.72	0.71
487	1-Nitropropane	000108-03-2	PUFF	173.78	2.24	108.938	2.03718	0.03	0.717121	0.5143	5.2134	3.26813	2.21643	-0.152566	95	368	(Kamprad and Goss, 2007)	Air (Log)	cm^3/g	CCC[N+](=O)[O-]	89.09	3.319	0.95	-2.369	-2.449	1270	1350	3.13033	3.1038	44.966	20	-64.966	-0.202822	0	0.25	2.52	0.72	0.71
254	Trichloroethene	000079-01-6	PUFF	1621.81	3.21	326.743	2.51421	0.03	1.68712	0.991327	48.6543	9.80229	1.45806	1.11306	15	288	(Kamprad and Goss, 2007)	Air (Log)	cm^3/g	C(=C(Cl)Cl)Cl	131.39	2.815	2.47	-0.345	-0.395	9660	9200	3.96379	3.98498	37.635	20	-57.635	-0.695794	0	0.11	2.56	0.64	0.71
253	Trichloroethene	000079-01-6	PUFF	588.844	2.77	566.259	2.75302	0.03	1.24712	1.23014	17.6653	16.9878	1.46131	1.11631	35	308	(Kamprad and Goss, 2007)	Air (Log)	cm^3/g	C(=C(Cl)Cl)Cl	131.39	2.815	2.47	-0.345	-0.395	9660	9200	3.96379	3.98498	37.635	20	-57.635	-0.016985	0	0.11	2.56	0.64	0.71
252	Trichloroethene	000079-01-6	PUFF	173.78	2.24	1231.98	3.09061	0.03	0.717121	1.56773	5.2134	36.9595	1.49784	1.15284	65	338	(Kamprad and Goss, 2007)	Air (Log)	cm^3/g	C(=C(Cl)Cl)Cl	131.39	2.815	2.47	-0.345	-0.395	9660	9200	3.96379	3.98498	37.635	20	-57.635	0.850605	0	0.11	2.56	0.64	0.71
251	Trichloroethene	000079-01-6	PUFF	83.1764	1.92	3138.63	3.49674	0.03	0.397121	1.97386	2.49529	94.1589	1.652	1.307	95	368	(Kamprad and Goss, 2007)	Air (Log)	cm^3/g	C(=C(Cl)Cl)Cl	131.39	2.815	2.47	-0.345	-0.395	9660	9200	3.96379	3.98498	37.635	20	-57.635	1.57674	0	0.11	2.56	0.64	0.71
53	Tetrachloromethane	000056-23-5	PUFF	549.541	2.74	115.62	2.06303	0.03	1.21712	0.540154	16.4862	3.4686	0.999883	0.661883	15	288	(Kamprad and Goss, 2007)	Air (Log)	cm^3/g	C(Cl)(Cl)(Cl)Cl	153.82	2.778	2.44	-0.338	0.052	13300	15300	4.18469	4.12385	35.692	20	-55.692	-0.676968	0	0	2.56	0.55	0.74
52	Tetrachloromethane	000056-23-5	PUFF	251.189	2.4	239.308	2.37896	0.03	0.877121	0.856078	7.53566	7.17923	1.08025	0.742253	35	308	(Kamprad and Goss, 2007)	Air (Log)	cm^3/g	C(Cl)(Cl)(Cl)Cl	153.82	2.778	2.44	-0.338	0.052	13300	15300	4.18469	4.12385	35.692	20	-55.692	-0.0210433	0	0	2.56	0.55	0.74
51	Tetrachloromethane	000056-23-5	PUFF	89.1251	1.95	585.191	2.7673	0.03	0.427121	1.24442	2.67375	17.5557	1.16753	0.829531	65	338	(Kamprad and Goss, 2007)	Air (Log)	cm^3/g	C(Cl)(Cl)(Cl)Cl	153.82	2.778	2.44	-0.338	0.052	13300	15300	4.18469	4.12385	35.692	20	-55.692	0.817298	0	0	2.56	0.55	0.74
160	1-Butanol	000071-36-3	PUFF	7585.78	3.88	0.981698	-0.00802224	0.03	2.35712	-1.5309	227.573	0.0294509	2.07383	-1.40917	15	288	(Kamprad and Goss, 2007)	Air (Log)	cm^3/g	CCCCO	74.12	4.323	0.84	-3.483	-3.443	1040	893	2.95085	3.01703	46.5447	20	-66.5447	-3.88802	0.31	0.31	2.58	0.46	0.73
158	1-Butanol	000071-36-3	PUFF	467.735	2.67	3.69344	0.567431	0.03	1.14712	-0.955448	14.0321	0.110803	2.11266	-1.37034	65	338	(Kamprad and Goss, 2007)	Air (Log)	cm^3/g	CCCCO	74.12	4.323	0.84	-3.483	-3.443	1040	893	2.95085	3.01703	46.5447	20	-66.5447	-2.10257	0.31	0.31	2.58	0.46	0.73
159	1-Butanol	000071-36-3	PUFF	2630.27	3.42	2.06882	0.315722	0.03	1.89712	-1.20716	78.908	0.0620645	2.16202	-1.32098	35	308	(Kamprad and Goss, 2007)	Air (Log)	cm^3/g	CCCCO	74.12	4.323	0.84	-3.483	-3.443	1040	893	2.95085	3.01703	46.5447	20	-66.5447	-3.10428	0.31	0.31	2.58	0.46	0.73
157	1-Butanol	000071-36-3	PUFF	141.254	2.15	7.68807	0.885818	0.03	0.627121	-0.637061	4.23761	0.230642	2.17907	-1.30393	95	368	(Kamprad and Goss, 2007)	Air (Log)	cm^3/g	CCCCO	74.12	4.323	0.84	-3.483	-3.443	1040	893	2.95085	3.01703	46.5447	20	-66.5447	-1.26418	0.31	0.31	2.58	0.46	0.73
888	Methyl tert-butyl ether	000628-28-4	PUFF	128.825	2.11	3.30711	0.519448	0.03	0.587121	-1.00343	3.86475	0.0992132	0.374299	-0.881701	15	288	(Kamprad and Goss, 2007)	Air (Log)	cm^3/g	CCCCOC	88.15	2.796	1.54	-1.256	-1.136	19000	18500	4.26717	4.27875	34.9665	20	-54.9665	-1.59055	0	0.25	2.61	0.34	0.87
887	Methy tert-butyl ether	000628-28-4	PUFF	85.1138	1.93	9.70125	0.986828	0.03	0.407121	-0.536051	2.55341	0.291038	0.606124	-0.649876	35	308	(Kamprad and Goss, 2007)	Air (Log)	cm^3/g	CCCCOC	88.15	2.796	1.54	-1.256	-1.136	19000	18500	4.26717	4.27875	34.9665	20	-54.9665	-0.943172	0	0.25	2.61	0.34	0.87
643	1,4-Dioxane	000123-91-1	PUFF	2238.72	3.35	0.169199	-0.771602	0.03	1.82712	-2.29448	67.1616	0.00507597	1.58425	-2.17275	15	288	(Kamprad and Goss, 2007)	Air (Log)	cm^3/g	C1COCCO1	88.11	3.437	-0.32	-3.757	-3.707	5410	5080	3.70586	3.7332	39.9037	20	-59.9037	-4.1216	0	0.44	2.78	0.58	0.68
642	1,4-Dioxane	000123-91-1	PUFF	954.993	2.98	0.366376	-0.436073	0.03	1.45712	-1.95895	28.6498	0.0109913	1.68422	-2.07278	35	308	(Kamprad and Goss, 2007)	Air (Log)	cm^3/g	C1COCCO1	88.11	3.437	-0.32	-3.757	-3.707	5410	5080	3.70586	3.7332	39.9037	20	-59.9037	-3.41607	0	0.44	2.78	0.58	0.68
641	1,4-Dioxane	000123-91-1	PUFF	301.995	2.48	0.92399	-0.0343327	0.03	0.957121	-1.55721	9.05986	0.0277197	1.7849	-1.9721	65	338	(Kamprad and Goss, 2007)	Air (Log)	cm^3/g	C1COCCO1	88.11	3.437	-0.32	-3.757	-3.707	5410	5080	3.70586	3.7332	39.9037	20	-59.9037	-2.51433	0	0.44	2.78	0.58	0.68
640	1,4-Dioxane	000123-91-1	PUFF	107.152	2.03	1.86374	0.270385	0.03	0.507121	-1.25249	3.21456	0.0559122	1.83764	-1.91936	95	368	(Kamprad and Goss, 2007)	Air (Log)	cm^3/g	C1COCCO1	88.11	3.437	-0.32	-3.757	-3.707	5410	5080	3.70586	3.7332	39.9037	20	-59.9037	-1.75961	0	0.44	2.78	0.58	0.68
886	3-Methylbutan-2-one	000625-28-5	PUFF	870.964	2.94	1.55334	0.191265	0.03	1.41712	-1.33161	26.1289	0.0466001	1.14412	-1.20988	15	288	(Kamprad and Goss, 2007)	Air (Log)	cm^3/g	CC(C)CC#N	83.13	3.604	1.25	-2.354	-2.534	1490	1390	3.14301	3.17319	44.8544	20	-64.8544	-2.74873	0	0.24	2.84	0.72	0.83
885	3-Methylbutan-2-one	000625-28-5	PUFF	457.088	2.66	4.73263	0.675103	0.03	1.13712	-0.847776	13.7126	0.141979	1.3924	-0.961601	35	308	(Kamprad and Goss, 2007)	Air (Log)	cm^3/g	CC(C)CC#N	83.13	3.604	1.25	-2.354	-2.534	1490	1390	3.14301	3.17319	44.8544	20	-64.8544	-1.9849	0	0.24	2.84	0.72	0.83
883	3-Methylbutan-2-one	000625-28-5	PUFF	39.8107	1.6	25.6129	1.40846	0.03	0.0771213	-0.11442	1.19432	0.768388	1.57271	-0.781285	95	368	(Kamprad and Goss, 2007)	Air (Log)	cm^3/g	CC(C)CC#N	83.13	3.604	1.25	-2.354	-2.534	1490	1390	3.14301	3.17319	44.8544	20	-64.8544	-0.191541	0	0.24	2.84	0.72	0.83
884	3-Methylbutan-2-one	000625-28-5	PUFF	158.489	2.2	15.537	1.19137	0.03	0.677121	-0.331511	4.75468	0.466111	1.6076	-0.746399	65	338	(Kamprad and Goss, 2007)	Air (Log)	cm^3/g	CC(C)CC#N	83.13	3.604	1.25	-2.354	-2.534	1490	1390	3.14301	3.17319	44.8544	20	-64.8544	-1.00863	0	0.24	2.84	0.72	0.83
535	Propyl acetate	000109-60-4	PUFF	1659.59	3.22	8.3952	0.924031	0.03	1.69712	-0.598847	49.7876	0.251856	1.45288	-0.477118	15	288	(Kamprad and Goss, 2007)	Air (Log)	cm^3/g	CCCOC(=O)C	102.13	3.29	1.36	-1.93	-2.05	4680	4790	3.68034	3.67025	40.1282	20	-60.1282	-2.29597	0	0.37	2.85	0.58	0.89
534	Propyl acetate	000109-60-4	PUFF	691.831	2.84	17.8733	1.2522	0.03	1.31712	-0.270674	20.7549	0.536199	1.5455	-0.384499	35	308	(Kamprad and Goss, 2007)	Air (Log)	cm^3/g	CCCOC(=O)C	102.13	3.29	1.36	-1.93	-2.05	4680	4790	3.68034	3.67025	40.1282	20	-60.1282	-1.5878	0	0.37	2.85	0.58	0.89
533	Propyl acetate	000109-60-4	PUFF	177.828	2.25	36.9254	1.56733	0.03	0.727121	0.0444465	5.33484	1.10776	1.55956	-0.370442	65	338	(Kamprad and Goss, 2007)	Air (Log)	cm^3/g	CCCOC(=O)C	102.13	3.29	1.36	-1.93	-2.05	4680	4790	3.68034	3.67025	40.1282	20	-60.1282	-0.682675	0	0.37	2.85	0.58	0.89
532	Propyl acetate	000109-60-4	PUFF	112.202	2.05	133.313	2.12487	0.03	0.527121	0.601993	3.36606	3.99939	1.86513	-0.0648722	95	368	(Kamprad and Goss, 2007)	Air (Log)	cm^3/g	CCCOC(=O)C	102.13	3.29	1.36	-1.93	-2.05	4680	4790	3.68034	3.67025	40.1282	20	-60.1282	0.074872	0	0.37	2.85	0.58	0.89
149	N, N-Dimethylformamide	000068-12-2	PUFF	630.957	2.8	0.445326	-0.351322	0.03	1.27712	-1.8742	18.9287	0.0133598	2.89893	-2.54107	95	368	(Kamprad and Goss, 2007)	Air (Log)	cm^3/g	CN(C)C=O	73.1	4.51	-0.93	-5.44	-5.52	465	516	2.71265	2.66745	48.6399	20	-68.6399	-3.15132	0	0.63	2.86	1.11	0.65
150	N, N-Dimethylformamide	000068-12-2	PUFF	2691.53	3.43	0.259355	-0.586106	0.03	1.90712	-2.10898	80.746	0.00778065	2.91613	-2.52387	65	338	(Kamprad and Goss, 2007)	Air (Log)	cm^3/g	CN(C)C=O	73.1	4.51	-0.93	-5.44	-5.52	465	516	2.71265	2.66745	48.6399	20	-68.6399	-4.01611	0	0.63	2.86	1.11	0.65
492	Diisopropyl ether	000108-20-3	PUFF	194.984	2.29	21.7342	1.33714	0.03	0.767121	-0.185735	5.84953	0.652027	0.555995	-0.0640052	15	288	(Kamprad and Goss, 2007)	Air (Log)	cm^3/g	CC(C)OC(C)C	102.18	2.5	1.88	-0.62	-0.98	20200	19900	4.29885	4.30535	34.6878	20	-54.6878	-0.952856	0	0.31	2.87	0.31	1.01
491	Diisopropyl ether	000108-20-3	PUFF	77.6247	1.89	38.1278	1.58124	0.03	0.367121	0.0583631	2.32874	1.14383	0.564538	-0.0554618	35	308	(Kamprad and Goss, 2007)	Air (Log)	cm^3/g	CC(C)OC(C)C	102.18	2.5	1.88	-0.62	-0.98	20200	19900	4.29885	4.30535	34.6878	20	-54.6878	-0.308758	0	0.31	2.87	0.31	1.01
829	Fluorobenzene	000462-06-6	PUFF	1202.26	3.08	114.507	2.05883	0.03	1.55712	0.535953	36.0679	3.43521	1.33068	0.657683	15	288	(Kamprad and Goss, 2007)	Air (Log)	cm^3/g	C1=CC=C(C=C1)F	96.11	2.863	2.19	-0.673	-0.593	9560	10300	4.01284	3.98046	37.2036	20	-57.2036	-1.02117	0	0.12	2.89	0.66	0.73
828	Fluorobenzene	000462-06-6	PUFF	501.187	2.7	225.195	2.35256	0.03	1.17712	0.829681	15.0356	6.75586	1.38886	0.715856	35	308	(Kamprad and Goss, 2007)	Air (Log)	cm^3/g	C1=CC=C(C=C1)F	96.11	2.863	2.19	-0.673	-0.593	9560	10300	4.01284	3.98046	37.2036	20	-57.2036	-0.34744	0	0.12	2.89	0.66	0.73
827	Fluorobenzene	000462-06-6	PUFF	154.882	2.19	505.423	2.70366	0.03	0.667121	1.18078	4.64645	15.1627	1.43889	0.765888	65	338	(Kamprad and Goss, 2007)	Air (Log)	cm^3/g	C1=CC=C(C=C1)F	96.11	2.863	2.19	-0.673	-0.593	9560	10300	4.01284	3.98046	37.2036	20	-57.2036	0.513655	0	0.12	2.89	0.66	0.73
826	Fluorobenzene	000462-06-6	PUFF	93.3254	1.97	1600.87	3.20435	0.03	0.447121	1.68148	2.79976	48.026	1.68761	1.01461	95	368	(Kamprad and Goss, 2007)	Air (Log)	cm^3/g	C1=CC=C(C=C1)F	96.11	2.863	2.19	-0.673	-0.593	9560	10300	4.01284	3.98046	37.2036	20	-57.2036	1.23435	0	0.12	2.89	0.66	0.73
485	2-Pentanone	000107-87-9	PUFF	1737.8	3.24	1.76884	0.247689	0.03	1.71712	-1.27519	52.134	0.0530653	1.47254	-1.15346	15	288	(Kamprad and Goss, 2007)	Air (Log)	cm^3/g	CCCC(=O)C	86.13	3.376	0.75	-2.626	-2.466	5260	4720	3.67394	3.72099	40.1845	20	-60.1845	-2.99231	0	0.34	2.94	0.68	0.83
484	2-Pentanone	000107-87-9	PUFF	602.56	2.78	3.13707	0.496525	0.03	1.25712	-1.02635	18.0768	0.0941122	1.48582	-1.14018	35	308	(Kamprad and Goss, 2007)	Air (Log)	cm^3/g	CCCC(=O)C	86.13	3.376	0.75	-2.626	-2.466	5260	4720	3.67394	3.72099	40.1845	20	-60.1845	-2.28348	0	0.34	2.94	0.68	0.83
483	2-Pentanone	000107-87-9	PUFF	218.776	2.34	9.17259	0.962492	0.03	0.817121	-0.560387	6.56328	0.275178	1.65072	-0.975275	65	338	(Kamprad and Goss, 2007)	Air (Log)	cm^3/g	CCCC(=O)C	86.13	3.376	0.75	-2.626	-2.466	5260	4720	3.67394	3.72099	40.1845	20	-60.1845	-1.37751	0	0.34	2.94	0.68	0.83
482	2-Pentanone	000107-87-9	PUFF	93.3254	1.97	22.4258	1.35075	0.03	0.447121	-0.172132	2.79976	0.672773	1.787	-0.838997	95	368	(Kamprad and Goss, 2007)	Air (Log)	cm^3/g	CCCC(=O)C	86.13	3.376	0.75	-2.626	-2.466	5260	4720	3.67394	3.72099	40.1845	20	-60.1845	-0.619253	0	0.34	2.94	0.68	0.83
168	Benzene	000071-43-2	PUFF	891.251	2.95	66.4536	1.82252	0.03	1.42712	0.299639	26.7375	1.99361	1.20537	0.421369	15	288	(Kamprad and Goss, 2007)	Air (Log)	cm^3/g	C1=CC=CC=C1	78.11	2.774	1.99	-0.784	-0.644	11600	12600	4.10037	4.06446	36.4337	20	-56.4337	-1.12748	0	0.12	2.96	0.69	0.72
167	Benzene	000071-43-2	PUFF	363.078	2.56	125.077	2.09718	0.03	1.03712	0.574299	10.8923	3.75231	1.24447	0.460474	35	308	(Kamprad and Goss, 2007)	Air (Log)	cm^3/g	C1=CC=CC=C1	78.11	2.774	1.99	-0.784	-0.644	11600	12600	4.10037	4.06446	36.4337	20	-56.4337	-0.462822	0	0.12	2.96	0.69	0.72
166	Benzene	000071-43-2	PUFF	147.911	2.17	360.316	2.55668	0.03	0.647121	1.0338	4.43733	10.8095	1.40292	0.618916	65	338	(Kamprad and Goss, 2007)	Air (Log)	cm^3/g	C1=CC=CC=C1	78.11	2.774	1.99	-0.784	-0.644	11600	12600	4.10037	4.06446	36.4337	20	-56.4337	0.386683	0	0.12	2.96	0.69	0.72
165	Benzene	000071-43-2	PUFF	87.0964	1.94	1090.64	3.03768	0.03	0.417121	1.5148	2.61289	32.7193	1.63194	0.847939	95	368	(Kamprad and Goss, 2007)	Air (Log)	cm^3/g	C1=CC=CC=C1	78.11	2.774	1.99	-0.784	-0.644	11600	12600	4.10037	4.06446	36.4337	20	-56.4337	1.09768	0	0.12	2.96	0.69	0.72
481	1-Iodopropane	000107-08-4	PUFF	1288.25	3.11	206.195	2.31428	0.03	1.58712	0.7914	38.6475	6.18585	1.34713	0.913129	15	288	(Kamprad and Goss, 2007)	Air (Log)	cm^3/g	CCCI	169.99	3.004	2.57	-0.434	-0.434	5170	5750	3.75967	3.71349	39.4304	20	-59.4304	-0.795722	0	0.05	3.05	0.47	0.79
480	1-Iodopropane	000107-08-4	PUFF	512.861	2.71	411.371	2.61423	0.03	1.18712	1.09135	15.3858	12.3411	1.41153	0.97753	35	308	(Kamprad and Goss, 2007)	Air (Log)	cm^3/g	CCCI	169.99	3.004	2.57	-0.434	-0.434	5170	5750	3.75967	3.71349	39.4304	20	-59.4304	-0.0957668	0	0.05	3.05	0.47	0.79
479	1-Iodopropane	000107-08-4	PUFF	169.824	2.23	1068.69	3.02885	0.03	0.707121	1.50597	5.09473	32.0606	1.52508	1.09108	65	338	(Kamprad and Goss, 2007)	Air (Log)	cm^3/g	CCCI	169.99	3.004	2.57	-0.434	-0.434	5170	5750	3.75967	3.71349	39.4304	20	-59.4304	0.79885	0	0.05	3.05	0.47	0.79
478	1-Iodopropane	000107-08-4	PUFF	83.1764	1.92	2934.98	3.46761	0.03	0.397121	1.94473	2.49529	88.0494	1.71186	1.27786	95	368	(Kamprad and Goss, 2007)	Air (Log)	cm^3/g	CCCI	169.99	3.004	2.57	-0.434	-0.434	5170	5750	3.75967	3.71349	39.4304	20	-59.4304	1.54761	0	0.05	3.05	0.47	0.79
548	Pyridine	000110-86-1	PUFF	1995.26	3.3	2.86491	0.457111	0.03	1.77712	-1.06577	59.8579	0.0859474	2.01741	-1.17959	35	308	(Kamprad and Goss, 2007)	Air (Log)	cm^3/g	C1=CC=NC=C1	79.1	3.997	0.8	-3.197	-3.347	2580	2770	3.44248	3.41162	42.2204	20	-62.2204	-2.84289	0	0.4	3.07	0.82	0.68
547	Pyridine	000110-86-1	PUFF	660.693	2.82	8.19834	0.913726	0.03	1.29712	-0.609153	19.8208	0.24595	2.17296	-1.02404	65	338	(Kamprad and Goss, 2007)	Air (Log)	cm^3/g	C1=CC=NC=C1	79.1	3.997	0.8	-3.197	-3.347	2580	2770	3.44248	3.41162	42.2204	20	-62.2204	-1.90627	0	0.4	3.07	0.82	0.68
546	Pyridine	000110-86-1	PUFF	245.471	2.39	18.5196	1.26763	0.03	0.867121	-0.255248	7.36413	0.555587	2.27489	-0.922113	95	368	(Kamprad and Goss, 2007)	Air (Log)	cm^3/g	C1=CC=NC=C1	79.1	3.997	0.8	-3.197	-3.347	2580	2770	3.44248	3.41162	42.2204	20	-62.2204	-1.12237	0	0.4	3.07	0.82	0.68
163	1-Pentanol	000071-41-0	PUFF	5754.4	3.76	5.10446	0.70795	0.03	2.23712	-0.814929	172.632	0.153134	2.52625	-0.928754	35	308	(Kamprad and Goss, 2007)	Air (Log)	cm^3/g	CCCCCO	88.15	4.785	1.33	-3.455	-3.275	353	293	2.46687	2.54777	50.8017	20	-70.8017	-3.05205	0.31	0.32	3.08	0.46	0.87
164	1-Pentanol	000071-41-0	PUFF	25704	4.41	3.34247	0.524067	0.03	2.88712	-0.998811	771.119	0.100274	2.57792	-0.877082	15	288	(Kamprad and Goss, 2007)	Air (Log)	cm^3/g	CCCCCO	88.15	4.785	1.33	-3.455	-3.275	353	293	2.46687	2.54777	50.8017	20	-70.8017	-3.88593	0.31	0.32	3.08	0.46	0.87
162	1-Pentanol	000071-41-0	PUFF	1122.02	3.05	11.5809	1.06374	0.03	1.52712	-0.459138	33.6606	0.347426	2.58097	-0.874026	65	338	(Kamprad and Goss, 2007)	Air (Log)	cm^3/g	CCCCCO	88.15	4.785	1.33	-3.455	-3.275	353	293	2.46687	2.54777	50.8017	20	-70.8017	-1.98626	0.31	0.32	3.08	0.46	0.87
161	1-Pentanol	000071-41-0	PUFF	263.027	2.42	21.172	1.32576	0.03	0.897121	-0.197117	7.8908	0.63516	2.59102	-0.863982	95	368	(Kamprad and Goss, 2007)	Air (Log)	cm^3/g	CCCCCO	88.15	4.785	1.33	-3.455	-3.275	353	293	2.46687	2.54777	50.8017	20	-70.8017	-1.09424	0.31	0.32	3.08	0.46	0.87
895	1-Heptyne	000628-71-7	PUFF	1258.93	3.1	1599.01	3.20385	0.03	1.57712	1.68097	37.7678	47.9704	1.3417	1.8027	15	288	(Kamprad and Goss, 2007)	Air (Log)	cm^3/g	CCCCCC#C	96.17	2.549	3.01	0.461	0.461	5830	7000	3.8451	3.76567	38.679	20	-58.679	0.103852	0.09	0.1	3.09	0.37	1.01
894	1-Heptyne	000628-71-7	PUFF	457.088	2.66	2850.73	3.45496	0.03	1.13712	1.93208	13.7126	85.522	1.35725	1.81825	35	308	(Kamprad and Goss, 2007)	Air (Log)	cm^3/g	CCCCCC#C	96.17	2.549	3.01	0.461	0.461	5830	7000	3.8451	3.76567	38.679	20	-58.679	0.794957	0.09	0.1	3.09	0.37	1.01
893	1-Heptyne	000628-71-7	PUFF	138.038	2.14	6580.54	3.81826	0.03	0.617121	2.29538	4.14115	197.416	1.41949	1.88049	65	338	(Kamprad and Goss, 2007)	Air (Log)	cm^3/g	CCCCCC#C	96.17	2.549	3.01	0.461	0.461	5830	7000	3.8451	3.76567	38.679	20	-58.679	1.67826	0.09	0.1	3.09	0.37	1.01
892	1-Heptyne	000628-71-7	PUFF	79.4328	1.9	20775.4	4.31755	0.03	0.377121	2.79467	2.38298	623.263	1.66681	2.12781	95	368	(Kamprad and Goss, 2007)	Air (Log)	cm^3/g	CCCCCC#C	96.17	2.549	3.01	0.461	0.461	5830	7000	3.8451	3.76567	38.679	20	-58.679	2.41755	0.09	0.1	3.09	0.37	1.01
552	Dipropyl ether	000111-43-3	PUFF	549.541	2.74	21.9228	1.3409	0.03	1.21712	-0.181982	16.4862	0.657685	0.985747	-0.0602529	15	288	(Kamprad and Goss, 2007)	Air (Log)	cm^3/g	CCCOCCC	102.18	3.076	2.03	-1.046	-1.046	8640	8330	3.92065	3.93651	38.0145	20	-58.0145	-1.3991	0	0.25	3.1	0.35	1.01
551	Dipropyl ether	000111-43-3	PUFF	213.796	2.33	41.1315	1.61417	0.03	0.807121	0.091296	6.41389	1.23395	1.02347	-0.0225289	35	308	(Kamprad and Goss, 2007)	Air (Log)	cm^3/g	CCCOCCC	102.18	3.076	2.03	-1.046	-1.046	8640	8330	3.92065	3.93651	38.0145	20	-58.0145	-0.715825	0	0.25	3.1	0.35	1.01
550	Dipropyl ether	000111-43-3	PUFF	77.6247	1.89	111.552	2.04748	0.03	0.367121	0.524598	2.32874	3.34656	1.15571	0.10971	65	338	(Kamprad and Goss, 2007)	Air (Log)	cm^3/g	CCCOCCC	102.18	3.076	2.03	-1.046	-1.046	8640	8330	3.92065	3.93651	38.0145	20	-58.0145	0.157477	0	0.25	3.1	0.35	1.01
705	Heptane	000142-82-5	PUFF	323.594	2.51	1523.23	3.18277	0.03	0.987121	1.65989	9.70781	45.697	0.748617	1.78162	15	288	(Kamprad and Goss, 2007)	Air (Log)	cm^3/g	CCCCCCC	100.21	2.747	3.78	1.033	1.913	6120	6130	3.78746	3.78675	39.186	20	-59.186	0.672766	0	0.05	3.22	0.2	1.09
704	Heptane	000142-82-5	PUFF	144.544	2.16	3387.21	3.52984	0.03	0.637121	2.00696	4.33632	101.616	0.860138	1.89314	35	308	(Kamprad and Goss, 2007)	Air (Log)	cm^3/g	CCCCCCC	100.21	2.747	3.78	1.033	1.913	6120	6130	3.78746	3.78675	39.186	20	-59.186	1.36984	0	0.05	3.22	0.2	1.09
634	Butyl acetate	000123-86-4	PUFF	380.189	2.58	111.625	2.04776	0.03	1.05712	0.524884	11.4057	3.34876	1.98	0.109996	65	338	(Kamprad and Goss, 2007)	Air (Log)	cm^3/g	CCCCOC(=O)C	116.16	3.72	1.85	-1.87	-1.94	1590	1530	3.18469	3.2014	44.4879	20	-64.4879	-0.532237	0	0.37	3.34	0.59	1.03
639	n-Butyl acetate	000123-86-4	PUFF	125.893	2.1	240.014	2.38024	0.03	0.577121	0.857357	3.77678	7.20041	2.06049	0.190492	95	368	(Kamprad and Goss, 2007)	Air (Log)	cm^3/g	CCCCOC(=O)C	116.16	3.72	1.85	-1.87	-1.94	1590	1530	3.18469	3.2014	44.4879	20	-64.4879	0.280236	0	0.37	3.34	0.59	1.03
823	4-Fluorotoluene	000352-32-9	PUFF	1122.02	3.05	1039.63	3.01688	0.03	1.52712	1.494	33.6606	31.1888	1.76717	1.38017	35	308	(Kamprad and Goss, 2007)	Air (Log)	cm^3/g	CC1=CC=C(C=C1)F	110.13	3.127	2.74	-0.387	-0.547	2420	2800	3.44716	3.38382	42.1792	20	-62.1792	-0.0331228	0	0.12	3.36	0.6	0.87
822	4-Fluorotoluene	000352-32-9	PUFF	316.228	2.5	2528.55	3.40287	0.03	0.977121	1.87999	9.48683	75.8566	1.8521	1.4651	65	338	(Kamprad and Goss, 2007)	Air (Log)	cm^3/g	CC1=CC=C(C=C1)F	110.13	3.127	2.74	-0.387	-0.547	2420	2800	3.44716	3.38382	42.1792	20	-62.1792	0.902872	0	0.12	3.36	0.6	0.87
821	4-Fluorotoluene	000352-32-9	PUFF	154.882	2.19	7520.71	3.87626	0.03	0.667121	2.35338	4.64645	225.621	2.07351	1.68651	95	368	(Kamprad and Goss, 2007)	Air (Log)	cm^3/g	CC1=CC=C(C=C1)F	110.13	3.127	2.74	-0.387	-0.547	2420	2800	3.44716	3.38382	42.1792	20	-62.1792	1.68626	0	0.12	3.36	0.6	0.87
515	Toluene	000108-88-3	PUFF	2398.83	3.38	178.89	2.25259	0.03	1.85712	0.729708	71.965	5.36671	1.60744	0.851438	15	288	(Kamprad and Goss, 2007)	Air (Log)	cm^3/g	CC1=CC=CC=C1	92.14	3.296	2.54	-0.756	-0.566	3160	3790	3.57864	3.49969	41.0227	20	-61.0227	-1.12741	0	0.12	3.43	0.63	0.86
514	Toluene	000108-88-3	PUFF	870.964	2.94	339.856	2.5313	0.03	1.41712	1.00842	26.1289	10.1957	1.65059	0.894592	35	308	(Kamprad and Goss, 2007)	Air (Log)	cm^3/g	CC1=CC=CC=C1	92.14	3.296	2.54	-0.756	-0.566	3160	3790	3.57864	3.49969	41.0227	20	-61.0227	-0.408705	0	0.12	3.43	0.63	0.86
513	Toluene	000108-88-3	PUFF	269.153	2.43	870.726	2.93988	0.03	0.907121	1.417	8.0746	26.1218	1.75811	1.00211	65	338	(Kamprad and Goss, 2007)	Air (Log)	cm^3/g	CC1=CC=CC=C1	92.14	3.296	2.54	-0.756	-0.566	3160	3790	3.57864	3.49969	41.0227	20	-61.0227	0.509881	0	0.12	3.43	0.63	0.86
512	Toluene	000108-88-3	PUFF	112.202	2.05	2131.56	3.3287	0.03	0.527121	1.80582	3.36606	63.9468	1.89495	1.13895	95	368	(Kamprad and Goss, 2007)	Air (Log)	cm^3/g	CC1=CC=CC=C1	92.14	3.296	2.54	-0.756	-0.566	3160	3790	3.57864	3.49969	41.0227	20	-61.0227	1.2787	0	0.12	3.43	0.63	0.86
908	1,1,1,2-Tetrachloroethane	000630-20-6	PUFF	3235.94	3.51	767.439	2.88504	0.03	1.98712	1.36216	97.0781	23.0232	2.23934	1.24834	35	308	(Kamprad and Goss, 2007)	Air (Log)	cm^3/g	C(C(Cl)(Cl)Cl)Cl	167.85	3.921	2.93	-0.991	-0.991	1300	1600	3.20412	3.11394	44.317	20	-64.317	-0.624956	0	0.12	3.43	0.61	0.88
909	1,1,1,2-Tetrachloroethane	000630-20-6	PUFF	10964.8	4.04	454.503	2.65754	0.03	2.51712	1.13466	328.943	13.6351	2.24739	1.25639	15	288	(Kamprad and Goss, 2007)	Air (Log)	cm^3/g	C(C(Cl)(Cl)Cl)Cl	167.85	3.921	2.93	-0.991	-0.991	1300	1600	3.20412	3.11394	44.317	20	-64.317	-1.38246	0	0.12	3.43	0.61	0.88
907	1,1,1,2-Tetrachloroethane	000630-20-6	PUFF	812.831	2.91	1791.51	3.25322	0.03	1.38712	1.73034	24.3849	53.7452	2.30645	1.31545	65	338	(Kamprad and Goss, 2007)	Air (Log)	cm^3/g	C(C(Cl)(Cl)Cl)Cl	167.85	3.921	2.93	-0.991	-0.991	1300	1600	3.20412	3.11394	44.317	20	-64.317	0.343218	0	0.12	3.43	0.61	0.88
906	1,1,1,2-Tetrachloroethane	000630-20-6	PUFF	363.078	2.56	5170.57	3.71354	0.03	1.03712	2.19066	10.8923	155.117	2.51479	1.52379	95	368	(Kamprad and Goss, 2007)	Air (Log)	cm^3/g	C(C(Cl)(Cl)Cl)Cl	167.85	3.921	2.93	-0.991	-0.991	1300	1600	3.20412	3.11394	44.317	20	-64.317	1.15354	0	0.12	3.43	0.61	0.88
865	2-Hexanone	000591-78-6	PUFF	380.189	2.58	22.7895	1.35773	0.03	1.05712	-0.165145	11.4057	0.683684	1.97897	-0.580033	65	338	(Kamprad and Goss, 2007)	Air (Log)	cm^3/g	CCCCC(=O)C	100.16	3.799	1.24	-2.559	-2.419	1810	1550	3.19033	3.25768	44.4382	20	-64.4382	-1.22227	0	0.35	3.44	0.68	0.97
864	2-Hexanone	000591-78-6	PUFF	138.038	2.14	53.6515	1.72958	0.03	0.617121	0.206703	4.14115	1.60955	2.09884	-0.460162	95	368	(Kamprad and Goss, 2007)	Air (Log)	cm^3/g	CCCCC(=O)C	100.16	3.799	1.24	-2.559	-2.419	1810	1550	3.19033	3.25768	44.4382	20	-64.4382	-0.410418	0	0.35	3.44	0.68	0.97
544	1-Bromopentane	000110-53-2	PUFF	3630.78	3.56	700.924	2.84567	0.03	2.03712	1.32279	108.923	21.0277	1.76852	1.44452	15	288	(Kamprad and Goss, 2007)	Air (Log)	cm^3/g	CCCCCBr	151.05	3.464	3.14	-0.324	-0.094	1650	1680	3.22531	3.21748	44.1306	20	-64.1306	-0.714329	0	0.04	3.44	0.41	0.99
543	1-Bromopentane	000110-53-2	PUFF	1230.27	3.09	1352.02	3.13098	0.03	1.56712	1.6081	36.9081	40.5606	1.81828	1.49428	35	308	(Kamprad and Goss, 2007)	Air (Log)	cm^3/g	CCCCCBr	151.05	3.464	3.14	-0.324	-0.094	1650	1680	3.22531	3.21748	44.1306	20	-64.1306	0.0409829	0	0.04	3.44	0.41	0.99
542	1-Bromopentane	000110-53-2	PUFF	346.737	2.54	3518.45	3.54635	0.03	1.01712	2.02347	10.4021	105.554	1.93258	1.60858	65	338	(Kamprad and Goss, 2007)	Air (Log)	cm^3/g	CCCCCBr	151.05	3.464	3.14	-0.324	-0.094	1650	1680	3.22531	3.21748	44.1306	20	-64.1306	1.00635	0	0.04	3.44	0.41	0.99
541	1-Bromopentane	000110-53-2	PUFF	109.648	2.04	7150.29	3.85432	0.03	0.517121	2.33144	3.28943	214.509	1.98858	1.66458	95	368	(Kamprad and Goss, 2007)	Air (Log)	cm^3/g	CCCCCBr	151.05	3.464	3.14	-0.324	-0.094	1650	1680	3.22531	3.21748	44.1306	20	-64.1306	1.81432	0	0.04	3.44	0.41	0.99
530	2 Methylpyrazine	000109-08-0	PUFF	3890.45	3.59	1.58049	0.198791	0.03	2.06712	-1.32409	116.714	0.0474146	2.32809	-1.43791	35	308	(Kamprad and Goss, 2007)	Air (Log)	cm^3/g	CC1=NC=CN=C1	94.12	4.256	0.49	-3.766	-4.046	972	1070	3.02938	2.98767	45.8539	20	-65.8539	-3.39121	0	0.5	3.45	0.76	0.78
529	2 Methylpyrazine	000109-08-0	PUFF	912.011	2.96	3.63163	0.560101	0.03	1.43712	-0.962777	27.3603	0.108949	2.38833	-1.37767	65	338	(Kamprad and Goss, 2007)	Air (Log)	cm^3/g	CC1=NC=CN=C1	94.12	4.256	0.49	-3.766	-4.046	972	1070	3.02938	2.98767	45.8539	20	-65.8539	-2.3999	0	0.5	3.45	0.76	0.78
528	2 Methylpyrazine	000109-08-0	PUFF	295.121	2.47	7.93936	0.899785	0.03	0.947121	-0.623093	8.85363	0.238181	2.47604	-1.28996	95	368	(Kamprad and Goss, 2007)	Air (Log)	cm^3/g	CC1=NC=CN=C1	94.12	4.256	0.49	-3.766	-4.046	972	1070	3.02938	2.98767	45.8539	20	-65.8539	-1.57021	0	0.5	3.45	0.76	0.78
797	Cycloheptane	000291-64-5	PUFF	1202.26	3.08	895.783	2.9522	0.03	1.55712	1.42932	36.0679	26.8735	1.30105	1.55105	15	288	(Kamprad and Goss, 2007)	Air (Log)	cm^3/g	C1CCCCCC1	98.19	3.42	3.67	0.25	0.58	2680	2880	3.45939	3.42813	42.0716	20	-62.0716	-0.127797	0	0.02	3.51	0.28	0.99
796	Cycloheptane	000291-64-5	PUFF	467.735	2.67	1876.14	3.27326	0.03	1.14712	1.75039	14.0321	56.2841	1.38656	1.63656	35	308	(Kamprad and Goss, 2007)	Air (Log)	cm^3/g	C1CCCCCC1	98.19	3.42	3.67	0.25	0.58	2680	2880	3.45939	3.42813	42.0716	20	-62.0716	0.603265	0	0.02	3.51	0.28	0.99
795	Cycloheptane	000291-64-5	PUFF	199.526	2.3	6880.81	3.83764	0.03	0.777121	2.31476	5.98579	206.424	1.64987	1.89987	65	338	(Kamprad and Goss, 2007)	Air (Log)	cm^3/g	C1CCCCCC1	98.19	3.42	3.67	0.25	0.58	2680	2880	3.45939	3.42813	42.0716	20	-62.0716	1.53764	0	0.02	3.51	0.28	0.99
794	Cycloheptane	000291-64-5	PUFF	64.5654	1.81	13479.4	4.12967	0.03	0.287121	2.60679	1.93696	404.382	1.68993	1.93993	95	368	(Kamprad and Goss, 2007)	Air (Log)	cm^3/g	C1CCCCCC1	98.19	3.42	3.67	0.25	0.58	2680	2880	3.45939	3.42813	42.0716	20	-62.0716	2.31967	0	0.02	3.51	0.28	0.99
1062	Hexan-1-ol	025917-35-5	PUFF	2041.74	3.31	30.3307	1.48188	0.03	1.78712	-0.0409967	61.2521	0.90992	2.90911	-0.455885	65	338	(Kamprad and Goss, 2007)	Air (Log)	cm^3/g	CCCCCCO	102.18	5.185	1.82	-3.365	-3.155	117	124	2.09342	2.06819	54.0865	20	-74.0865	-1.82812	0.31	0.32	3.57	0.46	1.01
1061	Hexan-1-ol	025917-35-5	PUFF	501.187	2.7	63.8686	1.80529	0.03	1.17712	0.282409	15.0356	1.91606	2.98054	-0.384457	95	368	(Kamprad and Goss, 2007)	Air (Log)	cm^3/g	CCCCCCO	102.18	5.185	1.82	-3.365	-3.155	117	124	2.09342	2.06819	54.0865	20	-74.0865	-0.894713	0.31	0.32	3.57	0.46	1.01
899	1-Octyne	000629-05-0	PUFF	3388.44	3.53	4649.48	3.6674	0.03	2.00712	2.14453	101.653	139.484	1.74025	2.26625	15	288	(Kamprad and Goss, 2007)	Air (Log)	cm^3/g	CCCCCCC#C	110.2	2.974	3.5	0.526	0.526	1920	1810	3.25768	3.2833	43.8459	20	-63.8459	0.137404	0.09	0.1	3.58	0.37	1.15
898	1-Octyne	000629-05-0	PUFF	1096.48	3.04	8498.9	3.92936	0.03	1.51712	2.40648	32.8943	254.967	1.76666	2.29266	35	308	(Kamprad and Goss, 2007)	Air (Log)	cm^3/g	CCCCCCC#C	110.2	2.974	3.5	0.526	0.526	1920	1810	3.25768	3.2833	43.8459	20	-63.8459	0.889362	0.09	0.1	3.58	0.37	1.15
897	1-Octyne	000629-05-0	PUFF	263.027	2.42	18640	4.27045	0.03	0.897121	2.74757	7.8908	559.2	1.80668	2.33268	65	338	(Kamprad and Goss, 2007)	Air (Log)	cm^3/g	CCCCCCC#C	110.2	2.974	3.5	0.526	0.526	1920	1810	3.25768	3.2833	43.8459	20	-63.8459	1.85045	0.09	0.1	3.58	0.37	1.15
896	1-Octyne	000629-05-0	PUFF	100	2	45167.9	4.65483	0.03	0.477121	3.13195	3	1355.04	1.93909	2.46509	95	368	(Kamprad and Goss, 2007)	Air (Log)	cm^3/g	CCCCCCC#C	110.2	2.974	3.5	0.526	0.526	1920	1810	3.25768	3.2833	43.8459	20	-63.8459	2.65483	0.09	0.1	3.58	0.37	1.15
521	Chlorobenzene	000108-90-7	PUFF	8511.38	3.93	277.036	2.44254	0.03	2.40712	0.919658	255.341	8.31109	2.13739	1.04139	15	288	(Kamprad and Goss, 2007)	Air (Log)	cm^3/g	C1=CC=C(C=C1)Cl	112.56	3.736	2.64	-1.096	-0.896	1240	1600	3.20412	3.09342	44.317	20	-64.317	-1.48746	0	0.11	3.59	0.77	0.84
519	Chlorobenzene	000108-90-7	PUFF	645.654	2.81	1117.42	3.04822	0.03	1.28712	1.52534	19.3696	33.5227	2.20645	1.11045	65	338	(Kamprad and Goss, 2007)	Air (Log)	cm^3/g	C1=CC=C(C=C1)Cl	112.56	3.736	2.64	-1.096	-0.896	1240	1600	3.20412	3.09342	44.317	20	-64.317	0.238218	0	0.11	3.59	0.77	0.84
520	Chlorobenzene	000108-90-7	PUFF	3311.31	3.52	616.657	2.79004	0.03	1.99712	1.26716	99.3393	18.4997	2.24934	1.15334	35	308	(Kamprad and Goss, 2007)	Air (Log)	cm^3/g	C1=CC=C(C=C1)Cl	112.56	3.736	2.64	-1.096	-0.896	1240	1600	3.20412	3.09342	44.317	20	-64.317	-0.729956	0	0.11	3.59	0.77	0.84
518	Chlorobenzene	000108-90-7	PUFF	239.883	2.38	2682.49	3.42854	0.03	0.857121	1.90566	7.1965	80.4747	2.33479	1.23879	95	368	(Kamprad and Goss, 2007)	Air (Log)	cm^3/g	C1=CC=C(C=C1)Cl	112.56	3.736	2.64	-1.096	-0.896	1240	1600	3.20412	3.09342	44.317	20	-64.317	1.04854	0	0.11	3.59	0.77	0.84
560	1-Octene	000111-66-0	PUFF	1122.02	3.05	4326.89	3.63618	0.03	1.52712	2.1133	33.6606	129.807	1.26603	2.23503	15	288	(Kamprad and Goss, 2007)	Air (Log)	cm^3/g	CCCCCCC=C	112.22	3.161	4.13	0.969	1.409	2210	2320	3.36549	3.34439	42.8976	20	-62.8976	0.586176	0	0.1	3.66	0.26	1.19
559	1-Octene	000111-66-0	PUFF	416.869	2.62	8850.46	3.94697	0.03	1.09712	2.42409	12.5061	265.514	1.34126	2.31026	35	308	(Kamprad and Goss, 2007)	Air (Log)	cm^3/g	CCCCCCC=C	112.22	3.161	4.13	0.969	1.409	2210	2320	3.36549	3.34439	42.8976	20	-62.8976	1.32697	0	0.1	3.66	0.26	1.19
558	1-Octene	000111-66-0	PUFF	138.038	2.14	25928.3	4.41377	0.03	0.617121	2.8909	4.14115	777.849	1.50701	2.47601	65	338	(Kamprad and Goss, 2007)	Air (Log)	cm^3/g	CCCCCCC=C	112.22	3.161	4.13	0.969	1.409	2210	2320	3.36549	3.34439	42.8976	20	-62.8976	2.27377	0	0.1	3.66	0.26	1.19
557	1-Octene	000111-66-0	PUFF	52.4807	1.72	61124	4.78621	0.03	0.197121	3.26333	1.57442	1833.72	1.62747	2.59647	95	368	(Kamprad and Goss, 2007)	Air (Log)	cm^3/g	CCCCCCC=C	112.22	3.161	4.13	0.969	1.409	2210	2320	3.36549	3.34439	42.8976	20	-62.8976	3.06621	0	0.1	3.66	0.26	1.19
555	Octane	000111-65-9	PUFF	870.964	2.94	5758.19	3.76029	0.03	1.41712	2.23741	26.1289	172.746	1.15114	2.35914	15	288	(Kamprad and Goss, 2007)	Air (Log)	cm^3/g	CCCCCCCC	114.23	3.062	4.27	1.208	2.118	1980	1880	3.27416	3.29667	43.7009	20	-63.7009	0.820286	0	0.05	3.72	0.2	1.24
554	Octane	000111-65-9	PUFF	407.38	2.61	15154.4	4.18054	0.03	1.08712	2.65766	12.2214	454.631	1.33583	2.54383	35	308	(Kamprad and Goss, 2007)	Air (Log)	cm^3/g	CCCCCCCC	114.23	3.062	4.27	1.208	2.118	1980	1880	3.27416	3.29667	43.7009	20	-63.7009	1.57054	0	0.05	3.72	0.2	1.24
553	Octane	000111-65-9	PUFF	109.648	2.04	37105.5	4.56944	0.03	0.517121	3.04656	3.28943	1113.17	1.42367	2.63167	65	338	(Kamprad and Goss, 2007)	Air (Log)	cm^3/g	CCCCCCCC	114.23	3.062	4.27	1.208	2.118	1980	1880	3.27416	3.29667	43.7009	20	-63.7009	2.52944	0	0.05	3.72	0.2	1.24
524	Phenol	000108-95-2	PUFF	8709.64	3.94	47.0442	1.67251	0.03	2.41712	0.149627	261.289	1.41132	4.29876	-0.517239	95	368	(Kamprad and Goss, 2007)	Air (Log)	cm^3/g	C1=CC=C(C=C1)O	94.11	6.326	1.51	-4.816	-4.866	43	67.1	1.82672	1.63347	56.4324	20	-76.4324	-2.26749	0.5	0.39	3.78	0.9	0.78
434	Anisole	000100-66-3	PUFF	6309.57	3.8	280.921	2.44858	0.03	2.27712	0.925705	189.287	8.42763	2.55588	0.81188	35	308	(Kamprad and Goss, 2007)	Air (Log)	cm^3/g	COC1=CC=CC=C1	108.14	3.814	2.07	-1.744	-1.704	450	472	2.67394	2.65321	48.9803	20	-68.9803	-1.35142	0	0.33	3.8	0.79	0.92
433	Anisole	000100-66-3	PUFF	1445.44	3.16	703.003	2.84696	0.03	1.63712	1.32408	43.3632	21.0901	2.65319	0.90919	65	338	(Kamprad and Goss, 2007)	Air (Log)	cm^3/g	COC1=CC=CC=C1	108.14	3.814	2.07	-1.744	-1.704	450	472	2.67394	2.65321	48.9803	20	-68.9803	-0.313043	0	0.33	3.8	0.79	0.92
432	Anisole	000100-66-3	PUFF	416.869	2.62	1499.79	3.17603	0.03	1.09712	1.65315	12.5061	44.9937	2.73029	0.986286	95	368	(Kamprad and Goss, 2007)	Air (Log)	cm^3/g	COC1=CC=CC=C1	108.14	3.814	2.07	-1.744	-1.704	450	472	2.67394	2.65321	48.9803	20	-68.9803	0.55603	0	0.33	3.8	0.79	0.92
890	n-Pentyl acetate	000628-63-7	PUFF	794.328	2.9	373.079	2.5718	0.03	1.37712	1.04892	23.8298	11.1924	2.39403	0.634034	65	338	(Kamprad and Goss, 2007)	Air (Log)	cm^3/g	CCCCCOC(=O)C	130.19	4.1	2.34	-1.76	-1.8	555	467	2.66932	2.74429	49.021	20	-69.021	-0.328199	0	0.37	3.84	0.59	1.17
889	n-Pentyl acetate	000628-63-7	PUFF	295.121	2.47	1026.57	3.01139	0.03	0.947121	1.48851	8.85363	30.797	2.58164	0.821643	95	368	(Kamprad and Goss, 2007)	Air (Log)	cm^3/g	CCCCCOC(=O)C	130.19	4.1	2.34	-1.76	-1.8	555	467	2.66932	2.74429	49.021	20	-69.021	0.541387	0	0.37	3.84	0.59	1.17
420	Styrene	000100-42-5	PUFF	3801.89	3.58	892.726	2.95072	0.03	2.05712	1.42784	114.057	26.7818	2.32301	1.31401	35	308	(Kamprad and Goss, 2007)	Air (Log)	cm^3/g	C=CC1=CC=CC=C1	104.15	3.899	2.89	-1.009	-0.949	674	853	2.93095	2.82866	46.7197	20	-66.7197	-0.629282	0	0.17	3.86	0.7	0.96
419	Styrene	000100-42-5	PUFF	891.251	2.95	2113.79	3.32506	0.03	1.42712	1.80218	26.7375	63.4138	2.3963	1.3873	65	338	(Kamprad and Goss, 2007)	Air (Log)	cm^3/g	C=CC1=CC=CC=C1	104.15	3.899	2.89	-1.009	-0.949	674	853	2.93095	2.82866	46.7197	20	-66.7197	0.375062	0	0.17	3.86	0.7	0.96
418	Styrene	000100-42-5	PUFF	295.121	2.47	4849.03	3.68565	0.03	0.947121	2.16278	8.85363	145.471	2.50491	1.49591	95	368	(Kamprad and Goss, 2007)	Air (Log)	cm^3/g	C=CC1=CC=CC=C1	104.15	3.899	2.89	-1.009	-0.949	674	853	2.93095	2.82866	46.7197	20	-66.7197	1.21565	0	0.17	3.86	0.7	0.96
408	Ethylbenzene	000100-41-4	PUFF	5754.4	3.76	564.09	2.75135	0.03	2.23712	1.22847	172.632	16.9227	1.9622	1.3502	15	288	(Kamprad and Goss, 2007)	Air (Log)	cm^3/g	CCC1=CC=CC=C1	106.17	3.642	3.03	-0.612	-0.492	1010	1280	3.10721	3.00432	45.1694	20	-65.1694	-1.00865	0	0.12	3.92	0.64	1
407	Ethylbenzene	000100-41-4	PUFF	1949.84	3.29	1119.17	3.04889	0.03	1.76712	1.52602	58.4953	33.575	2.02419	1.41219	35	308	(Kamprad and Goss, 2007)	Air (Log)	cm^3/g	CCC1=CC=CC=C1	106.17	3.642	3.03	-0.612	-0.492	1010	1280	3.10721	3.00432	45.1694	20	-65.1694	-0.241105	0	0.12	3.92	0.64	1
406	Ethylbenzene	000100-41-4	PUFF	478.63	2.68	2629.67	3.4199	0.03	1.15712	1.89702	14.3589	78.89	2.09413	1.48213	65	338	(Kamprad and Goss, 2007)	Air (Log)	cm^3/g	CCC1=CC=CC=C1	106.17	3.642	3.03	-0.612	-0.492	1010	1280	3.10721	3.00432	45.1694	20	-65.1694	0.739901	0	0.12	3.92	0.64	1
405	Ethylbenzene	000100-41-4	PUFF	169.824	2.23	6179.6	3.79096	0.03	0.707121	2.26808	5.09473	185.388	2.21322	1.60122	95	368	(Kamprad and Goss, 2007)	Air (Log)	cm^3/g	CCC1=CC=CC=C1	106.17	3.642	3.03	-0.612	-0.492	1010	1280	3.10721	3.00432	45.1694	20	-65.1694	1.56096	0	0.12	3.92	0.64	1
540	2-Heptanone	000110-43-0	PUFF	245.471	2.39	185.321	2.26793	0.03	0.867121	0.745046	7.36413	5.55964	2.48918	0.0781809	95	368	(Kamprad and Goss, 2007)	Air (Log)	cm^3/g	CCCCCC(=O)C	114.19	4.141	1.73	-2.411	-2.161	655	515	2.71181	2.81624	48.6473	20	-68.6473	-0.122075	0	0.35	3.93	0.69	1.11
496	2,4-Dimethylpyridine	000108-47-4	PUFF	1584.89	3.2	12.0128	1.07964	0.03	1.67712	-0.443236	47.5468	0.360383	2.70188	-0.858124	65	338	(Kamprad and Goss, 2007)	Air (Log)	cm^3/g	CC1=CC(=NC=C1)C	107.16	5.46	1.9	-3.56	-3.56	359	423	2.62634	2.55509	49.399	20	-69.399	-2.12036	0	0.4	4.01	0.71	0.96
497	2,4-Dimethylpyridine	000108-47-4	PUFF	9332.54	3.97	6.38215	0.804967	0.03	2.44712	-0.717912	279.976	0.191464	2.72826	-0.831737	35	308	(Kamprad and Goss, 2007)	Air (Log)	cm^3/g	CC1=CC(=NC=C1)C	107.16	5.46	1.9	-3.56	-3.56	359	423	2.62634	2.55509	49.399	20	-69.399	-3.16503	0	0.4	4.01	0.71	0.96
495	2,4-Dimethyl pyridine	000108-47-4	PUFF	537.032	2.73	30.4783	1.48399	0.03	1.20712	-0.0388876	16.111	0.91435	2.85425	-0.705753	95	368	(Kamprad and Goss, 2007)	Air (Log)	cm^3/g	CC1=CC(=NC=C1)C	107.16	5.46	1.9	-3.56	-3.56	359	423	2.62634	2.55509	49.399	20	-69.399	-1.24601	0	0.4	4.01	0.71	0.96
713	Dibutyl ether	000142-96-1	PUFF	1096.48	3.04	408.4	2.61109	0.03	1.51712	1.08821	32.8943	12.252	1.78438	0.974382	35	308	(Kamprad and Goss, 2007)	Air (Log)	cm^3/g	CCCCOCCCC	130.23	3.82	3.01	-0.81	-0.61	1030	801	2.90363	3.01284	46.96	20	-66.96	-0.428914	0	0.26	4.09	0.35	1.29
712	Dibutyl ether	000142-96-1	PUFF	275.423	2.44	1044.83	3.01905	0.03	0.917121	1.49617	8.26269	31.345	1.89128	1.08128	65	338	(Kamprad and Goss, 2007)	Air (Log)	cm^3/g	CCCCOCCCC	130.23	3.82	3.01	-0.81	-0.61	1030	801	2.90363	3.01284	46.96	20	-66.96	0.579047	0	0.26	4.09	0.35	1.29
711	Dibutyl ether	000142-96-1	PUFF	109.648	2.04	2901.79	3.46267	0.03	0.517121	1.93979	3.28943	87.0537	2.08292	1.27292	95	368	(Kamprad and Goss, 2007)	Air (Log)	cm^3/g	CCCCOCCCC	130.23	3.82	3.01	-0.81	-0.61	1030	801	2.90363	3.01284	46.96	20	-66.96	1.42267	0	0.26	4.09	0.35	1.29
845	1,3-Dichlorobenzene	000541-73-1	PUFF	11749	4.07	1796.39	3.2544	0.03	2.54712	1.73152	352.469	53.8916	2.8367	1.6177	35	308	(Kamprad and Goss, 2007)	Air (Log)	cm^3/g	C1=CC(=CC(=C1)Cl)Cl	147	4.499	3.28	-1.219	-0.969	180	287	2.45788	2.25527	50.8808	20	-70.8808	-0.8156	0	0.05	4.12	0.84	0.96
844	1,3-Dichlorobenzene	000541-73-1	PUFF	2344.23	3.37	4181.97	3.62138	0.03	1.84712	2.0985	70.3269	125.459	2.90261	1.68361	65	338	(Kamprad and Goss, 2007)	Air (Log)	cm^3/g	C1=CC(=CC(=C1)Cl)Cl	147	4.499	3.28	-1.219	-0.969	180	287	2.45788	2.25527	50.8808	20	-70.8808	0.251381	0	0.05	4.12	0.84	0.96
843	1,3-Dichlorobenzene	000541-73-1	PUFF	676.083	2.83	9427.52	3.9744	0.03	1.30712	2.45152	20.2825	282.825	3.00365	1.78465	95	368	(Kamprad and Goss, 2007)	Air (Log)	cm^3/g	C1=CC(=CC(=C1)Cl)Cl	147	4.499	3.28	-1.219	-0.969	180	287	2.45788	2.25527	50.8808	20	-70.8808	1.1444	0	0.05	4.12	0.84	0.96
122	Aniline	000062-53-3	PUFF	9772.37	3.99	47.2825	1.6747	0.03	2.46712	0.151821	293.171	1.41847	3.63993	-0.263067	65	338	(Kamprad and Goss, 2007)	Air (Log)	cm^3/g	C1=CC=C(C=C1)N	93.13	4.983	1.08	-3.903	-4.083	105	65.3	1.81491	2.02119	56.5363	20	-76.5363	-2.3153	0.23	0.43	4.14	1.08	0.82
121	Aniline	000062-53-3	PUFF	2187.76	3.34	97.4921	1.98897	0.03	1.81712	0.46609	65.6328	2.92476	3.70222	-0.200775	95	368	(Kamprad and Goss, 2007)	Air (Log)	cm^3/g	C1=CC=C(C=C1)N	93.13	4.983	1.08	-3.903	-4.083	105	65.3	1.81491	2.02119	56.5363	20	-76.5363	-1.35103	0.23	0.43	4.14	1.08	0.82
506	Bromobenzene	000108-86-1	PUFF	19498.4	4.29	586.142	2.768	0.03	2.76712	1.24512	584.953	17.5843	2.47285	1.36685	15	288	(Kamprad and Goss, 2007)	Air (Log)	cm^3/g	C1=CC=C(C=C1)Br	157.01	3.986	2.88	-1.106	-0.996	404	557	2.74586	2.60638	48.3478	20	-68.3478	-1.522	0	0.11	4.14	0.85	0.89
505	Bromobenzene	000108-86-1	PUFF	8128.31	3.91	1559.5	3.19298	0.03	2.38712	1.67011	243.849	46.7849	2.66228	1.55628	35	308	(Kamprad and Goss, 2007)	Air (Log)	cm^3/g	C1=CC=C(C=C1)Br	157.01	3.986	2.88	-1.106	-0.996	404	557	2.74586	2.60638	48.3478	20	-68.3478	-0.717016	0	0.11	4.14	0.85	0.89
504	Bromobenzene	000108-86-1	PUFF	1548.82	3.19	3175.67	3.50184	0.03	1.66712	1.97896	46.4645	95.2701	2.67007	1.56407	65	338	(Kamprad and Goss, 2007)	Air (Log)	cm^3/g	C1=CC=C(C=C1)Br	157.01	3.986	2.88	-1.106	-0.996	404	557	2.74586	2.60638	48.3478	20	-68.3478	0.311836	0	0.11	4.14	0.85	0.89
503	Bromobenzene	000108-86-1	PUFF	446.684	2.65	6651.8	3.82294	0.03	1.12712	2.30006	13.4005	199.554	2.7392	1.6332	95	368	(Kamprad and Goss, 2007)	Air (Log)	cm^3/g	C1=CC=C(C=C1)Br	157.01	3.986	2.88	-1.106	-0.996	404	557	2.74586	2.60638	48.3478	20	-68.3478	1.17294	0	0.11	4.14	0.85	0.89
652	1-Nonene	000124-11-8	PUFF	3019.95	3.48	11323.3	4.05397	0.03	1.95712	2.53109	90.5986	339.698	1.66882	2.65282	15	288	(Kamprad and Goss, 2007)	Air (Log)	cm^3/g	CCCCCCCC=C	126.24	3.636	4.62	0.984	1.514	785	720	2.85733	2.89487	47.3673	20	-67.3673	0.573971	0	0.1	4.15	0.26	1.33
651	1-Nonene	000124-11-8	PUFF	1023.29	3.01	23845.3	4.3774	0.03	1.48712	2.85452	30.6988	715.36	1.7567	2.7407	35	308	(Kamprad and Goss, 2007)	Air (Log)	cm^3/g	CCCCCCCC=C	126.24	3.636	4.62	0.984	1.514	785	720	2.85733	2.89487	47.3673	20	-67.3673	1.3674	0	0.1	4.15	0.26	1.33
650	1-Nonene	000124-11-8	PUFF	257.04	2.41	61872.1	4.79149	0.03	0.887121	3.26862	7.71119	1856.16	1.86973	2.85373	65	338	(Kamprad and Goss, 2007)	Air (Log)	cm^3/g	CCCCCCCC=C	126.24	3.636	4.62	0.984	1.514	785	720	2.85733	2.89487	47.3673	20	-67.3673	2.38149	0	0.1	4.15	0.26	1.33
649	1-Nonene	000124-11-8	PUFF	91.2011	1.96	154969	5.19025	0.03	0.437121	3.66737	2.73603	4649.07	2.0165	3.0005	95	368	(Kamprad and Goss, 2007)	Air (Log)	cm^3/g	CCCCCCCC=C	126.24	3.636	4.62	0.984	1.514	785	720	2.85733	2.89487	47.3673	20	-67.3673	3.23025	0	0.1	4.15	0.26	1.33
427	Benzonitrile	000100-47-0	PUFF	28840.3	4.46	156.275	2.19389	0.03	2.93712	0.671012	865.209	4.68826	3.24919	0.557187	35	308	(Kamprad and Goss, 2007)	Air (Log)	cm^3/g	C1=CC=C(C=C1)C#N	103.12	4.232	1.54	-2.692	-2.672	74.8	102	2.0086	1.8739	54.8326	20	-74.8326	-2.26611	0	0.26	4.2	1.17	0.87
426	Benzonitrile	000100-47-0	PUFF	5495.41	3.74	398.436	2.60036	0.03	2.21712	1.07748	164.862	11.9531	3.35459	0.662592	65	338	(Kamprad and Goss, 2007)	Air (Log)	cm^3/g	C1=CC=C(C=C1)C#N	103.12	4.232	1.54	-2.692	-2.672	74.8	102	2.0086	1.8739	54.8326	20	-74.8326	-1.13964	0	0.26	4.2	1.17	0.87
425	Benzonitrile	000100-47-0	PUFF	1445.44	3.16	918.68	2.96316	0.03	1.63712	1.44029	43.3632	27.5604	3.46542	0.77342	95	368	(Kamprad and Goss, 2007)	Air (Log)	cm^3/g	C1=CC=C(C=C1)C#N	103.12	4.232	1.54	-2.692	-2.672	74.8	102	2.0086	1.8739	54.8326	20	-74.8326	-0.196836	0	0.26	4.2	1.17	0.87
568	Nonane	000111-84-2	PUFF	2691.53	3.43	18554.9	4.26846	0.03	1.90712	2.74558	80.746	556.648	1.61431	2.86731	15	288	(Kamprad and Goss, 2007)	Air (Log)	cm^3/g	CCCCCCCCC	128.26	3.507	4.76	1.253	2.143	661	593	2.77305	2.8202	48.1086	20	-68.1086	0.838459	0	0.05	4.21	0.2	1.38
567	Nonane	000111-84-2	PUFF	912.011	2.96	39867.8	4.60062	0.03	1.43712	3.07774	27.3603	1196.03	1.71092	2.96392	35	308	(Kamprad and Goss, 2007)	Air (Log)	cm^3/g	CCCCCCCCC	128.26	3.507	4.76	1.253	2.143	661	593	2.77305	2.8202	48.1086	20	-68.1086	1.64062	0	0.05	4.21	0.2	1.38
566	Nonane	000111-84-2	PUFF	229.087	2.36	106138	5.02587	0.03	0.837121	3.50299	6.8726	3184.15	1.83511	3.08811	65	338	(Kamprad and Goss, 2007)	Air (Log)	cm^3/g	CCCCCCCCC	128.26	3.507	4.76	1.253	2.143	661	593	2.77305	2.8202	48.1086	20	-68.1086	2.66587	0	0.05	4.21	0.2	1.38
565	Nonane	000111-84-2	PUFF	85.1138	1.93	284421	5.45396	0.03	0.407121	3.93108	2.55341	8532.64	2.01122	3.26422	95	368	(Kamprad and Goss, 2007)	Air (Log)	cm^3/g	CCCCCCCCC	128.26	3.507	4.76	1.253	2.143	661	593	2.77305	2.8202	48.1086	20	-68.1086	3.52396	0	0.05	4.21	0.2	1.38
374	2-Methylphenol	000095-48-7	PUFF	8709.64	3.94	259.263	2.41374	0.03	2.41712	0.890862	261.289	7.7779	4.423	0.223997	95	368	(Kamprad and Goss, 2007)	Air (Log)	cm^3/g	CC1=CC=CC=C1O	108.14	6.259	2.06	-4.199	-4.309	33.4	25.3	1.40312	1.52375	60.1583	20	-80.1583	-1.52626	0.5	0.39	4.25	0.85	0.92
493	3-Methylphenol	000108-39-4	PUFF	13182.6	4.12	320.552	2.5059	0.03	2.59712	0.983019	395.477	9.61655	4.67215	0.316154	95	368	(Kamprad and Goss, 2007)	Air (Log)	cm^3/g	CC1=CC(=CC=C1)O	108.14	6.416	2.06	-4.356	-4.456	22.3	14.7	1.16732	1.3483	62.2324	20	-82.2324	-1.6141	0.5	0.39	4.25	0.85	0.92
469	4-Methylphenol	000106-44-5	PUFF	12882.5	4.11	357.473	2.55324	0.03	2.58712	1.03036	386.475	10.7242	4.6315	0.363499	95	368	(Kamprad and Goss, 2007)	Air (Log)	cm^3/g	CC1=CC=C(C=C1)O	108.14	6.328	2.06	-4.268	-4.388	16.6	18.7	1.27184	1.22011	61.313	20	-81.313	-1.55676	0.5	0.39	4.25	0.85	0.92
431	Benzaldehyde	000100-52-7	PUFF	17782.8	4.25	85.6867	1.93291	0.03	2.72712	0.410035	533.484	2.5706	3.02821	0.29621	35	308	(Kamprad and Goss, 2007)	Air (Log)	cm^3/g	C1=CC=C(C=C1)C=O	106.13	4.442	1.71	-2.732	-2.962	135	169	2.22789	2.13033	52.9038	20	-72.9038	-2.31709	0	0.4	4.27	1.18	0.87
430	Benzaldehyde	000100-52-7	PUFF	3311.31	3.52	199.686	2.30035	0.03	1.99712	0.777468	99.3393	5.99057	3.09458	0.36258	65	338	(Kamprad and Goss, 2007)	Air (Log)	cm^3/g	C1=CC=C(C=C1)C=O	106.13	4.442	1.71	-2.732	-2.962	135	169	2.22789	2.13033	52.9038	20	-72.9038	-1.21965	0	0.4	4.27	1.18	0.87
429	Benzaldehyde	000100-52-7	PUFF	758.578	2.88	379.185	2.57885	0.03	1.35712	1.05597	22.7573	11.3755	3.12111	0.389107	95	368	(Kamprad and Goss, 2007)	Air (Log)	cm^3/g	C1=CC=C(C=C1)C=O	106.13	4.442	1.71	-2.732	-2.962	135	169	2.22789	2.13033	52.9038	20	-72.9038	-0.301149	0	0.4	4.27	1.18	0.87
428	Benzyl alcohol	000100-51-6	PUFF	5370.32	3.73	40.8834	1.61155	0.03	2.20712	0.0886688	161.11	1.2265	4.3028	-0.578197	95	368	(Kamprad and Goss, 2007)	Air (Log)	cm^3/g	C1=CC=C(C=C1)CO	108.14	5.961	1.08	-4.881	-4.861	7.14	12.5	1.09691	0.853698	62.8517	20	-82.8517	-2.11845	0.31	0.53	4.28	0.84	0.92
792	Benzofuran	000271-89-6	PUFF	17782.8	4.25	776.074	2.8899	0.03	2.72712	1.36702	533.484	23.2822	3.0512	1.2532	35	308	(Kamprad and Goss, 2007)	Air (Log)	cm^3/g	C1=CC=C2C(=C1)C=CO2	118.14	4.338	2.54	-1.798	-1.668	172	58.7	1.76864	2.23553	56.9433	20	-76.9433	-1.3601	0	0.21	4.41	0.89	0.91
791	Benzofuran	000271-89-6	PUFF	3235.94	3.51	2033.03	3.30814	0.03	1.98712	1.78527	97.0781	60.9909	3.16838	1.37038	65	338	(Kamprad and Goss, 2007)	Air (Log)	cm^3/g	C1=CC=C2C(=C1)C=CO2	118.14	4.338	2.54	-1.798	-1.668	172	58.7	1.76864	2.23553	56.9433	20	-76.9433	-0.201856	0	0.21	4.41	0.89	0.91
790	Benzofuran	000271-89-6	PUFF	977.237	2.99	5721.91	3.75754	0.03	1.46712	2.23466	29.3171	171.657	3.3658	1.5678	95	368	(Kamprad and Goss, 2007)	Air (Log)	cm^3/g	C1=CC=C2C(=C1)C=CO2	118.14	4.338	2.54	-1.798	-1.668	172	58.7	1.76864	2.23553	56.9433	20	-76.9433	0.767541	0	0.21	4.41	0.89	0.91
447	n-Propylbenzene	000103-65-1	PUFF	3981.07	3.6	2859.79	3.45633	0.03	2.07712	1.93346	119.432	85.7936	2.35663	1.81963	35	308	(Kamprad and Goss, 2007)	Air (Log)	cm^3/g	CCCC1=CC=CC=C1	120.2	4.057	3.52	-0.537	-0.367	348	456	2.65896	2.54158	49.1121	20	-69.1121	-0.143666	0	0.12	4.42	0.64	1.14
446	n-Propylbenzene	000103-65-1	PUFF	891.251	2.95	7025.71	3.84669	0.03	1.42712	2.32381	26.7375	210.771	2.44592	1.90892	65	338	(Kamprad and Goss, 2007)	Air (Log)	cm^3/g	CCCC1=CC=CC=C1	120.2	4.057	3.52	-0.537	-0.367	348	456	2.65896	2.54158	49.1121	20	-69.1121	0.89669	0	0.12	4.42	0.64	1.14
445	n-Propylbenzene	000103-65-1	PUFF	295.121	2.47	17275.2	4.23742	0.03	0.947121	2.71454	8.85363	518.256	2.58468	2.04768	95	368	(Kamprad and Goss, 2007)	Air (Log)	cm^3/g	CCCC1=CC=CC=C1	120.2	4.057	3.52	-0.537	-0.367	348	456	2.65896	2.54158	49.1121	20	-69.1121	1.76742	0	0.12	4.42	0.64	1.14
403	Nitrobenzene	000098-95-3	PUFF	11481.5	4.06	451.343	2.65451	0.03	2.53712	1.13163	344.446	13.5403	3.76474	0.716739	65	338	(Kamprad and Goss, 2007)	Air (Log)	cm^3/g	C1=CC=C(C=C1)[N+](=O)[O-]	123.11	4.858	1.81	-3.048	-3.008	27.9	32.7	1.51455	1.4456	59.1782	20	-79.1782	-1.40549	0	0.21	4.44	1.26	0.89
402	Nitrobenzene	000098-95-3	PUFF	2630.27	3.42	1028.16	3.01206	0.03	1.89712	1.48918	78.908	30.8448	3.87032	0.822317	95	368	(Kamprad and Goss, 2007)	Air (Log)	cm^3/g	C1=CC=C(C=C1)[N+](=O)[O-]	123.11	4.858	1.81	-3.048	-3.008	27.9	32.7	1.51455	1.4456	59.1782	20	-79.1782	-0.407939	0	0.21	4.44	1.26	0.89
388	2-Chlorophenol	000095-57-8	PUFF	3715.35	3.57	383.655	2.58394	0.03	2.04712	1.06106	111.461	11.5097	3.7232	0.394197	95	368	(Kamprad and Goss, 2007)	Air (Log)	cm^3/g	C1=CC=C(C(=C1)O)Cl	128.56	5.489	2.16	-3.329	-3.339	95.5	337	2.52763	1.98	50.2673	20	-70.2673	-0.986059	0.33	0.3	4.48	0.84	0.9
389	2-Chlorophenol	000095-57-8	PUFF	20893	4.32	280.966	2.44865	0.03	2.79712	0.925775	626.789	8.42899	3.83989	0.510887	65	338	(Kamprad and Goss, 2007)	Air (Log)	cm^3/g	C1=CC=C(C(=C1)O)Cl	128.56	5.489	2.16	-3.329	-3.339	95.5	337	2.52763	1.98	50.2673	20	-70.2673	-1.87135	0.33	0.3	4.48	0.84	0.9
397	Acetophenone	000098-86-2	PUFF	1737.8	3.24	344.979	2.53779	0.03	1.71712	1.01491	52.134	10.3494	3.62905	0.348048	95	368	(Kamprad and Goss, 2007)	Air (Log)	cm^3/g	CC(=O)C1=CC=CC=C1	120.15	4.951	1.67	-3.281	-3.371	43.5	52.9	1.72346	1.63849	57.3407	20	-77.3407	-0.702208	0	0.42	4.63	1.13	1.01
622	N,N-Dimethylaniline	000121-69-7	PUFF	4786.3	3.68	292.028	2.46542	0.03	2.15712	0.942545	143.589	8.76083	3.30166	0.527657	65	338	(Kamprad and Goss, 2007)	Air (Log)	cm^3/g	CN(C)C1=CC=CC=C1	121.18	4.944	2.17	-2.774	-2.634	66.6	93.3	1.96988	1.82347	55.1732	20	-75.1732	-1.21458	0	0.46	4.63	0.91	1.1
621	N,N-Dimethylaniline	000121-69-7	PUFF	1288.25	3.11	695.856	2.84252	0.03	1.58712	1.31964	38.6475	20.8757	3.42678	0.652775	95	368	(Kamprad and Goss, 2007)	Air (Log)	cm^3/g	CN(C)C1=CC=CC=C1	121.18	4.944	2.17	-2.774	-2.634	66.6	93.3	1.96988	1.82347	55.1732	20	-75.1732	-0.26748	0	0.46	4.63	0.91	1.1
1245	Indane	056573-11-6	PUFF	10471.3	4.02	433.203	2.63669	0.03	2.49712	1.11381	314.139	12.9961	2.79499	0.999987	35	308	(Kamprad and Goss, 2007)	Air (Log)	cm^3/g	C1CC2=CC=CC=C2C1	118.18	5.265	3.47	-1.795	-2.085	142	196	2.29226	2.15229	52.3376	20	-72.3376	-1.38331	0	0.1	4.68	0.67	1.03
1244	Indane	056573-11-6	PUFF	2187.76	3.34	1110.71	3.0456	0.03	1.81712	1.52272	65.6328	33.3214	2.90283	1.10783	65	338	(Kamprad and Goss, 2007)	Air (Log)	cm^3/g	C1CC2=CC=CC=C2C1	118.18	5.265	3.47	-1.795	-2.085	142	196	2.29226	2.15229	52.3376	20	-72.3376	-0.294398	0	0.1	4.68	0.67	1.03
1243	Indane	056573-11-6	PUFF	691.831	2.84	2864	3.45697	0.03	1.31712	1.93409	20.7549	85.9199	3.06223	1.26723	95	368	(Kamprad and Goss, 2007)	Air (Log)	cm^3/g	C1CC2=CC=CC=C2C1	118.18	5.265	3.47	-1.795	-2.085	142	196	2.29226	2.15229	52.3376	20	-72.3376	0.616973	0	0.1	4.68	0.67	1.03
658	Decane	000124-18-5	PUFF	7413.1	3.87	982016	5.99212	0.03	2.34712	4.46924	222.393	29460.5	2.02797	4.59097	15	288	(Kamprad and Goss, 2007)	Air (Log)	cm^3/g	CCCCCCCCCC	142.29	2.687	5.25	2.563	2.323	231	191	2.28103	2.36361	52.4363	20	-72.4363	2.12212	0	0.05	4.71	0.21	1.52
657	Decane	000124-18-5	PUFF	2290.87	3.36	2.16398e+06	6.33525	0.03	1.83712	4.81237	68.726	64919.3	2.13555	4.69855	35	308	(Kamprad and Goss, 2007)	Air (Log)	cm^3/g	CCCCCCCCCC	142.29	2.687	5.25	2.563	2.323	231	191	2.28103	2.36361	52.4363	20	-72.4363	2.97525	0	0.05	4.71	0.21	1.52
656	Decane	000124-18-5	PUFF	489.779	2.69	5.69704e+06	6.75565	0.03	1.16712	5.23277	14.6934	170911	2.25488	4.81788	65	338	(Kamprad and Goss, 2007)	Air (Log)	cm^3/g	CCCCCCCCCC	142.29	2.687	5.25	2.563	2.323	231	191	2.28103	2.36361	52.4363	20	-72.4363	4.06565	0	0.05	4.71	0.21	1.52
655	Decane	000124-18-5	PUFF	199.526	2.3	1.89786e+07	7.27826	0.03	0.777121	5.75539	5.98579	569358	2.52552	5.08852	95	368	(Kamprad and Goss, 2007)	Air (Log)	cm^3/g	CCCCCCCCCC	142.29	2.687	5.25	2.563	2.323	231	191	2.28103	2.36361	52.4363	20	-72.4363	4.97826	0	0.05	4.71	0.21	1.52
615	1,2,4-Trichlorobenzene	000120-82-1	PUFF	9549.93	3.98	17648.6	4.24671	0.03	2.45712	2.72383	286.498	529.457	3.63494	2.30894	65	338	(Kamprad and Goss, 2007)	Air (Log)	cm^3/g	C1=CC(=C(C=C1Cl)Cl)Cl	181.45	5.256	3.93	-1.326	-1.236	24.4	61.3	1.78746	1.38739	56.7777	20	-76.7777	0.266709	0	0.03	4.78	0.95	1.08
614	1,2,4-Trichlorobenzene	000120-82-1	PUFF	2290.87	3.36	39266.4	4.59402	0.03	1.83712	3.07114	68.726	1177.99	3.73028	2.40428	95	368	(Kamprad and Goss, 2007)	Air (Log)	cm^3/g	C1=CC(=C(C=C1Cl)Cl)Cl	181.45	5.256	3.93	-1.326	-1.236	24.4	61.3	1.78746	1.38739	56.7777	20	-76.7777	1.23402	0	0.03	4.78	0.95	1.08
380	2-Chloroaniline	000095-51-2	PUFF	5495.41	3.74	368.568	2.56652	0.03	2.21712	1.04364	164.862	11.057	4.21377	0.376774	95	368	(Kamprad and Goss, 2007)	Air (Log)	cm^3/g	C1=CC=C(C(=C1)N)Cl	127.57	5.557	1.72	-3.837	-3.657	30.9	27.2	1.43457	1.48996	59.8817	20	-79.8817	-1.17348	0.23	0.42	4.88	1.16	0.94
329	2-Nitrotoluene	000088-72-2	PUFF	3388.44	3.53	937.027	2.97175	0.03	2.00712	1.44887	101.653	28.1108	4.01401	0.782008	95	368	(Kamprad and Goss, 2007)	Air (Log)	cm^3/g	CC1=CC=CC=C1[N+](=O)[O-]	137.14	5.592	2.36	-3.232	-3.292	15.8	25.1	1.39967	1.19866	60.1886	20	-80.1886	-0.558248	0	0.21	4.91	1.2	1.03
451	Butylbenzene	000104-51-8	PUFF	10471.3	4.02	7618.18	3.88185	0.03	2.49712	2.35897	314.139	228.545	2.80215	2.24515	35	308	(Kamprad and Goss, 2007)	Air (Log)	cm^3/g	CCCCC1=CC=CC=C1	134.22	4.567	4.01	-0.557	-0.187	110	141	2.14922	2.04139	53.5957	20	-73.5957	-0.138149	0	0.13	4.91	0.65	1.28
450	Butylbenzene	000104-51-8	PUFF	1995.26	3.3	18608.1	4.2697	0.03	1.77712	2.74682	59.8579	558.242	2.88893	2.33193	65	338	(Kamprad and Goss, 2007)	Air (Log)	cm^3/g	CCCCC1=CC=CC=C1	134.22	4.567	4.01	-0.557	-0.187	110	141	2.14922	2.04139	53.5957	20	-73.5957	0.969701	0	0.13	4.91	0.65	1.28
449	Butyl benzene	000104-51-8	PUFF	549.541	2.74	43343.4	4.63692	0.03	1.21712	3.11404	16.4862	1300.3	3.00418	2.44718	95	368	(Kamprad and Goss, 2007)	Air (Log)	cm^3/g	CCCCC1=CC=CC=C1	134.22	4.567	4.01	-0.557	-0.187	110	141	2.14922	2.04139	53.5957	20	-73.5957	1.89692	0	0.13	4.91	0.65	1.28
698	Benzyl acetate	000140-11-4	PUFF	2630.27	3.42	770.195	2.8866	0.03	1.89712	1.36372	78.908	23.1059	3.91186	0.696857	95	368	(Kamprad and Goss, 2007)	Air (Log)	cm^3/g	CC(=O)OCC1=CC=CC=C1	150.18	5.295	2.08	-3.215	-3.335	25	23.6	1.37291	1.39794	60.424	20	-80.424	-0.533399	0	0.45	5.03	1.04	1.21
324	2,6-Dichlorophenol	000087-65-0	PUFF	14791.1	4.17	1063.68	3.02681	0.03	2.64712	1.50393	443.733	31.9105	4.74907	0.837069	95	368	(Kamprad and Goss, 2007)	Air (Log)	cm^3/g	C1=CC(=C(C(=C1)Cl)O)Cl	163	6.712	2.8	-3.912	-3.962	3.02	11.9	1.07555	0.480007	63.0396	20	-83.0396	-1.14319	0.25	0.19	5.06	0.83	1.02
323	2,6-Dimethylaniline	000087-62-7	PUFF	4168.69	3.62	483.231	2.68415	0.03	2.09712	1.16128	125.061	14.4969	4.15141	0.49441	95	368	(Kamprad and Goss, 2007)	Air (Log)	cm^3/g	CC1=C(C(=CC=C1)C)N	121.18	5.827	2.17	-3.657	-3.987	22.6	17.3	1.23805	1.35411	61.6103	20	-81.6103	-0.935845	0.08	0.43	5.08	0.97	1.1
920	Dipentyl ether	000693-65-2	PUFF	6918.31	3.84	6244.14	3.79547	0.03	2.31712	2.27259	207.549	187.324	2.62677	2.15877	35	308	(Kamprad and Goss, 2007)	Air (Log)	cm^3/g	CCCCCOCCCCC	158.29	4.468	4	-0.468	-0.468	111	114	2.0569	2.04532	54.4077	20	-74.4077	-0.0445274	0	0.27	5.08	0.36	1.58
919	Dipentyl ether	000693-65-2	PUFF	1318.26	3.12	15687.2	4.19555	0.03	1.59712	2.67267	39.5477	470.616	2.72578	2.25778	65	338	(Kamprad and Goss, 2007)	Air (Log)	cm^3/g	CCCCCOCCCCC	158.29	4.468	4	-0.468	-0.468	111	114	2.0569	2.04532	54.4077	20	-74.4077	1.07555	0	0.27	5.08	0.36	1.58
918	Dipentyl ether	000693-65-2	PUFF	338.844	2.53	34913.8	4.543	0.03	1.00712	3.02012	10.1653	1047.41	2.82125	2.35325	95	368	(Kamprad and Goss, 2007)	Air (Log)	cm^3/g	CCCCCOCCCCC	158.29	4.468	4	-0.468	-0.468	111	114	2.0569	2.04532	54.4077	20	-74.4077	2.013	0	0.27	5.08	0.36	1.58
854	2,3-Dichlorophenol	000576-24-9	PUFF	20417.4	4.31	125.302	2.09796	0.03	2.78712	0.575081	612.521	3.75907	4.84822	-0.0917847	95	368	(Kamprad and Goss, 2007)	Air (Log)	cm^3/g	C1=CC(=C(C(=C1)Cl)Cl)O	163	7.74	2.8	-4.94	-4.9	8.17	16.4	1.21484	0.912222	61.8144	20	-81.8144	-2.21204	0.52	0.23	5.14	0.91	1.02
961	Undecane	001120-21-4	PUFF	5888.44	3.77	1.27749e+06	6.10636	0.03	2.24712	4.58348	176.653	38324.8	2.57265	4.46965	35	308	(Kamprad and Goss, 2007)	Air (Log)	cm^3/g	CCCCCCCCCCC	156.31	3.843	5.74	1.897	1.897	83.8	54.9	1.73957	1.92324	57.1989	20	-77.1989	2.33636	0	0.06	5.2	0.21	1.66
960	Undecane	001120-21-4	PUFF	1148.15	3.06	3.61782e+06	6.55845	0.03	1.53712	5.03557	34.4446	108535	2.72368	4.62068	65	338	(Kamprad and Goss, 2007)	Air (Log)	cm^3/g	CCCCCCCCCCC	156.31	3.843	5.74	1.897	1.897	83.8	54.9	1.73957	1.92324	57.1989	20	-77.1989	3.49845	0	0.06	5.2	0.21	1.66
959	Undecane	001120-21-4	PUFF	436.516	2.64	1.29141e+07	7.11107	0.03	1.11712	5.58819	13.0955	387424	3.02432	4.92132	95	368	(Kamprad and Goss, 2007)	Air (Log)	cm^3/g	CCCCCCCCCCC	156.31	3.843	5.74	1.897	1.897	83.8	54.9	1.73957	1.92324	57.1989	20	-77.1989	4.47107	0	0.06	5.2	0.21	1.66
337	Naphthalene	000091-20-3	PUFF	11749	4.07	6633.41	3.82174	0.03	2.54712	2.29886	352.469	199.002	3.75897	1.88397	65	338	(Kamprad and Goss, 2007)	Air (Log)	cm^3/g	C1=CC=C2C=CC=CC2=C1	128.18	5.045	3.17	-1.875	-1.745	5.38	39.9	1.60097	0.730782	58.418	20	-78.418	-0.248263	0	0.17	5.33	1.02	1.09
336	Naphthalene	000091-20-3	PUFF	2570.4	3.41	14116.1	4.14971	0.03	1.88712	2.62684	77.1119	423.483	3.83497	1.95997	95	368	(Kamprad and Goss, 2007)	Air (Log)	cm^3/g	C1=CC=C2C=CC=CC2=C1	128.18	5.045	3.17	-1.875	-1.745	5.38	39.9	1.60097	0.730782	58.418	20	-78.418	0.739714	0	0.17	5.33	1.02	1.09
839	n-Pentylbenzene	000538-68-1	PUFF	1047.13	3.02	159212	5.20198	0.03	1.49712	3.6791	31.4139	4776.36	3.39623	3.01223	95	368	(Kamprad and Goss, 2007)	Air (Log)	cm^3/g	CCCCCC1=CC=CC=C1	148.25	4.884	4.5	-0.384	0.016	36.7	58.5	1.76716	1.56467	56.9563	20	-76.9563	2.18198	0	0.13	5.41	0.65	1.42
912	1,2,3,4-Tetrachlorobenzene	000634-66-2	PUFF	7762.47	3.89	144877	5.161	0.03	2.36712	3.63812	232.874	4346.32	4.50926	2.97126	95	368	(Kamprad and Goss, 2007)	Air (Log)	cm^3/g	C1=CC(=C(C(=C1Cl)Cl)Cl)Cl	215.89	6.108	4.57	-1.538	-1.508	1.8	8.68	0.93852	0.255273	64.2449	20	-84.2449	1.271	0	0	5.44	1.02	1.21
575	Dodecane	000112-40-3	PUFF	14454.4	4.16	1.89497e+07	7.2776	0.03	2.63712	5.75472	433.632	568490	2.9869	5.6409	35	308	(Kamprad and Goss, 2007)	Air (Log)	cm^3/g	CCCCCCCCCCCC	170.34	3.576	6.23	2.654	2.524	31.5	18	1.25527	1.49831	61.4588	20	-81.4588	3.1176	0	0.06	5.7	0.22	1.8
574	Dodecane	000112-40-3	PUFF	2290.87	3.36	5.0561e+07	7.70382	0.03	1.83712	6.18094	68.726	1.51683e+06	3.11205	5.76605	65	338	(Kamprad and Goss, 2007)	Air (Log)	cm^3/g	CCCCCCCCCCCC	170.34	3.576	6.23	2.654	2.524	31.5	18	1.25527	1.49831	61.4588	20	-81.4588	4.34382	0	0.06	5.7	0.22	1.8
573	Dodecane	000112-40-3	PUFF	616.595	2.79	1.44578e+08	8.1601	0.03	1.26712	6.63722	18.4979	4.33734e+06	3.31636	5.97036	95	368	(Kamprad and Goss, 2007)	Air (Log)	cm^3/g	CCCCCCCCCCCC	170.34	3.576	6.23	2.654	2.524	31.5	18	1.25527	1.49831	61.4588	20	-81.4588	5.3701	0	0.06	5.7	0.22	1.8
332	1-Methylnaphthalene	000090-12-0	PUFF	5888.44	3.77	52702.3	4.72183	0.03	2.24712	3.19895	176.653	1581.07	4.35909	2.53209	95	368	(Kamprad and Goss, 2007)	Air (Log)	cm^3/g	CC1=CC=CC2=CC=CC=C12	142.2	5.547	3.72	-1.827	-1.677	4.91	11	1.04139	0.691081	63.34	20	-83.34	0.95183	0	0.17	5.8	0.96	1.23
958	n-Hexylbenzene	001077-16-3	PUFF	1949.84	3.29	370093	5.56831	0.03	1.76712	4.04543	58.4953	11102.8	3.83057	3.37857	95	368	(Kamprad and Goss, 2007)	Air (Log)	cm^3/g	CCCCCCC1=CC=CC=C1	162.28	5.452	5	-0.452	0.068	12.8	16.1	1.20683	1.10721	61.8849	20	-81.8849	2.27831	0	0.13	5.9	0.66	1.56
868	Pentachlorobenzene	000608-93-5	PUFF	16595.9	4.22	777566	5.89074	0.03	2.69712	4.36786	497.876	23327	5.19299	3.70099	95	368	(Kamprad and Goss, 2007)	Air (Log)	cm^3/g	C1=C(C(=C(C(=C1Cl)Cl)Cl)Cl)Cl	250.34	6.712	5.22	-1.492	-1.542	0.227	0.54	-0.267606	-0.643974	74.8538	20	-94.8538	1.67074	0	0	6	1.13	1.33
692	Dimethylphthalate	000131-11-3	PUFF	35481.3	4.55	517.019	2.71351	0.03	3.02712	1.19063	1064.44	15.5106	5.55776	0.523762	95	368	(Kamprad and Goss, 2007)	Air (Log)	cm^3/g	COC(=O)C1=CC=CC=C1C(=O)OC	194.19	6.694	1.66	-5.034	-5.094	0.616	0.411	-0.386158	-0.210419	75.8966	20	-95.8966	-1.83649	0	0.78	6.12	1.38	1.43
901	Tridecane	000629-50-5	PUFF	5011.87	3.7	3.3949e+07	7.53083	0.03	2.17712	6.00795	150.356	1.01847e+06	3.52206	5.59306	65	338	(Kamprad and Goss, 2007)	Air (Log)	cm^3/g	CCCCCCCCCCCCC	184.37	4.659	6.73	2.071	2.071	12.3	7.44	0.871573	1.08991	64.8338	20	-84.8338	3.83083	0	0.06	6.19	0.22	1.94
900	Tridecane	000629-50-5	PUFF	1096.48	3.04	8.70232e+07	7.93964	0.03	1.51712	6.41676	32.8943	2.6107e+06	3.67889	5.74989	95	368	(Kamprad and Goss, 2007)	Air (Log)	cm^3/g	CCCCCCCCCCCCC	184.37	4.659	6.73	2.071	2.071	12.3	7.44	0.871573	1.08991	64.8338	20	-84.8338	4.89964	0	0.06	6.19	0.22	1.94
360	Biphenyl	000092-52-4	PUFF	56234.1	4.75	26650.3	4.4257	0.03	3.22712	2.90282	1687.02	799.509	4.63794	2.48794	65	338	(Kamprad and Goss, 2007)	Air (Log)	cm^3/g	C1=CC=C(C=C1)C2=CC=CC=C2	154.21	5.91	3.76	-2.15	-1.9	0.999	3.24	0.510545	-0.000434512	68.0093	20	-88.0093	-0.324298	0	0.21	6.3	1.16	1.32
359	Biphenyl	000092-52-4	PUFF	11220.2	4.05	68315.4	4.83452	0.03	2.52712	3.31164	336.606	2049.46	4.79477	2.64477	95	368	(Kamprad and Goss, 2007)	Air (Log)	cm^3/g	C1=CC=C(C=C1)C2=CC=CC=C2	154.21	5.91	3.76	-2.15	-1.9	0.999	3.24	0.510545	-0.000434512	68.0093	20	-88.0093	0.784519	0	0.21	6.3	1.16	1.32
444	Azobenzene	000103-33-3	PUFF	56234.1	4.75	133696	5.12612	0.03	3.22712	3.60324	1687.02	4010.88	5.90437	2.93637	95	368	(Kamprad and Goss, 2007)	Air (Log)	cm^3/g	C1=CC=C(C=C1)N=NC2=CC=CC=C2	182.23	7.078	4.11	-2.968	-3.258	0.147	0.13	-0.886057	-0.832683	80.2936	20	-100.294	0.376118	0	0.41	6.31	0.86	1.48
591	Hexane	000118-74-1	PUFF	112.202	2.05	2.68102	0.428299	0.03	0.527121	-1.09458	3.36606	0.0804305	0.0551499	-0.97285	15	288	(Kamprad and Goss, 2007)	Air (Log)	cm^3/g	C1(=C(C(=C(C(=C1Cl)Cl)Cl)Cl)Cl)Cl	284.78	6.888	5.86	-1.028	-1.158	0.000407	0.267	-0.573489	-3.39041	77.5443	20	-97.5443	-1.6217	0	0	6.55	1.23	1.45
590	Hexane	000118-74-1	PUFF	69.1831	1.84	23.2889	1.36715	0.03	0.317121	-0.15573	2.07549	0.698667	0.758445	-0.269555	35	308	(Kamprad and Goss, 2007)	Air (Log)	cm^3/g	C1(=C(C(=C(C(=C1Cl)Cl)Cl)Cl)Cl)Cl	284.78	6.888	5.86	-1.028	-1.158	0.000407	0.267	-0.573489	-3.39041	77.5443	20	-97.5443	-0.472851	0	0	6.55	1.23	1.45
263	Acenaphthene	000083-32-9	PUFF	17782.8	4.25	251819	5.40109	0.03	2.72712	3.87821	533.484	7554.56	5.10534	3.21134	95	368	(Kamprad and Goss, 2007)	Air (Log)	cm^3/g	C1CC2=CC=CC3=C2C1=CC=C3	154.21	6.044	4.15	-1.894	-2.124	0.172	1.36	0.133539	-0.764472	71.3254	20	-91.3254	1.15109	0	0.15	6.56	0.99	1.26
904	Tetradecane	000629-59-4	PUFF	11481.5	4.06	3.46043e+08	8.53913	0.03	2.53712	7.01625	344.446	1.03813e+07	4.00636	6.60136	65	338	(Kamprad and Goss, 2007)	Air (Log)	cm^3/g	CCCCCCCCCCCCCC	198.4	4.625	7.22	2.595	2.575	4.92	1.55	0.190332	0.691965	70.8259	20	-90.8259	4.47913	0	0.07	6.69	0.23	2.08
903	Tetradecane	000629-59-4	PUFF	2238.72	3.35	9.40658e+08	8.97343	0.03	1.82712	7.45055	67.1616	2.82197e+07	4.18869	6.78369	95	368	(Kamprad and Goss, 2007)	Air (Log)	cm^3/g	CCCCCCCCCCCCCC	198.4	4.625	7.22	2.595	2.575	4.92	1.55	0.190332	0.691965	70.8259	20	-90.8259	5.62343	0	0.07	6.69	0.23	2.08
695	Dibenzofuran	000132-64-9	PUFF	30199.5	4.48	86699.7	4.93802	0.03	2.95712	3.41514	905.986	2600.99	5.52327	2.74827	95	368	(Kamprad and Goss, 2007)	Air (Log)	cm^3/g	C1=CC=C2C(=C1)C3=CC=CC=C3O2	168.2	6.825	4.05	-2.775	-2.775	0.111	0.311	-0.50724	-0.954677	76.9616	20	-96.9616	0.458018	0	0.27	6.78	1.22	1.27
101	Hexachlorobenzene	000058-89-9	PUFF	46773.5	4.67	42311.2	4.62646	0.03	3.14712	3.10358	1403.21	1269.34	5.99371	2.43671	95	368	(Kamprad and Goss, 2007)	Air (Log)	cm^3/g	C1(C(C(C(C(C1Cl)Cl)Cl)Cl)Cl)Cl	290.83	7.817	4.26	-3.557	-3.677	0.0674	0.0344	-1.46344	-1.17134	85.3722	20	-105.372	-0.0435442	0	0.4	7	1.1	1.58
1097	2,5-Dichlorobiphenyl	034883-39-1	PUFF	56234.1	4.75	785627	5.89522	0.03	3.22712	4.37234	1687.02	23568.8	5.69647	3.70547	95	368	(Kamprad and Goss, 2007)	Air (Log)	cm^3/g	C1=CC=C(C=C1)C2=C(C=CC(=C2)Cl)Cl	223.1	7.041	5.05	-1.991	-1.941	0.0254	0.665	-0.177178	-1.59517	74.0584	20	-94.0584	1.14522	0	0.2	7.47	1.35	1.57
1036	2,2' -Dichlorobiphenyl	013029-08-8	PUFF	46773.5	4.67	629954	5.79931	0.03	3.14712	4.27643	1403.21	18898.6	5.58656	3.60956	95	368	(Kamprad and Goss, 2007)	Air (Log)	cm^3/g	C1=CC=C(C(=C1)C2=CC=CC=C2Cl)Cl	223.1	7.027	5.05	-1.977	-2.027	0.0401	0.841	-0.075204	-1.39686	73.1615	20	-93.1615	1.12931	0	0.21	7.56	1.32	1.57
287	Phenanthrene	000085-01-8	PUFF	165959	5.22	552770	5.74254	0.03	3.69712	4.21967	4978.76	16583.1	6.4248	3.5528	95	368	(Kamprad and Goss, 2007)	Air (Log)	cm^3/g	C1=CC=C2C(=C1)C=CC3=CC=CC=C32	178.24	7.222	4.35	-2.872	-2.762	0.00576	0.0875	-1.05799	-2.23958	81.806	20	-101.806	0.522544	0	0.23	7.71	1.34	1.45
599	Anthracene	000120-12-7	PUFF	169824	5.23	827283	5.91765	0.03	3.70712	4.39478	5094.73	24818.5	6.47091	3.72791	95	368	(Kamprad and Goss, 2007)	Air (Log)	cm^3/g	C1=CC=C2C=C3C=CC=CC3=CC2=C1	178.24	7.093	4.35	-2.743	-2.643	0.000289	0.0659	-1.18111	-3.5391	82.8889	20	-102.889	0.687654	0	0.23	7.71	1.34	1.45
592	2,4,6-Trinitotoluene	000118-96-7	PUFF	2.45471e+06	6.39	32044.2	4.50575	0.03	4.86712	2.98287	73641.3	961.325	7.996	2.316	95	368	(Kamprad and Goss, 2007)	Air (Log)	cm^3/g	CC1=C(C=C(C=C1[N+](=O)[O-])[N+](=O)[O-])[N+](=O)[O-]	227.13	7.67	1.99	-5.68	-6.07	0.00229	0.00375	-2.42597	-2.64016	93.8385	20	-113.839	-1.88425	0	0.41	7.87	2.34	1.38
1045	2,4,5-Trichlorobiphenyl	015862-07-4	PUFF	147911	5.17	1.43897e+06	6.15805	0.03	3.64712	4.63517	4437.33	43169	6.17531	3.96831	95	368	(Kamprad and Goss, 2007)	Air (Log)	cm^3/g	C1=CC=C(C=C1)C2=CC(=C(C=C2Cl)Cl)Cl	257.55	7.897	5.69	-2.207	-2.087	0.00952	0.419	-0.377786	-2.02136	75.823	20	-95.823	0.988051	0	0.13	8.13	1.42	1.69
1233	Heptan-1-ol	053535-33-4	PUFF	1174.9	3.07	0.000389213	-3.40981	0.03	1.54712	-4.93269	35.2469	1.16764e-05	5.72044	-5.59956	95	368	(Kamprad and Goss, 2007)	Air (Log)	cm^3/g	C1=C(NC=N1)CC2C(=O)NC(=O)N2	180.17	10.37	-0.95	-11.32	-11.32	7.91e-09	1.03e-06	-5.98716	-8.10182	125.162	20	-145.162	-6.47981	0.79	1.44	9.35	1.98	1.22
527	phenol	000108-95-2	PDMS	19319.7	4.286	0.295121	-0.53	xxxxxxxxx	xxxxxxxxx	xxxxxxxxx	xxxxxxxxx	xxxxxxxxx	4.286	-0.53	25	298	(Kwon,Wuetrich,Mayer,Escher, 2007)	Water (Log)	dimensionless	C1=CC=C(C=C1)O	94.11	6.326	1.51	-4.816	-4.866	43	67.1	1.82672	1.63347	56.4324	20	-76.4324	-4.816	0.5	0.39	3.78	0.9	0.78
472	1,4-dichlorobenzene	000106-46-7	PDMS	11912.4	4.076	812.831	2.91	xxxxxxxxx	xxxxxxxxx	xxxxxxxxx	xxxxxxxxx	xxxxxxxxx	4.076	2.91	25	298	(Kwon,Wuetrich,Mayer,Escher, 2007)	Water (Log)	dimensionless	C1=CC(=CC=C1Cl)Cl	147	4.446	3.28	-1.166	-1.006	88	429	2.63246	1.94448	49.3452	20	-69.3452	-1.166	0	0.1	4.13	0.88	0.96
473	1,4-dichlorobenzene	000106-46-7	PDMS	13061.7	4.116	891.251	2.95	xxxxxxxxx	xxxxxxxxx	xxxxxxxxx	xxxxxxxxx	xxxxxxxxx	4.116	2.95	25	298	(Kwon,Wuetrich,Mayer,Escher, 2007)	Water (Log)	dimensionless	C1=CC(=CC=C1Cl)Cl	147	4.446	3.28	-1.166	-1.006	88	429	2.63246	1.94448	49.3452	20	-69.3452	-1.166	0	0.1	4.13	0.88	0.96
125	aniline	000062-53-3	PDMS	8184.65	3.913	1.02329	0.01	xxxxxxxxx	xxxxxxxxx	xxxxxxxxx	xxxxxxxxx	xxxxxxxxx	3.913	0.01	25	298	(Kwon,Wuetrich,Mayer,Escher, 2007)	Water (Log)	dimensionless	C1=CC=C(C=C1)N	93.13	4.983	1.08	-3.903	-4.083	105	65.3	1.81491	2.02119	56.5363	20	-76.5363	-3.903	0.23	0.43	4.14	1.08	0.82
378	1,2-dichlorobenzene	000095-50-1	PDMS	11614.5	4.065	645.654	2.81	xxxxxxxxx	xxxxxxxxx	xxxxxxxxx	xxxxxxxxx	xxxxxxxxx	4.065	2.81	25	298	(Kwon,Wuetrich,Mayer,Escher, 2007)	Water (Log)	dimensionless	C1=CC=C(C(=C1)Cl)Cl	147	4.535	3.28	-1.255	-1.105	129	196	2.29226	2.11059	52.3376	20	-72.3376	-1.255	0	0.1	4.33	0.85	0.96
377	1,2-dichlorobenzene	000095-50-1	PDMS	14962.4	4.175	831.764	2.92	xxxxxxxxx	xxxxxxxxx	xxxxxxxxx	xxxxxxxxx	xxxxxxxxx	4.175	2.92	25	298	(Kwon,Wuetrich,Mayer,Escher, 2007)	Water (Log)	dimensionless	C1=CC=C(C(=C1)Cl)Cl	147	4.535	3.28	-1.255	-1.105	129	196	2.29226	2.11059	52.3376	20	-72.3376	-1.255	0	0.1	4.33	0.85	0.96
387	2-chlorophenol	000095-57-8	PDMS	7744.62	3.889	3.63078	0.56	xxxxxxxxx	xxxxxxxxx	xxxxxxxxx	xxxxxxxxx	xxxxxxxxx	3.889	0.56	25	298	(Kwon,Wuetrich,Mayer,Escher, 2007)	Water (Log)	dimensionless	C1=CC=C(C(=C1)O)Cl	128.56	5.489	2.16	-3.329	-3.339	95.5	337	2.52763	1.98	50.2673	20	-70.2673	-3.329	0.33	0.3	4.48	0.84	0.9
494	3-chloroaniline	000108-42-9	PDMS	238781	5.378	6.76083	0.83	xxxxxxxxx	xxxxxxxxx	xxxxxxxxx	xxxxxxxxx	xxxxxxxxx	5.378	0.83	25	298	(Kwon,Wuetrich,Mayer,Escher, 2007)	Water (Log)	dimensionless	C1=CC(=CC(=C1)Cl)N	127.57	6.268	1.72	-4.548	-4.388	10.2	8.8	0.944483	1.0086	64.1924	20	-84.1924	-4.548	0.3	0.37	4.67	1.15	0.94
500	1,3,5-trichlorobenzene	000108-70-3	PDMS	53951.1	4.732	2290.87	3.36	xxxxxxxxx	xxxxxxxxx	xxxxxxxxx	xxxxxxxxx	xxxxxxxxx	4.732	3.36	25	298	(Kwon,Wuetrich,Mayer,Escher, 2007)	Water (Log)	dimensionless	C1=C(C=C(C=C1Cl)Cl)Cl	181.45	5.302	3.93	-1.372	-1.112	12.9	147	2.16732	1.11059	53.4365	20	-73.4365	-1.372	0	0.02	4.71	0.91	1.08
501	1,3,5-trichlorobenzene	000108-70-3	PDMS	95940.1	4.982	4073.8	3.61	xxxxxxxxx	xxxxxxxxx	xxxxxxxxx	xxxxxxxxx	xxxxxxxxx	4.982	3.61	25	298	(Kwon,Wuetrich,Mayer,Escher, 2007)	Water (Log)	dimensionless	C1=C(C=C(C=C1Cl)Cl)Cl	181.45	5.302	3.93	-1.372	-1.112	12.9	147	2.16732	1.11059	53.4365	20	-73.4365	-1.372	0	0.02	4.71	0.91	1.08
502	1,3,5-trichlorobenzene	000108-70-3	PDMS	110154	5.042	4677.35	3.67	xxxxxxxxx	xxxxxxxxx	xxxxxxxxx	xxxxxxxxx	xxxxxxxxx	5.042	3.67	25	298	(Kwon,Wuetrich,Mayer,Escher, 2007)	Water (Log)	dimensionless	C1=C(C=C(C=C1Cl)Cl)Cl	181.45	5.302	3.93	-1.372	-1.112	12.9	147	2.16732	1.11059	53.4365	20	-73.4365	-1.372	0	0.02	4.71	0.91	1.08
616	1,2,4-trichlorobenzene	000120-82-1	PDMS	45289.8	4.656	2137.96	3.33	xxxxxxxxx	xxxxxxxxx	xxxxxxxxx	xxxxxxxxx	xxxxxxxxx	4.656	3.33	25	298	(Kwon,Wuetrich,Mayer,Escher, 2007)	Water (Log)	dimensionless	C1=CC(=C(C=C1Cl)Cl)Cl	181.45	5.256	3.93	-1.326	-1.236	24.4	61.3	1.78746	1.38739	56.7777	20	-76.7777	-1.326	0	0.03	4.78	0.95	1.08
617	1,2,4-trichlorobenzene	000120-82-1	PDMS	61094.2	4.786	2884.03	3.46	xxxxxxxxx	xxxxxxxxx	xxxxxxxxx	xxxxxxxxx	xxxxxxxxx	4.786	3.46	25	298	(Kwon,Wuetrich,Mayer,Escher, 2007)	Water (Log)	dimensionless	C1=CC(=C(C=C1Cl)Cl)Cl	181.45	5.256	3.93	-1.326	-1.236	24.4	61.3	1.78746	1.38739	56.7777	20	-76.7777	-1.326	0	0.03	4.78	0.95	1.08
618	1,2,4-trichlorobenzene	000120-82-1	PDMS	68548.8	4.836	3235.94	3.51	xxxxxxxxx	xxxxxxxxx	xxxxxxxxx	xxxxxxxxx	xxxxxxxxx	4.836	3.51	25	298	(Kwon,Wuetrich,Mayer,Escher, 2007)	Water (Log)	dimensionless	C1=CC(=C(C=C1Cl)Cl)Cl	181.45	5.256	3.93	-1.326	-1.236	24.4	61.3	1.78746	1.38739	56.7777	20	-76.7777	-1.326	0	0.03	4.78	0.95	1.08
383	2-chloroaniline	000095-51-2	PDMS	75335.6	4.877	10.9648	1.04	xxxxxxxxx	xxxxxxxxx	xxxxxxxxx	xxxxxxxxx	xxxxxxxxx	4.877	1.04	25	298	(Kwon,Wuetrich,Mayer,Escher, 2007)	Water (Log)	dimensionless	C1=CC=C(C(=C1)N)Cl	127.57	5.557	1.72	-3.837	-3.657	30.9	27.2	1.43457	1.48996	59.8817	20	-79.8817	-3.837	0.23	0.42	4.88	1.16	0.94
319	1,2,3-trichlorobenzene	000087-61-6	PDMS	55207.7	4.742	2137.96	3.33	xxxxxxxxx	xxxxxxxxx	xxxxxxxxx	xxxxxxxxx	xxxxxxxxx	4.742	3.33	25	298	(Kwon,Wuetrich,Mayer,Escher, 2007)	Water (Log)	dimensionless	C1=CC(=C(C(=C1)Cl)Cl)Cl	181.45	5.342	3.93	-1.412	-1.292	9.58	53.6	1.72916	0.981366	57.2905	20	-77.2905	-1.412	0	0.04	4.93	0.92	1.08
320	1,2,3-trichlorobenzene	000087-61-6	PDMS	67920.4	4.832	2630.27	3.42	xxxxxxxxx	xxxxxxxxx	xxxxxxxxx	xxxxxxxxx	xxxxxxxxx	4.832	3.42	25	298	(Kwon,Wuetrich,Mayer,Escher, 2007)	Water (Log)	dimensionless	C1=CC(=C(C(=C1)Cl)Cl)Cl	181.45	5.342	3.93	-1.412	-1.292	9.58	53.6	1.72916	0.981366	57.2905	20	-77.2905	-1.412	0	0.04	4.93	0.92	1.08
321	1,2,3-trichlorobenzene	000087-61-6	PDMS	74473.2	4.872	2884.03	3.46	xxxxxxxxx	xxxxxxxxx	xxxxxxxxx	xxxxxxxxx	xxxxxxxxx	4.872	3.46	25	298	(Kwon,Wuetrich,Mayer,Escher, 2007)	Water (Log)	dimensionless	C1=CC(=C(C(=C1)Cl)Cl)Cl	181.45	5.342	3.93	-1.412	-1.292	9.58	53.6	1.72916	0.981366	57.2905	20	-77.2905	-1.412	0	0.04	4.93	0.92	1.08
390	3,4-dimethylaniline	000095-64-7	PDMS	72277	4.859	11.749	1.07	xxxxxxxxx	xxxxxxxxx	xxxxxxxxx	xxxxxxxxx	xxxxxxxxx	4.859	1.07	25	298	(Kwon,Wuetrich,Mayer,Escher, 2007)	Water (Log)	dimensionless	CC1=C(C=C(C=C1)N)C	121.18	5.959	2.17	-3.789	-4.119	6.27	6.72	0.827369	0.797268	65.2226	20	-85.2226	-3.789	0.23	0.43	5.08	0.97	1.1
1017	2,4,5-trichlorotoluene	006639-30-1	PDMS	264241	5.422	13182.6	4.12	xxxxxxxxx	xxxxxxxxx	xxxxxxxxx	xxxxxxxxx	xxxxxxxxx	5.422	4.12	25	298	(Kwon,Wuetrich,Mayer,Escher, 2007)	Water (Log)	dimensionless	CC1=CC(=C(C=C1Cl)Cl)Cl	195.48	5.772	4.47	-1.302	-1.212	2.64	9.35	0.970812	0.421604	63.9609	20	-83.9609	-1.302	0	0.03	5.26	0.89	1.22
1018	2,4,5-trichlorotoluene	006639-30-1	PDMS	325087	5.512	16218.1	4.21	xxxxxxxxx	xxxxxxxxx	xxxxxxxxx	xxxxxxxxx	xxxxxxxxx	5.512	4.21	25	298	(Kwon,Wuetrich,Mayer,Escher, 2007)	Water (Log)	dimensionless	CC1=CC(=C(C=C1Cl)Cl)Cl	195.48	5.772	4.47	-1.302	-1.212	2.64	9.35	0.970812	0.421604	63.9609	20	-83.9609	-1.302	0	0.03	5.26	0.89	1.22
391	3,4-dichloroaniline	000095-76-1	PDMS	85901.4	4.934	24.5471	1.39	xxxxxxxxx	xxxxxxxxx	xxxxxxxxx	xxxxxxxxx	xxxxxxxxx	4.934	1.39	25	298	(Kwon,Wuetrich,Mayer,Escher, 2007)	Water (Log)	dimensionless	C1=CC(=C(C=C1N)Cl)Cl	162.02	5.914	2.37	-3.544	-3.224	0.409	2.45	0.389166	-0.388277	69.0769	20	-89.0769	-3.544	0.35	0.35	5.33	1.26	1.06
846	2,4-dichloroaniline	000554-00-7	PDMS	2.93089e+06	6.467	48.9779	1.69	xxxxxxxxx	xxxxxxxxx	xxxxxxxxx	xxxxxxxxx	xxxxxxxxx	6.467	1.69	25	298	(Kwon,Wuetrich,Mayer,Escher, 2007)	Water (Log)	dimensionless	C1=CC(=C(C=C1Cl)Cl)N	162.02	7.147	2.37	-4.777	-4.367	2	4.59	0.661813	0.30103	66.6788	20	-86.6788	-4.777	0.28	0.35	5.33	1.26	1.06
353	napthalene	000091-20-3	PDMS	42169.7	4.625	562.341	2.75	xxxxxxxxx	xxxxxxxxx	xxxxxxxxx	xxxxxxxxx	xxxxxxxxx	4.625	2.75	25	298	(Kwon,Wuetrich,Mayer,Escher, 2007)	Water (Log)	dimensionless	C1=CC=C2C=CC=CC2=C1	128.18	5.045	3.17	-1.875	-1.745	5.38	39.9	1.60097	0.730782	58.418	20	-78.418	-1.875	0	0.17	5.33	1.02	1.09
354	napthalene	000091-20-3	PDMS	53088.4	4.725	707.946	2.85	xxxxxxxxx	xxxxxxxxx	xxxxxxxxx	xxxxxxxxx	xxxxxxxxx	4.725	2.85	25	298	(Kwon,Wuetrich,Mayer,Escher, 2007)	Water (Log)	dimensionless	C1=CC=C2C=CC=CC2=C1	128.18	5.045	3.17	-1.875	-1.745	5.38	39.9	1.60097	0.730782	58.418	20	-78.418	-1.875	0	0.17	5.33	1.02	1.09
395	1,2,4,5-tetrachlorobenzene	000095-94-3	PDMS	307610	5.488	10715.2	4.03	xxxxxxxxx	xxxxxxxxx	xxxxxxxxx	xxxxxxxxx	xxxxxxxxx	5.488	4.03	25	298	(Kwon,Wuetrich,Mayer,Escher, 2007)	Water (Log)	dimensionless	C1=C(C(=CC(=C1Cl)Cl)Cl)Cl	215.89	6.028	4.57	-1.458	-1.388	0.329	9.77	0.989895	-0.482804	63.793	20	-83.793	-1.458	0	0	5.35	1.05	1.21
394	1,2,4,5-tetrachlorobenzene	000095-94-3	PDMS	396278	5.598	13803.8	4.14	xxxxxxxxx	xxxxxxxxx	xxxxxxxxx	xxxxxxxxx	xxxxxxxxx	5.598	4.14	25	298	(Kwon,Wuetrich,Mayer,Escher, 2007)	Water (Log)	dimensionless	C1=C(C(=CC(=C1Cl)Cl)Cl)Cl	215.89	6.028	4.57	-1.458	-1.388	0.329	9.77	0.989895	-0.482804	63.793	20	-83.793	-1.458	0	0	5.35	1.05	1.21
915	1,2,3,5-tetrachlorobenzene	000634-90-2	PDMS	199526	5.3	13182.6	4.12	xxxxxxxxx	xxxxxxxxx	xxxxxxxxx	xxxxxxxxx	xxxxxxxxx	5.3	4.12	25	298	(Kwon,Wuetrich,Mayer,Escher, 2007)	Water (Log)	dimensionless	C1=C(C=C(C(=C1Cl)Cl)Cl)Cl	215.89	5.75	4.57	-1.18	-1.19	3.54	21.2	1.32634	0.549003	60.8337	20	-80.8337	-1.18	0	0	5.43	1.03	1.21
914	1,2,3,5-tetrachlorobenzene	000634-90-2	PDMS	263027	5.42	17378	4.24	xxxxxxxxx	xxxxxxxxx	xxxxxxxxx	xxxxxxxxx	xxxxxxxxx	5.42	4.24	25	298	(Kwon,Wuetrich,Mayer,Escher, 2007)	Water (Log)	dimensionless	C1=C(C=C(C(=C1Cl)Cl)Cl)Cl	215.89	5.75	4.57	-1.18	-1.19	3.54	21.2	1.32634	0.549003	60.8337	20	-80.8337	-1.18	0	0	5.43	1.03	1.21
328	2,4,6-trichlorophenol	000088-06-2	PDMS	877001	5.943	53.7032	1.73	xxxxxxxxx	xxxxxxxxx	xxxxxxxxx	xxxxxxxxx	xxxxxxxxx	5.943	1.73	25	298	(Kwon,Wuetrich,Mayer,Escher, 2007)	Water (Log)	dimensionless	C1=C(C=C(C(=C1Cl)O)Cl)Cl	197.45	7.663	3.45	-4.213	-3.973	0.715	2.91	0.463893	-0.145694	68.4197	20	-88.4197	-4.213	0.42	0.15	5.55	0.94	1.14
872	pentachlorobenzene	000608-93-5	PDMS	1.1272e+06	6.052	36307.8	4.56	xxxxxxxxx	xxxxxxxxx	xxxxxxxxx	xxxxxxxxx	xxxxxxxxx	6.052	4.56	25	298	(Kwon,Wuetrich,Mayer,Escher, 2007)	Water (Log)	dimensionless	C1=C(C(=C(C(=C1Cl)Cl)Cl)Cl)Cl	250.34	6.712	5.22	-1.492	-1.542	0.227	0.54	-0.267606	-0.643974	74.8538	20	-94.8538	-1.492	0	0	6	1.13	1.33
871	pentachlorobenzene	000608-93-5	PDMS	1.52055e+06	6.182	48977.9	4.69	xxxxxxxxx	xxxxxxxxx	xxxxxxxxx	xxxxxxxxx	xxxxxxxxx	6.182	4.69	25	298	(Kwon,Wuetrich,Mayer,Escher, 2007)	Water (Log)	dimensionless	C1=C(C(=C(C(=C1Cl)Cl)Cl)Cl)Cl	250.34	6.712	5.22	-1.492	-1.542	0.227	0.54	-0.267606	-0.643974	74.8538	20	-94.8538	-1.492	0	0	6	1.13	1.33
587	aldicarb	000116-06-3	PDMS	2.23872e+07	7.35	2.23872	0.35	xxxxxxxxx	xxxxxxxxx	xxxxxxxxx	xxxxxxxxx	xxxxxxxxx	7.35	0.35	25	298	(Kwon,Wuetrich,Mayer,Escher, 2007)	Water (Log)	dimensionless	CC(C)(C=NOC(=O)NC)SC	190.26	8.36	1.36	-7	-7.23	0.644	0.0249	-1.6038	-0.191114	86.6068	20	-106.607	-7	0.21	0.87	6.12	0.91	1.49
269	acenaphthene	000083-32-9	PDMS	225944	5.354	2884.03	3.46	xxxxxxxxx	xxxxxxxxx	xxxxxxxxx	xxxxxxxxx	xxxxxxxxx	5.354	3.46	25	298	(Kwon,Wuetrich,Mayer,Escher, 2007)	Water (Log)	dimensionless	C1CC2=CC=CC3=C2C1=CC=C3	154.21	6.044	4.15	-1.894	-2.124	0.172	1.36	0.133539	-0.764472	71.3254	20	-91.3254	-1.894	0	0.15	6.56	0.99	1.26
1003	2,3,5,6-tetrachloroaniline	003481-20-7	PDMS	2.13796e+08	8.33	1778.28	3.25	xxxxxxxxx	xxxxxxxxx	xxxxxxxxx	xxxxxxxxx	xxxxxxxxx	8.33	3.25	25	298	(Kwon,Wuetrich,Mayer,Escher, 2007)	Water (Log)	dimensionless	C1=C(C(=C(C(=C1Cl)Cl)N)Cl)Cl	230.91	8.73	3.65	-5.08	-4.63	0.0463	0.287	-0.542118	-1.33442	77.2684	20	-97.2684	-5.08	0.33	0.17	6.57	1.42	1.31
327	pentachlorophenol	000087-86-5	PDMS	1.06905e+09	9.029	446.684	2.65	xxxxxxxxx	xxxxxxxxx	xxxxxxxxx	xxxxxxxxx	xxxxxxxxx	9.029	2.65	25	298	(Kwon,Wuetrich,Mayer,Escher, 2007)	Water (Log)	dimensionless	C1(=C(C(=C(C(=C1Cl)Cl)Cl)Cl)Cl)O	266.34	11.119	4.74	-6.379	-5.999	0.00144	0.436	-0.360514	-2.84164	75.671	20	-95.671	-6.379	0.7	0	6.71	1.13	1.39
838	4,6-dinitro-0-toluene	000534-52-1	PDMS	214783	5.332	16.9824	1.23	xxxxxxxxx	xxxxxxxxx	xxxxxxxxx	xxxxxxxxx	xxxxxxxxx	5.332	1.23	25	298	(Kwon,Wuetrich,Mayer,Escher, 2007)	Water (Log)	dimensionless	CC1=CC(=CC(=C1O)[N+](=O)[O-])[N+](=O)[O-]	198.14	6.372	2.27	-4.102	-4.242	0.000226	0.0651	-1.18642	-3.64589	82.9356	20	-102.936	-4.102	0.28	0.45	6.72	1.75	1.26
100	Hexachlorobenzene	000058-89-9	PDMS	2.93089e+08	8.467	81283.1	4.91	xxxxxxxxx	xxxxxxxxx	xxxxxxxxx	xxxxxxxxx	xxxxxxxxx	8.467	4.91	25	298	(Kwon,Wuetrich,Mayer,Escher, 2007)	Water (Log)	dimensionless	C1(C(C(C(C(C1Cl)Cl)Cl)Cl)Cl)Cl	290.83	7.817	4.26	-3.557	-3.677	0.0674	0.0344	-1.46344	-1.17134	85.3722	20	-105.372	-3.557	0	0.4	7	1.1	1.58
99	Hexachlorobenzene	000058-89-9	PDMS	4.75335e+08	8.677	131826	5.12	xxxxxxxxx	xxxxxxxxx	xxxxxxxxx	xxxxxxxxx	xxxxxxxxx	8.677	5.12	25	298	(Kwon,Wuetrich,Mayer,Escher, 2007)	Water (Log)	dimensionless	C1(C(C(C(C(C1Cl)Cl)Cl)Cl)Cl)Cl	290.83	7.817	4.26	-3.557	-3.677	0.0674	0.0344	-1.46344	-1.17134	85.3722	20	-105.372	-3.557	0	0.4	7	1.1	1.58
297	Phenanthrene	000085-01-8	PDMS	4.09261e+06	6.612	5495.41	3.74	xxxxxxxxx	xxxxxxxxx	xxxxxxxxx	xxxxxxxxx	xxxxxxxxx	6.612	3.74	25	298	(Kwon,Wuetrich,Mayer,Escher, 2007)	Water (Log)	dimensionless	C1=CC=C2C(=C1)C=CC3=CC=CC=C32	178.24	7.222	4.35	-2.872	-2.762	0.00576	0.0875	-1.05799	-2.23958	81.806	20	-101.806	-2.872	0	0.23	7.71	1.34	1.45
298	Phenanthrene	000085-01-8	PDMS	5.52077e+06	6.742	7413.1	3.87	xxxxxxxxx	xxxxxxxxx	xxxxxxxxx	xxxxxxxxx	xxxxxxxxx	6.742	3.87	25	298	(Kwon,Wuetrich,Mayer,Escher, 2007)	Water (Log)	dimensionless	C1=CC=C2C(=C1)C=CC3=CC=CC=C32	178.24	7.222	4.35	-2.872	-2.762	0.00576	0.0875	-1.05799	-2.23958	81.806	20	-101.806	-2.872	0	0.23	7.71	1.34	1.45
607	Anthracene	000120-12-7	PDMS	4.70977e+06	6.673	8511.38	3.93	xxxxxxxxx	xxxxxxxxx	xxxxxxxxx	xxxxxxxxx	xxxxxxxxx	6.673	3.93	25	298	(Kwon,Wuetrich,Mayer,Escher, 2007)	Water (Log)	dimensionless	C1=CC=C2C=C3C=CC=CC3=CC2=C1	178.24	7.093	4.35	-2.743	-2.643	0.000289	0.0659	-1.18111	-3.5391	82.8889	20	-102.889	-2.743	0	0.23	7.71	1.34	1.45
608	Anthracene	000120-12-7	PDMS	5.28445e+06	6.723	9549.93	3.98	xxxxxxxxx	xxxxxxxxx	xxxxxxxxx	xxxxxxxxx	xxxxxxxxx	6.723	3.98	25	298	(Kwon,Wuetrich,Mayer,Escher, 2007)	Water (Log)	dimensionless	C1=CC=C2C=C3C=CC=CC3=CC2=C1	178.24	7.093	4.35	-2.743	-2.643	0.000289	0.0659	-1.18111	-3.5391	82.8889	20	-102.889	-2.743	0	0.23	7.71	1.34	1.45
132	carbaryl	000063-25-2	PDMS	9.4189e+07	7.974	12.3027	1.09	xxxxxxxxx	xxxxxxxxx	xxxxxxxxx	xxxxxxxxx	xxxxxxxxx	7.974	1.09	25	298	(Kwon,Wuetrich,Mayer,Escher, 2007)	Water (Log)	dimensionless	CNC(=O)OC1=CC=CC2=CC=CC=C21	201.23	9.234	2.35	-6.884	-6.874	0.00711	0.00279	-2.5544	-2.14813	94.9681	20	-114.968	-6.884	0.21	0.7	8.2	1.66	1.54
968	carbofuran	001563-66-2	PDMS	4.87528e+07	7.688	5.88844	0.77	xxxxxxxxx	xxxxxxxxx	xxxxxxxxx	xxxxxxxxx	xxxxxxxxx	7.688	0.77	25	298	(Kwon,Wuetrich,Mayer,Escher, 2007)	Water (Log)	dimensionless	CC1(CC2=C(O1)C(=CC=C2)OC(=O)NC)C	221.26	9.218	2.3	-6.918	-6.898	0.00738	0.141	-0.850781	-2.13194	79.9834	20	-99.9834	-6.918	0.21	0.87	8.21	1.41	1.69
818	diuron	000330-54-1	PDMS	6.25173e+08	8.796	12.5893	1.1	xxxxxxxxx	xxxxxxxxx	xxxxxxxxx	xxxxxxxxx	xxxxxxxxx	8.796	1.1	25	298	(Kwon,Wuetrich,Mayer,Escher, 2007)	Water (Log)	dimensionless	CN(C)C(=O)NC1=CC(=C(C=C1)Cl)Cl	233.1	10.366	2.67	-7.696	-7.686	0.00062	0.000191	-3.71897	-3.20761	105.212	20	-125.212	-7.696	0.44	0.77	8.35	1.66	1.6
934	terbutryn	000886-50-0	PDMS	4.85289e+08	8.686	457.088	2.66	xxxxxxxxx	xxxxxxxxx	xxxxxxxxx	xxxxxxxxx	xxxxxxxxx	8.686	2.66	25	298	(Kwon,Wuetrich,Mayer,Escher, 2007)	Water (Log)	dimensionless	CCNC1=NC(=NC(=N1)SC)NC(C)(C)C	241.36	9.796	3.77	-6.026	-6.056	0.00313	0.00136	-2.86646	-2.50446	97.713	20	-117.713	-6.026	0.26	1.08	9	1.22	1.94
757	fluoranthene	000206-44-0	PDMS	7.60326e+07	7.881	16218.1	4.21	xxxxxxxxx	xxxxxxxxx	xxxxxxxxx	xxxxxxxxx	xxxxxxxxx	7.881	4.21	25	298	(Kwon,Wuetrich,Mayer,Escher, 2007)	Water (Log)	dimensionless	C1=CC=C2C(=C1)C3=CC=CC4=C3C2=CC=C4	202.26	8.601	4.93	-3.671	-3.441	0.000417	0.00811	-2.09098	-3.37986	90.892	20	-110.892	-3.671	0	0.25	9.11	1.52	1.58
682	Pyrene	000129-00-0	PDMS	3.41193e+07	7.533	18620.9	4.27	xxxxxxxxx	xxxxxxxxx	xxxxxxxxx	xxxxxxxxx	xxxxxxxxx	7.533	4.27	25	298	(Kwon,Wuetrich,Mayer,Escher, 2007)	Water (Log)	dimensionless	C1=CC2=C3C(=C1)C=CC4=CC=CC(=C43)C=C2	202.26	8.193	4.93	-3.263	-3.313	4.59e-05	0.0106	-1.97469	-4.33819	89.8692	20	-109.869	-3.263	0	0.25	9.11	1.52	1.58
758	fluoranthene	000206-44-0	PDMS	9.7949e+07	7.991	20893	4.32	xxxxxxxxx	xxxxxxxxx	xxxxxxxxx	xxxxxxxxx	xxxxxxxxx	7.991	4.32	25	298	(Kwon,Wuetrich,Mayer,Escher, 2007)	Water (Log)	dimensionless	C1=CC=C2C(=C1)C3=CC=CC4=C3C2=CC=C4	202.26	8.601	4.93	-3.671	-3.441	0.000417	0.00811	-2.09098	-3.37986	90.892	20	-110.892	-3.671	0	0.25	9.11	1.52	1.58
683	Pyrene	000129-00-0	PDMS	4.19759e+07	7.623	22908.7	4.36	xxxxxxxxx	xxxxxxxxx	xxxxxxxxx	xxxxxxxxx	xxxxxxxxx	7.623	4.36	25	298	(Kwon,Wuetrich,Mayer,Escher, 2007)	Water (Log)	dimensionless	C1=CC2=C3C(=C1)C=CC4=CC=CC(=C43)C=C2	202.26	8.193	4.93	-3.263	-3.313	4.59e-05	0.0106	-1.97469	-4.33819	89.8692	20	-109.869	-3.263	0	0.25	9.11	1.52	1.58
785	Chrysene	000218-01-9	PDMS	5.01187e+08	8.7	54954.1	4.74	xxxxxxxxx	xxxxxxxxx	xxxxxxxxx	xxxxxxxxx	xxxxxxxxx	8.7	4.74	25	298	(Kwon,Wuetrich,Mayer,Escher, 2007)	Water (Log)	dimensionless	C1=CC=C2C(=C1)C=CC3=C2C=CC4=CC=CC=C43	228.3	9.48	5.52	-3.96	-3.67	2.08e-07	0.000168	-3.77469	-6.68194	105.702	20	-125.702	-3.96	0	0.29	10.08	1.66	1.82
784	Chrysene	000218-01-9	PDMS	5.88844e+08	8.77	64565.4	4.81	xxxxxxxxx	xxxxxxxxx	xxxxxxxxx	xxxxxxxxx	xxxxxxxxx	8.77	4.81	25	298	(Kwon,Wuetrich,Mayer,Escher, 2007)	Water (Log)	dimensionless	C1=CC=C2C(=C1)C=CC3=C2C=CC4=CC=CC=C43	228.3	9.48	5.52	-3.96	-3.67	2.08e-07	0.000168	-3.77469	-6.68194	105.702	20	-125.702	-3.96	0	0.29	10.08	1.66	1.82
63	Benz[a]anthracene	000056-55-3	PDMS	2.50611e+08	8.399	70794.6	4.85	xxxxxxxxx	xxxxxxxxx	xxxxxxxxx	xxxxxxxxx	xxxxxxxxx	8.399	4.85	25	298	(Kwon,Wuetrich,Mayer,Escher, 2007)	Water (Log)	dimensionless	C1=CC=C2C(=C1)C=CC3=CC4=CC=CC=C4C=C32	228.3	9.069	5.52	-3.549	-3.309	3.62e-05	0.000107	-3.97062	-4.44129	107.425	20	-127.425	-3.549	0	0.29	10.08	1.66	1.82
62	Benz[a]anthracene	000056-55-3	PDMS	2.8119e+08	8.449	79432.8	4.9	xxxxxxxxx	xxxxxxxxx	xxxxxxxxx	xxxxxxxxx	xxxxxxxxx	8.449	4.9	25	298	(Kwon,Wuetrich,Mayer,Escher, 2007)	Water (Log)	dimensionless	C1=CC=C2C(=C1)C=CC3=CC4=CC=CC=C4C=C32	228.3	9.069	5.52	-3.549	-3.309	3.62e-05	0.000107	-3.97062	-4.44129	107.425	20	-127.425	-3.549	0	0.29	10.08	1.66	1.82
738	perylene	000198-55-0	PDMS	8.8308e+08	8.946	95499.3	4.98	xxxxxxxxx	xxxxxxxxx	xxxxxxxxx	xxxxxxxxx	xxxxxxxxx	8.946	4.98	25	298	(Kwon,Wuetrich,Mayer,Escher, 2007)	Water (Log)	dimensionless	C1=CC2=C3C(=C1)C4=CC=CC5=C4C(=CC=C5)C3=CC=C2	252.32	10.076	6.11	-3.966	-3.826	1.79e-07	0.000203	-3.6925	-6.74715	104.979	20	-124.979	-3.966	0	0.31	11.48	1.84	1.95
28	Benzo[a]pyrene	000050-32-8	PDMS	6.9024e+09	9.839	123027	5.09	xxxxxxxxx	xxxxxxxxx	xxxxxxxxx	xxxxxxxxx	xxxxxxxxx	9.839	5.09	25	298	(Kwon,Wuetrich,Mayer,Escher, 2007)	Water (Log)	dimensionless	C1=CC=C2C3=C4C(=CC2=C1)C=CC5=C4C(=CC=C5)C=C3	252.32	10.859	6.11	-4.749	-4.729	1.31e-07	2.31e-05	-4.63639	-6.88273	113.281	20	-133.281	-4.749	0	0.31	11.48	1.84	1.95
29	Benzo[a]pyrene	000050-32-8	PDMS	1.28529e+10	10.109	229087	5.36	xxxxxxxxx	xxxxxxxxx	xxxxxxxxx	xxxxxxxxx	xxxxxxxxx	10.109	5.36	25	298	(Kwon,Wuetrich,Mayer,Escher, 2007)	Water (Log)	dimensionless	C1=CC=C2C3=C4C(=CC2=C1)C=CC5=C4C(=CC=C5)C=C3	252.32	10.859	6.11	-4.749	-4.729	1.31e-07	2.31e-05	-4.63639	-6.88273	113.281	20	-133.281	-4.749	0	0.31	11.48	1.84	1.95
777	Dibenz[ac]anthracene	000215-58-7	PDMS	6.59174e+09	9.819	257040	5.41	xxxxxxxxx	xxxxxxxxx	xxxxxxxxx	xxxxxxxxx	xxxxxxxxx	9.819	5.41	25	298	(Kwon,Wuetrich,Mayer,Escher, 2007)	Water (Log)	dimensionless	C1=CC=C2C=C3C4=CC=CC=C4C5=CC=CC=C5C3=CC2=C1	278.36	11.109	6.7	-4.409	-4.699	1.09e-08	8.23e-07	-6.0846	-7.96257	126.019	20	-146.019	-4.409	0	0.35	12.45	1.99	2.19
43	Dibenz[ah]anthracene	000053-70-3	PDMS	3.53997e+10	10.549	295121	5.47	xxxxxxxxx	xxxxxxxxx	xxxxxxxxx	xxxxxxxxx	xxxxxxxxx	10.549	5.47	25	298	(Kwon,Wuetrich,Mayer,Escher, 2007)	Water (Log)	dimensionless	C1=CC=C2C(=C1)C=CC3=CC4=C(C=CC5=CC=CC=C54)C=C32	278.36	11.779	6.7	-5.079	-5.239	1.85e-09	3.33e-05	-4.47756	-8.73283	111.884	20	-131.884	-5.079	0	0.35	12.45	1.99	2.19
723	Benzo[ghi]perylene	000191-24-2	PDMS	4.27563e+10	10.631	229087	5.36	xxxxxxxxx	xxxxxxxxx	xxxxxxxxx	xxxxxxxxx	xxxxxxxxx	10.631	5.36	25	298	(Kwon,Wuetrich,Mayer,Escher, 2007)	Water (Log)	dimensionless	c1cc2ccc3ccc4ccc5cccc6c5c4c3c2c6c1	276.34	11.971	6.7	-5.271	-5.271	1.17e-07	8.11e-06	-5.09098	-6.93181	117.28	20	-137.28	-5.271	0	0.33	12.89	2.02	2.08
379	1,2-dichlorobenzene	000095-50-1	PDMS	3218.8	3.50769	162.181	2.21	xxxxxxxxx	xxxxxxxxx	xxxxxxxxx	xxxxxxxxx	xxxxxxxxx	3.4768	2.2218	24	297	(Leslie, ter Laak, Busser, Kraak, Hermens, 2002)	Water (Log)	dimensionless	C1=CC=C(C(=C1)Cl)Cl	147	4.535	3.28	-1.255	-1.105	129	196	2.29226	2.11059	52.3376	20	-72.3376	-1.29769	0	0.1	4.33	0.85	0.96
110	4-chloro-3-methylphenol	000059-50-7	PDMS	1.98229e+06	6.29717	70.7946	1.85	xxxxxxxxx	xxxxxxxxx	xxxxxxxxx	xxxxxxxxx	xxxxxxxxx	6.2608	1.8618	24	297	(Leslie, ter Laak, Busser, Kraak, Hermens, 2002)	Water (Log)	dimensionless	CC1=C(C=CC(=C1)O)Cl	142.59	7.099	2.7	-4.399	-3.999	1.37	17.3	1.23805	0.136721	61.6103	20	-81.6103	-4.44717	0.67	0.38	4.79	0.96	1.04
322	1,2,3-trichlorobenzene	000087-61-6	PDMS	39592.9	4.59762	1380.38	3.14	xxxxxxxxx	xxxxxxxxx	xxxxxxxxx	xxxxxxxxx	xxxxxxxxx	4.5638	3.1518	24	297	(Leslie, ter Laak, Busser, Kraak, Hermens, 2002)	Water (Log)	dimensionless	C1=CC(=C(C(=C1)Cl)Cl)Cl	181.45	5.342	3.93	-1.412	-1.292	9.58	53.6	1.72916	0.981366	57.2905	20	-77.2905	-1.45762	0	0.04	4.93	0.92	1.08
910	1,2,3,4-Tetrachlorobenzene	000634-66-2	PDMS	307413	5.48772	7943.28	3.9	xxxxxxxxx	xxxxxxxxx	xxxxxxxxx	xxxxxxxxx	xxxxxxxxx	5.4498	3.9118	24	297	(Leslie, ter Laak, Busser, Kraak, Hermens, 2002)	Water (Log)	dimensionless	C1=CC(=C(C(=C1Cl)Cl)Cl)Cl	215.89	6.108	4.57	-1.538	-1.508	1.8	8.68	0.93852	0.255273	64.2449	20	-84.2449	-1.58772	0	0	5.44	1.02	1.21
876	2,4-dichloronitrobenzene	000611-06-3	PDMS	220154	5.34273	100	2	xxxxxxxxx	xxxxxxxxx	xxxxxxxxx	xxxxxxxxx	xxxxxxxxx	5.3018	2.0118	24	297	(Leslie, ter Laak, Busser, Kraak, Hermens, 2002)	Water (Log)	dimensionless	C1=CC(=C(C=C1Cl)Cl)[N+](=O)[O-]	192	6.39	3.1	-3.29	-3.32	1.9	2.29	0.359835	0.278754	69.3349	20	-89.3349	-3.34273	0	0.15	5.61	1.41	1.14
916	2,4,5-trichloroaniline	000636-30-6	PDMS	1.2108e+07	7.08307	123.027	2.09	xxxxxxxxx	xxxxxxxxx	xxxxxxxxx	xxxxxxxxx	xxxxxxxxx	7.0408	2.1018	24	297	(Leslie, ter Laak, Busser, Kraak, Hermens, 2002)	Water (Log)	dimensionless	C1=C(C(=CC(=C1Cl)Cl)Cl)N	196.46	7.949	3.01	-4.939	-4.499	0.255	1.26	0.100371	-0.59346	71.6172	20	-91.6172	-4.99307	0.35	0.27	5.9	1.36	1.18
873	pentachlorobenzene	000608-93-5	PDMS	928930	5.96798	26302.7	4.42	xxxxxxxxx	xxxxxxxxx	xxxxxxxxx	xxxxxxxxx	xxxxxxxxx	5.9238	4.4318	24	297	(Leslie, ter Laak, Busser, Kraak, Hermens, 2002)	Water (Log)	dimensionless	C1=C(C(=C(C(=C1Cl)Cl)Cl)Cl)Cl	250.34	6.712	5.22	-1.492	-1.542	0.227	0.54	-0.267606	-0.643974	74.8538	20	-94.8538	-1.54798	0	0	6	1.13	1.33
1049	2,3,4-trichloronitrobenzene	017700-09-3	PDMS	1.14168e+06	6.05754	478.63	2.68	xxxxxxxxx	xxxxxxxxx	xxxxxxxxx	xxxxxxxxx	xxxxxxxxx	6.0128	2.6918	24	297	(Leslie, ter Laak, Busser, Kraak, Hermens, 2002)	Water (Log)	dimensionless	C1=CC(=C(C(=C1[N+](=O)[O-])Cl)Cl)Cl	226.45	7.061	3.74	-3.321	-3.451	0.222	0.421	-0.375718	-0.653647	75.8048	20	-95.8048	-3.37754	0	0.13	6.41	1.49	1.26
1004	2,3,5,6-tetrachloroaniline	003481-20-7	PDMS	2.2254e+08	8.34741	1621.81	3.21	xxxxxxxxx	xxxxxxxxx	xxxxxxxxx	xxxxxxxxx	xxxxxxxxx	8.3018	3.2218	24	297	(Leslie, ter Laak, Busser, Kraak, Hermens, 2002)	Water (Log)	dimensionless	C1=C(C(=C(C(=C1Cl)Cl)N)Cl)Cl	230.91	8.73	3.65	-5.08	-4.63	0.0463	0.287	-0.542118	-1.33442	77.2684	20	-97.2684	-5.13741	0.33	0.17	6.57	1.42	1.31
105	Hexachlorobenzene	000058-89-9	PDMS	2.87866e+08	8.45919	69183.1	4.84	xxxxxxxxx	xxxxxxxxx	xxxxxxxxx	xxxxxxxxx	xxxxxxxxx	8.4088	4.8518	24	297	(Leslie, ter Laak, Busser, Kraak, Hermens, 2002)	Water (Log)	dimensionless	C1(C(C(C(C(C1Cl)Cl)Cl)Cl)Cl)Cl	290.83	7.817	4.26	-3.557	-3.677	0.0674	0.0344	-1.46344	-1.17134	85.3722	20	-105.372	-3.61919	0	0.4	7	1.1	1.58
299	Phenanthrene	000085-01-8	PDMS	7.80869e+06	6.89258	7943.28	3.9	xxxxxxxxx	xxxxxxxxx	xxxxxxxxx	xxxxxxxxx	xxxxxxxxx	6.79569	3.92369	23	296	(Maruya, Zeng, Tsukada, Bay, 2008)	Water (Log)	dimensionless	C1=CC=C2C(=C1)C=CC3=CC=CC=C32	178.24	7.222	4.35	-2.872	-2.762	0.00576	0.0875	-1.05799	-2.23958	81.806	20	-101.806	-2.99258	0	0.23	7.71	1.34	1.45
300	Phenanthrene	000085-01-8	PDMS	1.23759e+07	7.09258	12589.3	4.1	xxxxxxxxx	xxxxxxxxx	xxxxxxxxx	xxxxxxxxx	xxxxxxxxx	6.99569	4.12369	23	296	(Maruya, Zeng, Tsukada, Bay, 2008)	Water (Log)	dimensionless	C1=CC=C2C(=C1)C=CC3=CC=CC=C32	178.24	7.222	4.35	-2.872	-2.762	0.00576	0.0875	-1.05799	-2.23958	81.806	20	-101.806	-2.99258	0	0.23	7.71	1.34	1.45
301	Phenanthrene	000085-01-8	PDMS	2.0539e+07	7.31258	20893	4.32	xxxxxxxxx	xxxxxxxxx	xxxxxxxxx	xxxxxxxxx	xxxxxxxxx	7.21569	4.34369	23	296	(Maruya, Zeng, Tsukada, Bay, 2008)	Water (Log)	dimensionless	C1=CC=C2C(=C1)C=CC3=CC=CC=C32	178.24	7.222	4.35	-2.872	-2.762	0.00576	0.0875	-1.05799	-2.23958	81.806	20	-101.806	-2.99258	0	0.23	7.71	1.34	1.45
1130	PCB-52	035693-99-3	PDMS	3.07023e+07	7.48717	331131	5.52	xxxxxxxxx	xxxxxxxxx	xxxxxxxxx	xxxxxxxxx	xxxxxxxxx	7.38069	5.54369	23	296	(Maruya, Zeng, Tsukada, Bay, 2008)	Water (Log)	dimensionless	C1=CC(=C(C=C1Cl)C2=C(C=CC(=C2)Cl)Cl)Cl	291.99	8.177	6.34	-1.837	-2.087	0.00113	0.0105	-1.97881	-2.94692	89.9054	20	-109.905	-1.96717	0	0.18	8.64	1.55	1.81
1128	PCB-52	035693-99-3	PDMS	4.2381e+07	7.62717	457088	5.66	xxxxxxxxx	xxxxxxxxx	xxxxxxxxx	xxxxxxxxx	xxxxxxxxx	7.52069	5.68369	23	296	(Maruya, Zeng, Tsukada, Bay, 2008)	Water (Log)	dimensionless	C1=CC(=C(C=C1Cl)C2=C(C=CC(=C2)Cl)Cl)Cl	291.99	8.177	6.34	-1.837	-2.087	0.00113	0.0105	-1.97881	-2.94692	89.9054	20	-109.905	-1.96717	0	0.18	8.64	1.55	1.81
1129	PCB-52	035693-99-3	PDMS	4.75523e+07	7.67717	512861	5.71	xxxxxxxxx	xxxxxxxxx	xxxxxxxxx	xxxxxxxxx	xxxxxxxxx	7.57069	5.73369	23	296	(Maruya, Zeng, Tsukada, Bay, 2008)	Water (Log)	dimensionless	C1=CC(=C(C=C1Cl)C2=C(C=CC(=C2)Cl)Cl)Cl	291.99	8.177	6.34	-1.837	-2.087	0.00113	0.0105	-1.97881	-2.94692	89.9054	20	-109.905	-1.96717	0	0.18	8.64	1.55	1.81
759	fluoranthene	000206-44-0	PDMS	1.15436e+08	8.06234	18197	4.26	xxxxxxxxx	xxxxxxxxx	xxxxxxxxx	xxxxxxxxx	xxxxxxxxx	7.95469	4.28369	23	296	(Maruya, Zeng, Tsukada, Bay, 2008)	Water (Log)	dimensionless	C1=CC=C2C(=C1)C3=CC=CC4=C3C2=CC=C4	202.26	8.601	4.93	-3.671	-3.441	0.000417	0.00811	-2.09098	-3.37986	90.892	20	-110.892	-3.80234	0	0.25	9.11	1.52	1.58
760	fluoranthene	000206-44-0	PDMS	2.25082e+08	8.35234	35481.3	4.55	xxxxxxxxx	xxxxxxxxx	xxxxxxxxx	xxxxxxxxx	xxxxxxxxx	8.24469	4.57369	23	296	(Maruya, Zeng, Tsukada, Bay, 2008)	Water (Log)	dimensionless	C1=CC=C2C(=C1)C3=CC=CC4=C3C2=CC=C4	202.26	8.601	4.93	-3.671	-3.441	0.000417	0.00811	-2.09098	-3.37986	90.892	20	-110.892	-3.80234	0	0.25	9.11	1.52	1.58
761	fluoranthene	000206-44-0	PDMS	3.10699e+08	8.49234	48977.9	4.69	xxxxxxxxx	xxxxxxxxx	xxxxxxxxx	xxxxxxxxx	xxxxxxxxx	8.38469	4.71369	23	296	(Maruya, Zeng, Tsukada, Bay, 2008)	Water (Log)	dimensionless	C1=CC=C2C(=C1)C3=CC=CC4=C3C2=CC=C4	202.26	8.601	4.93	-3.671	-3.441	0.000417	0.00811	-2.09098	-3.37986	90.892	20	-110.892	-3.80234	0	0.25	9.11	1.52	1.58
211	p,p'-DDE	000072-55-9	PDMS	3.83902e+09	9.58422	1.47911e+06	6.17	xxxxxxxxx	xxxxxxxxx	xxxxxxxxx	xxxxxxxxx	xxxxxxxxx	9.47269	6.19369	23	296	(Maruya, Zeng, Tsukada, Bay, 2008)	Water (Log)	dimensionless	C1=CC(=CC=C1C(=C(Cl)Cl)C2=CC=C(C=C2)Cl)Cl	318.03	9.279	6	-3.279	-2.769	0.00913	0.00344	-2.46344	-2.03953	94.1681	20	-114.168	-3.41422	0	0.3	9.38	1.53	2.05
209	p,p'-DDE	000072-55-9	PDMS	4.83304e+09	9.68422	1.86209e+06	6.27	xxxxxxxxx	xxxxxxxxx	xxxxxxxxx	xxxxxxxxx	xxxxxxxxx	9.57269	6.29369	23	296	(Maruya, Zeng, Tsukada, Bay, 2008)	Water (Log)	dimensionless	C1=CC(=CC=C1C(=C(Cl)Cl)C2=CC=C(C=C2)Cl)Cl	318.03	9.279	6	-3.279	-2.769	0.00913	0.00344	-2.46344	-2.03953	94.1681	20	-114.168	-3.41422	0	0.3	9.38	1.53	2.05
210	p,p'-DDE	000072-55-9	PDMS	8.20767e+09	9.91422	3.16228e+06	6.5	xxxxxxxxx	xxxxxxxxx	xxxxxxxxx	xxxxxxxxx	xxxxxxxxx	9.80269	6.52369	23	296	(Maruya, Zeng, Tsukada, Bay, 2008)	Water (Log)	dimensionless	C1=CC(=CC=C1C(=C(Cl)Cl)C2=CC=C(C=C2)Cl)Cl	318.03	9.279	6	-3.279	-2.769	0.00913	0.00344	-2.46344	-2.03953	94.1681	20	-114.168	-3.41422	0	0.3	9.38	1.53	2.05
954	heptachlor epoxide	001024-57-3	PDMS	1.22623e+08	8.08857	30199.5	4.48	xxxxxxxxx	xxxxxxxxx	xxxxxxxxx	xxxxxxxxx	xxxxxxxxx	7.98969	4.50369	23	296	(Maruya, Zeng, Tsukada, Bay, 2008)	Water (Log)	dimensionless	C12C(C(C3C1O3)Cl)C4(C(=C(C2(C4(Cl)Cl)Cl)Cl)Cl)Cl	389.32	8.046	4.56	-3.486	-3.066	0.0012	0.0563	-1.24949	-2.92082	83.4904	20	-103.49	-3.60857	0	0.6	9.4	1.38	1.96
952	heptachlor epoxide	001024-57-3	PDMS	1.77245e+08	8.24857	43651.6	4.64	xxxxxxxxx	xxxxxxxxx	xxxxxxxxx	xxxxxxxxx	xxxxxxxxx	8.14969	4.66369	23	296	(Maruya, Zeng, Tsukada, Bay, 2008)	Water (Log)	dimensionless	C12C(C(C3C1O3)Cl)C4(C(=C(C2(C4(Cl)Cl)Cl)Cl)Cl)Cl	389.32	8.046	4.56	-3.486	-3.066	0.0012	0.0563	-1.24949	-2.92082	83.4904	20	-103.49	-3.60857	0	0.6	9.4	1.38	1.96
953	heptachlor epoxide	001024-57-3	PDMS	2.03504e+08	8.30857	50118.7	4.7	xxxxxxxxx	xxxxxxxxx	xxxxxxxxx	xxxxxxxxx	xxxxxxxxx	8.20969	4.72369	23	296	(Maruya, Zeng, Tsukada, Bay, 2008)	Water (Log)	dimensionless	C12C(C(C3C1O3)Cl)C4(C(=C(C2(C4(Cl)Cl)Cl)Cl)Cl)Cl	389.32	8.046	4.56	-3.486	-3.066	0.0012	0.0563	-1.24949	-2.92082	83.4904	20	-103.49	-3.60857	0	0.6	9.4	1.38	1.96
192	p,p'-DDD	000072-54-8	PDMS	7.9227e+09	9.89887	1.09648e+06	6.04	xxxxxxxxx	xxxxxxxxx	xxxxxxxxx	xxxxxxxxx	xxxxxxxxx	9.78269	6.06369	23	296	(Maruya, Zeng, Tsukada, Bay, 2008)	Water (Log)	dimensionless	C1=CC(=CC=C1C(C2=CC=C(C=C2)Cl)C(Cl)Cl)Cl	320.05	9.589	5.87	-3.719	-3.569	0.0026	0.00123	-2.91009	-2.58503	98.0968	20	-118.097	-3.85887	0.09	0.22	9.45	1.44	2.1
194	p,p'-DDD	000072-54-8	PDMS	9.30836e+09	9.96887	1.28825e+06	6.11	xxxxxxxxx	xxxxxxxxx	xxxxxxxxx	xxxxxxxxx	xxxxxxxxx	9.85269	6.13369	23	296	(Maruya, Zeng, Tsukada, Bay, 2008)	Water (Log)	dimensionless	C1=CC(=CC=C1C(C2=CC=C(C=C2)Cl)C(Cl)Cl)Cl	320.05	9.589	5.87	-3.719	-3.569	0.0026	0.00123	-2.91009	-2.58503	98.0968	20	-118.097	-3.85887	0.09	0.22	9.45	1.44	2.1
193	p,p'-DDD	000072-54-8	PDMS	3.30273e+10	10.5189	4.57088e+06	6.66	xxxxxxxxx	xxxxxxxxx	xxxxxxxxx	xxxxxxxxx	xxxxxxxxx	10.4027	6.68369	23	296	(Maruya, Zeng, Tsukada, Bay, 2008)	Water (Log)	dimensionless	C1=CC(=CC=C1C(C2=CC=C(C=C2)Cl)C(Cl)Cl)Cl	320.05	9.589	5.87	-3.719	-3.569	0.0026	0.00123	-2.91009	-2.58503	98.0968	20	-118.097	-3.85887	0.09	0.22	9.45	1.44	2.1
1010	?ñ-chlordane	005103-71-9	PDMS	1.45605e+08	8.16318	234423	5.37	xxxxxxxxx	xxxxxxxxx	xxxxxxxxx	xxxxxxxxx	xxxxxxxxx	8.05569	5.39369	23	296	(Maruya, Zeng, Tsukada, Bay, 2008)	Water (Log)	dimensionless	C1C2C(C(C1Cl)Cl)C3(C(=C(C2(C3(Cl)Cl)Cl)Cl)Cl)Cl	409.78	8.922	6.26	-2.662	-2.702	0.00267	0.00841	-2.0752	-2.57349	90.7532	20	-110.753	-2.79318	0	0.45	9.76	1.31	2.13
1008	?ñ-chlordane	005103-71-9	PDMS	2.41644e+08	8.38318	389045	5.59	xxxxxxxxx	xxxxxxxxx	xxxxxxxxx	xxxxxxxxx	xxxxxxxxx	8.27569	5.61369	23	296	(Maruya, Zeng, Tsukada, Bay, 2008)	Water (Log)	dimensionless	C1C2C(C(C1Cl)Cl)C3(C(=C(C2(C3(Cl)Cl)Cl)Cl)Cl)Cl	409.78	8.922	6.26	-2.662	-2.702	0.00267	0.00841	-2.0752	-2.57349	90.7532	20	-110.753	-2.79318	0	0.45	9.76	1.31	2.13
1009	?ñ-chlordane	005103-71-9	PDMS	2.83907e+08	8.45318	457088	5.66	xxxxxxxxx	xxxxxxxxx	xxxxxxxxx	xxxxxxxxx	xxxxxxxxx	8.34569	5.68369	23	296	(Maruya, Zeng, Tsukada, Bay, 2008)	Water (Log)	dimensionless	C1C2C(C(C1Cl)Cl)C3(C(=C(C2(C3(Cl)Cl)Cl)Cl)Cl)Cl	409.78	8.922	6.26	-2.662	-2.702	0.00267	0.00841	-2.0752	-2.57349	90.7532	20	-110.753	-2.79318	0	0.45	9.76	1.31	2.13
20	p,p'-DDT	000050-29-3	PDMS	3.14492e+09	9.49761	575440	5.76	xxxxxxxxx	xxxxxxxxx	xxxxxxxxx	xxxxxxxxx	xxxxxxxxx	9.37169	5.78369	23	296	(Maruya, Zeng, Tsukada, Bay, 2008)	Water (Log)	dimensionless	C1=CC(=CC=C1C(C2=CC=C(C=C2)Cl)C(Cl)(Cl)Cl)Cl	354.49	10.378	6.79	-3.588	-3.468	0.000996	0.000143	-3.84466	-3.00174	106.317	20	-126.317	-3.73761	0	0.22	9.88	1.51	2.22
18	p,p'-DDT	000050-29-3	PDMS	3.69496e+09	9.56761	676083	5.83	xxxxxxxxx	xxxxxxxxx	xxxxxxxxx	xxxxxxxxx	xxxxxxxxx	9.44169	5.85369	23	296	(Maruya, Zeng, Tsukada, Bay, 2008)	Water (Log)	dimensionless	C1=CC(=CC=C1C(C2=CC=C(C=C2)Cl)C(Cl)(Cl)Cl)Cl	354.49	10.378	6.79	-3.588	-3.468	0.000996	0.000143	-3.84466	-3.00174	106.317	20	-126.317	-3.73761	0	0.22	9.88	1.51	2.22
19	p,p'-DDT	000050-29-3	PDMS	6.27494e+09	9.79761	1.14815e+06	6.06	xxxxxxxxx	xxxxxxxxx	xxxxxxxxx	xxxxxxxxx	xxxxxxxxx	9.67169	6.08369	23	296	(Maruya, Zeng, Tsukada, Bay, 2008)	Water (Log)	dimensionless	C1=CC(=CC=C1C(C2=CC=C(C=C2)Cl)C(Cl)(Cl)Cl)Cl	354.49	10.378	6.79	-3.588	-3.468	0.000996	0.000143	-3.84466	-3.00174	106.317	20	-126.317	-3.73761	0	0.22	9.88	1.51	2.22
1105	PCB-153	035065-27-1	PDMS	5.48084e+09	9.73885	2.81838e+06	6.45	xxxxxxxxx	xxxxxxxxx	xxxxxxxxx	xxxxxxxxx	xxxxxxxxx	9.63069	6.47369	23	296	(Maruya, Zeng, Tsukada, Bay, 2008)	Water (Log)	dimensionless	C1=C(C(=CC(=C1Cl)Cl)Cl)C2=CC(=C(C=C2Cl)Cl)Cl	360.88	10.777	7.62	-3.157	-3.027	7.74e-05	0.00725	-2.13966	-4.11126	91.3202	20	-111.32	-3.28885	0	0.04	9.95	1.68	2.06
1104	PCB-153	035065-27-1	PDMS	7.56566e+09	9.87885	3.89045e+06	6.59	xxxxxxxxx	xxxxxxxxx	xxxxxxxxx	xxxxxxxxx	xxxxxxxxx	9.77069	6.61369	23	296	(Maruya, Zeng, Tsukada, Bay, 2008)	Water (Log)	dimensionless	C1=C(C(=CC(=C1Cl)Cl)Cl)C2=CC(=C(C=C2Cl)Cl)Cl	360.88	10.777	7.62	-3.157	-3.027	7.74e-05	0.00725	-2.13966	-4.11126	91.3202	20	-111.32	-3.28885	0	0.04	9.95	1.68	2.06
1103	PCB-153	035065-27-1	PDMS	9.3078e+09	9.96885	4.7863e+06	6.68	xxxxxxxxx	xxxxxxxxx	xxxxxxxxx	xxxxxxxxx	xxxxxxxxx	9.86069	6.70369	23	296	(Maruya, Zeng, Tsukada, Bay, 2008)	Water (Log)	dimensionless	C1=C(C(=CC(=C1Cl)Cl)Cl)C2=CC(=C(C=C2Cl)Cl)Cl	360.88	10.777	7.62	-3.157	-3.027	7.74e-05	0.00725	-2.13966	-4.11126	91.3202	20	-111.32	-3.28885	0	0.04	9.95	1.68	2.06
1182	trans-nonachlor	039765-80-5	PDMS	5.26311e+08	8.72124	478630	5.68	xxxxxxxxx	xxxxxxxxx	xxxxxxxxx	xxxxxxxxx	xxxxxxxxx	8.60769	5.70369	23	296	(Maruya, Zeng, Tsukada, Bay, 2008)	Water (Log)	dimensionless	C12C(C(C(C1Cl)Cl)Cl)C3(C(=C(C2(C3(Cl)Cl)Cl)Cl)Cl)Cl	444.23	9.344	6.44	-2.904	-2.994	0.000288	0.0022	-2.65758	-3.54061	95.8757	20	-115.876	-3.04124	0	0.52	10.43	1.45	2.25
1180	trans-nonachlor	039765-80-5	PDMS	9.57729e+08	8.98124	870964	5.94	xxxxxxxxx	xxxxxxxxx	xxxxxxxxx	xxxxxxxxx	xxxxxxxxx	8.86769	5.96369	23	296	(Maruya, Zeng, Tsukada, Bay, 2008)	Water (Log)	dimensionless	C12C(C(C(C1Cl)Cl)Cl)C3(C(=C(C2(C3(Cl)Cl)Cl)Cl)Cl)Cl	444.23	9.344	6.44	-2.904	-2.994	0.000288	0.0022	-2.65758	-3.54061	95.8757	20	-115.876	-3.04124	0	0.52	10.43	1.45	2.25
1181	trans-nonachlor	039765-80-5	PDMS	1.5179e+09	9.18124	1.38038e+06	6.14	xxxxxxxxx	xxxxxxxxx	xxxxxxxxx	xxxxxxxxx	xxxxxxxxx	9.06769	6.16369	23	296	(Maruya, Zeng, Tsukada, Bay, 2008)	Water (Log)	dimensionless	C12C(C(C(C1Cl)Cl)Cl)C3(C(=C(C2(C3(Cl)Cl)Cl)Cl)Cl)Cl	444.23	9.344	6.44	-2.904	-2.994	0.000288	0.0022	-2.65758	-3.54061	95.8757	20	-115.876	-3.04124	0	0.52	10.43	1.45	2.25
1116	PCB-180	035065-29-3	PDMS	7.83005e+09	9.89376	2.34423e+06	6.37	xxxxxxxxx	xxxxxxxxx	xxxxxxxxx	xxxxxxxxx	xxxxxxxxx	9.78169	6.39369	23	296	(Maruya, Zeng, Tsukada, Bay, 2008)	Water (Log)	dimensionless	C1=C(C(=CC(=C1Cl)Cl)Cl)C2=CC(=C(C(=C2Cl)Cl)Cl)Cl	395.33	11.658	8.27	-3.388	-3.388	1.74e-05	0.00305	-2.5157	-4.75945	94.6278	20	-114.628	-3.52376	0	0	10.61	1.75	2.18
1117	PCB-180	035065-29-3	PDMS	1.15815e+10	10.0638	3.46737e+06	6.54	xxxxxxxxx	xxxxxxxxx	xxxxxxxxx	xxxxxxxxx	xxxxxxxxx	9.95169	6.56369	23	296	(Maruya, Zeng, Tsukada, Bay, 2008)	Water (Log)	dimensionless	C1=C(C(=CC(=C1Cl)Cl)Cl)C2=CC(=C(C(=C2Cl)Cl)Cl)Cl	395.33	11.658	8.27	-3.388	-3.388	1.74e-05	0.00305	-2.5157	-4.75945	94.6278	20	-114.628	-3.52376	0	0	10.61	1.75	2.18
1115	PCB-180	035065-29-3	PDMS	1.92205e+10	10.2838	5.7544e+06	6.76	xxxxxxxxx	xxxxxxxxx	xxxxxxxxx	xxxxxxxxx	xxxxxxxxx	10.1717	6.78369	23	296	(Maruya, Zeng, Tsukada, Bay, 2008)	Water (Log)	dimensionless	C1=C(C(=CC(=C1Cl)Cl)Cl)C2=CC(=C(C(=C2Cl)Cl)Cl)Cl	395.33	11.658	8.27	-3.388	-3.388	1.74e-05	0.00305	-2.5157	-4.75945	94.6278	20	-114.628	-3.52376	0	0	10.61	1.75	2.18
30	Benzo[a]pyrene	000050-32-8	PDMS	5.3316e+10	10.7269	660693	5.82	xxxxxxxxx	xxxxxxxxx	xxxxxxxxx	xxxxxxxxx	xxxxxxxxx	10.5927	5.84369	23	296	(Maruya, Zeng, Tsukada, Bay, 2008)	Water (Log)	dimensionless	C1=CC=C2C3=C4C(=CC2=C1)C=CC5=C4C(=CC=C5)C=C3	252.32	10.859	6.11	-4.749	-4.729	1.31e-07	2.31e-05	-4.63639	-6.88273	113.281	20	-133.281	-4.90686	0	0.31	11.48	1.84	1.95
31	Benzo[a]pyrene	000050-32-8	PDMS	9.26525e+10	10.9669	1.14815e+06	6.06	xxxxxxxxx	xxxxxxxxx	xxxxxxxxx	xxxxxxxxx	xxxxxxxxx	10.8327	6.08369	23	296	(Maruya, Zeng, Tsukada, Bay, 2008)	Water (Log)	dimensionless	C1=CC=C2C3=C4C(=CC2=C1)C=CC5=C4C(=CC=C5)C=C3	252.32	10.859	6.11	-4.749	-4.729	1.31e-07	2.31e-05	-4.63639	-6.88273	113.281	20	-133.281	-4.90686	0	0.31	11.48	1.84	1.95
874	pentachlorobenzene	000608-93-5	PDMS	578096	5.762	18620.9	4.27	xxxxxxxxx	xxxxxxxxx	xxxxxxxxx	xxxxxxxxx	xxxxxxxxx	5.762	4.27	25	298	(Mayer, Vaes, Hermens, 2000)	Water (Log)	dimensionless	C1=C(C(=C(C(=C1Cl)Cl)Cl)Cl)Cl	250.34	6.712	5.22	-1.492	-1.542	0.227	0.54	-0.267606	-0.643974	74.8538	20	-94.8538	-1.492	0	0	6	1.13	1.33
875	pentachlorobenzene	000608-93-5	PDMS	591562	5.772	19054.6	4.28	xxxxxxxxx	xxxxxxxxx	xxxxxxxxx	xxxxxxxxx	xxxxxxxxx	5.772	4.28	25	298	(Mayer, Vaes, Hermens, 2000)	Water (Log)	dimensionless	C1=C(C(=C(C(=C1Cl)Cl)Cl)Cl)Cl	250.34	6.712	5.22	-1.492	-1.542	0.227	0.54	-0.267606	-0.643974	74.8538	20	-94.8538	-1.492	0	0	6	1.13	1.33
106	Hexachlorobenzene	000058-89-9	PDMS	2.02768e+08	8.307	56234.1	4.75	xxxxxxxxx	xxxxxxxxx	xxxxxxxxx	xxxxxxxxx	xxxxxxxxx	8.307	4.75	25	298	(Mayer, Vaes, Hermens, 2000)	Water (Log)	dimensionless	C1(C(C(C(C(C1Cl)Cl)Cl)Cl)Cl)Cl	290.83	7.817	4.26	-3.557	-3.677	0.0674	0.0344	-1.46344	-1.17134	85.3722	20	-105.372	-3.557	0	0.4	7	1.1	1.58
107	Hexachlorobenzene	000058-89-9	PDMS	2.12324e+08	8.327	58884.4	4.77	xxxxxxxxx	xxxxxxxxx	xxxxxxxxx	xxxxxxxxx	xxxxxxxxx	8.327	4.77	25	298	(Mayer, Vaes, Hermens, 2000)	Water (Log)	dimensionless	C1(C(C(C(C(C1Cl)Cl)Cl)Cl)Cl)Cl	290.83	7.817	4.26	-3.557	-3.677	0.0674	0.0344	-1.46344	-1.17134	85.3722	20	-105.372	-3.557	0	0.4	7	1.1	1.58
302	Phenanthrene	000085-01-8	PDMS	2.24905e+06	6.352	3019.95	3.48	xxxxxxxxx	xxxxxxxxx	xxxxxxxxx	xxxxxxxxx	xxxxxxxxx	6.352	3.48	25	298	(Mayer, Vaes, Hermens, 2000)	Water (Log)	dimensionless	C1=CC=C2C(=C1)C=CC3=CC=CC=C32	178.24	7.222	4.35	-2.872	-2.762	0.00576	0.0875	-1.05799	-2.23958	81.806	20	-101.806	-2.872	0	0.23	7.71	1.34	1.45
1131	PCB-52	035693-99-3	PDMS	1.37088e+07	7.137	199526	5.3	xxxxxxxxx	xxxxxxxxx	xxxxxxxxx	xxxxxxxxx	xxxxxxxxx	7.137	5.3	25	298	(Mayer, Vaes, Hermens, 2000)	Water (Log)	dimensionless	C1=CC(=C(C=C1Cl)C2=C(C=CC(=C2)Cl)Cl)Cl	291.99	8.177	6.34	-1.837	-2.087	0.00113	0.0105	-1.97881	-2.94692	89.9054	20	-109.905	-1.837	0	0.18	8.64	1.55	1.81
1132	PCB-52	035693-99-3	PDMS	1.64816e+07	7.217	239883	5.38	xxxxxxxxx	xxxxxxxxx	xxxxxxxxx	xxxxxxxxx	xxxxxxxxx	7.217	5.38	25	298	(Mayer, Vaes, Hermens, 2000)	Water (Log)	dimensionless	C1=CC(=C(C=C1Cl)C2=C(C=CC(=C2)Cl)Cl)Cl	291.99	8.177	6.34	-1.837	-2.087	0.00113	0.0105	-1.97881	-2.94692	89.9054	20	-109.905	-1.837	0	0.18	8.64	1.55	1.81
1090	PCB-65	033284-54-7	PDMS	2.1677e+07	7.336	199526	5.3	xxxxxxxxx	xxxxxxxxx	xxxxxxxxx	xxxxxxxxx	xxxxxxxxx	7.336	5.3	25	298	(Mayer, Vaes, Hermens, 2000)	Water (Log)	dimensionless	C1=CC=C(C=C1)C2=C(C(=CC(=C2Cl)Cl)Cl)Cl	291.99	8.376	6.34	-2.036	-2.036	0.00113	0.0105	-1.97881	-2.94692	89.9054	20	-109.905	-2.036	0	0.05	8.7	1.52	1.81
1091	PCB-65	033284-54-7	PDMS	2.4322e+07	7.386	223872	5.35	xxxxxxxxx	xxxxxxxxx	xxxxxxxxx	xxxxxxxxx	xxxxxxxxx	7.386	5.35	25	298	(Mayer, Vaes, Hermens, 2000)	Water (Log)	dimensionless	C1=CC=C(C=C1)C2=C(C(=CC(=C2Cl)Cl)Cl)Cl	291.99	8.376	6.34	-2.036	-2.036	0.00113	0.0105	-1.97881	-2.94692	89.9054	20	-109.905	-2.036	0	0.05	8.7	1.52	1.81
762	fluoranthene	000206-44-0	PDMS	5.76766e+07	7.761	12302.7	4.09	xxxxxxxxx	xxxxxxxxx	xxxxxxxxx	xxxxxxxxx	xxxxxxxxx	7.761	4.09	25	298	(Mayer, Vaes, Hermens, 2000)	Water (Log)	dimensionless	C1=CC=C2C(=C1)C3=CC=CC4=C3C2=CC=C4	202.26	8.601	4.93	-3.671	-3.441	0.000417	0.00811	-2.09098	-3.37986	90.892	20	-110.892	-3.671	0	0.25	9.11	1.52	1.58
763	fluoranthene	000206-44-0	PDMS	8.531e+07	7.931	18197	4.26	xxxxxxxxx	xxxxxxxxx	xxxxxxxxx	xxxxxxxxx	xxxxxxxxx	7.931	4.26	25	298	(Mayer, Vaes, Hermens, 2000)	Water (Log)	dimensionless	C1=CC=C2C(=C1)C3=CC=CC4=C3C2=CC=C4	202.26	8.601	4.93	-3.671	-3.441	0.000417	0.00811	-2.09098	-3.37986	90.892	20	-110.892	-3.671	0	0.25	9.11	1.52	1.58
1149	PCB-101	037680-73-2	PDMS	6.82339e+07	7.834	380189	5.58	xxxxxxxxx	xxxxxxxxx	xxxxxxxxx	xxxxxxxxx	xxxxxxxxx	7.834	5.58	25	298	(Mayer, Vaes, Hermens, 2000)	Water (Log)	dimensionless	C1=CC(=C(C=C1Cl)C2=CC(=C(C=C2Cl)Cl)Cl)Cl	326.44	9.234	6.98	-2.254	-2.434	0.000295	0.0408	-1.38934	-3.53018	84.7205	20	-104.72	-2.254	0	0.11	9.3	1.61	1.94
1150	PCB-101	037680-73-2	PDMS	9.2045e+07	7.964	512861	5.71	xxxxxxxxx	xxxxxxxxx	xxxxxxxxx	xxxxxxxxx	xxxxxxxxx	7.964	5.71	25	298	(Mayer, Vaes, Hermens, 2000)	Water (Log)	dimensionless	C1=CC(=C(C=C1Cl)C2=CC(=C(C=C2Cl)Cl)Cl)Cl	326.44	9.234	6.98	-2.254	-2.434	0.000295	0.0408	-1.38934	-3.53018	84.7205	20	-104.72	-2.254	0	0.11	9.3	1.61	1.94
1278	PCB-112	074472-36-9	PDMS	9.84011e+07	7.993	371535	5.57	xxxxxxxxx	xxxxxxxxx	xxxxxxxxx	xxxxxxxxx	xxxxxxxxx	7.993	5.57	25	298	(Mayer, Vaes, Hermens, 2000)	Water (Log)	dimensionless	C1=CC(=CC(=C1)Cl)C2=C(C(=CC(=C2Cl)Cl)Cl)Cl	326.44	9.403	6.98	-2.423	-2.423	0.000295	0.00373	-2.42829	-3.53018	93.8589	20	-113.859	-2.423	0	0.04	9.33	1.6	1.94
1279	PCB-112	074472-36-9	PDMS	1.35831e+08	8.133	512861	5.71	xxxxxxxxx	xxxxxxxxx	xxxxxxxxx	xxxxxxxxx	xxxxxxxxx	8.133	5.71	25	298	(Mayer, Vaes, Hermens, 2000)	Water (Log)	dimensionless	C1=CC(=CC(=C1)Cl)C2=C(C(=CC(=C2Cl)Cl)Cl)Cl	326.44	9.403	6.98	-2.423	-2.423	0.000295	0.00373	-2.42829	-3.53018	93.8589	20	-113.859	-2.423	0	0.04	9.33	1.6	1.94
212	p,p'-DDE	000072-55-9	PDMS	1.1722e+09	9.069	616595	5.79	xxxxxxxxx	xxxxxxxxx	xxxxxxxxx	xxxxxxxxx	xxxxxxxxx	9.069	5.79	25	298	(Mayer, Vaes, Hermens, 2000)	Water (Log)	dimensionless	C1=CC(=CC=C1C(=C(Cl)Cl)C2=CC=C(C=C2)Cl)Cl	318.03	9.279	6	-3.279	-2.769	0.00913	0.00344	-2.46344	-2.03953	94.1681	20	-114.168	-3.279	0	0.3	9.38	1.53	2.05
213	p,p'-DDE	000072-55-9	PDMS	1.44212e+09	9.159	758578	5.88	xxxxxxxxx	xxxxxxxxx	xxxxxxxxx	xxxxxxxxx	xxxxxxxxx	9.159	5.88	25	298	(Mayer, Vaes, Hermens, 2000)	Water (Log)	dimensionless	C1=CC(=CC=C1C(=C(Cl)Cl)C2=CC=C(C=C2)Cl)Cl	318.03	9.279	6	-3.279	-2.769	0.00913	0.00344	-2.46344	-2.03953	94.1681	20	-114.168	-3.279	0	0.3	9.38	1.53	2.05
1065	PCB-118	031508-00-6	PDMS	8.29851e+07	7.919	707946	5.85	xxxxxxxxx	xxxxxxxxx	xxxxxxxxx	xxxxxxxxx	xxxxxxxxx	7.919	5.85	25	298	(Mayer, Vaes, Hermens, 2000)	Water (Log)	dimensionless	C1=CC(=C(C=C1C2=CC(=C(C=C2Cl)Cl)Cl)Cl)Cl	326.44	9.049	6.98	-2.069	-1.929	0.000295	0.0145	-1.83863	-3.53018	88.6724	20	-108.672	-2.069	0	0.11	9.5	1.59	1.94
1066	PCB-118	031508-00-6	PDMS	8.6896e+07	7.939	741310	5.87	xxxxxxxxx	xxxxxxxxx	xxxxxxxxx	xxxxxxxxx	xxxxxxxxx	7.939	5.87	25	298	(Mayer, Vaes, Hermens, 2000)	Water (Log)	dimensionless	C1=CC(=C(C=C1C2=CC(=C(C=C2Cl)Cl)Cl)Cl)Cl	326.44	9.049	6.98	-2.069	-1.929	0.000295	0.0145	-1.83863	-3.53018	88.6724	20	-108.672	-2.069	0	0.11	9.5	1.59	1.94
1075	PCB-105	032598-14-4	PDMS	2.73527e+07	7.437	489779	5.69	xxxxxxxxx	xxxxxxxxx	xxxxxxxxx	xxxxxxxxx	xxxxxxxxx	7.437	5.69	25	298	(Mayer, Vaes, Hermens, 2000)	Water (Log)	dimensionless	C1=CC(=C(C=C1C2=C(C(=C(C=C2)Cl)Cl)Cl)Cl)Cl	326.44	8.727	6.98	-1.747	-1.937	0.000295	0.0106	-1.97469	-3.53018	89.8692	20	-109.869	-1.747	0	0.12	9.65	1.56	1.94
1076	PCB-105	032598-14-4	PDMS	4.33511e+07	7.637	776247	5.89	xxxxxxxxx	xxxxxxxxx	xxxxxxxxx	xxxxxxxxx	xxxxxxxxx	7.637	5.89	25	298	(Mayer, Vaes, Hermens, 2000)	Water (Log)	dimensionless	C1=CC(=C(C=C1C2=C(C(=C(C=C2)Cl)Cl)Cl)Cl)Cl	326.44	8.727	6.98	-1.747	-1.937	0.000295	0.0106	-1.97469	-3.53018	89.8692	20	-109.869	-1.747	0	0.12	9.65	1.56	1.94
1094	PCB-155	033979-03-2	PDMS	5.74116e+06	6.759	691831	5.84	xxxxxxxxx	xxxxxxxxx	xxxxxxxxx	xxxxxxxxx	xxxxxxxxx	6.759	5.84	25	298	(Mayer, Vaes, Hermens, 2000)	Water (Log)	dimensionless	C1=C(C=C(C(=C1Cl)C2=C(C=C(C=C2Cl)Cl)Cl)Cl)Cl	360.88	8.539	7.62	-0.919	-0.989	7.74e-05	0.0253	-1.59688	-4.11126	86.546	20	-106.546	-0.919	0	0.03	9.8	1.6	2.06
1095	PCB-155	033979-03-2	PDMS	8.89201e+06	6.949	1.07152e+06	6.03	xxxxxxxxx	xxxxxxxxx	xxxxxxxxx	xxxxxxxxx	xxxxxxxxx	6.949	6.03	25	298	(Mayer, Vaes, Hermens, 2000)	Water (Log)	dimensionless	C1=C(C=C(C(=C1Cl)C2=C(C=C(C=C2Cl)Cl)Cl)Cl)Cl	360.88	8.539	7.62	-0.919	-0.989	7.74e-05	0.0253	-1.59688	-4.11126	86.546	20	-106.546	-0.919	0	0.03	9.8	1.6	2.06
1248	PCB-154	060145-22-4	PDMS	2.20293e+08	8.343	616595	5.79	xxxxxxxxx	xxxxxxxxx	xxxxxxxxx	xxxxxxxxx	xxxxxxxxx	8.343	5.79	25	298	(Mayer, Vaes, Hermens, 2000)	Water (Log)	dimensionless	C1=C(C=C(C(=C1Cl)C2=CC(=C(C=C2Cl)Cl)Cl)Cl)Cl	360.88	10.173	7.62	-2.553	-2.553	7.74e-05	0.00132	-2.87943	-4.11126	97.8271	20	-117.827	-2.553	0	0.03	9.88	1.64	2.06
1249	PCB-154	060145-22-4	PDMS	5.28445e+08	8.723	1.47911e+06	6.17	xxxxxxxxx	xxxxxxxxx	xxxxxxxxx	xxxxxxxxx	xxxxxxxxx	8.723	6.17	25	298	(Mayer, Vaes, Hermens, 2000)	Water (Log)	dimensionless	C1=C(C=C(C(=C1Cl)C2=CC(=C(C=C2Cl)Cl)Cl)Cl)Cl	360.88	10.173	7.62	-2.553	-2.553	7.74e-05	0.00132	-2.87943	-4.11126	97.8271	20	-117.827	-2.553	0	0.03	9.88	1.64	2.06
1106	PCB-153	035065-27-1	PDMS	7.70903e+08	8.887	537032	5.73	xxxxxxxxx	xxxxxxxxx	xxxxxxxxx	xxxxxxxxx	xxxxxxxxx	8.887	5.73	25	298	(Mayer, Vaes, Hermens, 2000)	Water (Log)	dimensionless	C1=C(C(=CC(=C1Cl)Cl)Cl)C2=CC(=C(C=C2Cl)Cl)Cl	360.88	10.777	7.62	-3.157	-3.027	7.74e-05	0.00725	-2.13966	-4.11126	91.3202	20	-111.32	-3.157	0	0.04	9.95	1.68	2.06
1107	PCB-153	035065-27-1	PDMS	2.07491e+09	9.317	1.44544e+06	6.16	xxxxxxxxx	xxxxxxxxx	xxxxxxxxx	xxxxxxxxx	xxxxxxxxx	9.317	6.16	25	298	(Mayer, Vaes, Hermens, 2000)	Water (Log)	dimensionless	C1=C(C(=CC(=C1Cl)Cl)Cl)C2=CC(=C(C=C2Cl)Cl)Cl	360.88	10.777	7.62	-3.157	-3.027	7.74e-05	0.00725	-2.13966	-4.11126	91.3202	20	-111.32	-3.157	0	0.04	9.95	1.68	2.06
1110	PCB-138	035065-28-2	PDMS	3.76704e+08	8.576	489779	5.69	xxxxxxxxx	xxxxxxxxx	xxxxxxxxx	xxxxxxxxx	xxxxxxxxx	8.576	5.69	25	298	(Mayer, Vaes, Hermens, 2000)	Water (Log)	dimensionless	C1=CC(=C(C(=C1C2=CC(=C(C=C2Cl)Cl)Cl)Cl)Cl)Cl	360.88	10.506	7.62	-2.886	-3.066	7.74e-05	0.00803	-2.09528	-4.11126	90.9299	20	-110.93	-2.886	0	0.05	10.1	1.65	2.06
1111	PCB-138	035065-28-2	PDMS	1.21899e+09	9.086	1.58489e+06	6.2	xxxxxxxxx	xxxxxxxxx	xxxxxxxxx	xxxxxxxxx	xxxxxxxxx	9.086	6.2	25	298	(Mayer, Vaes, Hermens, 2000)	Water (Log)	dimensionless	C1=CC(=C(C(=C1C2=CC(=C(C=C2Cl)Cl)Cl)Cl)Cl)Cl	360.88	10.506	7.62	-2.886	-3.066	7.74e-05	0.00803	-2.09528	-4.11126	90.9299	20	-110.93	-2.886	0	0.05	10.1	1.65	2.06
1166	PCB-156	038380-08-4	PDMS	1.26765e+08	8.103	776247	5.89	xxxxxxxxx	xxxxxxxxx	xxxxxxxxx	xxxxxxxxx	xxxxxxxxx	8.103	5.89	25	298	(Mayer, Vaes, Hermens, 2000)	Water (Log)	dimensionless	C1=CC(=C(C=C1C2=CC(=C(C(=C2Cl)Cl)Cl)Cl)Cl)Cl	360.88	9.833	7.62	-2.213	-2.233	7.74e-05	0.0034	-2.46852	-4.11126	94.2128	20	-114.213	-2.213	0	0.04	10.16	1.65	2.06
1167	PCB-156	038380-08-4	PDMS	3.11172e+08	8.493	1.90546e+06	6.28	xxxxxxxxx	xxxxxxxxx	xxxxxxxxx	xxxxxxxxx	xxxxxxxxx	8.493	6.28	25	298	(Mayer, Vaes, Hermens, 2000)	Water (Log)	dimensionless	C1=CC(=C(C=C1C2=CC(=C(C(=C2Cl)Cl)Cl)Cl)Cl)Cl	360.88	9.833	7.62	-2.213	-2.233	7.74e-05	0.0034	-2.46852	-4.11126	94.2128	20	-114.213	-2.213	0	0.04	10.16	1.65	2.06
1118	PCB-180	035065-29-3	PDMS	1.69044e+09	9.228	691831	5.84	xxxxxxxxx	xxxxxxxxx	xxxxxxxxx	xxxxxxxxx	xxxxxxxxx	9.228	5.84	25	298	(Mayer, Vaes, Hermens, 2000)	Water (Log)	dimensionless	C1=C(C(=CC(=C1Cl)Cl)Cl)C2=CC(=C(C(=C2Cl)Cl)Cl)Cl	395.33	11.658	8.27	-3.388	-3.388	1.74e-05	0.00305	-2.5157	-4.75945	94.6278	20	-114.628	-3.388	0	0	10.61	1.75	2.18
1119	PCB-180	035065-29-3	PDMS	6.13762e+09	9.788	2.51189e+06	6.4	xxxxxxxxx	xxxxxxxxx	xxxxxxxxx	xxxxxxxxx	xxxxxxxxx	9.788	6.4	25	298	(Mayer, Vaes, Hermens, 2000)	Water (Log)	dimensionless	C1=C(C(=CC(=C1Cl)Cl)Cl)C2=CC(=C(C(=C2Cl)Cl)Cl)Cl	395.33	11.658	8.27	-3.388	-3.388	1.74e-05	0.00305	-2.5157	-4.75945	94.6278	20	-114.628	-3.388	0	0	10.61	1.75	2.18
350	napthalene	000091-20-3	HDPE	1.3411e+06	6.12746	7943.28	3.9	xxxxxxxxx	xxxxxxxxx	xxxxxxxxx	xxxxxxxxx	xxxxxxxxx	5.86489	3.98989	17.55	290.55	(Mueller, Manomanii, Mortimer, MCLACHLAN, 2001)	Water (Log)	dimensionless	C1=CC=C2C=CC=CC2=C1	128.18	5.045	3.17	-1.875	-1.745	5.38	39.9	1.60097	0.730782	58.418	20	-78.418	-2.22746	0	0.17	5.33	1.02	1.09
265	acenaphthene	000083-32-9	HDPE	4.30996e+06	6.63447	21379.6	4.33	xxxxxxxxx	xxxxxxxxx	xxxxxxxxx	xxxxxxxxx	xxxxxxxxx	6.31389	4.41989	17.55	290.55	(Mueller, Manomanii, Mortimer, MCLACHLAN, 2001)	Water (Log)	dimensionless	C1CC2=CC=CC3=C2C1=CC=C3	154.21	6.044	4.15	-1.894	-2.124	0.172	1.36	0.133539	-0.764472	71.3254	20	-91.3254	-2.30447	0	0.15	6.56	0.99	1.26
309	fluorene	000086-73-7	HDPE	1.22741e+07	7.08899	12589.3	4.1	xxxxxxxxx	xxxxxxxxx	xxxxxxxxx	xxxxxxxxx	xxxxxxxxx	6.75489	4.18989	17.55	290.55	(Mueller, Manomanii, Mortimer, MCLACHLAN, 2001)	Water (Log)	dimensionless	C1C2=CC=CC=C2C3=CC=CC=C31	166.22	6.585	4.02	-2.565	-2.405	0.044	0.619	-0.208309	-1.35655	74.3323	20	-94.3323	-2.98899	0	0.19	7.04	1.13	1.36
673	Pyrene	000129-00-0	HDPE	3.6043e+08	8.55682	63095.7	4.8	xxxxxxxxx	xxxxxxxxx	xxxxxxxxx	xxxxxxxxx	xxxxxxxxx	8.15289	4.88989	17.55	290.55	(Mueller, Manomanii, Mortimer, MCLACHLAN, 2001)	Water (Log)	dimensionless	C1=CC2=C3C(=C1)C=CC4=CC=CC(=C43)C=C2	202.26	8.193	4.93	-3.263	-3.313	4.59e-05	0.0106	-1.97469	-4.33819	89.8692	20	-109.869	-3.75682	0	0.25	9.11	1.52	1.58
751	fluoranthene	000206-44-0	HDPE	1.04573e+09	9.01942	70794.6	4.85	xxxxxxxxx	xxxxxxxxx	xxxxxxxxx	xxxxxxxxx	xxxxxxxxx	8.61089	4.93989	17.55	290.55	(Mueller, Manomanii, Mortimer, MCLACHLAN, 2001)	Water (Log)	dimensionless	C1=CC=C2C(=C1)C3=CC=CC4=C3C2=CC=C4	202.26	8.601	4.93	-3.671	-3.441	0.000417	0.00811	-2.09098	-3.37986	90.892	20	-110.892	-4.16942	0	0.25	9.11	1.52	1.58
57	Benz[a]anthracene	000056-55-3	HDPE	6.78778e+09	9.83173	512861	5.71	xxxxxxxxx	xxxxxxxxx	xxxxxxxxx	xxxxxxxxx	xxxxxxxxx	9.34889	5.79989	17.55	290.55	(Mueller, Manomanii, Mortimer, MCLACHLAN, 2001)	Water (Log)	dimensionless	C1=CC=C2C(=C1)C=CC3=CC4=CC=CC=C4C=C32	228.3	9.069	5.52	-3.549	-3.309	3.62e-05	0.000107	-3.97062	-4.44129	107.425	20	-127.425	-4.12173	0	0.29	10.08	1.66	1.82
779	Chrysene	000218-01-9	HDPE	4.41552e+10	10.645	1.31826e+06	6.12	xxxxxxxxx	xxxxxxxxx	xxxxxxxxx	xxxxxxxxx	xxxxxxxxx	10.1699	6.20989	17.55	290.55	(Mueller, Manomanii, Mortimer, MCLACHLAN, 2001)	Water (Log)	dimensionless	C1=CC=C2C(=C1)C=CC3=C2C=CC4=CC=CC=C43	228.3	9.48	5.52	-3.96	-3.67	2.08e-07	0.000168	-3.77469	-6.68194	105.702	20	-125.702	-4.52498	0	0.29	10.08	1.66	1.82
351	napthalene	000091-20-3	LDPE	114146	5.05746	676.083	2.83	xxxxxxxxx	xxxxxxxxx	xxxxxxxxx	xxxxxxxxx	xxxxxxxxx	4.79489	2.91989	17.55	290.55	(Mueller, Manomanii, Mortimer, MCLACHLAN, 2001)	Water (Log)	dimensionless	C1=CC=C2C=CC=CC2=C1	128.18	5.045	3.17	-1.875	-1.745	5.38	39.9	1.60097	0.730782	58.418	20	-78.418	-2.22746	0	0.17	5.33	1.02	1.09
267	acenaphthene	000083-32-9	LDPE	1.67677e+06	6.22447	8317.64	3.92	xxxxxxxxx	xxxxxxxxx	xxxxxxxxx	xxxxxxxxx	xxxxxxxxx	5.90389	4.00989	17.55	290.55	(Mueller, Manomanii, Mortimer, MCLACHLAN, 2001)	Water (Log)	dimensionless	C1CC2=CC=CC3=C2C1=CC=C3	154.21	6.044	4.15	-1.894	-2.124	0.172	1.36	0.133539	-0.764472	71.3254	20	-91.3254	-2.30447	0	0.15	6.56	0.99	1.26
311	fluorene	000086-73-7	LDPE	4.66647e+06	6.66899	4786.3	3.68	xxxxxxxxx	xxxxxxxxx	xxxxxxxxx	xxxxxxxxx	xxxxxxxxx	6.33489	3.76989	17.55	290.55	(Mueller, Manomanii, Mortimer, MCLACHLAN, 2001)	Water (Log)	dimensionless	C1C2=CC=CC=C2C3=CC=CC=C31	166.22	6.585	4.02	-2.565	-2.405	0.044	0.619	-0.208309	-1.35655	74.3323	20	-94.3323	-2.98899	0	0.19	7.04	1.13	1.36
748	fluoranthene	000206-44-0	LDPE	4.46085e+08	8.64942	30199.5	4.48	xxxxxxxxx	xxxxxxxxx	xxxxxxxxx	xxxxxxxxx	xxxxxxxxx	8.24089	4.56989	17.55	290.55	(Mueller, Manomanii, Mortimer, MCLACHLAN, 2001)	Water (Log)	dimensionless	C1=CC=C2C(=C1)C3=CC=CC4=C3C2=CC=C4	202.26	8.601	4.93	-3.671	-3.441	0.000417	0.00811	-2.09098	-3.37986	90.892	20	-110.892	-4.16942	0	0.25	9.11	1.52	1.58
677	Pyrene	000129-00-0	LDPE	2.1718e+08	8.33682	38018.9	4.58	xxxxxxxxx	xxxxxxxxx	xxxxxxxxx	xxxxxxxxx	xxxxxxxxx	7.93289	4.66989	17.55	290.55	(Mueller, Manomanii, Mortimer, MCLACHLAN, 2001)	Water (Log)	dimensionless	C1=CC2=C3C(=C1)C=CC4=CC=CC(=C43)C=C2	202.26	8.193	4.93	-3.263	-3.313	4.59e-05	0.0106	-1.97469	-4.33819	89.8692	20	-109.869	-3.75682	0	0.25	9.11	1.52	1.58
365	o-xylene	000095-47-6	Fluting neutral sulfite semichemical pulp + 30% recycled	21	1.32222	793.067	2.89931	xxxxxxxxx	xxxxxxxxx	xxxxxxxxx	xxxxxxxxx	xxxxxxxxx	2.93839	2.19439	100	373	(Nerin and Asensio, 2004)	Air	dimensionless	CC1=CC=CC=C1C	106.17	3.834	3.09	-0.744	-0.674	908	1070	3.02938	2.95809	45.8539	20	-65.8539	1.57709	0	0.12	3.9	0.58	1
367	o-xylene	000095-47-6	Fluting neutral sulfite semichemical pulp + 30% recycled	418	2.62118	269.39	2.43038	xxxxxxxxx	xxxxxxxxx	xxxxxxxxx	xxxxxxxxx	xxxxxxxxx	3.00637	2.26237	40	313	(Nerin and Asensio, 2004)	Air	dimensionless	CC1=CC=CC=C1C	106.17	3.834	3.09	-0.744	-0.674	908	1070	3.02938	2.95809	45.8539	20	-65.8539	-0.190794	0	0.12	3.9	0.58	1
366	o-xylene	000095-47-6	Fluting neutral sulfite semichemical pulp + 30% recycled	166	2.22011	978.518	2.99057	xxxxxxxxx	xxxxxxxxx	xxxxxxxxx	xxxxxxxxx	xxxxxxxxx	3.27462	2.53062	70	343	(Nerin and Asensio, 2004)	Air	dimensionless	CC1=CC=CC=C1C	106.17	3.834	3.09	-0.744	-0.674	908	1070	3.02938	2.95809	45.8539	20	-65.8539	0.770461	0	0.12	3.9	0.58	1
344	Napthalene	000091-20-3	Fluting neutral sulfite semichemical pulp + 30% recycled	235	2.37107	199.283	2.29947	xxxxxxxxx	xxxxxxxxx	xxxxxxxxx	xxxxxxxxx	xxxxxxxxx	3.71452	1.83952	70	343	(Nerin and Asensio, 2004)	Air	dimensionless	C1=CC=C2C=CC=CC2=C1	128.18	5.045	3.17	-1.875	-1.745	5.38	39.9	1.60097	0.730782	58.418	20	-78.418	-0.0715985	0	0.17	5.33	1.02	1.09
343	Napthalene	000091-20-3	Fluting neutral sulfite semichemical pulp + 30% recycled	93	1.96848	720.127	2.85741	xxxxxxxxx	xxxxxxxxx	xxxxxxxxx	xxxxxxxxx	xxxxxxxxx	4.02749	2.15249	100	373	(Nerin and Asensio, 2004)	Air	dimensionless	C1=CC=C2C=CC=CC2=C1	128.18	5.045	3.17	-1.875	-1.745	5.38	39.9	1.60097	0.730782	58.418	20	-78.418	0.888926	0	0.17	5.33	1.02	1.09
579	Dodecane	000112-40-3	Fluting neutral sulfite semichemical pulp + 30% recycled	22	1.34242	740888	5.86975	xxxxxxxxx	xxxxxxxxx	xxxxxxxxx	xxxxxxxxx	xxxxxxxxx	2.75581	5.40981	70	343	(Nerin and Asensio, 2004)	Air	dimensionless	CCCCCCCCCCCC	170.34	3.576	6.23	2.654	2.524	31.5	18	1.25527	1.49831	61.4588	20	-81.4588	4.52733	0	0.06	5.7	0.22	1.8
578	Dodecane	000112-40-3	Fluting neutral sulfite semichemical pulp + 30% recycled	7	0.845098	2.3453e+06	6.3702	xxxxxxxxx	xxxxxxxxx	xxxxxxxxx	xxxxxxxxx	xxxxxxxxx	3.01128	5.66528	100	373	(Nerin and Asensio, 2004)	Air	dimensionless	CCCCCCCCCCCC	170.34	3.576	6.23	2.654	2.524	31.5	18	1.25527	1.49831	61.4588	20	-81.4588	5.5251	0	0.06	5.7	0.22	1.8
438	Diphenyl oxide	000101-84-8	Fluting neutral sulfite semichemical pulp + 30% recycled	197	2.29447	165.484	2.21876	xxxxxxxxx	xxxxxxxxx	xxxxxxxxx	xxxxxxxxx	xxxxxxxxx	3.86181	1.75881	70	343	(Nerin and Asensio, 2004)	Air	dimensionless	C1=CC=C(C=C1)OC2=CC=CC=C2	170.21	6.153	4.05	-2.103	-1.943	2.26	3.12	0.494155	0.354108	68.1535	20	-88.1535	-0.07571	0	0.41	6.48	1.25	1.38
437	Diphenyl oxide	000101-84-8	Fluting neutral sulfite semichemical pulp + 30% recycled	189	2.27646	1907.76	3.28052	xxxxxxxxx	xxxxxxxxx	xxxxxxxxx	xxxxxxxxx	xxxxxxxxx	4.6786	2.5756	100	373	(Nerin and Asensio, 2004)	Air	dimensionless	C1=CC=C(C=C1)OC2=CC=CC=C2	170.21	6.153	4.05	-2.103	-1.943	2.26	3.12	0.494155	0.354108	68.1535	20	-88.1535	1.00406	0	0.41	6.48	1.25	1.38
1054	2,6-Diisopropylnapthalene	024157-81-1	Fluting neutral sulfite semichemical pulp + 30% recycled	80	1.90309	1269.27	3.10355	xxxxxxxxx	xxxxxxxxx	xxxxxxxxx	xxxxxxxxx	xxxxxxxxx	3.73361	2.64361	70	343	(Nerin and Asensio, 2004)	Air	dimensionless	CC(C)C1=CC2=C(C=C1)C=C(C=C2)C(C)C	212.34	7.17	6.08	-1.09	-1.09	0.0755	0.156	-0.806875	-1.12205	79.5972	20	-99.5972	1.20046	0	0.24	8.02	0.89	1.93
1055	2,6-Diisopropylnapthalene	024157-81-1	Fluting neutral sulfite semichemical pulp + 30% recycled	132	2.12057	34752.1	4.54098	xxxxxxxxx	xxxxxxxxx	xxxxxxxxx	xxxxxxxxx	xxxxxxxxx	4.92606	3.83606	100	373	(Nerin and Asensio, 2004)	Air	dimensionless	CC(C)C1=CC2=C(C=C1)C=C(C=C2)C(C)C	212.34	7.17	6.08	-1.09	-1.09	0.0755	0.156	-0.806875	-1.12205	79.5972	20	-99.5972	2.42041	0	0.24	8.02	0.89	1.93
369	o-xylene	000095-47-6	kitchen towel	23	1.36173	14.8229	1.17093	xxxxxxxxx	xxxxxxxxx	xxxxxxxxx	xxxxxxxxx	xxxxxxxxx	1.74692	1.00292	40	313	(Nerin and Asensio, 2004)	Air	dimensionless	CC1=CC=CC=C1C	106.17	3.834	3.09	-0.744	-0.674	908	1070	3.02938	2.95809	45.8539	20	-65.8539	-0.190794	0	0.12	3.9	0.58	1
370	o-xylene	000095-47-6	kitchen towel	30	1.47712	176.841	2.24758	xxxxxxxxx	xxxxxxxxx	xxxxxxxxx	xxxxxxxxx	xxxxxxxxx	2.53164	1.78764	70	343	(Nerin and Asensio, 2004)	Air	dimensionless	CC1=CC=CC=C1C	106.17	3.834	3.09	-0.744	-0.674	908	1070	3.02938	2.95809	45.8539	20	-65.8539	0.770461	0	0.12	3.9	0.58	1
368	o-xylene	000095-47-6	kitchen towel	16	1.20412	604.241	2.78121	xxxxxxxxx	xxxxxxxxx	xxxxxxxxx	xxxxxxxxx	xxxxxxxxx	2.82029	2.07629	100	373	(Nerin and Asensio, 2004)	Air	dimensionless	CC1=CC=CC=C1C	106.17	3.834	3.09	-0.744	-0.674	908	1070	3.02938	2.95809	45.8539	20	-65.8539	1.57709	0	0.12	3.9	0.58	1
346	Napthalene	000091-20-3	kitchen towel	62	1.79239	52.5767	1.72079	xxxxxxxxx	xxxxxxxxx	xxxxxxxxx	xxxxxxxxx	xxxxxxxxx	3.13585	1.26085	70	343	(Nerin and Asensio, 2004)	Air	dimensionless	C1=CC=C2C=CC=CC2=C1	128.18	5.045	3.17	-1.875	-1.745	5.38	39.9	1.60097	0.730782	58.418	20	-78.418	-0.0715985	0	0.17	5.33	1.02	1.09
345	Napthalene	000091-20-3	kitchen towel	48	1.68124	371.679	2.57017	xxxxxxxxx	xxxxxxxxx	xxxxxxxxx	xxxxxxxxx	xxxxxxxxx	3.74025	1.86525	100	373	(Nerin and Asensio, 2004)	Air	dimensionless	C1=CC=C2C=CC=CC2=C1	128.18	5.045	3.17	-1.875	-1.745	5.38	39.9	1.60097	0.730782	58.418	20	-78.418	0.888926	0	0.17	5.33	1.02	1.09
580	Dodecane	000112-40-3	kitchen towel	4	0.60206	1.34017e+06	6.12716	xxxxxxxxx	xxxxxxxxx	xxxxxxxxx	xxxxxxxxx	xxxxxxxxx	2.76824	5.42224	100	373	(Nerin and Asensio, 2004)	Air	dimensionless	CCCCCCCCCCCC	170.34	3.576	6.23	2.654	2.524	31.5	18	1.25527	1.49831	61.4588	20	-81.4588	5.5251	0	0.06	5.7	0.22	1.8
581	Dodecane	000112-40-3	kitchen towel	43	1.63347	1.4481e+06	6.1608	xxxxxxxxx	xxxxxxxxx	xxxxxxxxx	xxxxxxxxx	xxxxxxxxx	3.04685	5.70085	70	343	(Nerin and Asensio, 2004)	Air	dimensionless	CCCCCCCCCCCC	170.34	3.576	6.23	2.654	2.524	31.5	18	1.25527	1.49831	61.4588	20	-81.4588	4.52733	0	0.06	5.7	0.22	1.8
440	Diphenyl oxide	000101-84-8	kitchen towel	80	1.90309	67.2017	1.82738	xxxxxxxxx	xxxxxxxxx	xxxxxxxxx	xxxxxxxxx	xxxxxxxxx	3.47043	1.36743	70	343	(Nerin and Asensio, 2004)	Air	dimensionless	C1=CC=C(C=C1)OC2=CC=CC=C2	170.21	6.153	4.05	-2.103	-1.943	2.26	3.12	0.494155	0.354108	68.1535	20	-88.1535	-0.07571	0	0.41	6.48	1.25	1.38
439	Diphenyl oxide	000101-84-8	kitchen towel	28	1.44716	282.631	2.45122	xxxxxxxxx	xxxxxxxxx	xxxxxxxxx	xxxxxxxxx	xxxxxxxxx	3.8493	1.7463	100	373	(Nerin and Asensio, 2004)	Air	dimensionless	C1=CC=C(C=C1)OC2=CC=CC=C2	170.21	6.153	4.05	-2.103	-1.943	2.26	3.12	0.494155	0.354108	68.1535	20	-88.1535	1.00406	0	0.41	6.48	1.25	1.38
1056	2,6-Diisopropylnapthalene	024157-81-1	kitchen towel	18	1.25527	285.586	2.45574	xxxxxxxxx	xxxxxxxxx	xxxxxxxxx	xxxxxxxxx	xxxxxxxxx	3.08579	1.99579	70	343	(Nerin and Asensio, 2004)	Air	dimensionless	CC(C)C1=CC2=C(C=C1)C=C(C=C2)C(C)C	212.34	7.17	6.08	-1.09	-1.09	0.0755	0.156	-0.806875	-1.12205	79.5972	20	-99.5972	1.20046	0	0.24	8.02	0.89	1.93
1057	2,6-Diisopropylnapthalene	024157-81-1	kitchen towel	46	1.66276	12110.6	4.08316	xxxxxxxxx	xxxxxxxxx	xxxxxxxxx	xxxxxxxxx	xxxxxxxxx	4.46824	3.37824	100	373	(Nerin and Asensio, 2004)	Air	dimensionless	CC(C)C1=CC2=C(C=C1)C=C(C=C2)C(C)C	212.34	7.17	6.08	-1.09	-1.09	0.0755	0.156	-0.806875	-1.12205	79.5972	20	-99.5972	2.42041	0	0.24	8.02	0.89	1.93
373	o-xylene	000095-47-6	Testliner: 100% recycled	213	2.32838	137.273	2.13759	xxxxxxxxx	xxxxxxxxx	xxxxxxxxx	xxxxxxxxx	xxxxxxxxx	2.71358	1.96958	40	313	(Nerin and Asensio, 2004)	Air	dimensionless	CC1=CC=CC=C1C	106.17	3.834	3.09	-0.744	-0.674	908	1070	3.02938	2.95809	45.8539	20	-65.8539	-0.190794	0	0.12	3.9	0.58	1
371	o-xylene	000095-47-6	Testliner: 100% recycled	24	1.38021	906.362	2.9573	xxxxxxxxx	xxxxxxxxx	xxxxxxxxx	xxxxxxxxx	xxxxxxxxx	2.99638	2.25238	100	373	(Nerin and Asensio, 2004)	Air	dimensionless	CC1=CC=CC=C1C	106.17	3.834	3.09	-0.744	-0.674	908	1070	3.02938	2.95809	45.8539	20	-65.8539	1.57709	0	0.12	3.9	0.58	1
372	o-xylene	000095-47-6	Testliner: 100% recycled	106	2.02531	624.837	2.79577	xxxxxxxxx	xxxxxxxxx	xxxxxxxxx	xxxxxxxxx	xxxxxxxxx	3.07982	2.33582	70	343	(Nerin and Asensio, 2004)	Air	dimensionless	CC1=CC=CC=C1C	106.17	3.834	3.09	-0.744	-0.674	908	1070	3.02938	2.95809	45.8539	20	-65.8539	0.770461	0	0.12	3.9	0.58	1
340	Napthalene	000091-20-3	Testliner: 100% recycled	359	2.55509	304.436	2.4835	xxxxxxxxx	xxxxxxxxx	xxxxxxxxx	xxxxxxxxx	xxxxxxxxx	3.89855	2.02355	70	343	(Nerin and Asensio, 2004)	Air	dimensionless	C1=CC=C2C=CC=CC2=C1	128.18	5.045	3.17	-1.875	-1.745	5.38	39.9	1.60097	0.730782	58.418	20	-78.418	-0.0715985	0	0.17	5.33	1.02	1.09
339	Napthalene	000091-20-3	Testliner: 100% recycled	190	2.27875	1471.23	3.16768	xxxxxxxxx	xxxxxxxxx	xxxxxxxxx	xxxxxxxxx	xxxxxxxxx	4.33776	2.46276	100	373	(Nerin and Asensio, 2004)	Air	dimensionless	C1=CC=C2C=CC=CC2=C1	128.18	5.045	3.17	-1.875	-1.745	5.38	39.9	1.60097	0.730782	58.418	20	-78.418	0.888926	0	0.17	5.33	1.02	1.09
576	Dodecane	000112-40-3	Testliner: 100% recycled	5	0.69897	1.67521e+06	6.22407	xxxxxxxxx	xxxxxxxxx	xxxxxxxxx	xxxxxxxxx	xxxxxxxxx	2.86515	5.51915	100	373	(Nerin and Asensio, 2004)	Air	dimensionless	CCCCCCCCCCCC	170.34	3.576	6.23	2.654	2.524	31.5	18	1.25527	1.49831	61.4588	20	-81.4588	5.5251	0	0.06	5.7	0.22	1.8
577	Dodecane	000112-40-3	Testliner: 100% recycled	3240	3.51055	1.09113e+08	8.03788	xxxxxxxxx	xxxxxxxxx	xxxxxxxxx	xxxxxxxxx	xxxxxxxxx	4.92393	7.57793	70	343	(Nerin and Asensio, 2004)	Air	dimensionless	CCCCCCCCCCCC	170.34	3.576	6.23	2.654	2.524	31.5	18	1.25527	1.49831	61.4588	20	-81.4588	4.52733	0	0.06	5.7	0.22	1.8
442	Diphenyl oxide	000101-84-8	Testliner: 100% recycled	78	1.89209	65.5216	1.81638	xxxxxxxxx	xxxxxxxxx	xxxxxxxxx	xxxxxxxxx	xxxxxxxxx	3.45944	1.35644	70	343	(Nerin and Asensio, 2004)	Air	dimensionless	C1=CC=C(C=C1)OC2=CC=CC=C2	170.21	6.153	4.05	-2.103	-1.943	2.26	3.12	0.494155	0.354108	68.1535	20	-88.1535	-0.07571	0	0.41	6.48	1.25	1.38
441	Diphenyl oxide	000101-84-8	Testliner: 100% recycled	54	1.73239	545.074	2.73646	xxxxxxxxx	xxxxxxxxx	xxxxxxxxx	xxxxxxxxx	xxxxxxxxx	4.13453	2.03153	100	373	(Nerin and Asensio, 2004)	Air	dimensionless	C1=CC=C(C=C1)OC2=CC=CC=C2	170.21	6.153	4.05	-2.103	-1.943	2.26	3.12	0.494155	0.354108	68.1535	20	-88.1535	1.00406	0	0.41	6.48	1.25	1.38
1058	2,6-Diisopropylnapthalene	024157-81-1	Testliner: 100% recycled	20	1.30103	5265.47	3.72144	xxxxxxxxx	xxxxxxxxx	xxxxxxxxx	xxxxxxxxx	xxxxxxxxx	4.10652	3.01652	100	373	(Nerin and Asensio, 2004)	Air	dimensionless	CC(C)C1=CC2=C(C=C1)C=C(C=C2)C(C)C	212.34	7.17	6.08	-1.09	-1.09	0.0755	0.156	-0.806875	-1.12205	79.5972	20	-99.5972	2.42041	0	0.24	8.02	0.89	1.93
609	Anthracene	000120-12-7	PDMS	7.29458e+06	6.863	13182.6	4.12	xxxxxxxxx	xxxxxxxxx	xxxxxxxxx	xxxxxxxxx	xxxxxxxxx	6.863	4.12	25	298	(Ouyang , Cai, Zhang, Li, Pawliszyn, 2007)	Water (Log)	dimensionless	C1=CC=C2C=C3C=CC=CC3=CC2=C1	178.24	7.093	4.35	-2.743	-2.643	0.000289	0.0659	-1.18111	-3.5391	82.8889	20	-102.889	-2.743	0	0.23	7.71	1.34	1.45
684	Pyrene	000129-00-0	PDMS	4.60257e+07	7.663	25118.9	4.4	xxxxxxxxx	xxxxxxxxx	xxxxxxxxx	xxxxxxxxx	xxxxxxxxx	7.663	4.4	25	298	(Ouyang , Cai, Zhang, Li, Pawliszyn, 2007)	Water (Log)	dimensionless	C1=CC2=C3C(=C1)C=CC4=CC=CC(=C43)C=C2	202.26	8.193	4.93	-3.263	-3.313	4.59e-05	0.0106	-1.97469	-4.33819	89.8692	20	-109.869	-3.263	0	0.25	9.11	1.52	1.58
355	napthalene	000091-20-3	PDMS fiber coating	164059	5.215	2187.76	3.34	xxxxxxxxx	xxxxxxxxx	xxxxxxxxx	xxxxxxxxx	xxxxxxxxx	5.215	3.34	25	298	(Ouyang , Cai, Zhang, Li, Pawliszyn, 2007)	Water (Log)	dimensionless	C1=CC=C2C=CC=CC2=C1	128.18	5.045	3.17	-1.875	-1.745	5.38	39.9	1.60097	0.730782	58.418	20	-78.418	-1.875	0	0.17	5.33	1.02	1.09
270	acenaphthene	000083-32-9	PDMS fiber coating	271644	5.434	3467.37	3.54	xxxxxxxxx	xxxxxxxxx	xxxxxxxxx	xxxxxxxxx	xxxxxxxxx	5.434	3.54	25	298	(Ouyang , Cai, Zhang, Li, Pawliszyn, 2007)	Water (Log)	dimensionless	C1CC2=CC=CC3=C2C1=CC=C3	154.21	6.044	4.15	-1.894	-2.124	0.172	1.36	0.133539	-0.764472	71.3254	20	-91.3254	-1.894	0	0.15	6.56	0.99	1.26
314	fluorene	000086-73-7	PDMS fiber coating	1.64059e+06	6.215	4466.84	3.65	xxxxxxxxx	xxxxxxxxx	xxxxxxxxx	xxxxxxxxx	xxxxxxxxx	6.215	3.65	25	298	(Ouyang , Cai, Zhang, Li, Pawliszyn, 2007)	Water (Log)	dimensionless	C1C2=CC=CC=C2C3=CC=CC=C31	166.22	6.585	4.02	-2.565	-2.405	0.044	0.619	-0.208309	-1.35655	74.3323	20	-94.3323	-2.565	0	0.19	7.04	1.13	1.36
611	Anthracene	000120-12-7	PDMS fiber coating	7.29458e+06	6.863	13182.6	4.12	xxxxxxxxx	xxxxxxxxx	xxxxxxxxx	xxxxxxxxx	xxxxxxxxx	6.863	4.12	25	298	(Ouyang , Cai, Zhang, Li, Pawliszyn, 2007)	Water (Log)	dimensionless	C1=CC=C2C=C3C=CC=CC3=CC2=C1	178.24	7.093	4.35	-2.743	-2.643	0.000289	0.0659	-1.18111	-3.5391	82.8889	20	-102.889	-2.743	0	0.23	7.71	1.34	1.45
688	Pyrene	000129-00-0	PDMS fiber coating	4.60257e+07	7.663	25118.9	4.4	xxxxxxxxx	xxxxxxxxx	xxxxxxxxx	xxxxxxxxx	xxxxxxxxx	7.663	4.4	25	298	(Ouyang , Cai, Zhang, Li, Pawliszyn, 2007)	Water (Log)	dimensionless	C1=CC2=C3C(=C1)C=CC4=CC=CC(=C43)C=C2	202.26	8.193	4.93	-3.263	-3.313	4.59e-05	0.0106	-1.97469	-4.33819	89.8692	20	-109.869	-3.263	0	0.25	9.11	1.52	1.58
416	Styrene	000100-42-5	Crystaline PS	0.00629128	-2.20126	8e-05	-4.09691	xxxxxxxxx	xxxxxxxxx	xxxxxxxxx	xxxxxxxxx	xxxxxxxxx	-2.82213	-3.83113	4	277	(Piringer and Baner, 2008)	Water	dimensionless	C=CC1=CC=CC=C1	104.15	3.899	2.89	-1.009	-0.949	674	853	2.93095	2.82866	46.7197	20	-66.7197	-1.89565	0	0.17	3.86	0.7	0.96
415	Styrene	000100-42-5	Crystaline PS	0.00258642	-2.5873	0.00016	-3.79588	xxxxxxxxx	xxxxxxxxx	xxxxxxxxx	xxxxxxxxx	xxxxxxxxx	-2.72705	-3.73605	20	293	(Piringer and Baner, 2008)	Water	dimensionless	C=CC1=CC=CC=C1	104.15	3.899	2.89	-1.009	-0.949	674	853	2.93095	2.82866	46.7197	20	-66.7197	-1.20858	0	0.17	3.86	0.7	0.96
414	Styrene	000100-42-5	Crystaline PS	0.000926905	-3.03296	0.00033	-3.48149	xxxxxxxxx	xxxxxxxxx	xxxxxxxxx	xxxxxxxxx	xxxxxxxxx	-2.6405	-3.6495	40	313	(Piringer and Baner, 2008)	Water	dimensionless	C=CC1=CC=CC=C1	104.15	3.899	2.89	-1.009	-0.949	674	853	2.93095	2.82866	46.7197	20	-66.7197	-0.448521	0	0.17	3.86	0.7	0.96
1139	2-Methylbutyrate	035915-22-1	E-P PP	899086	5.9538	31	1.49136	xxxxxxxxx	xxxxxxxxx	xxxxxxxxx	xxxxxxxxx	xxxxxxxxx	5.71369	1.57569	18	291	(Piringer and Baner, 2008)	Water	dimensionless	CC(C)CC(=O)O	102.13	5.628	1.49	-4.138	-4.468	152	58.7	1.76864	2.18184	56.9433	20	-76.9433	-4.46244	0.57	0.39	3.22	0.61	0.89
1015	Limonene	005989-27-5	E-P PP	22439.4	4.35101	40800	4.61066	xxxxxxxxx	xxxxxxxxx	xxxxxxxxx	xxxxxxxxx	xxxxxxxxx	4.12999	4.69499	18	291	(Piringer and Baner, 2008)	Water	dimensionless	CC1=CCC(CC1)C(=C)C	136.24	4.265	4.83	0.565	0.115	193	192	2.2833	2.28556	52.4164	20	-72.4164	0.259649	0	0.2	4.54	0.32	1.32
654	Octanal	000124-13-0	E-P PP	8416.13	3.92511	87	1.93952	xxxxxxxxx	xxxxxxxxx	xxxxxxxxx	xxxxxxxxx	xxxxxxxxx	3.70085	2.02385	18	291	(Piringer and Baner, 2008)	Water	dimensionless	CCCCCCCC=O	128.22	4.457	2.78	-1.677	-1.677	199	157	2.1959	2.29885	53.1851	20	-73.1851	-1.98559	0	0.34	4.56	0.75	1.25
243	Linalool(nonan-2-one)	000078-70-6	E-P PP	10669.9	4.02816	11	1.04139	xxxxxxxxx	xxxxxxxxx	xxxxxxxxx	xxxxxxxxx	xxxxxxxxx	3.77172	1.12572	18	291	(Piringer and Baner, 2008)	Water	dimensionless	CC(=CCCC(C)(C=C)O)C	154.25	6.026	3.38	-2.646	-3.056	11.1	21.3	1.32838	1.04532	60.8157	20	-80.8157	-2.98677	0.31	0.5	5.01	0.51	1.49
1011	Neral	005392-40-5	E-P PP	6124.72	3.78709	42	1.62325	xxxxxxxxx	xxxxxxxxx	xxxxxxxxx	xxxxxxxxx	xxxxxxxxx	3.52058	1.70758	18	291	(Piringer and Baner, 2008)	Water	dimensionless	CC(=CCCC(=CC=O)C)C	152.24	5.263	3.45	-1.813	-1.813	12.2	11.4	1.0569	1.08636	63.2036	20	-83.2036	-2.16384	0	0.5	5.26	0.84	1.45
464	Gernial	000106-26-3	E-P PP	6708.02	3.82659	46	1.66276	xxxxxxxxx	xxxxxxxxx	xxxxxxxxx	xxxxxxxxx	xxxxxxxxx	3.56009	1.74709	18	291	(Piringer and Baner, 2008)	Water	dimensionless	CC(=CCCC(=CC=O)C)C	152.24	5.263	3.45	-1.813	-1.813	12.2	11.4	1.0569	1.08636	63.2036	20	-83.2036	-2.16384	0	0.5	5.26	0.84	1.45
699	Gernial	000141-27-5	E-P PP	6708.02	3.82659	46	1.66276	xxxxxxxxx	xxxxxxxxx	xxxxxxxxx	xxxxxxxxx	xxxxxxxxx	3.56009	1.74709	18	291	(Piringer and Baner, 2008)	Water	dimensionless	CC(=CCCC(=CC=O)C)C	152.24	5.263	3.45	-1.813	-1.813	12.2	11.4	1.0569	1.08636	63.2036	20	-83.2036	-2.16384	0	0.5	5.26	0.84	1.45
572	Decanal	000112-31-2	E-P PP	45088.2	4.65406	1490	3.17319	xxxxxxxxx	xxxxxxxxx	xxxxxxxxx	xxxxxxxxx	xxxxxxxxx	4.39052	3.25752	18	291	(Piringer and Baner, 2008)	Water	dimensionless	CCCCCCCCCC=O	156.27	4.893	3.76	-1.133	-1.133	31.4	13.7	1.13672	1.49693	62.5015	20	-82.5015	-1.48088	0	0.34	5.55	0.76	1.53
629	isopentanol	000123-51-3	LDPE	826.326	2.91715	0.6	-0.221849	xxxxxxxxx	xxxxxxxxx	xxxxxxxxx	xxxxxxxxx	xxxxxxxxx	2.91715	-0.221849	25	298	(Piringer and Baner, 2008)	Water	dimensionless	CC(C)CCO	88.15	4.399	1.26	-3.139	-3.239	512	316	2.49969	2.70927	50.5131	20	-70.5131	-3.139	0.31	0.34	2.96	0.44	0.87
458	ethyl butyrate	000105-54-4	LDPE	140.841	2.14873	2.3	0.361728	xxxxxxxxx	xxxxxxxxx	xxxxxxxxx	xxxxxxxxx	xxxxxxxxx	2.14873	0.361728	25	298	(Piringer and Baner, 2008)	Water	dimensionless	CCCC(=O)OCC	116.16	3.637	1.85	-1.787	-1.787	1950	1710	3.233	3.29003	44.063	20	-64.063	-1.787	0	0.37	3.34	0.59	1.03
635	Butyl acetate	000123-86-4	LDPE	185.328	2.26794	2.5	0.39794	xxxxxxxxx	xxxxxxxxx	xxxxxxxxx	xxxxxxxxx	xxxxxxxxx	2.26794	0.39794	25	298	(Piringer and Baner, 2008)	Water	dimensionless	CCCCOC(=O)C	116.16	3.72	1.85	-1.87	-1.94	1590	1530	3.18469	3.2014	44.4879	20	-64.4879	-1.87	0	0.37	3.34	0.59	1.03
882	cis-3-hexenol	000623-37-0	LDPE	191.791	2.28283	0.33	-0.481486	xxxxxxxxx	xxxxxxxxx	xxxxxxxxx	xxxxxxxxx	xxxxxxxxx	2.2262	-0.457798	23	296	(Piringer and Baner, 2008)	Water	dimensionless	CCCC(CC)O	102.18	4.434	1.75	-2.684	-2.784	419	641	2.80686	2.62221	47.8112	20	-67.8112	-2.76432	0.31	0.35	3.46	0.45	1.01
1019	trans-2-hexanal	006728-26-3	LDPE	5800.4	3.76346	11.6	1.06446	xxxxxxxxx	xxxxxxxxx	xxxxxxxxx	xxxxxxxxx	xxxxxxxxx	3.76346	1.06446	25	298	(Piringer and Baner, 2008)	Water	dimensionless	CCCC=CC=O	98.15	4.279	1.58	-2.699	-2.699	629	576	2.76042	2.79865	48.2197	20	-68.2197	-2.699	0	0.39	3.56	0.84	0.93
136	Hexanal	000066-25-1	LDPE	405.697	2.6082	3.7	0.568202	xxxxxxxxx	xxxxxxxxx	xxxxxxxxx	xxxxxxxxx	xxxxxxxxx	2.6082	0.568202	25	298	(Piringer and Baner, 2008)	Water	dimensionless	CCCCCC=O	100.16	3.84	1.8	-2.04	-2.06	1280	1510	3.17898	3.10721	44.5381	20	-64.5381	-2.04	0	0.33	3.57	0.74	0.97
645	Isopentyl acetate	000123-92-2	LDPE	215.912	2.33428	5.3	0.724276	xxxxxxxxx	xxxxxxxxx	xxxxxxxxx	xxxxxxxxx	xxxxxxxxx	2.33428	0.724276	25	298	(Piringer and Baner, 2008)	Water	dimensionless	CC(C)CCOC(=O)C	130.19	3.87	2.26	-1.61	-1.62	756	747	2.87332	2.87852	47.2266	20	-67.2266	-1.61	0	0.4	3.72	0.58	1.17
1032	Ethyl-2-methyl butyrate	007452-79-1	LDPE	287.197	2.45818	6.4	0.80618	xxxxxxxxx	xxxxxxxxx	xxxxxxxxx	xxxxxxxxx	xxxxxxxxx	2.45818	0.80618	25	298	(Piringer and Baner, 2008)	Water	dimensionless	CCC(C)C(=O)OCC	130.19	3.912	2.26	-1.652	-1.652	1070	988	2.99476	3.02938	46.1585	20	-66.1585	-1.652	0	0.4	3.72	0.58	1.17
644	Isoamylacetate	000123-92-2	LDPE	440.418	2.64387	9	0.954243	xxxxxxxxx	xxxxxxxxx	xxxxxxxxx	xxxxxxxxx	xxxxxxxxx	2.58793	0.97793	23	296	(Piringer and Baner, 2008)	Water	dimensionless	CC(C)CCOC(=O)C	130.19	3.87	2.26	-1.61	-1.62	756	747	2.87332	2.87852	47.2266	20	-67.2266	-1.68962	0	0.4	3.72	0.58	1.17
858	Butyl propanoate	000590-01-2	LDPE	338.921	2.5301	7	0.845098	xxxxxxxxx	xxxxxxxxx	xxxxxxxxx	xxxxxxxxx	xxxxxxxxx	2.5301	0.845098	25	298	(Piringer and Baner, 2008)	Water	dimensionless	CCCCOC(=O)CC	130.19	4.025	2.34	-1.685	-1.685	620	589	2.77012	2.79239	48.1344	20	-68.1344	-1.685	0	0.37	3.84	0.59	1.17
561	n-heptanol	000111-70-6	LDPE	5273.64	3.72211	1.6	0.20412	xxxxxxxxx	xxxxxxxxx	xxxxxxxxx	xxxxxxxxx	xxxxxxxxx	3.65181	0.227808	23	296	(Piringer and Baner, 2008)	Water	dimensionless	CCCCCCCO	116.21	5.734	2.31	-3.424	-3.114	39.8	31.2	1.49415	1.59988	59.3576	20	-79.3576	-3.51799	0.31	0.32	4.07	0.47	1.15
707	Hexyl acetate	000142-92-7	LDPE	1144.07	3.05845	24.8	1.39445	xxxxxxxxx	xxxxxxxxx	xxxxxxxxx	xxxxxxxxx	xxxxxxxxx	3.05845	1.39445	25	298	(Piringer and Baner, 2008)	Water	dimensionless	CCCCCCOC(=O)C	144.22	4.494	2.83	-1.664	-1.664	194	176	2.24551	2.2878	52.7488	20	-72.7488	-1.664	0	0.38	4.33	0.6	1.31
453	hexanol	000104-76-7	LDPE	369.029	2.56706	0.4	-0.39794	xxxxxxxxx	xxxxxxxxx	xxxxxxxxx	xxxxxxxxx	xxxxxxxxx	2.56706	-0.39794	25	298	(Piringer and Baner, 2008)	Water	dimensionless	CCCCC(CC)CO	130.23	5.695	2.73	-2.965	-2.965	24.6	18.1	1.25768	1.39094	61.4376	20	-81.4376	-2.965	0.31	0.35	4.45	0.46	1.29
1016	Limonene	005989-27-5	LDPE	1758.11	3.24505	5300	3.72428	xxxxxxxxx	xxxxxxxxx	xxxxxxxxx	xxxxxxxxx	xxxxxxxxx	3.18296	3.74796	23	296	(Piringer and Baner, 2008)	Water	dimensionless	CC1=CCC(CC1)C(=C)C	136.24	4.265	4.83	0.565	0.115	193	192	2.2833	2.28556	52.4164	20	-72.4164	0.47923	0	0.2	4.54	0.32	1.32
111	2-Phenylethylalcohol	000060-12-8	LDPE	28070.5	4.44825	0.38	-0.420216	xxxxxxxxx	xxxxxxxxx	xxxxxxxxx	xxxxxxxxx	xxxxxxxxx	4.37347	-0.396529	23	296	(Piringer and Baner, 2008)	Water	dimensionless	C1=CC=C(C=C1)CCO	122.17	6.34	1.57	-4.77	-4.98	3.24	11.6	1.06446	0.510545	63.1372	20	-83.1372	-4.86847	0.31	0.4	4.77	0.91	1.06
230	Camphor	000076-22-2	LDPE	38730	4.58805	211	2.32428	xxxxxxxxx	xxxxxxxxx	xxxxxxxxx	xxxxxxxxx	xxxxxxxxx	4.52797	2.34797	23	296	(Piringer and Baner, 2008)	Water	dimensionless	CC1(C2CCC1(C(=O)C2)C)C	152.24	5.22	3.04	-2.18	-2.48	1.42	299	2.47567	0.152288	50.7243	20	-70.7243	-2.26377	0	0.41	5.21	0.73	1.32
463	Citronellol	000106-22-9	LDPE	25571.8	4.40776	21	1.32222	xxxxxxxxx	xxxxxxxxx	xxxxxxxxx	xxxxxxxxx	xxxxxxxxx	4.32991	1.34591	23	296	(Piringer and Baner, 2008)	Water	dimensionless	CC(CCC=C(C)C)CCO	156.27	6.544	3.56	-2.984	-2.634	2.26	5.88	0.769377	0.354108	65.7327	20	-85.7327	-3.08554	0.31	0.44	5.29	0.51	1.53
331	Menthol	000089-78-1	LDPE	27132.8	4.43349	21	1.32222	xxxxxxxxx	xxxxxxxxx	xxxxxxxxx	xxxxxxxxx	xxxxxxxxx	4.36291	1.34591	23	296	(Piringer and Baner, 2008)	Water	dimensionless	CC1CCC(C(C1)O)C(C)C	156.27	6.397	3.38	-3.017	-3.207	1.02	29.3	1.46687	0.00860017	59.5976	20	-79.5976	-3.11127	0.31	0.42	5.38	0.5	1.47
435	Dimethylbenzylcarbinol	000100-86-7	LDPE	61062.4	4.78577	1	0	xxxxxxxxx	xxxxxxxxx	xxxxxxxxx	xxxxxxxxx	xxxxxxxxx	4.70569	0.0236879	23	296	(Piringer and Baner, 2008)	Water	dimensionless	CC(C)(CC1=CC=CC=C1)O	150.22	7.122	2.44	-4.682	-4.682	3.94	3.59	0.555094	0.595496	67.6175	20	-87.6175	-4.78577	0.31	0.44	5.42	0.85	1.34
396	Eugenol	000097-53-0	LDPE	27135.7	4.43354	5	0.69897	xxxxxxxxx	xxxxxxxxx	xxxxxxxxx	xxxxxxxxx	xxxxxxxxx	4.35266	0.722658	23	296	(Piringer and Baner, 2008)	Water	dimensionless	COC1=C(C=CC(=C1)CC=C)O	164.21	6.36	2.73	-3.63	-4.09	1.26	3.01	0.478566	0.100371	68.2906	20	-88.2906	-3.73457	0.27	0.53	5.95	0.97	1.35
443	Diphenyloxide	000101-84-8	LDPE	230539	5.36274	1430	3.15534	xxxxxxxxx	xxxxxxxxx	xxxxxxxxx	xxxxxxxxx	xxxxxxxxx	5.28202	3.17902	23	296	(Piringer and Baner, 2008)	Water	dimensionless	C1=CC=C(C=C1)OC2=CC=CC=C2	170.21	6.153	4.05	-2.103	-1.943	2.26	3.12	0.494155	0.354108	68.1535	20	-88.1535	-2.20741	0	0.41	6.48	1.25	1.38
436	Diphenylmethane	000101-81-5	LDPE	916157	5.96197	2850	3.45484	xxxxxxxxx	xxxxxxxxx	xxxxxxxxx	xxxxxxxxx	xxxxxxxxx	5.87653	3.47853	23	296	(Piringer and Baner, 2008)	Water	dimensionless	C1=CC=C(C=C1)CC2=CC=CC=C2	168.24	6.418	4.02	-2.398	-2.278	1.63	1.1	0.0413927	0.212188	72.1359	20	-92.1359	-2.50713	0	0.21	6.6	1.1	1.47
452	Gamma-undelactone	000104-67-6	LDPE	1487.2	3.17237	35	1.54407	xxxxxxxxx	xxxxxxxxx	xxxxxxxxx	xxxxxxxxx	xxxxxxxxx	3.08376	1.56776	23	296	(Piringer and Baner, 2008)	Water	dimensionless	CCCCCCCC1CCC(=O)O1	184.28	4.576	3.06	-1.516	-1.516	0.545	0.545	-0.263603	-0.263603	74.8186	20	-94.8186	-1.6283	0	0.51	6.7	1.41	1.62
69	Meperidene	000057-42-1	LDPE	1.44235e+06	6.15907	5.83	0.765669	xxxxxxxxx	xxxxxxxxx	xxxxxxxxx	xxxxxxxxx	xxxxxxxxx	6.72596	0.62996	37	310	(Piringer and Baner, 2008)	Water	dimensionless	CCOC(=O)C1(CCN(CC1)C)C2=CC=CC=C2	247.34	9.126	3.03	-6.096	-6.406	0.000112	0.0555	-1.25571	-3.95078	83.545	20	-103.545	-5.3934	0	0.97	8.35	1.26	2.05
126	Androst-4-ene3,17-dione	000063-05-8	LDPE	258098	5.41178	2.3	0.361728	xxxxxxxxx	xxxxxxxxx	xxxxxxxxx	xxxxxxxxx	xxxxxxxxx	6.03902	0.226019	37	310	(Piringer and Baner, 2008)	Water	dimensionless	CC12CCC(=O)C=C1CCC3C2CCC4(C3CCC4=O)C	286.42	8.573	2.76	-5.813	-5.823	0.000236	0.00541	-2.2668	-3.62709	92.4385	20	-112.439	-5.05006	0	1.01	11.16	2.5	2.34
89	Testosterone	000058-22-0	LDPE	2.0269e+06	6.30683	2	0.30103	xxxxxxxxx	xxxxxxxxx	xxxxxxxxx	xxxxxxxxx	xxxxxxxxx	7.05632	0.165321	37	310	(Piringer and Baner, 2008)	Water	dimensionless	CC12CCC3C(C1CCC2O)CCC4=CC(=O)CCC34C	288.43	10.161	3.27	-6.891	-6.841	2.27e-06	4.84e-05	-4.31515	-5.64397	110.456	20	-130.456	-6.0058	0.31	1.01	11.18	2.27	2.38
662	L-methadone	000125-58-6	LDPE	2.40507e+09	9.38113	524	2.71933	xxxxxxxxx	xxxxxxxxx	xxxxxxxxx	xxxxxxxxx	xxxxxxxxx	10.0356	2.58362	37	310	(Piringer and Baner, 2008)	Water	dimensionless	CCC(=O)C(CC(C)N(C)C)(C1=CC=CC=C1)C2=CC=CC=C2	309.46	11.622	4.17	-7.452	-7.692	0.000149	0.00189	-2.72354	-3.82681	96.4559	20	-116.456	-6.6618	0	1.09	11.22	1.72	2.71
837	L-a-Acetyl methadol	000509-74-0	LDPE	3.13516e+07	7.49626	208	2.31806	xxxxxxxxx	xxxxxxxxx	xxxxxxxxx	xxxxxxxxx	xxxxxxxxx	8.17935	2.18235	37	310	(Piringer and Baner, 2008)	Water	dimensionless	CCC(C(CC(C)N(C)C)(C1=CC=CC=C1)C2=CC=CC=C2)OC(=O)C	353.51	11.167	5.17	-5.997	-6.897	4.06e-05	0.000627	-3.20273	-4.39147	100.671	20	-120.671	-5.1782	0	1.15	12	1.62	3.05
81	Progesterone	000057-83-0	LDPE	5.22623e+06	6.71819	52.3	1.7185	xxxxxxxxx	xxxxxxxxx	xxxxxxxxx	xxxxxxxxx	xxxxxxxxx	7.35879	1.58279	37	310	(Piringer and Baner, 2008)	Water	dimensionless	CC(=O)C1CCC2C1(CCC3C2CCC4=CC(=O)CCC34C)C	314.47	9.446	3.67	-5.776	-5.576	0.000359	0.00323	-2.4908	-3.44491	94.4087	20	-114.409	-4.99969	0	1.04	12.04	2.49	2.62
630	isopentanol	000123-51-3	LLDPE	550.884	2.74106	0.4	-0.39794	xxxxxxxxx	xxxxxxxxx	xxxxxxxxx	xxxxxxxxx	xxxxxxxxx	2.74106	-0.39794	25	298	(Piringer and Baner, 2008)	Water	dimensionless	CC(C)CCO	88.15	4.399	1.26	-3.139	-3.239	512	316	2.49969	2.70927	50.5131	20	-70.5131	-3.139	0.31	0.34	2.96	0.44	0.87
459	ethyl butyrate	000105-54-4	LLDPE	97.9761	1.99112	1.6	0.20412	xxxxxxxxx	xxxxxxxxx	xxxxxxxxx	xxxxxxxxx	xxxxxxxxx	1.99112	0.20412	25	298	(Piringer and Baner, 2008)	Water	dimensionless	CCCC(=O)OCC	116.16	3.637	1.85	-1.787	-1.787	1950	1710	3.233	3.29003	44.063	20	-64.063	-1.787	0	0.37	3.34	0.59	1.03
636	Butyl acetate	000123-86-4	LLDPE	126.023	2.10045	1.7	0.230449	xxxxxxxxx	xxxxxxxxx	xxxxxxxxx	xxxxxxxxx	xxxxxxxxx	2.10045	0.230449	25	298	(Piringer and Baner, 2008)	Water	dimensionless	CCCCOC(=O)C	116.16	3.72	1.85	-1.87	-1.94	1590	1530	3.18469	3.2014	44.4879	20	-64.4879	-1.87	0	0.37	3.34	0.59	1.03
460	ethyl butyrate	000105-54-4	LLDPE	262.749	2.41954	2.76	0.440909	xxxxxxxxx	xxxxxxxxx	xxxxxxxxx	xxxxxxxxx	xxxxxxxxx	2.28774	0.500735	20	293	(Piringer and Baner, 2008)	Water	dimensionless	CCCC(=O)OCC	116.16	3.637	1.85	-1.787	-1.787	1950	1710	3.233	3.29003	44.063	20	-64.063	-1.97863	0	0.37	3.34	0.59	1.03
1020	trans-2-hexanal	006728-26-3	LLDPE	5900.41	3.77088	11.8	1.07188	xxxxxxxxx	xxxxxxxxx	xxxxxxxxx	xxxxxxxxx	xxxxxxxxx	3.77088	1.07188	25	298	(Piringer and Baner, 2008)	Water	dimensionless	CCCC=CC=O	98.15	4.279	1.58	-2.699	-2.699	629	576	2.76042	2.79865	48.2197	20	-68.2197	-2.699	0	0.39	3.56	0.84	0.93
137	Hexanal	000066-25-1	LLDPE	164.472	2.21609	1.5	0.176091	xxxxxxxxx	xxxxxxxxx	xxxxxxxxx	xxxxxxxxx	xxxxxxxxx	2.21609	0.176091	25	298	(Piringer and Baner, 2008)	Water	dimensionless	CCCCCC=O	100.16	3.84	1.8	-2.04	-2.06	1280	1510	3.17898	3.10721	44.5381	20	-64.5381	-2.04	0	0.33	3.57	0.74	0.97
646	Isopentyl acetate	000123-92-2	LLDPE	146.657	2.1663	3.6	0.556303	xxxxxxxxx	xxxxxxxxx	xxxxxxxxx	xxxxxxxxx	xxxxxxxxx	2.1663	0.556303	25	298	(Piringer and Baner, 2008)	Water	dimensionless	CC(C)CCOC(=O)C	130.19	3.87	2.26	-1.61	-1.62	756	747	2.87332	2.87852	47.2266	20	-67.2266	-1.61	0	0.4	3.72	0.58	1.17
1033	Ethyl-2-methyl butyrate	007452-79-1	LLDPE	233.348	2.368	5.2	0.716003	xxxxxxxxx	xxxxxxxxx	xxxxxxxxx	xxxxxxxxx	xxxxxxxxx	2.368	0.716003	25	298	(Piringer and Baner, 2008)	Water	dimensionless	CCC(C)C(=O)OCC	130.19	3.912	2.26	-1.652	-1.652	1070	988	2.99476	3.02938	46.1585	20	-66.1585	-1.652	0	0.4	3.72	0.58	1.17
859	Butyl propanoate	000590-01-2	LLDPE	203.352	2.30825	4.2	0.623249	xxxxxxxxx	xxxxxxxxx	xxxxxxxxx	xxxxxxxxx	xxxxxxxxx	2.30825	0.623249	25	298	(Piringer and Baner, 2008)	Water	dimensionless	CCCCOC(=O)CC	130.19	4.025	2.34	-1.685	-1.685	620	589	2.77012	2.79239	48.1344	20	-68.1344	-1.685	0	0.37	3.84	0.59	1.17
633	Ethyl hexanoate	000123-66-0	LLDPE	8.3216	0.920207	0.15	-0.823909	xxxxxxxxx	xxxxxxxxx	xxxxxxxxx	xxxxxxxxx	xxxxxxxxx	0.764917	-0.764083	20	293	(Piringer and Baner, 2008)	Water	dimensionless	CCCCCC(=O)OCC	144.22	4.359	2.83	-1.529	-1.529	240	219	2.34044	2.38021	51.9137	20	-71.9137	-1.74412	0	0.38	4.33	0.6	1.31
708	Hexyl acetate	000142-92-7	LLDPE	876.503	2.94275	19	1.27875	xxxxxxxxx	xxxxxxxxx	xxxxxxxxx	xxxxxxxxx	xxxxxxxxx	2.94275	1.27875	25	298	(Piringer and Baner, 2008)	Water	dimensionless	CCCCCCOC(=O)C	144.22	4.494	2.83	-1.664	-1.664	194	176	2.24551	2.2878	52.7488	20	-72.7488	-1.664	0	0.38	4.33	0.6	1.31
454	hexanol	000104-76-7	LLDPE	276.771	2.44212	0.3	-0.522879	xxxxxxxxx	xxxxxxxxx	xxxxxxxxx	xxxxxxxxx	xxxxxxxxx	2.44212	-0.522879	25	298	(Piringer and Baner, 2008)	Water	dimensionless	CCCCC(CC)CO	130.23	5.695	2.73	-2.965	-2.965	24.6	18.1	1.25768	1.39094	61.4376	20	-81.4376	-2.965	0.31	0.35	4.45	0.46	1.29
455	hexanol	000104-76-7	LLDPE	5835.95	3.76611	3.61	0.557507	xxxxxxxxx	xxxxxxxxx	xxxxxxxxx	xxxxxxxxx	xxxxxxxxx	3.58233	0.617333	20	293	(Piringer and Baner, 2008)	Water	dimensionless	CCCCC(CC)CO	130.23	5.695	2.73	-2.965	-2.965	24.6	18.1	1.25768	1.39094	61.4376	20	-81.4376	-3.2086	0.31	0.35	4.45	0.46	1.29
570	n-octanol	000111-87-5	LLDPE	274.611	2.43872	0.1	-1	xxxxxxxxx	xxxxxxxxx	xxxxxxxxx	xxxxxxxxx	xxxxxxxxx	2.24883	-0.940174	20	293	(Piringer and Baner, 2008)	Water	dimensionless	CCCCCCCCO	130.23	5.999	2.81	-3.189	-2.999	13.2	10.6	1.02531	1.12057	63.4815	20	-83.4815	-3.43872	0.31	0.32	4.56	0.47	1.29
465	Ethyl octanoate	000106-32-1	LLDPE	58.7179	1.76877	1.76	0.245513	xxxxxxxxx	xxxxxxxxx	xxxxxxxxx	xxxxxxxxx	xxxxxxxxx	1.59034	0.305339	20	293	(Piringer and Baner, 2008)	Water	dimensionless	CCCCCCCC(=O)OCC	172.27	5.095	3.81	-1.285	-1.285	31.4	28.9	1.4609	1.49693	59.6501	20	-79.6501	-1.52326	0	0.38	5.32	0.6	1.59
571	n-decanol	000112-30-1	LLDPE	1214.58	3.08443	0.14	-0.853872	xxxxxxxxx	xxxxxxxxx	xxxxxxxxx	xxxxxxxxx	xxxxxxxxx	2.86895	-0.794046	20	293	(Piringer and Baner, 2008)	Water	dimensionless	CCCCCCCCCCO	158.29	7.453	3.79	-3.663	-2.883	1.45	1.13	0.0530784	0.161368	72.0331	20	-92.0331	-3.9383	0.31	0.33	5.55	0.48	1.58
1063	n-dodecanol	027342-88-7	LLDPE	7984.86	3.90227	1.58	0.198657	xxxxxxxxx	xxxxxxxxx	xxxxxxxxx	xxxxxxxxx	xxxxxxxxx	3.66048	0.258483	20	293	(Piringer and Baner, 2008)	Water	dimensionless	CCCCCCCCCCCCO	186.34	8.172	4.77	-3.402	-3.042	0.242	0.113	-0.946922	-0.616185	80.829	20	-100.829	-3.70361	0.31	0.34	6.54	0.49	1.86
631	isopentanol	000123-51-3	Nylon 6 (Nylon)	413.163	2.61612	0.3	-0.522879	xxxxxxxxx	xxxxxxxxx	xxxxxxxxx	xxxxxxxxx	xxxxxxxxx	2.61612	-0.522879	25	298	(Piringer and Baner, 2008)	Water	dimensionless	CC(C)CCO	88.15	4.399	1.26	-3.139	-3.239	512	316	2.49969	2.70927	50.5131	20	-70.5131	-3.139	0.31	0.34	2.96	0.44	0.87
461	ethyl butyrate	000105-54-4	Nylon 6 (Nylon)	30.6175	1.48597	0.5	-0.30103	xxxxxxxxx	xxxxxxxxx	xxxxxxxxx	xxxxxxxxx	xxxxxxxxx	1.48597	-0.30103	25	298	(Piringer and Baner, 2008)	Water	dimensionless	CCCC(=O)OCC	116.16	3.637	1.85	-1.787	-1.787	1950	1710	3.233	3.29003	44.063	20	-64.063	-1.787	0	0.37	3.34	0.59	1.03
637	Butyl acetate	000123-86-4	Nylon 6 (Nylon)	44.4786	1.64815	0.6	-0.221849	xxxxxxxxx	xxxxxxxxx	xxxxxxxxx	xxxxxxxxx	xxxxxxxxx	1.64815	-0.221849	25	298	(Piringer and Baner, 2008)	Water	dimensionless	CCCCOC(=O)C	116.16	3.72	1.85	-1.87	-1.94	1590	1530	3.18469	3.2014	44.4879	20	-64.4879	-1.87	0	0.37	3.34	0.59	1.03
1021	trans-2-hexanal	006728-26-3	Nylon 6 (Nylon)	500.035	2.699	1	0	xxxxxxxxx	xxxxxxxxx	xxxxxxxxx	xxxxxxxxx	xxxxxxxxx	2.699	0	25	298	(Piringer and Baner, 2008)	Water	dimensionless	CCCC=CC=O	98.15	4.279	1.58	-2.699	-2.699	629	576	2.76042	2.79865	48.2197	20	-68.2197	-2.699	0	0.39	3.56	0.84	0.93
138	hexanal	000066-25-1	Nylon 6 (Nylon)	175.437	2.24412	1.6	0.20412	xxxxxxxxx	xxxxxxxxx	xxxxxxxxx	xxxxxxxxx	xxxxxxxxx	2.24412	0.20412	25	298	(Piringer and Baner, 2008)	Water	dimensionless	CCCCCC=O	100.16	3.84	1.8	-2.04	-2.06	1280	1510	3.17898	3.10721	44.5381	20	-64.5381	-2.04	0	0.33	3.57	0.74	0.97
1034	Ethyl-2-methyl butyrate	007452-79-1	Nylon 6 (Nylon)	22.4373	1.35097	0.5	-0.30103	xxxxxxxxx	xxxxxxxxx	xxxxxxxxx	xxxxxxxxx	xxxxxxxxx	1.35097	-0.30103	25	298	(Piringer and Baner, 2008)	Water	dimensionless	CCC(C)C(=O)OCC	130.19	3.912	2.26	-1.652	-1.652	1070	988	2.99476	3.02938	46.1585	20	-66.1585	-1.652	0	0.4	3.72	0.58	1.17
647	Isopentyl acetate	000123-92-2	Nylon 6 (Nylon)	24.4428	1.38815	0.6	-0.221849	xxxxxxxxx	xxxxxxxxx	xxxxxxxxx	xxxxxxxxx	xxxxxxxxx	1.38815	-0.221849	25	298	(Piringer and Baner, 2008)	Water	dimensionless	CC(C)CCOC(=O)C	130.19	3.87	2.26	-1.61	-1.62	756	747	2.87332	2.87852	47.2266	20	-67.2266	-1.61	0	0.4	3.72	0.58	1.17
860	Butyl propanoate	000590-01-2	Nylon 6 (Nylon)	53.259	1.72639	1.1	0.0413927	xxxxxxxxx	xxxxxxxxx	xxxxxxxxx	xxxxxxxxx	xxxxxxxxx	1.72639	0.0413927	25	298	(Piringer and Baner, 2008)	Water	dimensionless	CCCCOC(=O)CC	130.19	4.025	2.34	-1.685	-1.685	620	589	2.77012	2.79239	48.1344	20	-68.1344	-1.685	0	0.37	3.84	0.59	1.17
709	Hexyl acetate	000142-92-7	Nylon 6 (Nylon)	92.2635	1.96503	2	0.30103	xxxxxxxxx	xxxxxxxxx	xxxxxxxxx	xxxxxxxxx	xxxxxxxxx	1.96503	0.30103	25	298	(Piringer and Baner, 2008)	Water	dimensionless	CCCCCCOC(=O)C	144.22	4.494	2.83	-1.664	-1.664	194	176	2.24551	2.2878	52.7488	20	-72.7488	-1.664	0	0.38	4.33	0.6	1.31
456	hexanol	000104-76-7	Nylon 6 (Nylon)	738.057	2.86809	0.8	-0.09691	xxxxxxxxx	xxxxxxxxx	xxxxxxxxx	xxxxxxxxx	xxxxxxxxx	2.86809	-0.09691	25	298	(Piringer and Baner, 2008)	Water	dimensionless	CCCCC(CC)CO	130.23	5.695	2.73	-2.965	-2.965	24.6	18.1	1.25768	1.39094	61.4376	20	-81.4376	-2.965	0.31	0.35	4.45	0.46	1.29
70	Meperidene	000057-42-1	PDMS	4.15634e+06	6.61871	16.8	1.22531	xxxxxxxxx	xxxxxxxxx	xxxxxxxxx	xxxxxxxxx	xxxxxxxxx	7.1856	1.0896	37	310	(Piringer and Baner, 2008)	Water	dimensionless	CCOC(=O)C1(CCN(CC1)C)C2=CC=CC=C2	247.34	9.126	3.03	-6.096	-6.406	0.000112	0.0555	-1.25571	-3.95078	83.545	20	-103.545	-5.3934	0	0.97	8.35	1.26	2.05
74	Amobarbital	000057-43-2	PDMS	3.14047e+08	8.49699	0.0936	-1.02872	xxxxxxxxx	xxxxxxxxx	xxxxxxxxx	xxxxxxxxx	xxxxxxxxx	9.36757	-1.16443	37	310	(Piringer and Baner, 2008)	Water	dimensionless	CCC1(C(=O)NC(=O)NC1=O)CCC(C)C	226.28	12.532	2	-10.532	-10.462	2.02e-08	4.53e-07	-6.3439	-7.69465	128.3	20	-148.3	-9.52572	0.52	1.24	9.97	1.35	1.8
128	Androst-4-ene3,17-dione	000063-05-8	PDMS	1.2456e+06	6.09538	11.1	1.04532	xxxxxxxxx	xxxxxxxxx	xxxxxxxxx	xxxxxxxxx	xxxxxxxxx	6.72261	0.909614	37	310	(Piringer and Baner, 2008)	Water	dimensionless	CC12CCC(=O)C=C1CCC3C2CCC4(C3CCC4=O)C	286.42	8.573	2.76	-5.813	-5.823	0.000236	0.00541	-2.2668	-3.62709	92.4385	20	-112.439	-5.05006	0	1.01	11.16	2.5	2.34
91	Testosterone	000058-22-0	PDMS	5.03685e+07	7.70216	49.7	1.69636	xxxxxxxxx	xxxxxxxxx	xxxxxxxxx	xxxxxxxxx	xxxxxxxxx	8.45165	1.56065	37	310	(Piringer and Baner, 2008)	Water	dimensionless	CC12CCC3C(C1CCC2O)CCC4=CC(=O)CCC34C	288.43	10.161	3.27	-6.891	-6.841	2.27e-06	4.84e-05	-4.31515	-5.64397	110.456	20	-130.456	-6.0058	0.31	1.01	11.18	2.27	2.38
663	L-methadone	000125-58-6	PDMS	8.81247e+09	9.9451	1920	3.2833	xxxxxxxxx	xxxxxxxxx	xxxxxxxxx	xxxxxxxxx	xxxxxxxxx	10.5996	3.14759	37	310	(Piringer and Baner, 2008)	Water	dimensionless	CCC(=O)C(CC(C)N(C)C)(C1=CC=CC=C1)C2=CC=CC=C2	309.46	11.622	4.17	-7.452	-7.692	0.000149	0.00189	-2.72354	-3.82681	96.4559	20	-116.456	-6.6618	0	1.09	11.22	1.72	2.71
239	Codeine	000076-57-3	PDMS	1.51467e+09	9.18032	0.0472	-1.32606	xxxxxxxxx	xxxxxxxxx	xxxxxxxxx	xxxxxxxxx	xxxxxxxxx	9.95723	-1.46177	37	310	(Piringer and Baner, 2008)	Water	dimensionless	CN1CCC23C4C1CC5=C2C(=C(C=C5)OC)OC3C(C=C4)O	299.37	12.699	1.28	-11.419	-11.509	2.55e-08	1.68e-05	-4.77469	-7.59346	114.498	20	-134.498	-10.5064	0.23	1.58	11.64	1.92	2.21
82	Progesterone	000057-83-0	PDMS	1.32904e+07	7.12354	133	2.12385	xxxxxxxxx	xxxxxxxxx	xxxxxxxxx	xxxxxxxxx	xxxxxxxxx	7.76414	1.98814	37	310	(Piringer and Baner, 2008)	Water	dimensionless	CC(=O)C1CCC2C1(CCC3C2CCC4=CC(=O)CCC34C)C	314.47	9.446	3.67	-5.776	-5.576	0.000359	0.00323	-2.4908	-3.44491	94.4087	20	-114.409	-4.99969	0	1.04	12.04	2.49	2.62
832	Naltrexone	000465-65-6	PDMS	1.43788e+16	16.1577	0.236	-0.627088	xxxxxxxxx	xxxxxxxxx	xxxxxxxxx	xxxxxxxxx	xxxxxxxxx	17.0352	-0.762797	37	310	(Piringer and Baner, 2008)	Water	dimensionless	C=CCN1CCC23C4C(=O)CCC2(C1CC5=C3C(=C(C=C5)O)O4)O	327.38	18.748	0.95	-17.798	-16.658	5.67e-09	3.47e-07	-6.45967	-8.24642	129.318	20	-149.318	-16.7848	0.5	1.75	12.67	2.02	2.36
2	Corticosterone	000050-22-6	PDMS	2.88101e+06	6.45955	0.569	-0.244888	xxxxxxxxx	xxxxxxxxx	xxxxxxxxx	xxxxxxxxx	xxxxxxxxx	7.3894	-0.380596	37	310	(Piringer and Baner, 2008)	Water	dimensionless	CC12CCC(=O)C=C1CCC3C2C(CC4(C3CCC4C(=O)CO)C)O	346.47	9.76	1.99	-7.77	-7.82	1.09e-09	4.6e-08	-7.33724	-8.96257	137.037	20	-157.037	-6.70443	0.48	1.62	12.97	2.8	2.74
632	isopentanol	000123-51-3	PET	413.163	2.61612	0.3	-0.522879	xxxxxxxxx	xxxxxxxxx	xxxxxxxxx	xxxxxxxxx	xxxxxxxxx	2.61612	-0.522879	25	298	(Piringer and Baner, 2008)	Water	dimensionless	CC(C)CCO	88.15	4.399	1.26	-3.139	-3.239	512	316	2.49969	2.70927	50.5131	20	-70.5131	-3.139	0.31	0.34	2.96	0.44	0.87
462	ethyl butyrate	000105-54-4	PET	36.741	1.56515	0.6	-0.221849	xxxxxxxxx	xxxxxxxxx	xxxxxxxxx	xxxxxxxxx	xxxxxxxxx	1.56515	-0.221849	25	298	(Piringer and Baner, 2008)	Water	dimensionless	CCCC(=O)OCC	116.16	3.637	1.85	-1.787	-1.787	1950	1710	3.233	3.29003	44.063	20	-64.063	-1.787	0	0.37	3.34	0.59	1.03
638	Butyl acetate	000123-86-4	PET	51.8917	1.7151	0.7	-0.154902	xxxxxxxxx	xxxxxxxxx	xxxxxxxxx	xxxxxxxxx	xxxxxxxxx	1.7151	-0.154902	25	298	(Piringer and Baner, 2008)	Water	dimensionless	CCCCOC(=O)C	116.16	3.72	1.85	-1.87	-1.94	1590	1530	3.18469	3.2014	44.4879	20	-64.4879	-1.87	0	0.37	3.34	0.59	1.03
1022	trans-2-hexanal	006728-26-3	PET	450.031	2.65324	0.9	-0.0457575	xxxxxxxxx	xxxxxxxxx	xxxxxxxxx	xxxxxxxxx	xxxxxxxxx	2.65324	-0.0457575	25	298	(Piringer and Baner, 2008)	Water	dimensionless	CCCC=CC=O	98.15	4.279	1.58	-2.699	-2.699	629	576	2.76042	2.79865	48.2197	20	-68.2197	-2.699	0	0.39	3.56	0.84	0.93
139	Hexanal	000066-25-1	PET	120.613	2.08139	1.1	0.0413927	xxxxxxxxx	xxxxxxxxx	xxxxxxxxx	xxxxxxxxx	xxxxxxxxx	2.08139	0.0413927	25	298	(Piringer and Baner, 2008)	Water	dimensionless	CCCCCC=O	100.16	3.84	1.8	-2.04	-2.06	1280	1510	3.17898	3.10721	44.5381	20	-64.5381	-2.04	0	0.33	3.57	0.74	0.97
1035	Ethyl-2-methyl butyrate	007452-79-1	PET	13.4624	1.12912	0.3	-0.522879	xxxxxxxxx	xxxxxxxxx	xxxxxxxxx	xxxxxxxxx	xxxxxxxxx	1.12912	-0.522879	25	298	(Piringer and Baner, 2008)	Water	dimensionless	CCC(C)C(=O)OCC	130.19	3.912	2.26	-1.652	-1.652	1070	988	2.99476	3.02938	46.1585	20	-66.1585	-1.652	0	0.4	3.72	0.58	1.17
648	Isopentyl acetate	000123-92-2	PET	20.369	1.30897	0.5	-0.30103	xxxxxxxxx	xxxxxxxxx	xxxxxxxxx	xxxxxxxxx	xxxxxxxxx	1.30897	-0.30103	25	298	(Piringer and Baner, 2008)	Water	dimensionless	CC(C)CCOC(=O)C	130.19	3.87	2.26	-1.61	-1.62	756	747	2.87332	2.87852	47.2266	20	-67.2266	-1.61	0	0.4	3.72	0.58	1.17
861	Butyl propanoate	000590-01-2	PET	62.9424	1.79894	1.3	0.113943	xxxxxxxxx	xxxxxxxxx	xxxxxxxxx	xxxxxxxxx	xxxxxxxxx	1.79894	0.113943	25	298	(Piringer and Baner, 2008)	Water	dimensionless	CCCCOC(=O)CC	130.19	4.025	2.34	-1.685	-1.685	620	589	2.77012	2.79239	48.1344	20	-68.1344	-1.685	0	0.37	3.84	0.59	1.17
710	Hexyl acetate	000142-92-7	PET	175.301	2.24378	3.8	0.579784	xxxxxxxxx	xxxxxxxxx	xxxxxxxxx	xxxxxxxxx	xxxxxxxxx	2.24378	0.579784	25	298	(Piringer and Baner, 2008)	Water	dimensionless	CCCCCCOC(=O)C	144.22	4.494	2.83	-1.664	-1.664	194	176	2.24551	2.2878	52.7488	20	-72.7488	-1.664	0	0.38	4.33	0.6	1.31
457	hexanol	000104-76-7	PET	276.771	2.44212	0.3	-0.522879	xxxxxxxxx	xxxxxxxxx	xxxxxxxxx	xxxxxxxxx	xxxxxxxxx	2.44212	-0.522879	25	298	(Piringer and Baner, 2008)	Water	dimensionless	CCCCC(CC)CO	130.23	5.695	2.73	-2.965	-2.965	24.6	18.1	1.25768	1.39094	61.4376	20	-81.4376	-2.965	0.31	0.35	4.45	0.46	1.29
6	Hydrocortisone	000050-23-7	Poly 2-hdroxyethylmethacrylate	794181	5.89992	27	1.43136	xxxxxxxxx	xxxxxxxxx	xxxxxxxxx	xxxxxxxxx	xxxxxxxxx	6.91266	1.29566	37	310	(Piringer and Baner, 2008)	Water	dimensionless	CC12CCC(=O)C=C1CCC3C2C(CC4(C3CCC4(C(=O)CO)O)C)O	362.47	7.237	1.62	-5.617	-5.627	1.62e-11	1.88e-09	-8.72584	-10.7905	149.251	20	-169.251	-4.46856	0.73	1.9	13.28	2.92	2.8
127	Androst-4-ene3,17-dione	000063-05-8	Poly 2-hydroxyethylmethacrylate	7.03596e+06	6.84732	62.7	1.79727	xxxxxxxxx	xxxxxxxxx	xxxxxxxxx	xxxxxxxxx	xxxxxxxxx	7.47456	1.66156	37	310	(Piringer and Baner, 2008)	Water	dimensionless	CC12CCC(=O)C=C1CCC3C2CCC4(C3CCC4=O)C	286.42	8.573	2.76	-5.813	-5.823	0.000236	0.00541	-2.2668	-3.62709	92.4385	20	-112.439	-5.05006	0	1.01	11.16	2.5	2.34
7	3,17 ?ý- Estradiol	000050-28-2	Poly 2-hydroxyethylmethacrylate	1.77926e+10	10.2502	177	2.24797	xxxxxxxxx	xxxxxxxxx	xxxxxxxxx	xxxxxxxxx	xxxxxxxxx	11.0093	2.11226	37	310	(Piringer and Baner, 2008)	Water	dimensionless	CC12CCC3C(C1CCC2O)CCC4=C3C=CC(=C4)O	272.39	12.837	3.94	-8.897	-8.827	2.65e-07	3.35e-05	-4.47496	-6.57675	111.861	20	-131.861	-8.00226	0.81	0.95	11.17	2.3	2.2
90	Testosterone	000058-22-0	Poly 2-hydroxyethylmethacrylate	7.87451e+07	7.89622	77.7	1.89042	xxxxxxxxx	xxxxxxxxx	xxxxxxxxx	xxxxxxxxx	xxxxxxxxx	8.64571	1.75471	37	310	(Piringer and Baner, 2008)	Water	dimensionless	CC12CCC3C(C1CCC2O)CCC4=CC(=O)CCC34C	288.43	10.161	3.27	-6.891	-6.841	2.27e-06	4.84e-05	-4.31515	-5.64397	110.456	20	-130.456	-6.0058	0.31	1.01	11.18	2.27	2.38
151	Norethindrone	000068-22-4	Poly 2-hydroxyethylmethacrylate	3.52404e+08	8.54704	70	1.8451	xxxxxxxxx	xxxxxxxxx	xxxxxxxxx	xxxxxxxxx	xxxxxxxxx	9.31439	1.70939	37	310	(Piringer and Baner, 2008)	Water	dimensionless	CC12CCC3C(C1CCC2(C#C)O)CCC4=CC(=O)CCC34	298.43	10.595	2.99	-7.605	-7.625	3.14e-07	2.43e-05	-4.61439	-6.50307	113.088	20	-133.088	-6.70194	0.4	1.07	11.54	2.44	2.44
238	Codeine	000076-57-3	Poly 2-hydroxyethylmethacrylate	3.81876e+11	11.5819	11.9	1.07555	xxxxxxxxx	xxxxxxxxx	xxxxxxxxx	xxxxxxxxx	xxxxxxxxx	12.3588	0.939838	37	310	(Piringer and Baner, 2008)	Water	dimensionless	CN1CCC23C4C1CC5=C2C(=C(C=C5)OC)OC3C(C=C4)O	299.37	12.699	1.28	-11.419	-11.509	2.55e-08	1.68e-05	-4.77469	-7.59346	114.498	20	-134.498	-10.5064	0.23	1.58	11.64	1.92	2.21
152	17-a-hydroxyprogesterone	000068-96-2	Poly 2-hydroxyethylmethacrylate	2.8025e+07	7.44755	83	1.91908	xxxxxxxxx	xxxxxxxxx	xxxxxxxxx	xxxxxxxxx	xxxxxxxxx	8.25737	1.78337	37	310	(Piringer and Baner, 2008)	Water	dimensionless	CC(=O)C1(CCC2C1(CCC3C2CCC4=CC(=O)CCC34C)C)O	330.47	9.554	3.08	-6.474	-6.384	3.69e-08	4.72e-06	-5.32606	-7.43297	119.347	20	-139.347	-5.52847	0.17	1.32	12.03	2.5	2.68
86	Progesterone	000057-83-0	Poly 2-hydroxyethylmethacrylate	1.28907e+07	7.11028	129	2.11059	xxxxxxxxx	xxxxxxxxx	xxxxxxxxx	xxxxxxxxx	xxxxxxxxx	7.75088	1.97488	37	310	(Piringer and Baner, 2008)	Water	dimensionless	CC(=O)C1CCC2C1(CCC3C2CCC4=CC(=O)CCC34C)C	314.47	9.446	3.67	-5.776	-5.576	0.000359	0.00323	-2.4908	-3.44491	94.4087	20	-114.409	-4.99969	0	1.04	12.04	2.49	2.62
831	Naltrexone	000465-65-6	Poly 2-hydroxyethylmethacrylate	1.55364e+18	18.1913	25.5	1.40654	xxxxxxxxx	xxxxxxxxx	xxxxxxxxx	xxxxxxxxx	xxxxxxxxx	19.0688	1.27083	37	310	(Piringer and Baner, 2008)	Water	dimensionless	C=CCN1CCC23C4C(=O)CCC2(C1CC5=C3C(=C(C=C5)O)O4)O	327.38	18.748	0.95	-17.798	-16.658	5.67e-09	3.47e-07	-6.45967	-8.24642	129.318	20	-149.318	-16.7848	0.5	1.75	12.67	2.02	2.36
71	Meperidene	000057-42-1	Poly-e-caprolactam-co-w-caprolatone(40/60) (Nylon)	3.46362e+07	7.53953	140	2.14613	xxxxxxxxx	xxxxxxxxx	xxxxxxxxx	xxxxxxxxx	xxxxxxxxx	8.10642	2.01042	37	310	(Piringer and Baner, 2008)	Water	dimensionless	CCOC(=O)C1(CCN(CC1)C)C2=CC=CC=C2	247.34	9.126	3.03	-6.096	-6.406	0.000112	0.0555	-1.25571	-3.95078	83.545	20	-103.545	-5.3934	0	0.97	8.35	1.26	2.05
75	Amobarbital	000057-43-2	Poly-e-caprolactam-co-w-caprolatone(40/60) (Nylon)	3.27468e+11	11.5152	97.6	1.98945	xxxxxxxxx	xxxxxxxxx	xxxxxxxxx	xxxxxxxxx	xxxxxxxxx	12.3857	1.85374	37	310	(Piringer and Baner, 2008)	Water	dimensionless	CCC1(C(=O)NC(=O)NC1=O)CCC(C)C	226.28	12.532	2	-10.532	-10.462	2.02e-08	4.53e-07	-6.3439	-7.69465	128.3	20	-148.3	-9.52572	0.52	1.24	9.97	1.35	1.8
129	Androst-4-ene3,17-dione	000063-05-8	Poly-e-caprolactam-co-w-caprolatone(40/60) (Nylon)	2.58098e+07	7.41178	230	2.36173	xxxxxxxxx	xxxxxxxxx	xxxxxxxxx	xxxxxxxxx	xxxxxxxxx	8.03902	2.22602	37	310	(Piringer and Baner, 2008)	Water	dimensionless	CC12CCC(=O)C=C1CCC3C2CCC4(C3CCC4=O)C	286.42	8.573	2.76	-5.813	-5.823	0.000236	0.00541	-2.2668	-3.62709	92.4385	20	-112.439	-5.05006	0	1.01	11.16	2.5	2.34
92	Testosterone	000058-22-0	Poly-e-caprolactam-co-w-caprolatone(40/60) (Nylon)	4.96591e+08	8.696	490	2.6902	xxxxxxxxx	xxxxxxxxx	xxxxxxxxx	xxxxxxxxx	xxxxxxxxx	9.44549	2.55449	37	310	(Piringer and Baner, 2008)	Water	dimensionless	CC12CCC3C(C1CCC2O)CCC4=CC(=O)CCC34C	288.43	10.161	3.27	-6.891	-6.841	2.27e-06	4.84e-05	-4.31515	-5.64397	110.456	20	-130.456	-6.0058	0.31	1.01	11.18	2.27	2.38
664	L-methadone	000125-58-6	Poly-e-caprolactam-co-w-caprolatone(40/60) (Nylon)	3.6076e+10	10.5572	7860	3.89542	xxxxxxxxx	xxxxxxxxx	xxxxxxxxx	xxxxxxxxx	xxxxxxxxx	11.2117	3.75971	37	310	(Piringer and Baner, 2008)	Water	dimensionless	CCC(=O)C(CC(C)N(C)C)(C1=CC=CC=C1)C2=CC=CC=C2	309.46	11.622	4.17	-7.452	-7.692	0.000149	0.00189	-2.72354	-3.82681	96.4559	20	-116.456	-6.6618	0	1.09	11.22	1.72	2.71
240	Codeine	000076-57-3	Poly-e-caprolactam-co-w-caprolatone(40/60) (Nylon)	8.3756e+11	11.923	26.1	1.41664	xxxxxxxxx	xxxxxxxxx	xxxxxxxxx	xxxxxxxxx	xxxxxxxxx	12.6999	1.28093	37	310	(Piringer and Baner, 2008)	Water	dimensionless	CN1CCC23C4C1CC5=C2C(=C(C=C5)OC)OC3C(C=C4)O	299.37	12.699	1.28	-11.419	-11.509	2.55e-08	1.68e-05	-4.77469	-7.59346	114.498	20	-134.498	-10.5064	0.23	1.58	11.64	1.92	2.21
83	Progesterone	000057-83-0	Poly-e-caprolactam-co-w-caprolatone(40/60) (Nylon)	1.64881e+08	8.21717	1650	3.21748	xxxxxxxxx	xxxxxxxxx	xxxxxxxxx	xxxxxxxxx	xxxxxxxxx	8.85778	3.08178	37	310	(Piringer and Baner, 2008)	Water	dimensionless	CC(=O)C1CCC2C1(CCC3C2CCC4=CC(=O)CCC34C)C	314.47	9.446	3.67	-5.776	-5.576	0.000359	0.00323	-2.4908	-3.44491	94.4087	20	-114.409	-4.99969	0	1.04	12.04	2.49	2.62
833	Naltrexone	000465-65-6	Poly-e-caprolactam-co-w-caprolatone(40/60) (Nylon)	5.37376e+18	18.7303	88.2	1.94547	xxxxxxxxx	xxxxxxxxx	xxxxxxxxx	xxxxxxxxx	xxxxxxxxx	19.6078	1.80976	37	310	(Piringer and Baner, 2008)	Water	dimensionless	C=CCN1CCC23C4C(=O)CCC2(C1CC5=C3C(=C(C=C5)O)O4)O	327.38	18.748	0.95	-17.798	-16.658	5.67e-09	3.47e-07	-6.45967	-8.24642	129.318	20	-149.318	-16.7848	0.5	1.75	12.67	2.02	2.36
3	Corticosterone	000050-22-6	Poly-e-caprolactam-co-w-caprolatone(40/60) (Nylon)	3.84304e+08	8.58467	75.9	1.88024	xxxxxxxxx	xxxxxxxxx	xxxxxxxxx	xxxxxxxxx	xxxxxxxxx	9.51453	1.74453	37	310	(Piringer and Baner, 2008)	Water	dimensionless	CC12CCC(=O)C=C1CCC3C2C(CC4(C3CCC4C(=O)CO)C)O	346.47	9.76	1.99	-7.77	-7.82	1.09e-09	4.6e-08	-7.33724	-8.96257	137.037	20	-157.037	-6.70443	0.48	1.62	12.97	2.8	2.74
35	Cortisone	000053-06-5	Poly-e-caprolactam-co-w-caprolatone(40/60) (Nylon)	5.42969e+07	7.73478	37.9	1.57864	xxxxxxxxx	xxxxxxxxx	xxxxxxxxx	xxxxxxxxx	xxxxxxxxx	8.71093	1.44293	37	310	(Piringer and Baner, 2008)	Water	dimensionless	CC12CCC(=O)C=C1CCC3C2C(=O)CC4(C3CCC4(C(=O)CO)O)C	360.45	9.078	1.81	-7.268	-7.608	6.02e-11	7.71e-09	-8.11295	-10.2204	143.86	20	-163.86	-6.15614	0.41	1.9	13.26	3.15	2.75
72	Meperidene	000057-42-1	Poly-E-caprolactone (Nylon)	1.1999e+07	7.07914	48.5	1.68574	xxxxxxxxx	xxxxxxxxx	xxxxxxxxx	xxxxxxxxx	xxxxxxxxx	7.64603	1.55003	37	310	(Piringer and Baner, 2008)	Water	dimensionless	CCOC(=O)C1(CCN(CC1)C)C2=CC=CC=C2	247.34	9.126	3.03	-6.096	-6.406	0.000112	0.0555	-1.25571	-3.95078	83.545	20	-103.545	-5.3934	0	0.97	8.35	1.26	2.05
76	Amobarbital	000057-43-2	Poly-E-caprolactone (Nylon)	9.22682e+10	10.9651	27.5	1.43933	xxxxxxxxx	xxxxxxxxx	xxxxxxxxx	xxxxxxxxx	xxxxxxxxx	11.8356	1.30362	37	310	(Piringer and Baner, 2008)	Water	dimensionless	CCC1(C(=O)NC(=O)NC1=O)CCC(C)C	226.28	12.532	2	-10.532	-10.462	2.02e-08	4.53e-07	-6.3439	-7.69465	128.3	20	-148.3	-9.52572	0.52	1.24	9.97	1.35	1.8
130	Androst-4-ene3,17-dione	000063-05-8	Poly-E-caprolactone (Nylon)	1.00882e+07	7.00382	89.9	1.95376	xxxxxxxxx	xxxxxxxxx	xxxxxxxxx	xxxxxxxxx	xxxxxxxxx	7.63105	1.81805	37	310	(Piringer and Baner, 2008)	Water	dimensionless	CC12CCC(=O)C=C1CCC3C2CCC4(C3CCC4=O)C	286.42	8.573	2.76	-5.813	-5.823	0.000236	0.00541	-2.2668	-3.62709	92.4385	20	-112.439	-5.05006	0	1.01	11.16	2.5	2.34
93	Testosterone	000058-22-0	Poly-E-caprolactone (Nylon)	1.36816e+08	8.13614	135	2.13033	xxxxxxxxx	xxxxxxxxx	xxxxxxxxx	xxxxxxxxx	xxxxxxxxx	8.88563	1.99463	37	310	(Piringer and Baner, 2008)	Water	dimensionless	CC12CCC3C(C1CCC2O)CCC4=CC(=O)CCC34C	288.43	10.161	3.27	-6.891	-6.841	2.27e-06	4.84e-05	-4.31515	-5.64397	110.456	20	-130.456	-6.0058	0.31	1.01	11.18	2.27	2.38
665	L-methadone	000125-58-6	Poly-E-caprolactone (Nylon)	2.00116e+10	10.3013	4360	3.63949	xxxxxxxxx	xxxxxxxxx	xxxxxxxxx	xxxxxxxxx	xxxxxxxxx	10.9558	3.50378	37	310	(Piringer and Baner, 2008)	Water	dimensionless	CCC(=O)C(CC(C)N(C)C)(C1=CC=CC=C1)C2=CC=CC=C2	309.46	11.622	4.17	-7.452	-7.692	0.000149	0.00189	-2.72354	-3.82681	96.4559	20	-116.456	-6.6618	0	1.09	11.22	1.72	2.71
241	Codeine	000076-57-3	Poly-E-caprolactone (Nylon)	1.04615e+11	11.0196	3.26	0.513218	xxxxxxxxx	xxxxxxxxx	xxxxxxxxx	xxxxxxxxx	xxxxxxxxx	11.7965	0.377509	37	310	(Piringer and Baner, 2008)	Water	dimensionless	CN1CCC23C4C1CC5=C2C(=C(C=C5)OC)OC3C(C=C4)O	299.37	12.699	1.28	-11.419	-11.509	2.55e-08	1.68e-05	-4.77469	-7.59346	114.498	20	-134.498	-10.5064	0.23	1.58	11.64	1.92	2.21
84	Progesterone	000057-83-0	Poly-E-caprolactone (Nylon)	1.2491e+08	8.0966	1250	3.09691	xxxxxxxxx	xxxxxxxxx	xxxxxxxxx	xxxxxxxxx	xxxxxxxxx	8.7372	2.9612	37	310	(Piringer and Baner, 2008)	Water	dimensionless	CC(=O)C1CCC2C1(CCC3C2CCC4=CC(=O)CCC34C)C	314.47	9.446	3.67	-5.776	-5.576	0.000359	0.00323	-2.4908	-3.44491	94.4087	20	-114.409	-4.99969	0	1.04	12.04	2.49	2.62
1234	3-ketodesogestrel	054048-10-1	Poly-E-caprolactone (Nylon)	1.31907e+08	8.12027	226	2.35411	xxxxxxxxx	xxxxxxxxx	xxxxxxxxx	xxxxxxxxx	xxxxxxxxx	8.9234	2.2184	37	310	(Piringer and Baner, 2008)	Water	dimensionless	CCC12CC(=C)C3C(C1CCC2(C#C)O)CCC4=CC(=O)CCC34	324.47	10.595	3.89	-6.705	-7.435	1.68e-07	6.11e-06	-5.21396	-6.77469	118.361	20	-138.361	-5.76616	0.4	1.14	12.33	2.45	2.68
834	Naltrexone	000465-65-6	Poly-E-caprolactone (Nylon)	2.3396e+18	18.3691	38.4	1.58433	xxxxxxxxx	xxxxxxxxx	xxxxxxxxx	xxxxxxxxx	xxxxxxxxx	19.2466	1.44862	37	310	(Piringer and Baner, 2008)	Water	dimensionless	C=CCN1CCC23C4C(=O)CCC2(C1CC5=C3C(=C(C=C5)O)O4)O	327.38	18.748	0.95	-17.798	-16.658	5.67e-09	3.47e-07	-6.45967	-8.24642	129.318	20	-149.318	-16.7848	0.5	1.75	12.67	2.02	2.36
4	Corticosterone	000050-22-6	Poly-E-caprolactone (Nylon)	1.07848e+08	8.03281	21.3	1.32838	xxxxxxxxx	xxxxxxxxx	xxxxxxxxx	xxxxxxxxx	xxxxxxxxx	8.96267	1.19267	37	310	(Piringer and Baner, 2008)	Water	dimensionless	CC12CCC(=O)C=C1CCC3C2C(CC4(C3CCC4C(=O)CO)C)O	346.47	9.76	1.99	-7.77	-7.82	1.09e-09	4.6e-08	-7.33724	-8.96257	137.037	20	-157.037	-6.70443	0.48	1.62	12.97	2.8	2.74
36	Cortisone	000053-06-5	Poly-E-caprolactone (Nylon)	9.82788e+06	6.99246	6.86	0.836324	xxxxxxxxx	xxxxxxxxx	xxxxxxxxx	xxxxxxxxx	xxxxxxxxx	7.96862	0.700615	37	310	(Piringer and Baner, 2008)	Water	dimensionless	CC12CCC(=O)C=C1CCC3C2C(=O)CC4(C3CCC4(C(=O)CO)O)C	360.45	9.078	1.81	-7.268	-7.608	6.02e-11	7.71e-09	-8.11295	-10.2204	143.86	20	-163.86	-6.15614	0.41	1.9	13.26	3.15	2.75
73	Meperidene	000057-42-1	Polyethylene-co-vinylacetate	2.36268e+07	7.37341	95.5	1.98	xxxxxxxxx	xxxxxxxxx	xxxxxxxxx	xxxxxxxxx	xxxxxxxxx	7.94029	1.84429	37	310	(Piringer and Baner, 2008)	Water	dimensionless	CCOC(=O)C1(CCN(CC1)C)C2=CC=CC=C2	247.34	9.126	3.03	-6.096	-6.406	0.000112	0.0555	-1.25571	-3.95078	83.545	20	-103.545	-5.3934	0	0.97	8.35	1.26	2.05
77	Amobarbital	000057-43-2	Polyethylene-co-vinylacetate	6.27423e+10	10.7976	18.7	1.27184	xxxxxxxxx	xxxxxxxxx	xxxxxxxxx	xxxxxxxxx	xxxxxxxxx	11.6681	1.13613	37	310	(Piringer and Baner, 2008)	Water	dimensionless	CCC1(C(=O)NC(=O)NC1=O)CCC(C)C	226.28	12.532	2	-10.532	-10.462	2.02e-08	4.53e-07	-6.3439	-7.69465	128.3	20	-148.3	-9.52572	0.52	1.24	9.97	1.35	1.8
131	Androst-4-ene3,17-dione	000063-05-8	Polyethylene-co-vinylacetate	1.70569e+07	7.2319	152	2.18184	xxxxxxxxx	xxxxxxxxx	xxxxxxxxx	xxxxxxxxx	xxxxxxxxx	7.85913	2.04613	37	310	(Piringer and Baner, 2008)	Water	dimensionless	CC12CCC(=O)C=C1CCC3C2CCC4(C3CCC4=O)C	286.42	8.573	2.76	-5.813	-5.823	0.000236	0.00541	-2.2668	-3.62709	92.4385	20	-112.439	-5.05006	0	1.01	11.16	2.5	2.34
94	Testosterone	000058-22-0	Polyethylene-co-vinylacetate	1.67219e+08	8.22329	165	2.21748	xxxxxxxxx	xxxxxxxxx	xxxxxxxxx	xxxxxxxxx	xxxxxxxxx	8.97278	2.08178	37	310	(Piringer and Baner, 2008)	Water	dimensionless	CC12CCC3C(C1CCC2O)CCC4=CC(=O)CCC34C	288.43	10.161	3.27	-6.891	-6.841	2.27e-06	4.84e-05	-4.31515	-5.64397	110.456	20	-130.456	-6.0058	0.31	1.01	11.18	2.27	2.38
666	L-methadone	000125-58-6	Polyethylene-co-vinylacetate	3.58006e+10	10.5539	7800	3.89209	xxxxxxxxx	xxxxxxxxx	xxxxxxxxx	xxxxxxxxx	xxxxxxxxx	11.2084	3.75639	37	310	(Piringer and Baner, 2008)	Water	dimensionless	CCC(=O)C(CC(C)N(C)C)(C1=CC=CC=C1)C2=CC=CC=C2	309.46	11.622	4.17	-7.452	-7.692	0.000149	0.00189	-2.72354	-3.82681	96.4559	20	-116.456	-6.6618	0	1.09	11.22	1.72	2.71
242	Codeine	000076-57-3	Polyethylene-co-vinylacetate	6.41809e+10	10.8074	2	0.30103	xxxxxxxxx	xxxxxxxxx	xxxxxxxxx	xxxxxxxxx	xxxxxxxxx	11.5843	0.165321	37	310	(Piringer and Baner, 2008)	Water	dimensionless	CN1CCC23C4C1CC5=C2C(=C(C=C5)OC)OC3C(C=C4)O	299.37	12.699	1.28	-11.419	-11.509	2.55e-08	1.68e-05	-4.77469	-7.59346	114.498	20	-134.498	-10.5064	0.23	1.58	11.64	1.92	2.21
85	Progesterone	000057-83-0	Polyethylene-co-vinylacetate	1.61883e+08	8.2092	1620	3.20952	xxxxxxxxx	xxxxxxxxx	xxxxxxxxx	xxxxxxxxx	xxxxxxxxx	8.84981	3.07381	37	310	(Piringer and Baner, 2008)	Water	dimensionless	CC(=O)C1CCC2C1(CCC3C2CCC4=CC(=O)CCC34C)C	314.47	9.446	3.67	-5.776	-5.576	0.000359	0.00323	-2.4908	-3.44491	94.4087	20	-114.409	-4.99969	0	1.04	12.04	2.49	2.62
1235	3-ketodesogestrel	054048-10-1	Polyethylene-co-vinylacetate	2.95331e+08	8.47031	506	2.70415	xxxxxxxxx	xxxxxxxxx	xxxxxxxxx	xxxxxxxxx	xxxxxxxxx	9.27344	2.56844	37	310	(Piringer and Baner, 2008)	Water	dimensionless	CCC12CC(=C)C3C(C1CCC2(C#C)O)CCC4=CC(=O)CCC34	324.47	10.595	3.89	-6.705	-7.435	1.68e-07	6.11e-06	-5.21396	-6.77469	118.361	20	-138.361	-5.76616	0.4	1.14	12.33	2.45	2.68
835	Naltrexone	000465-65-6	Polyethylene-co-vinylacetate	1.11496e+18	18.0473	18.3	1.26245	xxxxxxxxx	xxxxxxxxx	xxxxxxxxx	xxxxxxxxx	xxxxxxxxx	18.9247	1.12674	37	310	(Piringer and Baner, 2008)	Water	dimensionless	C=CCN1CCC23C4C(=O)CCC2(C1CC5=C3C(=C(C=C5)O)O4)O	327.38	18.748	0.95	-17.798	-16.658	5.67e-09	3.47e-07	-6.45967	-8.24642	129.318	20	-149.318	-16.7848	0.5	1.75	12.67	2.02	2.36
5	Corticosterone	000050-22-6	Polyethylene-co-vinylacetate	4.95696e+07	7.69522	9.79	0.990783	xxxxxxxxx	xxxxxxxxx	xxxxxxxxx	xxxxxxxxx	xxxxxxxxx	8.62507	0.855074	37	310	(Piringer and Baner, 2008)	Water	dimensionless	CC12CCC(=O)C=C1CCC3C2C(CC4(C3CCC4C(=O)CO)C)O	346.47	9.76	1.99	-7.77	-7.82	1.09e-09	4.6e-08	-7.33724	-8.96257	137.037	20	-157.037	-6.70443	0.48	1.62	12.97	2.8	2.74
37	Cortisone	000053-06-5	Polyethylene-co-vinylacetate	2.44981e+06	6.38913	1.71	0.232996	xxxxxxxxx	xxxxxxxxx	xxxxxxxxx	xxxxxxxxx	xxxxxxxxx	7.36529	0.0972874	37	310	(Piringer and Baner, 2008)	Water	dimensionless	CC12CCC(=O)C=C1CCC3C2C(=O)CC4(C3CCC4(C(=O)CO)O)C	360.45	9.078	1.81	-7.268	-7.608	6.02e-11	7.71e-09	-8.11295	-10.2204	143.86	20	-163.86	-6.15614	0.41	1.9	13.26	3.15	2.75
700	Ethyl acetate	000141-78-6	PS	299.685	2.47667	1.9	0.278754	xxxxxxxxx	xxxxxxxxx	xxxxxxxxx	xxxxxxxxx	xxxxxxxxx	2.43344	0.302441	23	296	(Piringer and Baner, 2008)	Water	dimensionless	CCOC(=O)C	88.11	2.991	0.86	-2.131	-2.261	13100	12400	4.09342	4.11727	36.4948	20	-56.4948	-2.19791	0	0.36	2.35	0.58	0.75
511	Toluene	000108-88-3	PS	5387.22	3.73136	800	2.90309	xxxxxxxxx	xxxxxxxxx	xxxxxxxxx	xxxxxxxxx	xxxxxxxxx	3.68278	2.92678	23	296	(Piringer and Baner, 2008)	Water	dimensionless	CC1=CC=CC=C1	92.14	3.296	2.54	-0.756	-0.566	3160	3790	3.57864	3.49969	41.0227	20	-61.0227	-0.828275	0	0.12	3.43	0.63	0.86
1014	D-limonene	005989-27-5	PS	1691.76	3.22834	5100	3.70757	xxxxxxxxx	xxxxxxxxx	xxxxxxxxx	xxxxxxxxx	xxxxxxxxx	3.16626	3.73126	23	296	(Piringer and Baner, 2008)	Water	dimensionless	CC1=CCC(CC1)C(=C)C	136.24	4.265	4.83	0.565	0.115	193	192	2.2833	2.28556	52.4164	20	-72.4164	0.47923	0	0.2	4.54	0.32	1.32
338	naphthalene	000091-20-3	LDPE	83094.5	4.91957	645.654	2.81	0.92	4.88336	2.77379	76446.9	594.002	4.70861	2.83361	20	293	(Smedes, Geertsma, van der Zande, Booij, 2009)	Water (Log)	cm^3/g	C1=CC=C2C=CC=CC2=C1	128.18	5.045	3.17	-1.875	-1.745	5.38	39.9	1.60097	0.730782	58.418	20	-78.418	-2.10957	0	0.17	5.33	1.02	1.09
776	acenaphthylene	000208-96-8	LDPE	565502	5.75243	1445.44	3.16	0.92	5.71622	3.12379	520262	1329.8	5.51561	3.18361	20	293	(Smedes, Geertsma, van der Zande, Booij, 2009)	Water (Log)	cm^3/g	C1=CC2=C3C(=C1)C=CC3=CC=C2	152.2	6.272	3.94	-2.332	-2.332	0.167	4.15	0.618048	-0.777284	67.0637	20	-87.0637	-2.59243	0	0.21	6.56	1.09	1.22
268	acenaphthene	000083-32-9	LDPE	612607	5.78718	4168.69	3.62	0.92	5.75097	3.58379	563598	3835.2	5.53761	3.64361	20	293	(Smedes, Geertsma, van der Zande, Booij, 2009)	Water (Log)	cm^3/g	C1CC2=CC=CC3=C2C1=CC=C3	154.21	6.044	4.15	-1.894	-2.124	0.172	1.36	0.133539	-0.764472	71.3254	20	-91.3254	-2.16718	0	0.15	6.56	0.99	1.26
104	Hexachlorobenzene	000058-89-9	LDPE	2.0054e+09	9.3022	269153	5.43	0.92	9.26599	5.39379	1.84497e+09	247621	9.01061	5.45361	20	293	(Smedes, Geertsma, van der Zande, Booij, 2009)	Water (Log)	cm^3/g	C1(C(C(C(C(C1Cl)Cl)Cl)Cl)Cl)Cl	290.83	7.817	4.26	-3.557	-3.677	0.0674	0.0344	-1.46344	-1.17134	85.3722	20	-105.372	-3.8722	0	0.4	7	1.1	1.58
312	fluorene	000086-73-7	LDPE	4.14168e+06	6.61718	5888.44	3.77	0.92	6.58096	3.73379	3.81034e+06	5417.36	6.35861	3.79361	20	293	(Smedes, Geertsma, van der Zande, Booij, 2009)	Water (Log)	cm^3/g	C1C2=CC=CC=C2C3=CC=CC=C31	166.22	6.585	4.02	-2.565	-2.405	0.044	0.619	-0.208309	-1.35655	74.3323	20	-94.3323	-2.84718	0	0.19	7.04	1.13	1.36
1082	PCB-10	033146-45-1	LDPE	3.10085e+06	6.49148	16982.4	4.23	0.92	6.45527	4.19379	2.85278e+06	15623.8	6.21061	4.25361	20	293	(Smedes, Geertsma, van der Zande, Booij, 2009)	Water (Log)	cm^3/g	C1=CC=C(C=C1)C2=C(C=CC=C2Cl)Cl	223.1	7.007	5.05	-1.957	-2.027	0.0254	0.0879	-1.05601	-1.59517	81.7885	20	-101.789	-2.26148	0	0.15	7.47	1.31	1.57
1099	PCB-14	034883-41-5	LDPE	5.01742e+07	7.70048	97723.7	4.99	0.92	7.66427	4.95379	4.61603e+07	89905.8	7.41961	5.01361	20	293	(Smedes, Geertsma, van der Zande, Booij, 2009)	Water (Log)	cm^3/g	C1=CC=C(C=C1)C2=CC(=CC(=C2)Cl)Cl	223.1	7.456	5.05	-2.406	-2.046	0.0254	0.0879	-1.05601	-1.59517	81.7885	20	-101.789	-2.71048	0	0.15	7.47	1.31	1.57
1037	PCB-4	013029-08-8	LDPE	2.79045e+06	6.44567	15488.2	4.19	0.92	6.40946	4.15379	2.56721e+06	14249.1	6.19061	4.21361	20	293	(Smedes, Geertsma, van der Zande, Booij, 2009)	Water (Log)	cm^3/g	C1=CC=C(C(=C1)C2=CC=CC=C2Cl)Cl	223.1	7.027	5.05	-1.977	-2.027	0.0401	0.841	-0.075204	-1.39686	73.1615	20	-93.1615	-2.25567	0	0.21	7.56	1.32	1.57
293	Phenanthrene	000085-01-8	LDPE	2.49191e+07	7.39653	16595.9	4.22	0.92	7.36032	4.18379	2.29256e+07	15268.2	7.11561	4.24361	20	293	(Smedes, Geertsma, van der Zande, Booij, 2009)	Water (Log)	cm^3/g	C1=CC=C2C(=C1)C=CC3=CC=CC=C32	178.24	7.222	4.35	-2.872	-2.762	0.00576	0.0875	-1.05799	-2.23958	81.806	20	-101.806	-3.17653	0	0.23	7.71	1.34	1.45
602	Anthracene	000120-12-7	LDPE	2.4031e+07	7.38077	21379.6	4.33	0.92	7.34456	4.29379	2.21085e+07	19669.3	7.09661	4.35361	20	293	(Smedes, Geertsma, van der Zande, Booij, 2009)	Water (Log)	cm^3/g	C1=CC=C2C=C3C=CC=CC3=CC2=C1	178.24	7.093	4.35	-2.743	-2.643	0.000289	0.0659	-1.18111	-3.5391	82.8889	20	-102.889	-3.05077	0	0.23	7.71	1.34	1.45
1124	PCB-30	035693-92-6	LDPE	3.97009e+06	6.5988	134896	5.13	0.92	6.56259	5.09379	3.65248e+06	124105	6.33861	5.15361	20	293	(Smedes, Geertsma, van der Zande, Booij, 2009)	Water (Log)	cm^3/g	C1=CC=C(C=C1)C2=C(C=C(C=C2Cl)Cl)Cl	257.55	6.875	5.69	-1.185	-1.405	0.00533	0.537	-0.270026	-2.27327	74.8751	20	-94.8751	-1.4688	0	0.12	8.05	1.38	1.69
1142	PCB-18	037680-65-2	LDPE	1.07255e+07	7.03042	79432.8	4.9	0.92	6.99421	4.86379	9.86747e+06	73078.2	6.77461	4.92361	20	293	(Smedes, Geertsma, van der Zande, Booij, 2009)	Water (Log)	cm^3/g	C1=CC=C(C(=C1)C2=C(C=CC(=C2)Cl)Cl)Cl	257.55	7.541	5.69	-1.851	-1.991	0.00533	0.788	-0.103474	-2.27327	73.4101	20	-93.4101	-2.13042	0	0.19	8.1	1.43	1.69
1047	PCB-31	016606-02-3	LDPE	5.0171e+07	7.70045	199526	5.3	0.92	7.66424	5.26379	4.61574e+07	183564	7.43361	5.32361	20	293	(Smedes, Geertsma, van der Zande, Booij, 2009)	Water (Log)	cm^3/g	C1=CC(=CC=C1C2=C(C=CC(=C2)Cl)Cl)Cl	257.55	7.8	5.69	-2.11	-2.11	0.00533	0.3	-0.522879	-2.27327	77.0992	20	-97.0992	-2.40045	0	0.19	8.1	1.43	1.69
1024	PCB-28	007012-37-5	LDPE	5.09862e+07	7.70745	251189	5.4	0.92	7.67124	5.36379	4.69073e+07	231094	7.44061	5.42361	20	293	(Smedes, Geertsma, van der Zande, Booij, 2009)	Water (Log)	cm^3/g	C1=CC(=CC=C1C2=C(C=C(C=C2)Cl)Cl)Cl	257.55	7.707	5.69	-2.017	-2.087	0.00533	0.3	-0.522879	-2.27327	77.0992	20	-97.0992	-2.30745	0	0.15	8.1	1.39	1.69
1043	PCB-29	015862-07-4	LDPE	6.36261e+07	7.80364	204174	5.31	0.92	7.76742	5.27379	5.8536e+07	187840	7.54061	5.33361	20	293	(Smedes, Geertsma, van der Zande, Booij, 2009)	Water (Log)	cm^3/g	C1=CC=C(C=C1)C2=CC(=C(C=C2Cl)Cl)Cl	257.55	7.897	5.69	-2.207	-2.087	0.00952	0.419	-0.377786	-2.02136	75.823	20	-95.823	-2.49364	0	0.13	8.13	1.42	1.69
1238	PCB-21	055702-46-0	LDPE	7.41435e+07	7.87007	165959	5.22	0.92	7.83386	5.18379	6.8212e+07	152682	7.57661	5.24361	20	293	(Smedes, Geertsma, van der Zande, Booij, 2009)	Water (Log)	cm^3/g	C1=CC=C(C=C1)C2=C(C(=C(C=C2)Cl)Cl)Cl	257.55	8.023	5.69	-2.333	-2.163	0.00533	0.0292	-1.53462	-2.27327	85.9983	20	-105.998	-2.65007	0	0.13	8.27	1.39	1.69
989	PCB-47	002437-79-8	LDPE	9.60154e+07	7.98234	416869	5.62	0.92	7.94613	5.58379	8.83342e+07	383520	7.70361	5.64361	20	293	(Smedes, Geertsma, van der Zande, Booij, 2009)	Water (Log)	cm^3/g	C1=CC(=C(C=C1Cl)Cl)C2=C(C=C(C=C2)Cl)Cl	291.99	8.4	6.34	-2.06	-2.11	0.00113	0.106	-0.974694	-2.94692	81.0733	20	-101.073	-2.36234	0	0.09	8.63	1.46	1.81
1127	PCB-52	035693-99-3	LDPE	5.19709e+07	7.71576	354813	5.55	0.92	7.67955	5.51379	4.78132e+07	326428	7.41061	5.57361	20	293	(Smedes, Geertsma, van der Zande, Booij, 2009)	Water (Log)	cm^3/g	C1=CC(=C(C=C1Cl)C2=C(C=CC(=C2)Cl)Cl)Cl	291.99	8.177	6.34	-1.837	-2.087	0.00113	0.0105	-1.97881	-2.94692	89.9054	20	-109.905	-2.16576	0	0.18	8.64	1.55	1.81
1188	PCB-49	041464-40-8	LDPE	8.80784e+07	7.94487	467735	5.67	0.92	7.90866	5.63379	8.10322e+07	430316	7.63961	5.69361	20	293	(Smedes, Geertsma, van der Zande, Booij, 2009)	Water (Log)	cm^3/g	C1=CC(=C(C=C1Cl)Cl)C2=C(C=CC(=C2)Cl)Cl	291.99	8.286	6.34	-1.946	-2.066	0.00113	0.0104	-1.98297	-2.94692	89.9419	20	-109.942	-2.27487	0	0.13	8.64	1.5	1.81
1254	PCB-50	062796-65-0	LDPE	1.3828e+08	8.14076	331131	5.52	0.92	8.10455	5.48379	1.27218e+08	304641	7.83561	5.54361	20	293	(Smedes, Geertsma, van der Zande, Booij, 2009)	Water (Log)	cm^3/g	C1=CC=C(C(=C1)C2=C(C=C(C=C2Cl)Cl)Cl)Cl	291.99	8.632	6.34	-2.292	-2.292	0.00113	0.0105	-1.97881	-2.94692	89.9054	20	-109.905	-2.62076	0	0.12	8.68	1.46	1.81
1069	PCB-66	032598-10-0	LDPE	3.45566e+08	8.53853	891251	5.95	0.92	8.50232	5.91379	3.1792e+08	819951	8.25261	5.97361	20	293	(Smedes, Geertsma, van der Zande, Booij, 2009)	Water (Log)	cm^3/g	C1=CC(=C(C=C1C2=C(C=C(C=C2)Cl)Cl)Cl)Cl	291.99	8.619	6.34	-2.279	-2.309	0.00113	0.0565	-1.24795	-2.94692	83.4768	20	-103.477	-2.58853	0	0.13	8.84	1.47	1.81
1186	PCB-44	041464-39-5	LDPE	3.31711e+07	7.52076	301995	5.48	0.92	7.48455	5.44379	3.05174e+07	277836	7.21561	5.50361	20	293	(Smedes, Geertsma, van der Zande, Booij, 2009)	Water (Log)	cm^3/g	C1=CC(=C(C(=C1)Cl)Cl)C2=C(C=CC(=C2)Cl)Cl	291.99	8.052	6.34	-1.712	-2.242	0.00113	0.0105	-1.97881	-2.94692	89.9054	20	-109.905	-2.04076	0	0.18	8.85	1.52	1.81
1276	PCB-55	074338-24-2	LDPE	2.75905e+08	8.44076	660693	5.82	0.92	8.40455	5.78379	2.53833e+08	607838	8.13561	5.84361	20	293	(Smedes, Geertsma, van der Zande, Booij, 2009)	Water (Log)	cm^3/g	C1=CC(=CC(=C1)Cl)C2=C(C(=C(C=C2)Cl)Cl)Cl	291.99	8.632	6.34	-2.292	-2.292	0.00113	0.0105	-1.97881	-2.94692	89.9054	20	-109.905	-2.62076	0	0.13	8.9	1.47	1.81
1269	PCB-78	070362-49-1	LDPE	4.47466e+08	8.65076	1.07152e+06	6.03	0.92	8.61455	5.99379	4.11669e+08	985798	8.34561	6.05361	20	293	(Smedes, Geertsma, van der Zande, Booij, 2009)	Water (Log)	cm^3/g	C1=CC(=CC(=C1)Cl)C2=CC(=C(C(=C2)Cl)Cl)Cl	291.99	8.632	6.34	-2.292	-2.292	0.00113	0.0105	-1.97881	-2.94692	89.9054	20	-109.905	-2.62076	0	0.13	8.9	1.47	1.81
1191	PCB-56	041464-43-1	LDPE	3.31711e+08	8.52076	794328	5.9	0.92	8.48455	5.86379	3.05174e+08	730782	8.21561	5.92361	20	293	(Smedes, Geertsma, van der Zande, Booij, 2009)	Water (Log)	cm^3/g	C1=CC(=C(C(=C1)Cl)Cl)C2=CC(=C(C=C2)Cl)Cl	291.99	8.632	6.34	-2.292	-2.292	0.00113	0.0105	-1.97881	-2.94692	89.9054	20	-109.905	-2.62076	0	0.18	9.05	1.49	1.81
755	fluoranthene	000206-44-0	LDPE	8.56469e+08	8.93271	85113.8	4.93	0.92	8.8965	4.89379	7.87951e+08	78304.7	8.62461	4.95361	20	293	(Smedes, Geertsma, van der Zande, Booij, 2009)	Water (Log)	cm^3/g	C1=CC=C2C(=C1)C3=CC=CC4=C3C2=CC=C4	202.26	8.601	4.93	-3.671	-3.441	0.000417	0.00811	-2.09098	-3.37986	90.892	20	-110.892	-4.00271	0	0.25	9.11	1.52	1.58
678	Pyrene	000129-00-0	LDPE	4.91645e+08	8.69165	125893	5.1	0.92	8.65544	5.06379	4.52314e+08	115821	8.38661	5.12361	20	293	(Smedes, Geertsma, van der Zande, Booij, 2009)	Water (Log)	cm^3/g	C1=CC2=C3C(=C1)C=CC4=CC=CC(=C43)C=C2	202.26	8.193	4.93	-3.263	-3.313	4.59e-05	0.0106	-1.97469	-4.33819	89.8692	20	-109.869	-3.59165	0	0.25	9.11	1.52	1.58
1241	PCB-104	056558-16-8	LDPE	5.80212e+08	8.76359	1000000	6	0.92	8.72737	5.96379	5.33795e+08	920000	8.44661	6.02361	20	293	(Smedes, Geertsma, van der Zande, Booij, 2009)	Water (Log)	cm^3/g	C1=CC(=C(C(=C1)Cl)C2=C(C=C(C=C2Cl)Cl)Cl)Cl	326.44	9.403	6.98	-2.423	-2.423	0.000993	0.00373	-2.42829	-3.00305	93.8589	20	-113.859	-2.76359	0	0.06	9.22	1.53	1.94
1153	PCB-99	038380-01-7	LDPE	2.63517e+09	9.42081	2.39883e+06	6.38	0.92	9.3846	6.34379	2.42436e+09	2.20693e+06	9.12961	6.40361	20	293	(Smedes, Geertsma, van der Zande, Booij, 2009)	Water (Log)	cm^3/g	C1=CC(=C(C=C1Cl)Cl)C2=CC(=C(C=C2Cl)Cl)Cl	326.44	9.706	6.98	-2.726	-2.496	0.000295	0.0356	-1.44855	-3.53018	85.2413	20	-105.241	-3.04081	0	0.07	9.29	1.57	1.94
1148	PCB-101	037680-73-2	LDPE	5.58793e+08	8.74725	1.51356e+06	6.18	0.92	8.71104	6.14379	5.14089e+08	1.39248e+06	8.45761	6.20361	20	293	(Smedes, Geertsma, van der Zande, Booij, 2009)	Water (Log)	cm^3/g	C1=CC(=C(C=C1Cl)C2=CC(=C(C=C2Cl)Cl)Cl)Cl	326.44	9.234	6.98	-2.254	-2.434	0.000295	0.0408	-1.38934	-3.53018	84.7205	20	-104.72	-2.56725	0	0.11	9.3	1.61	1.94
1256	PCB-85	065510-45-4	LDPE	4.78175e+08	8.67959	1.38038e+06	6.14	0.92	8.64337	6.10379	4.39921e+08	1.26995e+06	8.36261	6.16361	20	293	(Smedes, Geertsma, van der Zande, Booij, 2009)	Water (Log)	cm^3/g	C1=CC(=C(C=C1Cl)Cl)C2=C(C(=C(C=C2)Cl)Cl)Cl	326.44	9.179	6.98	-2.199	-2.569	0.000295	0.00373	-2.42829	-3.53018	93.8589	20	-113.859	-2.53959	0	0.07	9.44	1.54	1.94
1155	PCB-87	038380-02-8	LDPE	7.70475e+08	8.88676	1.51356e+06	6.18	0.92	8.85055	6.14379	7.08837e+08	1.39248e+06	8.59261	6.20361	20	293	(Smedes, Geertsma, van der Zande, Booij, 2009)	Water (Log)	cm^3/g	C1=CC(=C(C=C1Cl)C2=C(C(=C(C=C2)Cl)Cl)Cl)Cl	326.44	9.369	6.98	-2.389	-2.519	0.000295	0.0275	-1.56067	-3.53018	86.2274	20	-106.227	-2.70676	0	0.12	9.44	1.58	1.94
1196	PCB-97	041464-51-1	LDPE	4.46259e+08	8.64959	1.25893e+06	6.1	0.92	8.61337	6.06379	4.10558e+08	1.15821e+06	8.33261	6.12361	20	293	(Smedes, Geertsma, van der Zande, Booij, 2009)	Water (Log)	cm^3/g	C1=CC(=C(C(=C1)Cl)Cl)C2=CC(=C(C=C2Cl)Cl)Cl	326.44	9.189	6.98	-2.209	-2.519	0.000295	0.00373	-2.42829	-3.53018	93.8589	20	-113.859	-2.54959	0	0.11	9.5	1.59	1.94
1157	PCB-110	038380-03-9	LDPE	1.45743e+08	8.16359	1.44544e+06	6.16	0.92	8.12737	6.12379	1.34083e+08	1.3298e+06	7.84661	6.18361	20	293	(Smedes, Geertsma, van der Zande, Booij, 2009)	Water (Log)	cm^3/g	C1=CC(=C(C=C1C2=C(C=CC(=C2Cl)Cl)Cl)Cl)Cl	326.44	8.643	6.98	-1.663	-2.423	0.000295	0.00373	-2.42829	-3.53018	93.8589	20	-113.859	-2.00359	0	0.11	9.5	1.59	1.94
1064	PCB-118	031508-00-6	LDPE	8.39599e+08	8.92407	3.38844e+06	6.53	0.92	8.88786	6.49379	7.72431e+08	3.11737e+06	8.62261	6.55361	20	293	(Smedes, Geertsma, van der Zande, Booij, 2009)	Water (Log)	cm^3/g	C1=CC(=C(C=C1C2=CC(=C(C=C2Cl)Cl)Cl)Cl)Cl	326.44	9.049	6.98	-2.069	-1.929	0.000295	0.0145	-1.83863	-3.53018	88.6724	20	-108.672	-2.39407	0	0.11	9.5	1.59	1.94
1074	PCB-105	032598-14-4	LDPE	3.27832e+08	8.51565	2.75423e+06	6.44	0.92	8.47944	6.40379	3.01606e+08	2.53389e+06	8.21061	6.46361	20	293	(Smedes, Geertsma, van der Zande, Booij, 2009)	Water (Log)	cm^3/g	C1=CC(=C(C=C1C2=C(C(=C(C=C2)Cl)Cl)Cl)Cl)Cl	326.44	8.727	6.98	-1.747	-1.937	0.000295	0.0106	-1.97469	-3.53018	89.8692	20	-109.869	-2.07565	0	0.12	9.65	1.56	1.94
1093	PCB-155	033979-03-2	LDPE	1.31133e+08	8.11771	7.58578e+06	6.88	0.92	8.0815	6.84379	1.20642e+08	6.97891e+06	7.82261	6.90361	20	293	(Smedes, Geertsma, van der Zande, Booij, 2009)	Water (Log)	cm^3/g	C1=C(C=C(C(=C1Cl)C2=C(C=C(C=C2Cl)Cl)Cl)Cl)Cl	360.88	8.539	7.62	-0.919	-0.989	7.74e-05	0.0253	-1.59688	-4.11126	86.546	20	-106.546	-1.23771	0	0.03	9.8	1.6	2.06
1208	PCB-151	052663-63-5	LDPE	3.20339e+09	9.50561	3.54813e+06	6.55	0.92	9.4694	6.51379	2.94712e+09	3.26428e+06	9.19161	6.57361	20	293	(Smedes, Geertsma, van der Zande, Booij, 2009)	Water (Log)	cm^3/g	C1=CC(=C(C=C1Cl)C2=C(C(=CC(=C2Cl)Cl)Cl)Cl)Cl	360.88	10.238	7.62	-2.618	-2.618	7.74e-05	0.00484	-2.31515	-4.11126	92.8638	20	-112.864	-2.95561	0	0.03	9.87	1.71	2.06
1282	PCB-145	074472-40-5	LDPE	2.66352e+09	9.42546	3.31131e+06	6.52	0.92	9.38924	6.48379	2.45044e+09	3.04641e+06	9.09661	6.54361	20	293	(Smedes, Geertsma, van der Zande, Booij, 2009)	Water (Log)	cm^3/g	C1=CC(=C(C(=C1)Cl)C2=C(C(=C(C=C2Cl)Cl)Cl)Cl)Cl	360.88	10.173	7.62	-2.553	-2.553	7.74e-05	0.00132	-2.87943	-4.11126	97.8271	20	-117.827	-2.90546	0	0.03	9.94	1.64	2.06
1159	PCB-149	038380-04-0	LDPE	6.63231e+07	7.82166	3.89045e+06	6.59	0.92	7.78545	6.55379	6.10173e+07	3.57922e+06	7.52261	6.61361	20	293	(Smedes, Geertsma, van der Zande, Booij, 2009)	Water (Log)	cm^3/g	C1=CC(=C(C(=C1Cl)C2=CC(=C(C=C2Cl)Cl)Cl)Cl)Cl	360.88	8.529	7.62	-0.909	-1.249	7.74e-05	0.0179	-1.74715	-4.11126	87.8677	20	-107.868	-1.23166	0	0.04	9.95	1.68	2.06
1226	PCB-141	052712-04-6	LDPE	4.89166e+09	9.68946	5.49541e+06	6.74	0.92	9.65324	6.70379	4.50033e+09	5.05578e+06	9.36061	6.76361	20	293	(Smedes, Geertsma, van der Zande, Booij, 2009)	Water (Log)	cm^3/g	C1=CC(=C(C=C1Cl)C2=CC(=C(C(=C2Cl)Cl)Cl)Cl)Cl	360.88	10.217	7.62	-2.597	-3.027	7.74e-05	0.00132	-2.87943	-4.11126	97.8271	20	-117.827	-2.94946	0	0.04	9.95	1.68	2.06
1102	PCB-153	035065-27-1	LDPE	1.99523e+10	10.3	6.45654e+06	6.81	0.92	10.2638	6.77379	1.83561e+10	5.94002e+06	9.99061	6.83361	20	293	(Smedes, Geertsma, van der Zande, Booij, 2009)	Water (Log)	cm^3/g	C1=C(C(=CC(=C1Cl)Cl)Cl)C2=CC(=C(C=C2Cl)Cl)Cl	360.88	10.777	7.62	-3.157	-3.027	7.74e-05	0.00725	-2.13966	-4.11126	91.3202	20	-111.32	-3.48999	0	0.04	9.95	1.68	2.06
1136	PCB-137	035694-06-5	LDPE	4.52331e+09	9.65546	8.51138e+06	6.93	0.92	9.61924	6.89379	4.16145e+09	7.83047e+06	9.32661	6.95361	20	293	(Smedes, Geertsma, van der Zande, Booij, 2009)	Water (Log)	cm^3/g	C1=CC(=C(C=C1Cl)Cl)C2=CC(=C(C(=C2Cl)Cl)Cl)Cl	360.88	9.993	7.62	-2.373	-2.553	7.74e-05	0.00132	-2.87943	-4.11126	97.8271	20	-117.827	-2.72546	0	0	9.95	1.64	2.06
61	benz[a]anthracene	000056-55-3	LDPE	4.57264e+09	9.66017	537032	5.73	0.92	9.62395	5.69379	4.20683e+09	494069	9.30261	5.75361	20	293	(Smedes, Geertsma, van der Zande, Booij, 2009)	Water (Log)	cm^3/g	C1=CC=C2C(=C1)C=CC3=CC4=CC=CC=C4C=C32	228.3	9.069	5.52	-3.549	-3.309	3.62e-05	0.000107	-3.97062	-4.44129	107.425	20	-127.425	-3.93017	0	0.29	10.08	1.66	1.82
783	Chrysene	000218-01-9	LDPE	1.30621e+10	10.116	602560	5.78	0.92	10.0798	5.74379	1.20171e+10	554355	9.76361	5.80361	20	293	(Smedes, Geertsma, van der Zande, Booij, 2009)	Water (Log)	cm^3/g	C1=CC=C2C(=C1)C=CC3=C2C=CC4=CC=CC=C43	228.3	9.48	5.52	-3.96	-3.67	2.08e-07	0.000168	-3.77469	-6.68194	105.702	20	-125.702	-4.33601	0	0.29	10.08	1.66	1.82
1109	PCB-138	035065-28-2	LDPE	1.091e+10	10.0378	6.60693e+06	6.82	0.92	10.0016	6.78379	1.00372e+10	6.07838e+06	9.72961	6.84361	20	293	(Smedes, Geertsma, van der Zande, Booij, 2009)	Water (Log)	cm^3/g	C1=CC(=C(C(=C1C2=CC(=C(C=C2Cl)Cl)Cl)Cl)Cl)Cl	360.88	10.506	7.62	-2.886	-3.066	7.74e-05	0.00803	-2.09528	-4.11126	90.9299	20	-110.93	-3.21782	0	0.05	10.1	1.65	2.06
1165	PCB-156	038380-08-4	LDPE	3.27073e+09	9.51465	9.12011e+06	6.96	0.92	9.47843	6.92379	3.00907e+09	8.3905e+06	9.19661	6.98361	20	293	(Smedes, Geertsma, van der Zande, Booij, 2009)	Water (Log)	cm^3/g	C1=CC(=C(C=C1C2=CC(=C(C(=C2Cl)Cl)Cl)Cl)Cl)Cl	360.88	9.833	7.62	-2.213	-2.233	7.74e-05	0.0034	-2.46852	-4.11126	94.2128	20	-114.213	-2.55465	0	0.04	10.16	1.65	2.06
1163	PCB-128	038380-07-3	LDPE	1.09986e+10	10.0413	5.49541e+06	6.74	0.92	10.0051	6.70379	1.01187e+10	5.05578e+06	9.72861	6.76361	20	293	(Smedes, Geertsma, van der Zande, Booij, 2009)	Water (Log)	cm^3/g	C1=CC(=C(C(=C1C2=C(C(=C(C=C2)Cl)Cl)Cl)Cl)Cl)Cl	360.88	10.585	7.62	-2.965	-3.275	7.74e-05	0.00541	-2.2668	-4.11126	92.4385	20	-112.439	-3.30134	0	0.05	10.25	1.62	2.06
1213	PCB-187	052663-68-0	LDPE	1.1415e+10	10.0575	1.02329e+07	7.01	0.92	10.0213	6.97379	1.05018e+10	9.4143e+06	9.71661	7.03361	20	293	(Smedes, Geertsma, van der Zande, Booij, 2009)	Water (Log)	cm^3/g	C1=C(C(=CC(=C1Cl)Cl)Cl)C2=C(C(=CC(=C2Cl)Cl)Cl)Cl	395.33	10.953	8.27	-2.683	-2.683	1.74e-05	0.000461	-3.3363	-4.75945	101.846	20	-121.846	-3.04748	0	0	10.52	1.78	2.18
1114	PCB-180	035065-29-3	LDPE	9.35161e+10	10.9709	1.7378e+07	7.24	0.92	10.9347	7.20379	8.60348e+10	1.59878e+07	10.6516	7.26361	20	293	(Smedes, Geertsma, van der Zande, Booij, 2009)	Water (Log)	cm^3/g	C1=C(C(=CC(=C1Cl)Cl)Cl)C2=CC(=C(C(=C2Cl)Cl)Cl)Cl	395.33	11.658	8.27	-3.388	-3.388	1.74e-05	0.00305	-2.5157	-4.75945	94.6278	20	-114.628	-3.73089	0	0	10.61	1.75	2.18
1122	PCB-170	035065-30-6	LDPE	1.07631e+11	11.0319	1.77828e+07	7.25	0.92	10.9957	7.21379	9.9021e+10	1.63602e+07	10.7076	7.27361	20	293	(Smedes, Geertsma, van der Zande, Booij, 2009)	Water (Log)	cm^3/g	C1=CC(=C(C(=C1C2=CC(=C(C(=C2Cl)Cl)Cl)Cl)Cl)Cl)Cl	395.33	11.704	8.27	-3.434	-3.434	1.74e-05	0.00196	-2.70774	-4.75945	96.317	20	-116.317	-3.78194	0	0	10.76	1.72	2.18
1286	PCB-204	074472-52-9	LDPE	9.11107e+10	10.9596	5.88844e+07	7.77	0.92	10.9234	7.73379	8.38218e+10	5.41736e+07	10.6066	7.79361	20	293	(Smedes, Geertsma, van der Zande, Booij, 2009)	Water (Log)	cm^3/g	C1=C(C=C(C(=C1Cl)C2=C(C(=C(C(=C2Cl)Cl)Cl)Cl)Cl)Cl)Cl	429.77	11.723	8.91	-2.813	-2.813	3.83e-06	0.00016	-3.79588	-5.4168	105.888	20	-125.888	-3.18957	0	0	11.09	1.82	2.3
768	benz[b]fluoranthene+benz[k]fluoranthene	000207-08-9	LDPE	4.89807e+11	11.69	4.57088e+06	6.66	0.92	11.6538	6.62379	4.50622e+11	4.20521e+06	11.3056	6.68361	20	293	(Smedes, Geertsma, van der Zande, Booij, 2009)	Water (Log)	cm^3/g	C1=CC=C2C=C3C4=CC=CC5=C4C(=CC=C5)C3=CC2=C1	252.32	10.732	6.11	-4.622	-4.622	1.05e-07	1.02e-05	-4.9914	-6.97881	116.404	20	-136.404	-5.03002	0	0.31	11.48	1.84	1.95
25	Benz[a]pyrene	000050-32-8	LDPE	7.90104e+11	11.8977	5.62341e+06	6.75	0.92	11.8615	6.71379	7.26895e+11	5.17354e+06	11.5226	6.77361	20	293	(Smedes, Geertsma, van der Zande, Booij, 2009)	Water (Log)	cm^3/g	C1=CC=C2C3=C4C(=CC2=C1)C=CC5=C4C(=CC=C5)C=C3	252.32	10.859	6.11	-4.749	-4.729	1.31e-07	2.31e-05	-4.63639	-6.88273	113.281	20	-133.281	-5.14768	0	0.31	11.48	1.84	1.95
42	Dibenz[ah]anthracene	000053-70-3	LDPE	6.21592e+12	12.7935	2.0893e+07	7.32	0.92	12.7573	7.28379	5.71864e+12	1.92215e+07	12.4226	7.34361	20	293	(Smedes, Geertsma, van der Zande, Booij, 2009)	Water (Log)	cm^3/g	C1=CC=C2C(=C1)C=CC3=CC4=C(C=CC5=CC=CC=C54)C=C32	278.36	11.779	6.7	-5.079	-5.239	1.85e-09	3.33e-05	-4.47756	-8.73283	111.884	20	-131.884	-5.47351	0	0.35	12.45	1.99	2.19
720	Benz[ghi]perylene	000191-24-2	LDPE	8.94633e+12	12.9516	1.86209e+07	7.27	0.92	12.9154	7.23379	8.23062e+12	1.71312e+07	12.5646	7.29361	20	293	(Smedes, Geertsma, van der Zande, Booij, 2009)	Water (Log)	cm^3/g	c1cc2ccc3ccc4ccc5cccc6c5c4c3c2c6c1	276.34	11.971	6.7	-5.271	-5.271	1.17e-07	8.11e-06	-5.09098	-6.93181	117.28	20	-137.28	-5.68164	0	0.33	12.89	2.02	2.08
732	indeno[1,2,3-cd]pyrene	000193-39-5	LDPE	4.90727e+12	12.6908	2.51189e+07	7.4	0.92	12.6546	7.36379	4.51469e+12	2.31094e+07	12.2706	7.42361	20	293	(Smedes, Geertsma, van der Zande, Booij, 2009)	Water (Log)	cm^3/g	c1ccc-2c(c1)-c3ccc4ccc5cccc6c5c4c3c2c6	276.34	11.547	6.7	-4.847	-4.847	1.67e-08	4.44e-07	-6.35262	-7.77728	128.377	20	-148.377	-5.29084	0	0.33	12.89	2.02	2.08
719	coronene	000191-07-1	LDPE	4.81222e+14	14.6823	6.91831e+07	7.84	0.92	14.6461	7.80379	4.42724e+14	6.36484e+07	14.2856	7.86361	20	293	(Smedes, Geertsma, van der Zande, Booij, 2009)	Water (Log)	cm^3/g	C1=CC2=C3C4=C1C=CC5=C4C6=C(C=C5)C=CC7=C6C3=C(C=C2)C=C7	300.36	13.702	7.28	-6.422	-6.062	1.14e-11	3.47e-06	-5.45967	-10.9431	120.523	20	-140.523	-6.84235	0	0.35	14.29	2.2	2.21
303	Phenanthrene	000085-01-8	PDMS	6.99515e+06	6.8448	5370.32	3.73	xxxxxxxxx	xxxxxxxxx	xxxxxxxxx	xxxxxxxxx	xxxxxxxxx	6.6497	3.7777	21	294	(ter Laak, Durjava, Struijs, Hermens, 2005)	Water (Log)	dimensionless	C1=CC=C2C(=C1)C=CC3=CC=CC=C32	178.24	7.222	4.35	-2.872	-2.762	0.00576	0.0875	-1.05799	-2.23958	81.806	20	-101.806	-3.1148	0	0.23	7.71	1.34	1.45
304	Phenanthrene	000085-01-8	PDMS	9.4362e+06	6.9748	7244.36	3.86	xxxxxxxxx	xxxxxxxxx	xxxxxxxxx	xxxxxxxxx	xxxxxxxxx	6.7797	3.9077	21	294	(ter Laak, Durjava, Struijs, Hermens, 2005)	Water (Log)	dimensionless	C1=CC=C2C(=C1)C=CC3=CC=CC=C32	178.24	7.222	4.35	-2.872	-2.762	0.00576	0.0875	-1.05799	-2.23958	81.806	20	-101.806	-3.1148	0	0.23	7.71	1.34	1.45
764	fluoranthene	000206-44-0	PDMS	1.30457e+08	8.11547	15135.6	4.18	xxxxxxxxx	xxxxxxxxx	xxxxxxxxx	xxxxxxxxx	xxxxxxxxx	7.8987	4.2277	21	294	(ter Laak, Durjava, Struijs, Hermens, 2005)	Water (Log)	dimensionless	C1=CC=C2C(=C1)C3=CC=CC4=C3C2=CC=C4	202.26	8.601	4.93	-3.671	-3.441	0.000417	0.00811	-2.09098	-3.37986	90.892	20	-110.892	-3.93547	0	0.25	9.11	1.52	1.58
685	Pyrene	000129-00-0	PDMS	5.55939e+07	7.74503	16595.9	4.22	xxxxxxxxx	xxxxxxxxx	xxxxxxxxx	xxxxxxxxx	xxxxxxxxx	7.5307	4.2677	21	294	(ter Laak, Durjava, Struijs, Hermens, 2005)	Water (Log)	dimensionless	C1=CC2=C3C(=C1)C=CC4=CC=CC(=C43)C=C2	202.26	8.193	4.93	-3.263	-3.313	4.59e-05	0.0106	-1.97469	-4.33819	89.8692	20	-109.869	-3.52503	0	0.25	9.11	1.52	1.58
765	fluoranthene	000206-44-0	PDMS	2.16504e+08	8.33547	25118.9	4.4	xxxxxxxxx	xxxxxxxxx	xxxxxxxxx	xxxxxxxxx	xxxxxxxxx	8.1187	4.4477	21	294	(ter Laak, Durjava, Struijs, Hermens, 2005)	Water (Log)	dimensionless	C1=CC=C2C(=C1)C3=CC=CC4=C3C2=CC=C4	202.26	8.601	4.93	-3.671	-3.441	0.000417	0.00811	-2.09098	-3.37986	90.892	20	-110.892	-3.93547	0	0.25	9.11	1.52	1.58
686	Pyrene	000129-00-0	PDMS	8.61048e+07	7.93503	25704	4.41	xxxxxxxxx	xxxxxxxxx	xxxxxxxxx	xxxxxxxxx	xxxxxxxxx	7.7207	4.4577	21	294	(ter Laak, Durjava, Struijs, Hermens, 2005)	Water (Log)	dimensionless	C1=CC2=C3C(=C1)C=CC4=CC=CC(=C43)C=C2	202.26	8.193	4.93	-3.263	-3.313	4.59e-05	0.0106	-1.97469	-4.33819	89.8692	20	-109.869	-3.52503	0	0.25	9.11	1.52	1.58
64	Benz[a]anthracene	000056-55-3	PDMS	2.77266e+08	8.4429	38904.5	4.59	xxxxxxxxx	xxxxxxxxx	xxxxxxxxx	xxxxxxxxx	xxxxxxxxx	8.1867	4.6377	21	294	(ter Laak, Durjava, Struijs, Hermens, 2005)	Water (Log)	dimensionless	C1=CC=C2C(=C1)C=CC3=CC4=CC=CC=C4C=C32	228.3	9.069	5.52	-3.549	-3.309	3.62e-05	0.000107	-3.97062	-4.44129	107.425	20	-127.425	-3.8529	0	0.29	10.08	1.66	1.82
65	Benz[a]anthracene	000056-55-3	PDMS	5.92784e+08	8.7729	83176.4	4.92	xxxxxxxxx	xxxxxxxxx	xxxxxxxxx	xxxxxxxxx	xxxxxxxxx	8.5167	4.9677	21	294	(ter Laak, Durjava, Struijs, Hermens, 2005)	Water (Log)	dimensionless	C1=CC=C2C(=C1)C=CC3=CC4=CC=CC=C4C=C32	228.3	9.069	5.52	-3.549	-3.309	3.62e-05	0.000107	-3.97062	-4.44129	107.425	20	-127.425	-3.8529	0	0.29	10.08	1.66	1.82
743	Benzo[b]fluoranthene	000205-99-2	PDMS	1.94779e+09	9.28954	58884.4	4.77	xxxxxxxxx	xxxxxxxxx	xxxxxxxxx	xxxxxxxxx	xxxxxxxxx	9.0587	4.8177	21	294	(ter Laak, Durjava, Struijs, Hermens, 2005)	Water (Log)	dimensionless	C1=CC=C2C3=C4C(=CC=C3)C5=CC=CC=C5C4=CC2=C1	252.32	10.351	6.11	-4.241	-4.571	3.32e-06	0.00173	-2.76195	-5.47886	96.7938	20	-116.794	-4.51954	0	0.31	11.48	1.84	1.95
744	Benzo[b]fluoranthene	000205-99-2	PDMS	6.30292e+09	9.79954	190546	5.28	xxxxxxxxx	xxxxxxxxx	xxxxxxxxx	xxxxxxxxx	xxxxxxxxx	9.5687	5.3277	21	294	(ter Laak, Durjava, Struijs, Hermens, 2005)	Water (Log)	dimensionless	C1=CC=C2C3=C4C(=CC=C3)C5=CC=CC=C5C4=CC2=C1	252.32	10.351	6.11	-4.241	-4.571	3.32e-06	0.00173	-2.76195	-5.47886	96.7938	20	-116.794	-4.51954	0	0.31	11.48	1.84	1.95
772	Benzo[k]fluoranthene	000207-08-9	PDMS	1.72707e+10	10.2373	194984	5.29	xxxxxxxxx	xxxxxxxxx	xxxxxxxxx	xxxxxxxxx	xxxxxxxxx	9.9597	5.3377	21	294	(ter Laak, Durjava, Struijs, Hermens, 2005)	Water (Log)	dimensionless	C1=CC=C2C=C3C4=CC=CC5=C4C(=CC=C5)C3=CC2=C1	252.32	10.732	6.11	-4.622	-4.622	1.05e-07	1.02e-05	-4.9914	-6.97881	116.404	20	-136.404	-4.94731	0	0.31	11.48	1.84	1.95
44	Dibenz[ah]anthracene	000053-70-3	PDMS	1.67313e+10	10.2235	67608.3	4.83	xxxxxxxxx	xxxxxxxxx	xxxxxxxxx	xxxxxxxxx	xxxxxxxxx	9.9567	4.8777	21	294	(ter Laak, Durjava, Struijs, Hermens, 2005)	Water (Log)	dimensionless	C1=CC=C2C(=C1)C=CC3=CC4=C(C=CC5=CC=CC=C54)C=C32	278.36	11.779	6.7	-5.079	-5.239	1.85e-09	3.33e-05	-4.47756	-8.73283	111.884	20	-131.884	-5.39353	0	0.35	12.45	1.99	2.19
724	Benzo[ghi]perylene	000191-24-2	PDMS	9.7364e+10	10.9884	245471	5.39	xxxxxxxxx	xxxxxxxxx	xxxxxxxxx	xxxxxxxxx	xxxxxxxxx	10.7087	5.4377	21	294	(ter Laak, Durjava, Struijs, Hermens, 2005)	Water (Log)	dimensionless	c1cc2ccc3ccc4ccc5cccc6c5c4c3c2c6c1	276.34	11.971	6.7	-5.271	-5.271	1.17e-07	8.11e-06	-5.09098	-6.93181	117.28	20	-137.28	-5.5984	0	0.33	12.89	2.02	2.08
725	Benzo[ghi]perylene	000191-24-2	PDMS	9.7364e+10	10.9884	245471	5.39	xxxxxxxxx	xxxxxxxxx	xxxxxxxxx	xxxxxxxxx	xxxxxxxxx	10.7087	5.4377	21	294	(ter Laak, Durjava, Struijs, Hermens, 2005)	Water (Log)	dimensionless	c1cc2ccc3ccc4ccc5cccc6c5c4c3c2c6c1	276.34	11.971	6.7	-5.271	-5.271	1.17e-07	8.11e-06	-5.09098	-6.93181	117.28	20	-137.28	-5.5984	0	0.33	12.89	2.02	2.08
401	Acetophenone	000098-86-2	Liquid board triplex	169	2.22789	5.31511	0.725512	0.94	2.20101	0.69864	158.86	4.9962	3.51969	0.238695	70	343	(Triantafyllou et al., 2007)	Air	cm^3/g	CC(=O)C1=CC=CC=C1	120.15	4.951	1.67	-3.281	-3.371	43.5	52.9	1.72346	1.63849	57.3407	20	-77.3407	-1.50237	0	0.42	4.63	1.13	1.01
400	Acetophenone	000098-86-2	Liquid board triplex	138	2.13988	38.4444	1.58483	0.94	2.11301	1.55796	129.72	36.1378	4.13404	0.85304	100	373	(Triantafyllou et al., 2007)	Air	cm^3/g	CC(=O)C1=CC=CC=C1	120.15	4.951	1.67	-3.281	-3.371	43.5	52.9	1.72346	1.63849	57.3407	20	-77.3407	-0.555046	0	0.42	4.63	1.13	1.01
347	Napthalene	000091-20-3	Liquid board triplex	56	1.74819	47.4886	1.67659	0.94	1.72132	1.64972	52.64	44.6393	3.06477	1.18977	70	343	(Triantafyllou et al., 2007)	Air	cm^3/g	C1=CC=C2C=CC=CC2=C1	128.18	5.045	3.17	-1.875	-1.745	5.38	39.9	1.60097	0.730782	58.418	20	-78.418	-0.0715985	0	0.17	5.33	1.02	1.09
348	Napthalene	000091-20-3	Liquid board triplex	72	1.85733	557.518	2.74626	0.94	1.83046	2.71939	67.68	524.067	3.88947	2.01447	100	373	(Triantafyllou et al., 2007)	Air	cm^3/g	C1=CC=C2C=CC=CC2=C1	128.18	5.045	3.17	-1.875	-1.745	5.38	39.9	1.60097	0.730782	58.418	20	-78.418	0.888926	0	0.17	5.33	1.02	1.09
597	Benzophenone	000119-61-9	Liquid board triplex	271	2.43297	3.18385	0.502952	0.94	2.4061	0.47608	254.74	2.99282	4.14713	0.0161345	70	343	(Triantafyllou et al., 2007)	Air	cm^3/g	C1=CC=C(C=C1)C(=O)C2=CC=CC=C2	182.22	7.281	3.15	-4.131	-4.101	0.121	0.432	-0.364516	-0.917215	75.7062	20	-95.7062	-1.93002	0	0.51	7.31	1.59	1.48
596	Benzophenone	000119-61-9	Liquid board triplex	230	2.36173	40.1786	1.60399	0.94	2.33486	1.57712	216.2	37.7679	5.0032	0.872202	100	373	(Triantafyllou et al., 2007)	Air	cm^3/g	C1=CC=C(C=C1)C(=O)C2=CC=CC=C2	182.22	7.281	3.15	-4.131	-4.101	0.121	0.432	-0.364516	-0.917215	75.7062	20	-95.7062	-0.757733	0	0.51	7.31	1.59	1.48
281	Dibutyl phtalate	000084-74-2	Liquid board triplex	597	2.77597	25.2617	1.40246	0.94	2.7491	1.37559	561.18	23.746	4.93664	0.915645	70	343	(Triantafyllou et al., 2007)	Air	cm^3/g	CCCCOC(=O)C1=CC=CC=C1C(=O)OCCCC	278.35	8.631	4.61	-4.021	-4.131	0.0303	0.00268	-2.57187	-1.51856	95.1218	20	-115.122	-1.37351	0	0.8	9.09	1.4	2.27
280	Dibutyl phtalate	000084-74-2	Liquid board triplex	561	2.74896	610.312	2.78555	0.94	2.72209	2.75868	527.34	573.693	6.07476	2.05376	100	373	(Triantafyllou et al., 2007)	Air	cm^3/g	CCCCOC(=O)C1=CC=CC=C1C(=O)OCCCC	278.35	8.631	4.61	-4.021	-4.131	0.0303	0.00268	-2.57187	-1.51856	95.1218	20	-115.122	0.0365889	0	0.8	9.09	1.4	2.27
584	Methyl stearate	000112-61-8	Liquid board triplex	935	2.97081	213186	5.32876	0.94	2.94394	5.30189	878.9	200395	5.13794	4.84194	70	343	(Triantafyllou et al., 2007)	Air	cm^3/g	CCCCCCCCCCCCCCCCCC(=O)OC	298.51	8.526	8.23	-0.296	-0.176	0.00438	0.00249	-2.6038	-2.35853	95.4027	20	-115.403	2.35795	0	0.41	9.77	0.64	2.86
583	Methyl stearate	000112-61-8	Liquid board triplex	520	2.716	3.07251e+06	6.48749	0.94	2.68913	6.46062	488.8	2.88816e+06	6.0517	5.7557	100	373	(Triantafyllou et al., 2007)	Air	cm^3/g	CCCCCCCCCCCCCCCCCC(=O)OC	298.51	8.526	8.23	-0.296	-0.176	0.00438	0.00249	-2.6038	-2.35853	95.4027	20	-115.403	3.77149	0	0.41	9.77	0.64	2.86
399	Acetophenone	000098-86-2	Testliner: 100% recycled	778	2.89098	24.4684	1.38861	0.5	2.58995	1.08758	389	12.2342	3.90863	0.62763	70	343	(Triantafyllou et al., 2007)	Air	cm^3/g	CC(=O)C1=CC=CC=C1	120.15	4.951	1.67	-3.281	-3.371	43.5	52.9	1.72346	1.63849	57.3407	20	-77.3407	-1.50237	0	0.42	4.63	1.13	1.01
398	Acetophenone	000098-86-2	Testliner: 100% recycled	568	2.75435	158.235	2.1993	0.5	2.45332	1.89827	284	79.1175	4.47435	1.19335	100	373	(Triantafyllou et al., 2007)	Air	cm^3/g	CC(=O)C1=CC=CC=C1	120.15	4.951	1.67	-3.281	-3.371	43.5	52.9	1.72346	1.63849	57.3407	20	-77.3407	-0.555046	0	0.42	4.63	1.13	1.01
342	Napthalene	000091-20-3	Testliner: 100% recycled	213	2.32838	180.626	2.25678	0.5	2.02735	1.95575	106.5	90.3132	3.37081	1.49581	70	343	(Triantafyllou et al., 2007)	Air	cm^3/g	C1=CC=C2C=CC=CC2=C1	128.18	5.045	3.17	-1.875	-1.745	5.38	39.9	1.60097	0.730782	58.418	20	-78.418	-0.0715985	0	0.17	5.33	1.02	1.09
341	Napthalene	000091-20-3	Testliner: 100% recycled	201	2.3032	1556.4	3.19212	0.5	2.00217	2.89109	100.5	778.202	4.06117	2.18617	100	373	(Triantafyllou et al., 2007)	Air	cm^3/g	C1=CC=C2C=CC=CC2=C1	128.18	5.045	3.17	-1.875	-1.745	5.38	39.9	1.60097	0.730782	58.418	20	-78.418	0.888926	0	0.17	5.33	1.02	1.09
594	Benzophenone	000119-61-9	Testliner: 100% recycled	360	2.5563	4.22946	0.626285	0.5	2.25527	0.325255	180	2.11473	3.99631	-0.13469	70	343	(Triantafyllou et al., 2007)	Air	cm^3/g	C1=CC=C(C=C1)C(=O)C2=CC=CC=C2	182.22	7.281	3.15	-4.131	-4.101	0.121	0.432	-0.364516	-0.917215	75.7062	20	-95.7062	-1.93002	0	0.51	7.31	1.59	1.48
595	Benzophenone	000119-61-9	Testliner: 100% recycled	396	2.5977	69.1771	1.83996	0.5	2.29667	1.53893	198	34.5885	4.96501	0.834011	100	373	(Triantafyllou et al., 2007)	Air	cm^3/g	C1=CC=C(C=C1)C(=O)C2=CC=CC=C2	182.22	7.281	3.15	-4.131	-4.101	0.121	0.432	-0.364516	-0.917215	75.7062	20	-95.7062	-0.757733	0	0.51	7.31	1.59	1.48
282	Dibutyl phtalate	000084-74-2	Testliner: 100% recycled	912	2.95999	38.5907	1.58648	0.5	2.65896	1.28545	456	19.2954	4.84651	0.825507	70	343	(Triantafyllou et al., 2007)	Air	cm^3/g	CCCCOC(=O)C1=CC=CC=C1C(=O)OCCCC	278.35	8.631	4.61	-4.021	-4.131	0.0303	0.00268	-2.57187	-1.51856	95.1218	20	-115.122	-1.37351	0	0.8	9.09	1.4	2.27
283	Dibutyl phtalate	000084-74-2	Testliner: 100% recycled	1050	3.02119	1142.29	3.05778	0.5	2.72016	2.75675	525	571.147	6.07283	2.05183	100	373	(Triantafyllou et al., 2007)	Air	cm^3/g	CCCCOC(=O)C1=CC=CC=C1C(=O)OCCCC	278.35	8.631	4.61	-4.021	-4.131	0.0303	0.00268	-2.57187	-1.51856	95.1218	20	-115.122	0.0365889	0	0.8	9.09	1.4	2.27
586	Methyl stearate	000112-61-8	Testliner: 100% recycled	984	2.993	224359	5.35094	0.5	2.69197	5.04991	492	112179	4.88597	4.58997	70	343	(Triantafyllou et al., 2007)	Air	cm^3/g	CCCCCCCCCCCCCCCCCC(=O)OC	298.51	8.526	8.23	-0.296	-0.176	0.00438	0.00249	-2.6038	-2.35853	95.4027	20	-115.403	2.35795	0	0.41	9.77	0.64	2.86
585	Methyl stearate	000112-61-8	Testliner: 100% recycled	730	2.86332	4.31333e+06	6.63481	0.5	2.56229	6.33378	365	2.15666e+06	5.92486	5.62886	100	373	(Triantafyllou et al., 2007)	Air	cm^3/g	CCCCCCCCCCCCCCCCCC(=O)OC	298.51	8.526	8.23	-0.296	-0.176	0.00438	0.00249	-2.6038	-2.35853	95.4027	20	-115.403	3.77149	0	0.41	9.77	0.64	2.86
813	?ý-HCH	000319-85-7	PDMS	2.9397e+06	6.4683	457.088	2.66	xxxxxxxxx	xxxxxxxxx	xxxxxxxxx	xxxxxxxxx	xxxxxxxxx	6.2647	2.7077	21	294	(Valor, Perez, Cortada, Apraiz, Molto, Font, 2001)	Water (Log)	dimensionless	C1(C(C(C(C(C1Cl)Cl)Cl)Cl)Cl)Cl	290.83	7.817	4.26	-3.557	-3.677	0.0674	0.0344	-1.46344	-1.17134	85.3722	20	-105.372	-3.8083	0	0.4	7	1.1	1.58
98	??-HCH	000058-89-9	PDMS	9.08453e+06	6.9583	1412.54	3.15	xxxxxxxxx	xxxxxxxxx	xxxxxxxxx	xxxxxxxxx	xxxxxxxxx	6.7547	3.1977	21	294	(Valor, Perez, Cortada, Apraiz, Molto, Font, 2001)	Water (Log)	dimensionless	C1(C(C(C(C(C1Cl)Cl)Cl)Cl)Cl)Cl	290.83	7.817	4.26	-3.557	-3.677	0.0674	0.0344	-1.46344	-1.17134	85.3722	20	-105.372	-3.8083	0	0.4	7	1.1	1.58
809	?ñ-HCH	000319-84-6	PDMS	9.51267e+06	6.9783	1479.11	3.17	xxxxxxxxx	xxxxxxxxx	xxxxxxxxx	xxxxxxxxx	xxxxxxxxx	6.7747	3.2177	21	294	(Valor, Perez, Cortada, Apraiz, Molto, Font, 2001)	Water (Log)	dimensionless	C1(C(C(C(C(C1Cl)Cl)Cl)Cl)Cl)Cl	290.83	7.817	4.26	-3.557	-3.677	0.0674	0.0344	-1.46344	-1.17134	85.3722	20	-105.372	-3.8083	0	0.4	7	1.1	1.58
817	??-HCH	000319-86-8	PDMS	1.28322e+07	7.1083	1995.26	3.3	xxxxxxxxx	xxxxxxxxx	xxxxxxxxx	xxxxxxxxx	xxxxxxxxx	6.9047	3.3477	21	294	(Valor, Perez, Cortada, Apraiz, Molto, Font, 2001)	Water (Log)	dimensionless	C1(C(C(C(C(C1Cl)Cl)Cl)Cl)Cl)Cl	290.83	7.817	4.26	-3.557	-3.677	0.0674	0.0344	-1.46344	-1.17134	85.3722	20	-105.372	-3.8083	0	0.4	7	1.1	1.58
626	simazine	000122-34-9	PDMS	3.69904e+08	8.56809	12	1.07918	xxxxxxxxx	xxxxxxxxx	xxxxxxxxx	xxxxxxxxx	xxxxxxxxx	8.32088	1.12688	21	294	(Valor, Perez, Cortada, Apraiz, Molto, Font, 2001)	water	dimensionless	CCNC1=NC(=NC(=N1)Cl)NCC	201.66	9.594	2.4	-7.194	-7.414	0.00122	0.000287	-3.54212	-2.91364	103.656	20	-123.656	-7.48891	0.36	0.86	7.18	1.25	1.48
975	atrazine	001912-24-9	PDMS	3.5555e+08	8.5509	29	1.4624	xxxxxxxxx	xxxxxxxxx	xxxxxxxxx	xxxxxxxxx	xxxxxxxxx	8.3161	1.5101	21	294	(Valor, Perez, Cortada, Apraiz, Molto, Font, 2001)	water	dimensionless	CCNC1=NC(=NC(=N1)Cl)NC(C)C	215.69	9.626	2.82	-6.806	-7.016	0.00381	0.00112	-2.95078	-2.41908	98.4547	20	-118.455	-7.0885	0.36	0.89	7.56	1.24	1.62
1012	terbuthylazine	005915-41-3	PDMS	1.12828e+08	8.05242	106	2.02531	xxxxxxxxx	xxxxxxxxx	xxxxxxxxx	xxxxxxxxx	xxxxxxxxx	7.831	2.073	21	294	(Valor, Perez, Cortada, Apraiz, Molto, Font, 2001)	water	dimensionless	CCNC1=NC(=NC(=N1)Cl)NC(C)(C)C	229.71	9.028	3.27	-5.758	-5.818	0.00215	0.00487	-2.31247	-2.66756	92.8402	20	-112.84	-6.02711	0.36	0.9	7.84	1.19	1.76
696	propazine	000139-40-2	PDMS	2.34168e+08	8.36953	47	1.6721	xxxxxxxxx	xxxxxxxxx	xxxxxxxxx	xxxxxxxxx	xxxxxxxxx	8.1358	1.7198	21	294	(Valor, Perez, Cortada, Apraiz, Molto, Font, 2001)	water	dimensionless	CC(C)NC1=NC(=NC(=N1)Cl)NC(C)C	229.71	9.656	3.24	-6.416	-6.726	0.000971	0.00126	-2.89963	-3.01278	98.0048	20	-118.005	-6.69743	0.36	0.92	7.94	1.23	1.76
937	fonofos	000944-22-9	PDMS	5.33968e+06	6.72751	1032	3.01368	xxxxxxxxx	xxxxxxxxx	xxxxxxxxx	xxxxxxxxx	xxxxxxxxx	6.52638	3.06138	21	294	(Valor, Perez, Cortada, Apraiz, Molto, Font, 2001)	water	dimensionless	CCOP(=S)(CC)SC1=CC=CC=C1	246.32	7.485	4.02	-3.465	-3.545	0.0734	0.0451	-1.34582	-1.1343	84.3377	20	-104.338	-3.71384	0	0.64	8.48	0.88	1.87
799	methyl-parathion	000298-00-0	PDMS	8.68129e+07	7.93858	142	2.15229	xxxxxxxxx	xxxxxxxxx	xxxxxxxxx	xxxxxxxxx	xxxxxxxxx	7.69799	2.19999	21	294	(Valor, Perez, Cortada, Apraiz, Molto, Font, 2001)	water	dimensionless	COP(=S)(OC)OC1=CC=C(C=C1)[N+](=O)[O-]	263.21	8.248	2.75	-5.498	-5.388	0.0155	0.000593	-3.22695	-1.80967	100.884	20	-120.884	-5.7863	0	1.03	8.49	1.6	1.72
1050	cyanazine	021725-46-2	PDMS	3.81364e+10	10.5813	4	0.60206	xxxxxxxxx	xxxxxxxxx	xxxxxxxxx	xxxxxxxxx	xxxxxxxxx	10.3388	0.649758	21	294	(Valor, Perez, Cortada, Apraiz, Molto, Font, 2001)	water	dimensionless	CCNC1=NC(=NC(=N1)Cl)NC(C)(C)C#N	240.7	12.199	2.51	-9.689	-9.979	0.000202	0.000477	-3.32148	-3.69465	101.715	20	-121.715	-9.97928	0.36	1.07	8.56	1.74	1.77
931	ametryn	000834-12-8	PDMS	9.37659e+08	8.97204	107	2.02938	xxxxxxxxx	xxxxxxxxx	xxxxxxxxx	xxxxxxxxx	xxxxxxxxx	8.74008	2.07708	21	294	(Valor, Perez, Cortada, Apraiz, Molto, Font, 2001)	water	dimensionless	CCNC1=NC(=NC(=N1)SC)NC(C)C	227.33	9.983	3.32	-6.663	-7.003	0.00573	0.00153	-2.81531	-2.24185	97.2631	20	-117.263	-6.94266	0.26	1.07	8.72	1.27	1.8
624	phenitrothion	000122-14-5	PDMS	1.63858e+07	7.21447	338	2.52892	xxxxxxxxx	xxxxxxxxx	xxxxxxxxx	xxxxxxxxx	xxxxxxxxx	6.99661	2.57661	21	294	(Valor, Perez, Cortada, Apraiz, Molto, Font, 2001)	water	dimensionless	CC1=C(C=CC(=C1)OP(=S)(OC)OC)[N+](=O)[O-]	277.23	7.72	3.3	-4.42	-4.42	0.0102	0.0072	-2.14267	-1.9914	91.3466	20	-111.347	-4.68555	0	1.03	8.96	1.54	1.86
236	Heptachlor	000076-44-8	PDMS	272898	5.436	4713	3.6733	xxxxxxxxx	xxxxxxxxx	xxxxxxxxx	xxxxxxxxx	xxxxxxxxx	5.251	3.721	21	294	(Valor, Perez, Cortada, Apraiz, Molto, Font, 2001)	water	dimensionless	C1=CC(C2C1C3(C(=C(C2(C3(Cl)Cl)Cl)Cl)Cl)Cl)Cl	373.32	7.39	5.86	-1.53	-1.92	0.0317	0.265	-0.576754	-1.49894	77.5731	20	-97.5731	-1.7627	0	0.42	8.96	1.27	1.96
235	Heptachlor	000076-44-8	PDMS	372896	5.57159	6440	3.80889	xxxxxxxxx	xxxxxxxxx	xxxxxxxxx	xxxxxxxxx	xxxxxxxxx	5.38658	3.85658	21	294	(Valor, Perez, Cortada, Apraiz, Molto, Font, 2001)	water	dimensionless	C1=CC(C2C1C3(C(=C(C2(C3(Cl)Cl)Cl)Cl)Cl)Cl)Cl	373.32	7.39	5.86	-1.53	-1.92	0.0317	0.265	-0.576754	-1.49894	77.5731	20	-97.5731	-1.7627	0	0.42	8.96	1.27	1.96
935	terbutryne	000886-50-0	PDMS	1.27666e+09	9.10607	630	2.79934	xxxxxxxxx	xxxxxxxxx	xxxxxxxxx	xxxxxxxxx	xxxxxxxxx	8.87304	2.84704	21	294	(Valor, Perez, Cortada, Apraiz, Molto, Font, 2001)	water	dimensionless	CCNC1=NC(=NC(=N1)SC)NC(C)(C)C	241.36	9.796	3.77	-6.026	-6.056	0.00313	0.00136	-2.86646	-2.50446	97.713	20	-117.713	-6.30673	0.26	1.08	9	1.22	1.94
47	fenthion	000055-38-9	PDMS	3.82195e+07	7.58228	1169	3.06781	xxxxxxxxx	xxxxxxxxx	xxxxxxxxx	xxxxxxxxx	xxxxxxxxx	7.34951	3.11551	21	294	(Valor, Perez, Cortada, Apraiz, Molto, Font, 2001)	water	dimensionless	CC1=C(C=CC(=C1)OP(=S)(OC)OC)SC	278.32	8.314	4.08	-4.234	-4.224	0.0184	0.0014	-2.85387	-1.73518	97.6023	20	-117.602	-4.51447	0	1.05	9.09	1.1	1.99
1028	prometryne	007287-19-6	PDMS	6.14389e+08	8.78844	260	2.41497	xxxxxxxxx	xxxxxxxxx	xxxxxxxxx	xxxxxxxxx	xxxxxxxxx	8.55567	2.46267	21	294	(Valor, Perez, Cortada, Apraiz, Molto, Font, 2001)	water	dimensionless	CC(C)NC1=NC(=NC(=N1)SC)NC(C)C	241.36	9.823	3.73	-6.093	-6.313	0.00247	0.0014	-2.85387	-2.6073	97.6023	20	-117.602	-6.37347	0.26	1.1	9.1	1.26	1.94
215	p,p'-DDE	000072-55-9	PDMS	3.76856e+06	6.57618	1059	3.0249	xxxxxxxxx	xxxxxxxxx	xxxxxxxxx	xxxxxxxxx	xxxxxxxxx	6.35159	3.07259	21	294	(Valor, Perez, Cortada, Apraiz, Molto, Font, 2001)	water	dimensionless	C1=CC(=CC=C1C(=C(Cl)Cl)C2=CC=C(C=C2)Cl)Cl	318.03	9.279	6	-3.279	-2.769	0.00913	0.00344	-2.46344	-2.03953	94.1681	20	-114.168	-3.55128	0	0.3	9.38	1.53	2.05
214	p,p'-DDE	000072-55-9	PDMS	9.58333e+06	6.98152	2693	3.43024	xxxxxxxxx	xxxxxxxxx	xxxxxxxxx	xxxxxxxxx	xxxxxxxxx	6.75693	3.47793	21	294	(Valor, Perez, Cortada, Apraiz, Molto, Font, 2001)	water	dimensionless	C1=CC(=CC=C1C(=C(Cl)Cl)C2=CC=C(C=C2)Cl)Cl	318.03	9.279	6	-3.279	-2.769	0.00913	0.00344	-2.46344	-2.03953	94.1681	20	-114.168	-3.55128	0	0.3	9.38	1.53	2.05
196	p,p'-DDD	000072-54-8	PDMS	6.04904e+06	6.78169	604	2.78104	xxxxxxxxx	xxxxxxxxx	xxxxxxxxx	xxxxxxxxx	xxxxxxxxx	6.54773	2.82873	21	294	(Valor, Perez, Cortada, Apraiz, Molto, Font, 2001)	water	dimensionless	C1=CC(=CC=C1C(C2=CC=C(C=C2)Cl)C(Cl)Cl)Cl	320.05	9.589	5.87	-3.719	-3.569	0.0026	0.00123	-2.91009	-2.58503	98.0968	20	-118.097	-4.00065	0.09	0.22	9.45	1.44	2.1
195	p,p'-DDD	000072-54-8	PDMS	4.99046e+07	7.69814	4983	3.69749	xxxxxxxxx	xxxxxxxxx	xxxxxxxxx	xxxxxxxxx	xxxxxxxxx	7.46419	3.74519	21	294	(Valor, Perez, Cortada, Apraiz, Molto, Font, 2001)	water	dimensionless	C1=CC(=CC=C1C(C2=CC=C(C=C2)Cl)C(Cl)Cl)Cl	320.05	9.589	5.87	-3.719	-3.569	0.0026	0.00123	-2.91009	-2.58503	98.0968	20	-118.097	-4.00065	0.09	0.22	9.45	1.44	2.1
54	parathion	000056-38-2	PDMS	1.09383e+08	8.03895	550	2.74036	xxxxxxxxx	xxxxxxxxx	xxxxxxxxx	xxxxxxxxx	xxxxxxxxx	7.80206	2.78806	21	294	(Valor, Perez, Cortada, Apraiz, Molto, Font, 2001)	water	dimensionless	CCOP(=S)(OCC)OC1=CC=C(C=C1)[N+](=O)[O-]	291.26	8.744	3.73	-5.014	-4.914	0.00445	0.000891	-3.05012	-2.35164	99.3285	20	-119.328	-5.29859	0	1.03	9.48	1.61	2
804	aldrin	000309-00-2	PDMS	95803.2	4.98138	857	2.93298	xxxxxxxxx	xxxxxxxxx	xxxxxxxxx	xxxxxxxxx	xxxxxxxxx	4.78168	2.98068	21	294	(Valor, Perez, Cortada, Apraiz, Molto, Font, 2001)	water	dimensionless	C1C2C=CC1C3C2C4(C(=C(C3(C4(Cl)Cl)Cl)Cl)Cl)Cl	364.92	7.861	6.06	-1.801	-1.801	0.00587	0.0528	-1.27737	-2.23136	83.7356	20	-103.736	-2.0484	0	0.43	9.48	1.2	2.01
803	aldrin	000309-00-2	PDMS	236434	5.37371	2115	3.32531	xxxxxxxxx	xxxxxxxxx	xxxxxxxxx	xxxxxxxxx	xxxxxxxxx	5.17401	3.37301	21	294	(Valor, Perez, Cortada, Apraiz, Molto, Font, 2001)	water	dimensionless	C1C2C=CC1C3C2C4(C(=C(C3(C4(Cl)Cl)Cl)Cl)Cl)Cl	364.92	7.861	6.06	-1.801	-1.801	0.00587	0.0528	-1.27737	-2.23136	83.7356	20	-103.736	-2.0484	0	0.43	9.48	1.2	2.01
1006	trietazyne	005011-34-7	PDMS	1.31087e+14	14.1176	234	2.36922	xxxxxxxxx	xxxxxxxxx	xxxxxxxxx	xxxxxxxxx	xxxxxxxxx	13.8989	2.41691	21	294	(Valor, Perez, Cortada, Apraiz, Molto, Font, 2001)	water	dimensionless	COC1=C(C(=C(C=C1)CN2CCNCC2)OC)OC	266.34	12.112	0.63	-11.482	-11.482	0.000459	0.0066	-2.18046	-3.33819	91.679	20	-111.679	-11.7483	0.16	1.67	9.76	2	2.11
588	tetradifon	000116-29-0	PDMS	2.14389e+10	10.3312	2083	3.31869	xxxxxxxxx	xxxxxxxxx	xxxxxxxxx	xxxxxxxxx	xxxxxxxxx	10.0264	3.36639	21	294	(Valor, Perez, Cortada, Apraiz, Molto, Font, 2001)	water	dimensionless	C1=CC(=CC=C1S(=O)(=O)C2=CC(=C(C=C2Cl)Cl)Cl)Cl	356.05	11.84	5.18	-6.66	-7.23	1.35e-05	5.15e-07	-6.28819	-4.86967	127.81	20	-147.81	-7.01251	0	0.57	9.84	2.39	2.09
819	diazinon	000333-41-5	PDMS	2.06669e+08	8.31527	588	2.76938	xxxxxxxxx	xxxxxxxxx	xxxxxxxxx	xxxxxxxxx	xxxxxxxxx	8.10208	2.81708	21	294	(Valor, Perez, Cortada, Apraiz, Molto, Font, 2001)	water	dimensionless	CCOP(=S)(OCC)OC1=NC(=NC(=C1)C)C(C)C	304.35	9.145	3.86	-5.285	-5.335	0.00724	0.012	-1.92082	-2.14026	89.3953	20	-109.395	-5.5459	0	1.38	9.86	1.1	2.31
998	chlorpiryphos	002921-88-2	PDMS	2.20227e+07	7.34287	1995	3.29994	xxxxxxxxx	xxxxxxxxx	xxxxxxxxx	xxxxxxxxx	xxxxxxxxx	7.11964	3.34764	21	294	(Valor, Perez, Cortada, Apraiz, Molto, Font, 2001)	water	dimensionless	CCOP(=S)(OCC)OC1=NC(=C(C=C1Cl)Cl)Cl	350.59	8.882	5.11	-3.772	-3.922	0.00273	0.00399	-2.39903	-2.56384	93.6015	20	-113.602	-4.04293	0	1.06	9.88	1.45	2.15
[truncated: 65 more rows]

## Sheet: Sheet3
Intercept	X Variable 1	X Variable 2	X Variable 3	X Variable 4	X Variable 5			Intercept	X Variable 1	X Variable 2	X Variable 3	X Variable 4	X Variable 5
[truncated: 1,274 more rows]

[truncated: 13 more sheets: polyethylene, polyurethane, polydimethylsiloxane, carbohydrates, carbohydrates without PAPER, PAPER subsegment, polyoxymethylene, nylon, polyacrylate, vinyl, PET, Outliers, Slopes and Intercepts spLFERs]
